# Supplementary material
Source: PubMed Central journal article supplement (PMC3286633)

# Supporting Information

## Total Synthesis of *N*-Acetylglucosamine-1,6-anhydro-*N*-acetylmuramylpentapeptide and Evaluation of Its Turnover by AmpD from *Escherichia coli*

*Dusan Heseck, Mijoon Lee, Weilie Zhang, Bruce C. Noll and Shahriar Mobashery\**

Department of Chemistry and Biochemistry, University of Notre Dame, Notre Dame, IN 46556

### Contents

|                                                                                                                          |     |
|--------------------------------------------------------------------------------------------------------------------------|-----|
| General Information .....                                                                                                | S2  |
| Experimental Procedures .....                                                                                            | S3  |
| Table S1. Crystallographic details.....                                                                                  | S17 |
| Figures S1 – S6. ORTEP diagrams of compounds <b>4a</b> , <b>5</b> , <b>6</b> , <b>8</b> , <b>11</b> , <b>30</b><br>..... | S18 |
| Copies of <sup>1</sup> H, <sup>13</sup> C, and 2D NMR Spectra.....                                                       | S21 |

## Experimental Data for Compounds

**General Procedures.** All organic reagents were purchased from either Sigma-Aldrich Chemical Company or Acros Organics, unless otherwise stated. All reactions were performed under an atmosphere of nitrogen unless noted otherwise. Reactions were monitored by thin-layer chromatography (TLC) carried out on Whatman reagents 0.25 mm silica gel 60-F plates that were visualized using UV light and/or aqueous cerium sulfate staining, followed by heating. Flash chromatography was carried out with silica gel 60, 230-400 mesh (0.040-0.063 mm particle size) purchased from EM Science. NMR spectra, including  $^1\text{H}$ ,  $^{13}\text{C}$ , DEPT, H-H COSY, and H-C HETCOR experiments, were recorded on a Varian UnityPlus 300, or a Varian INOVA-500, or Varian DirectDrive 600 spectrometer. Proton and Carbon chemical shifts were referenced to residual solvent peaks. NMR signal assignments for synthesized compounds were performed on the basis of H-H COSY, H-C HETCOR, and DEPT experiments. High-resolution mass spectra were obtained at the Department of Chemistry and Biochemistry, University of Notre Dame via FAB ionization, using a JEOL AX505HA mass spectrometer.

Analytical high performance liquid chromatography (HPLC) was performed on Waters 2414 instrument with SunFire C18 reversed-phased column (Waters) or delta-pak C18 reversed-phased column (Waters) using a linear gradient of 2-15% acetonitrile in water supplemented with 0.1% TFA over 40 min at 1 mL/min. Detection of the samples was by UV at 205 nm. Preparative HPLC purifications were performed using delta-pak C18 reversed-phased column, 100 Å pore size, 19 × 300 mm.

Crystals were examined under Infineum V8512 oil and placed on a MiTeGen mount, then transferred to the 100 K  $\text{N}_2$  stream (or 296 K) of either a Bruker SMART Apex CCD diffractometer or Bruker X8-Apex II CCD diffractometer. Unit cell parameters were determined from reflections with  $I > 10\sigma(I)$  harvested from three orthogonal sets of 30  $0.5^\circ$   $\omega$  scans. Data collection strategy was calculated using COSMO, included in the Apex2 suite of programs<sup>1</sup> to maximize coverage of reciprocal space in a minimum amount of time. Average 4-fold redundancy of measurements was sought. Data were corrected for Lorentz and polarization effects, as well as for absorption. Structure solution and refinement utilized the programs of the SHELXTL software package.<sup>2</sup> Full details of the X-ray structure determinations are in the CIF files included as Supporting Information.

---

<sup>1</sup> Apex2. Bruker-AXS: Madison, WI, 2008; Vol. 58.

<sup>2</sup> Sheldrick, G. M., *Acta Crystallogr. A*. **2008**, *64*, 112-122.

**Kinetic studies.** The assays were carried out in 20 mM sodium phosphate buffer, pH 7.0, at 25 °C with substrate concentrations ranging from 50  $\mu$ M to 3.0 mM and 1.5  $\mu$ M of AmpD. The reaction mixtures were incubated at 25 °C for 30 min. The reactions were stopped by the addition of 2 volume of 0.075% TFA in water. Reaction products were separated and quantified on a C18 reversed-phase HPLC column (Symmetry Shield RP18, 5  $\mu$ m, 3.9 mm by 150 mm; Waters) on a PerkinElmer series 200 System. The column was equilibrated with 0.05% trifluoroacetic acid in water and eluted with a linear acetonitrile gradient from 0 to 15% over 40 min with a flow rate of 1 mL/min. The column effluent was monitored at 205 nm. The catalytic activity of the AmpD was quantified from the rate of substrate disappearance and of pentapeptide appearance.

**4-*O*-Benzyl-3,6-di-*O*-*tert*-butyldimethylsilyl-D-(–)-glucal (4b).** The procedure was adapted from that reported by Bartolozzi *et al.*<sup>3</sup> A solution of **3** (37 g, 0.10 mol) in anhydrous DMF (400 mL), was treated with NaH (8.0 g, 0.20 mol, 60% in oil), in three portions under vigorous stirring. The resulting mixture was stirred at 35-40 °C for 30 min, followed by dropwise addition of a solution of benzyl bromide (17 mL, 0.14 mol) in DMF (10 mL), at the end of which the solution was stirred for 24 h. A total of 200 mL of hexanes were added and the biphasic mixture was vigorously stirred for 15 min and then the layers were allowed to separate. The upper layer was dried over MgSO<sub>4</sub>, filtered, and concentrated in vacuo, and the residue was purified by column chromatography on silica gel (hexanes/Et<sub>2</sub>O, 5:1), to afford the main fraction of **4b** (9.3 g) as a colorless oil in 20% yield. The lower phase was evaporated to dryness. The residue was carefully diluted with water, neutralized with AcOH (10%), and extracted with EtOAc (2  $\times$  250 mL). The combined organic solution was washed with water, dried over MgSO<sub>4</sub>, filtered, and was evaporated to dryness under reduced pressure. The residue was chromatographed on silica gel using a gradient elution of 20% – 95% Et<sub>2</sub>O in hexanes to provide the main compound as **4a** in 65% (23 g). When this reaction was performed in anhydrous THF instead of DMF, compound **4b** was obtained as the major product in 89%. **Compound 4b:** <sup>1</sup>H NMR (500 MHz, CDCl<sub>3</sub>),  $\delta$  0.07, 0.09, 0.10 and 0.11 (4 $\times$ s, 12H, SiCH<sub>3</sub>), 0.91 and 0.93 (2 $\times$ s, 18H, Si-C(CH<sub>3</sub>)<sub>3</sub>), 3.66 (dd,  $J$  = 8.1, 6.1 Hz, 1H, H-4), 3.85 (dd,  $J$  = 11.5, 2.3 Hz, 1H, H-6a), 3.90 (m, 1H, H-5), 3.97 (dd,  $J$  = 11.4, 4.6 Hz, 1H, H-6b), 4.35 (m, 1H, H-3), 4.65 (dd,  $J$  = 6.2, 2.6 Hz, 1H, H-2), 4.74 and 4.83 (AB,  $J$  = 11.2 Hz, 2H, OCH<sub>2</sub>Ph), 6.32 (dd,  $J$  = 6.2, 1.2 Hz, 1H, H-1), 7.28 - 7.39 (m, 5H); <sup>13</sup>C NMR (126 MHz, CDCl<sub>3</sub>),  $\delta$ -5.2 (q, SiCH<sub>3</sub>), -5.0 (q, SiCH<sub>3</sub>), -4.5 (q, SiCH<sub>3</sub>), -4.3 (q, SiCH<sub>3</sub>), 18.0 and 18.5 (2 $\times$ s, Si-C(CH<sub>3</sub>)<sub>3</sub>), 25.9 and 26.1 (2 $\times$ q, Si-C(CH<sub>3</sub>)<sub>3</sub>), 62.1 (t, C-6), 69.1 (d, C-3), 74.0 (t, OCH<sub>2</sub>Ph), 76.6 (d, C-4), 78.2 (d, C-5), 103.3 (d, C-2), 127.8, 127.9, 128.5, 138.5, 143.6 (d, C-1); HRMS (FAB), calcd for

<sup>3</sup> Bartolozzi, A.; Pacciani, S.; Benvenuti, C.; Cacciarini, M.; Liguori, F.; Menichetti, S.; Nativi, C. *J. Org. Chem.* **2003**, *68*, 8529-8533.

$C_{25}H_{43}O_4Si_2$  ( $M-H^+$ ), 463.2700, found 463.2702. **4-*O*-benzyl-6-*O*-*tert*-butyldimethylsilyl-D-(-)-glucal (4a):**  $^1H$  NMR (600 MHz,  $CDCl_3$ ),  $\delta$  0.09 (s, 6H,  $SiCH_3$ ), 0.91 (s, 9H,  $Si-C(CH_3)_3$ ), 2.41 (d,  $J = 5.6$  Hz, 1H,  $C_3$ -OH), 3.67 (dd,  $J = 8.3, 6.3$  Hz, 1H, H-4), 3.85 (dt,  $J = 8.3, 2.6$  Hz, 1H, H-5), 3.95 (br. s, 2H, H-6), 4.28 (br. s, 1H, H-3), 4.70 (dd,  $J = 6.1, 2.2$  Hz, 1H, H-2), 4.78 and 4.80 (AB,  $J = 11.7$  Hz, 2H,  $OCH_2Ph$ ), 6.34 (d,  $J = 6.1$  Hz, 1H, H-1), 7.26 - 7.42 (m, 5H).  $^{13}C$  NMR (151 MHz,  $CDCl_3$ ),  $\delta$  -5.5 (q,  $SiCH_3$ ), -5.2 (q,  $SiCH_3$ ), 25.8 (q,  $SiCH_3$ ), 62.3 (t, C-6), 68.0 (d, C-3), 73.6 (t,  $OCH_2Ph$ ), 77.0 (d, C-4), 77.5 (d, C-5), 102.2 (d, C-2), 127.8, 127.9, 128.5, 138.4, 144.4 (d, C-1); HRMS (FAB), calcd for  $C_{19}H_{29}O_4Si$  ( $M-H^+$ ), 349.1835, found 349.1847.

**4-*O*-Benzyl-D-(-)-glucal (5).** A solution of compound **4b** (16 g, 34 mmol) in anhydrous THF (140 mL) was treated with dropwise addition of tetrabutylammonium fluoride (70 mL, 1.0 M in THF) in an ice-water bath. The stirring was continued at room temperature until the starting material was consumed (4 h). The mixture was cooled again in the ice-water bath and was treated with acetic acid (5 mL) and the solvent was removed in vacuo and the residue was taken up in  $CH_2Cl_2$  (50 mL), washed with aq.  $NaHCO_3$ , and the organic layer was dried over  $MgSO_4$ , filtered, and concentrated. The crude product was crystallized from hexanes/EtOAc (5/1). The crude mother liquids from crystallization were further purified by column chromatography on silica gel using  $Et_2O$  to give the desired product (7.2 g, 90%, combined from recrystallization and column chromatography) as a white solid.  $^1H$  NMR (500 MHz,  $CD_3CN$ )  $\delta$  3.68 (dd,  $J = 9.0, 6.4$  Hz, 1H, H-4), 3.85-4.00 (m, 4H, H-5, H-6, OH), 4.36 (d,  $J = 6.6$  Hz, 1H, H-3), 4.71 (dd,  $J = 6.2, 2.2$  Hz, 1H, H-2), 4.80 and 4.95 (AB,  $J = 11.5$  Hz, 2H,  $OCH_2Ph$ ), 6.33 (d,  $J = 5.8$  Hz, 1H, H-1), 7.32 (m, 5H);  $^{13}C$  NMR (126 MHz, acetone- $d_6$ ),  $\delta$  61.7 (t, C-6), 69.5 (d, C-3), 74.0 (t,  $OCH_2Ph$ ), 77.7 (d, C-4), 78.9 (d, C-5), 104.9 (d, C-2), 128.0, 128.4, 128.9, 139.9, 144.1 (d, C-1).

**1,6-Anhydro-4-*O*-benzyl-2-iodo-2-deoxy- $\beta$ -D-glucopyranose (6).** We used a variation of the procedure of Tailler *et al*<sup>4</sup> for the transformation of compound **5** to **6**. 4-Benzyl-D-glucal (**5**, 2.4 g, 10 mmol) in acetonitrile (30 mL) was mixed with 4 Å molecular sieves (1 g) and  $(Bu_3Sn)_2O$  (4.8 g, 8.0 mmol) and the resulting mixture was refluxed for 2 h. After cooling to room temperature, iodine (3.0 g, 12 mmol) was added in several portions, followed by the addition of propylene oxide (0.6 mL), and the mixture was stirred for 20 h at room temperature. Workup was carried out by filtration and evaporation of the volatile compounds *in vacuo*. The residue was then taken up into EtOAc and the organic phase was treated with aqueous sodium thiosulfate. The organic layer was separated, dried over  $MgSO_4$ , filtered, and the solvent was evaporated to dryness. The crude product was then purified by column chromatography on silica gel using hexanes/ $Et_2O$ , 3/1 to 1/1 to give compound **6** as a white solid (3.3 g,

<sup>4</sup> Tailler, D.; Jacquinet, J. C.; Noirot, A. M.; Beau, J. M. *J. Chem. Soc., Perkin Trans. I* **1992**, 3163-3164.

91%). Crystals were grown from mixed solvents of hexanes and Et<sub>2</sub>O and used for determination of X-ray crystal structure. <sup>1</sup>H NMR (500 MHz, CDCl<sub>3</sub>) δ 2.77 (d, *J* = 6.6 Hz, 1H, OH), 3.43 (t, 1H, H-4), 3.69 (dd, *J* = 7.5, 5.5 Hz, 1H, H-6), 3.93 (m, 1H, H-2), 4.07 (d, *J* = 7.4 Hz, 1H, H-6), 4.26 (m, 1H, H-3), 4.63 and 4.75 (AB, *J* = 12.0 Hz, 2H, OCH<sub>2</sub>Ph), 4.63 (m, 1H, H-5), 5.75 (s, 1H, H-1), 7.40 (m, 5H); <sup>13</sup>C NMR (126 MHz, CDCl<sub>3</sub>) δ 26.4 (d, C-2), 66.3 (t, C-6), 71.5 (t, OCH<sub>2</sub>Ph), 72.6 (d, C-3), 75.1 (d, C-5), 78.6 (d, C-4), 103.5 (d, C-1), 127.8, 127.9, 128.5, 137.4; HRMS (FAB), calcd for C<sub>13</sub>H<sub>16</sub>IO<sub>4</sub> (M+H<sup>+</sup>), 363.0093, found 363.0074.

**4-*O*-Benzyl-1,6:2,3-dianhydro-β-D-mannopyranose (7).** A mixture of compound **6**<sup>4</sup> (3.6 g, 10 mmol) and K<sub>2</sub>CO<sub>3</sub> (1.5 g, 11 mmol) in acetonitrile (150 mL) was stirred for 2 h at 60 °C. The mixture was filtered through a layer of Celite and the residue was washed with acetonitrile. The combined filtrates were evaporated to yield compound **7** (2.0 g, 85%), which was pure by NMR, thus used directly in the next step. Use of Ag<sub>2</sub>CO<sub>3</sub> gave reaction outcome to produce compound **7** in 84%. <sup>1</sup>H NMR (500 MHz, CDCl<sub>3</sub>) δ 3.19 (dt, *J* = 3.8, 0.8 Hz, 1H, H-3), 3.45 (t, *J* = 3.5 Hz, 1H, H-2), 3.65-3.72 (m, 3H, H-5, H-6), 4.51 (dd, *J* = 5.8, 0.8 Hz, 1H, H-4), 4.73 (s, 2H, OCH<sub>2</sub>Ph), 5.71 (d, *J* = 3.2 Hz, 1H, H-1), 7.20-7.39 (m, 5H); <sup>13</sup>C NMR (126 MHz, CDCl<sub>3</sub>) δ 47.7 (d, C-3), 54.3 (d, C-2), 65.7 (t, C-6), 71.5 (d, C-4), 72.1 (t, OCH<sub>2</sub>Ph), 73.6 (d, C-5), 97.5 (d, C-1), 127.8, 128.1, 128.6, 137.2; HRMS (FAB), calcd for C<sub>13</sub>H<sub>13</sub>O<sub>4</sub> (M<sup>+</sup>), 233.0814, found 233.0797.

**1,6:2,3-Dianhydro-β-D-mannopyranose (10).** A mixture of compound **9** (2.7 g, 10 mmol) and Ag<sub>2</sub>CO<sub>3</sub> (2.4 g) in acetonitrile (150 mL) was stirred for 2 h at 60 °C. The mixture was filtered through a layer of Celite and the residue was washed with acetonitrile. The combined filtrates were concentrated and the residue was purified by column chromatography (hexanes/Et<sub>2</sub>O, 1/5, to Et<sub>2</sub>O) to yield compound **10** (1.3 g, 92%). <sup>1</sup>H NMR (500 MHz, CDCl<sub>3</sub>) δ 2.84 (m, 1H, C<sub>(4)</sub>-OH), 3.12 (m, 1H, H-3), 3.43 (t, *J* = 3.5 Hz, 1H, H-2), 3.73 (m, 2H, H-6), 3.90 (s, 1H, H-4), 4.41 (m, 1H, H-5), 5.68 (d, *J* = 3.0 Hz, 1H, H-1); <sup>13</sup>C NMR (126 MHz, CDCl<sub>3</sub>) δ 49.2 (d, C-3), 54.1 (d, C-2), 65.5 (t, C-6), 66.9 (d, C-4), 74.1 (d, C-5), 97.6 (d, C-1); HRMS (FAB), calcd for C<sub>6</sub>H<sub>9</sub>O<sub>4</sub> (M+H<sup>+</sup>), 145.0501, found 145.0481.

**4-*O*-Benzyl-1,6:3,4-dianhydro-β-D-altropyranose (11).** A solution of **10** (4.3 g, 30 mmol) in anhydrous THF (50 mL) was treated with NaH (1.2 g, 30 mmol, 60% in oil), which was added in two portions under vigorous stirring. The resulting mixture was stirred at room temperature for 30 min, followed by dropwise addition of benzyl bromide (3.6 mL, 30 mmol). After stirring at room temperature for 1 h, the volume of the reaction was reduced and a portion of hexanes was added to the solution. The layers were separated and the bottom layer was concentrated in vacuo to dryness. The residue was purified by column chromatography on silica gel (hexanes/Et<sub>2</sub>O, 1/1 to Et<sub>2</sub>O), to afford the desired

product as a colorless oil, which crystallized on standing (6.0 g, 85%).  $^1\text{H}$  NMR (500 MHz,  $\text{CDCl}_3$ )  $\delta$  3.05 (dd,  $J = 4.0, 2.4$  Hz, 1H, H-3), 3.10 (d,  $J = 4.0$  Hz, 1H, H-4), 3.62 (d,  $J = 2.8$  Hz, 1H, H-2), 3.85 (dd,  $J = 7.4, 4.4$  Hz, 1H, H-6a), 4.10 (d,  $J = 7.6$  Hz, 1H, H-6b), 4.65 and 4.73 (AB, d,  $J = 12.2$  Hz, 2H,  $\text{OCH}_2\text{Ph}$ ), 4.67 (m, 1H, H-5), 5.31 (t,  $J = 2.6$  Hz, 1H, H-1), 7.29 - 7.38 (m, 5H);  $^{13}\text{C}$  NMR (126 MHz,  $\text{CDCl}_3$ )  $\delta$  49.5 (d, C-3), 50.0 (d, C-4), 67.2 (t, C-6), 69.8 (d, C-5), 71.9 (t,  $\text{OCH}_2\text{Ph}$ ), 72.0 (d, C-2), 98.0 (d, C-1), 127.9, 128.0, 128.4, 137.0; HRMS (FAB), calcd for  $\text{C}_{13}\text{H}_{13}\text{O}_4$  ( $\text{M}^+$ ), 233.0814, found 233.0818.

**1,6-Anhydro-2-azido-4-*O*-benzyl-2-deoxy- $\beta$ -D-glucopyranose (8).**  $\text{TMSN}_3$  (4.0 mL, 33 mmol) and  $\text{BF}_3 \cdot \text{Et}_2\text{O}$  (5.7 mL, 45 mmol) were added to a stirred solution of epoxide **7** (2.3 g, 10 mmol) in anhydrous  $\text{CH}_2\text{Cl}_2$  (80 mL). The resultant solution was stirred 20 h at room temperature, then was heated under reflux for 1.5 h. The mixture was poured into saturated  $\text{K}_2\text{CO}_3$  in ice-water bath. Layers were separated and the aqueous phase was extracted with  $\text{CH}_2\text{Cl}_2$ . The combined organic layer was dried over  $\text{Na}_2\text{SO}_4$ , filtered and the solvent was evaporated. Column chromatography on silica gel eluting with  $\text{Et}_2\text{O}$  afforded compound **8** (1.9 g, 70%) as a yellow oil, which solidified on standing. The product was recrystallized from  $\text{Et}_2\text{O}$ :hexanes.  $^1\text{H}$  NMR (500 MHz,  $\text{CDCl}_3$ )  $\delta$  2.47 (br. s, 1H,  $\text{C}_{(3)}\text{-OH}$ ), 3.24 (d,  $J = 3.2$  Hz, 1H, H-2), 3.39 (m, 1H, H-4), 3.70 (dd,  $J = 7.1, 5.7$  Hz, 1H, H-6a), 3.90 (t,  $J = 3.2$  Hz, 1H, H-3), 3.95 (d,  $J = 7.6$  Hz, 1H, H-6b), 4.62 (d,  $J = 5.4$  Hz, 1H, H-5), 4.69 (s, 2H,  $\text{OCH}_2\text{Ph}$ ), 5.48 (s, 1H, H-1), 7.30 - 7.41 (m, 5H);  $^{13}\text{C}$  NMR (126 MHz,  $\text{CDCl}_3$ )  $\delta$  62.6 (d, C-2), 66.2 (t, C-6), 70.3 (d, C-3), 71.8 (t,  $\text{OCH}_2\text{Ph}$ ), 75.0 (d, C-5), 78.4 (d, C-4), 101.0 (d, C-1), 127.9, 128.1, 128.6, 137.3; HRMS (FAB), calcd for  $\text{C}_{13}\text{H}_{14}\text{N}_3\text{O}_4$  ( $\text{M}-\text{H}^+$ ), 276.0984, found 276.1000.

**2-Acetamido-1,6-anhydro-4-*O*-benzyl-2-deoxy- $\beta$ -D-glucopyranose (12).** Compound **8** (1.0 g, 3.6 mmol) was dissolved in MeOH (10 mL) and 5% Pd/C (0.1 g) was added, and the reaction mixture was stirred vigorously under a hydrogen atmosphere at room temperature for 1 h. The reaction mixture was filtered through a layer of Celite and was washed with MeOH. The combined filtrate was evaporated to dryness and the residues was dissolved in  $\text{CH}_2\text{Cl}_2$  (10 mL). Acetic anhydride (7 mL) and pyridine (5 mL) were added to the solution, which was allowed to stir for 20 h at room temperature. The solution was evaporated to dryness and the residue was dissolved in  $\text{CH}_2\text{Cl}_2$  and was washed with water. The organic layer was dried over  $\text{MgSO}_4$ , filtered, concentrated to dryness and the crude product was subjected to column chromatography to afford the desired compound (1.0 g, 85% from compound **8**).  $^1\text{H}$  NMR (600 MHz,  $\text{CDCl}_3$ )  $\delta$  1.90 (s, 3H), 2.06 (s, 3H), 3.30 (s, 1H, H-4), 3.73 (dd,  $J = 7.2, 6.1$  Hz, 1H, H-6a), 3.96 (d,  $J = 7.7$  Hz, 1H, H-6b), 4.10 (d,  $J = 9.7$  Hz, 1H, H-2), 4.52 (d,  $J = 5.5$  Hz, 1H, H-5), 4.68 and 4.75 (AB,  $J = 12.1$  Hz, 2H,  $\text{OCH}_2\text{Ph}$ ), 4.81 (s, 1H, H-3), 5.31 (s, 1H, H-1), 6.12 (d,  $J = 9.7$  Hz, 1H, NH), 7.29-7.36 (m, 5H);  $^{13}\text{C}$  NMR (151 MHz,  $\text{CDCl}_3$ )  $\delta$  21.2 (q), 23.3 (q), 48.9 (d, C-2), 65.3 (t, C-6),

69.7 (d, C-3), 71.5 (t, OCH<sub>2</sub>Ph), 74.1 (d, C-4), 74.4 (d, C-5), 100.4 (d, C-1), 128.1, 128.3, 128.7, 137.4, 169.3 (C=O), 169.9 (C=O); HRMS (FAB), calcd for C<sub>17</sub>H<sub>22</sub>NO<sub>6</sub> (M+H<sup>+</sup>), 336.1447, found 336.1453.

**2-Acetamido-1,6-anhydro-2-deoxy-β-D-glucopyranose (13).** Compound **12** (1.0 g, 3.0 mmol) in MeOH (10 mL) was stirred in the presence of 10% Pd/C (0.15 g) at 55 °C in an atmosphere of hydrogen for 4 h. The reaction mixture was filtered through a layer of Celite and the residue was washed with MeOH. Concentration of the combined filtrate provided the desired product (0.66 g, 90%). <sup>1</sup>H NMR (500 MHz, CDCl<sub>3</sub>) δ 1.94 (s, 3H), 2.01 (s, 3H), 3.54 (d, *J* = 1.2 Hz, 1H, H-4), 3.70 (dd, *J* = 7.5, 5.9 Hz, 1H, H-6a), 3.92 (d, *J* = 8.6 Hz, 1H, H-2), 4.00 (d, *J* = 7.2 Hz, 1H, H-6b), 4.48 (d, *J* = 5.6 Hz, 1H, H-5), 4.57 (m, 1H, H-3), 5.25 (s, 1H, H-1), 6.87 (d, *J* = 9.6 Hz, 1H, NH); <sup>13</sup>C NMR (126 MHz, CDCl<sub>3</sub>) δ 21.1 (q), 22.9 (q), 49.1 (d, C-2), 65.1 (t, C-6), 68.3 (d, C-4), 72.3 (d, C-3), 75.8 (d, C-5), 100.4 (d, C-1), 170.0 (C=O), 170.5 (C=O); HRMS (FAB), calcd for C<sub>10</sub>H<sub>16</sub>NO<sub>6</sub> (M+H<sup>+</sup>), 246.0978, found 246.0974.

**2-Acetamido-1,6-anhydro-2-deoxy-3-O-[(1*R*)-1-carboxyethyl]-β-D-glucopyranose (14).** To a stirred solution of compound **8** (1.4 g, 5.0 mmol) in anhydrous dioxane (25 mL) was added NaH (1.3 g, 33 mmol, 60% in oil). The mixture was kept for 10 min at 45 °C, and then the temperature was decreased to room temperature. (*S*)-2-Chloropropionic acid (1.3 g, 12 mmol) was added and the stirring was continued for 2 h at 90 °C, at which point the organic solvent was evaporated to dryness. A 50 mL portion of water was carefully added to the residue to decompose the excess of sodium hydride. The solution was extracted once with hexanes/EtOAc (1:1) to remove the mineral oil and it was filtered over a layer of charcoal. The solution was acidified in ice-water temperature with 2.5 M hydrochloric acid until pH 3 was reached, and the resulting precipitate was immediately extracted with a few portions of CH<sub>2</sub>Cl<sub>2</sub>. The CH<sub>2</sub>Cl<sub>2</sub> extracts were washed with water, rapidly dried over sodium sulfate, followed by evaporation to dryness. The residue was chromatographed on silica column, using CHCl<sub>3</sub>/acetone (3/1) to provide 1,6-anhydro-2-azido-4-*O*-benzyl-2-deoxy-3-*O*-[(1*R*)-1-carboxyethyl]-β-D-glucopyranose. (1.2 g, 69%). <sup>1</sup>H NMR (500 MHz, CDCl<sub>3</sub>) δ 1.39 (d, *J* = 6.8 Hz, 3H), 3.32 (s, 1H, H-4), 3.46 (s, 1H, H-2), 3.59 (s, 1H, H-3), 3.72 (t, *J* = 6.5 Hz, 1H, H-6a), 3.85 - 4.02 (m, 2H, H-6b, Lac-α-H), 4.65 and 4.72 (AB, *J* = 12.0 Hz, 2H, OCH<sub>2</sub>Ph), 4.65 (br. s., 1H, H-5), 5.49 (s, 1H, H-1), 7.26 - 7.41 (m, 5H); <sup>13</sup>C NMR (126 MHz, CDCl<sub>3</sub>) δ 18.4 (q), 60.3 (d, C-2), 65.3 (t, C-6), 71.6 (t, OCH<sub>2</sub>Ph), 74.1 (d, C-5), 74.3 (d, Lac-α-C), 75.4 (d, C-4), 77.1 (d, C-3), 100.4 (d, C-1), 127.9, 128.2, 128.6, 137.0, 177.1 (C=O); HRMS (FAB), calcd for C<sub>16</sub>H<sub>20</sub>N<sub>3</sub>O<sub>6</sub> (M+H<sup>+</sup>), 350.1352, found 350.1353.

The sample obtained above (1.2 g, 3.4 mmol) was dissolved in MeOH (20 mL) and 5% Pd/C (0.12 g) was added and the mixture was stirred vigorously under an atmosphere of hydrogen at room temperature for 1 h. The mixture was filtered through a layer of Celite and the residue was washed with

MeOH. The combined filtrate was concentrated to dryness and the residue was dissolved in CH<sub>2</sub>Cl<sub>2</sub> (10 mL). The mixture was treated with acetic anhydride (10 mL) and was allowed to stir for 20 h at room temperature. Volatiles were removed *in vacuo* and the resultant crude compound was taken up into a mixture of CH<sub>2</sub>Cl<sub>2</sub> and water. The solution was stirred for 1 h and layers were separated. The organic layer was dried over MgSO<sub>4</sub>, filtered, and concentrated to dryness and the residue was subjected to column chromatography to afford 2-acetamido-1,6-anhydro-4-*O*-benzyl-2-deoxy-3-*O*-[(1*R*)-1-carboxyethyl]-β-D-glucopyranose (1.1 g, 85%). 2-amido-1,6-anhydro-4-*O*-benzyl-2-deoxy-3-*O*-[(1*R*)-1-carboxyethyl]-β-D-glucopyranose: <sup>1</sup>H NMR (500 MHz, CD<sub>3</sub>OD) δ 1.34 (d, *J* = 7.0 Hz, 3H, Lac-β-CH<sub>3</sub>), 3.16 (d, *J* = 6.8 Hz, 1H, H-2), 3.48 (t, *J* = 6.3 Hz, 1H, H-3), 3.55 (d, *J* = 5.6 Hz, 1H, H-4), 3.67 (dd, *J* = 7.4, 5.4 Hz, 1H, H-6a), 3.90 (d, *J* = 7.4 Hz, 1H, H-6b), 4.24 (q, *J* = 6.8 Hz, 1H, Lac-α-H), 4.62 and 4.74 (2d, *J* = 11.8 Hz, 2H, OCH<sub>2</sub>Ph), 4.69 (d, *J* = 5.2 Hz, 1H, H-5), 5.17 (br. s, 2H, NH<sub>2</sub>), 5.54 (s, 1H, H-1), 7.30 - 7.46 (m, 5H); <sup>13</sup>C NMR (126 MHz, CD<sub>3</sub>OD) δ 20.2 (q), 56.9 (d, C-2), 68.4 (t, C-6), 72.8 (t, OCH<sub>2</sub>Ph), 77.2 (2d, C-3 and C-5), 79.0 (d, Lac-α-C), 82.3 (d, C-4), 100.7 (d, C-1), 129.2, 129.5, 129.8, 139.0, 181.5 (C=O); HRMS (FAB), calcd for C<sub>16</sub>H<sub>22</sub>NO<sub>6</sub> (M+H<sup>+</sup>), 324.1447, found 324.1457. 2-acetamido-1,6-anhydro-4-*O*-benzyl-2-deoxy-3-*O*-[(1*R*)-1-carboxyethyl]-β-D-glucopyranose: <sup>1</sup>H NMR (500 MHz, CDCl<sub>3</sub>) δ 1.41 (d, *J* = 6.8 Hz, 3H, Lac-β-CH<sub>3</sub>), 1.96 (s, 3H), 3.47 and 3.56 (2s, 2H, H-3 and H-4), 3.56 (s, 1H, H-3), 3.77 (dd, *J* = 7.2, 5.8 Hz, 1H, H-6a), 4.11 (d, *J* = 9.0 Hz, 1H, H-2), 4.16 (d, *J* = 7.6 Hz, 1H, H-6b), 4.25 (q, *J* = 6.9 Hz, 1H, Lac-α-H), 4.61 and 4.69 (AB, *J* = 11.8 Hz, 2H, OCH<sub>2</sub>Ph), 4.65 (d, *J* = 5.4 Hz, 1H, H-5), 5.44 (s, 1H, H-1), 6.39 (d, *J* = 9.0 Hz, 1H, NH), 7.29 - 7.40 (m, 5H); <sup>13</sup>C NMR (126 MHz, CDCl<sub>3</sub>) δ 17.6 (q), 22.8 (q), 48.2 (d, C-2), 65.3 (t, C-6), 71.5 (t, OCH<sub>2</sub>Ph), 74.1 (d, C-5), 74.2 (d, Lac-α-C), 75.7 and 75.9 (2d, C-3 and C-4), 100.6 (d, C-1), 127.7, 128.2, 128.6, 136.9, 170.3 (C=O), 173.7 (C=O); HRMS (FAB), calcd for C<sub>18</sub>H<sub>24</sub>NO<sub>7</sub> (M+H<sup>+</sup>), 360.1553, found 360.1555.

The above compound (1.0 g, 2.7 mmol) was dissolved in MeOH (10 mL) and the solution was stirred in the presence of 10% Pd/C (0.15 g) at 55 °C under an atmosphere of hydrogen for 4 h. The mixture was filtered through a layer of Celite and the residue was washed with MeOH. Concentration of the combined filtrate provided compound **14** (0.69 g, 92%). <sup>1</sup>H NMR (500 MHz, CD<sub>3</sub>CN) δ 1.37 (d, *J* = 6.8 Hz, 3H, Lac-β-CH<sub>3</sub>), 1.93 (s, 3H), 3.37 (s, 1H, H-3), 3.67 (m, 2H, H-4 and H-6a), 3.90 (d, *J* = 8.4 Hz, 1H, H-2), 4.11 (d, *J* = 7.4 Hz, 1H, H-6b), 4.24 (q, *J* = 6.8 Hz, 1H, Lac-α-H), 4.50 (d, *J* = 5.2 Hz, 1H, H-5), 5.31 (s, 1H, H-1), 6.79 (d, *J* = 8.6 Hz, 1H, NH); <sup>13</sup>C NMR (126 MHz, CD<sub>3</sub>CN) δ 18.8 (q), 23.1 (q), 50.6 (d, C-2), 66.2 (t, C-6), 69.8 (d, C-4), 74.9 (d, Lac-α-C), 77.2 (d, C-5), 79.9 (d, C-3), 101.6 (d, C-1), 171.4 (C=O), 175.1 (C=O); HRMS (FAB), calcd for C<sub>18</sub>H<sub>24</sub>NO<sub>7</sub> (M+H<sup>+</sup>), 366.1553, found 366.1547.

**3,4,6-tri-*O*-Acetyl-2-deoxy-2-(2,2,2-trichloroethoxycarbonylamino)- $\beta$ -D-glucopyranosyl-(1 $\rightarrow$ 4)-2-acetamido-1,6-anhydro-2-deoxy-3-*O*-[(1*R*)-1-carboxyethyl]- $\beta$ -D-glucopyranose (20).** Compounds **16**<sup>5</sup> (1.5 g, 2.4 mmol) and **14** (0.55 g, 2.0 mmol) were dissolved in anhydrous CH<sub>2</sub>Cl<sub>2</sub> (15 mL) and acetonitrile (5 mL), 4-Å activated molecular sieves (1 g) were added, and the suspension was stirred under argon for 2 h. The catalyst TfOH (0.3 mL) was added in two portions, and the solution was stirred at room temperature for 1 h. The reaction was quenched by the addition of triethylamine (0.3 mL) and it was filtered through a layer of Celite. The combined filtrate was concentrated to dryness and the residue was purified by flash chromatography (CH<sub>3</sub>Cl/acetone/MeOH, 6:2:0.05) to give **20** (0.77 g) in 52% and **23** (0.38 g) in 26%. **Compound 20:** <sup>1</sup>H NMR (500 MHz, CD<sub>3</sub>CN)  $\delta$  1.33 (d, *J* = 6.8 Hz, 3H), 1.91 (s, 3H), 1.94 (s, 3H), 1.98 (s, 3H), 2.01 (s, 3H), 3.08 - 3.18 (m, 2H), 3.23 (s, 1H), 3.55 (d, *J* = 5.0 Hz, 1H), 3.60 (d, *J* = 3.8 Hz, 1H), 3.63 (t, *J* = 6.5 Hz, 1H), 3.78 (dd, *J* = 19.3, 9.0 Hz, 1H), 3.90 (d, *J* = 9.8 Hz, 1H), 3.94 - 4.00 (m, 1H), 4.01 - 4.12 (m, 2H), 4.18 - 4.32 (m, 2H), 4.45 (d, *J* = 5.4 Hz, 1H), 4.59 (d, *J* = 12.2 Hz, 1H), 4.87 (d, *J* = 12.2 Hz, 1H), 5.05 (t, *J* = 9.8 Hz, 1H), 5.21 (s, 1H), 5.37 (t, *J* = 10.1 Hz, 1H), 5.92 (d, *J* = 8.8 Hz, 1H), 6.55 (d, *J* = 9.0 Hz, 1H), 6.71 (d, *J* = 9.0 Hz, 1H); <sup>13</sup>C NMR (75 MHz, CDCl<sub>3</sub>)  $\delta$  8.5, 18.2, 20.4, 20.5, 22.9, 46.7, 50.2, 54.8, 61.5, 68.1, 68.4, 71.8, 72.3, 74.1, 75.8, 78.5, 92.0, 95.4, 100.5, 154.3, 169.4, 170.2, 170.7, 171.3. **Compound 23:** <sup>1</sup>H NMR (500 MHz, CD<sub>3</sub>OD)  $\delta$  1.37 (d, *J* = 7.0 Hz, 3H), 1.98 (s, 3H), 1.99 (s, 3H), 2.01 (s, 3H), 2.04 (s, 3H), 3.35 (s, 1H), 3.63 (s, 1H), 3.68 (m, *J* = 12.6 Hz, 1H), 3.83 (dd, *J* = 10.5, 8.9 Hz, 1H), 3.92 - 4.00 (m, 2H), 4.08 - 4.15 (m, 2H), 4.28 - 4.33 (m, 1H), 4.36 (q, *J* = 6.9 Hz, 1H), 4.49 (d, *J* = 5.6 Hz, 1H), 4.64 and 4.88 (AB, *J* = 12.2 Hz, 2H), 5.05 (t, *J* = 9.7 Hz, 1H), 5.27 (s, 1H), 5.34 (m, *J* = 19.7 Hz, 1H), 5.85 (d, *J* = 8.8 Hz, 1H); <sup>13</sup>C NMR (126 MHz, CD<sub>3</sub>OD)  $\delta$  18.8, 20.7, 20.8, 22.9, 26.4, 52.2, 56.3, 63.0, 66.5, 69.8, 70.4, 73.7, 74.0, 74.9, 75.6, 77.8, 80.3, 93.7, 102.2, 156.5, 171.4, 171.7, 172.4, 172.5, 172.7; HRMS (FAB), calcd for C<sub>26</sub>H<sub>36</sub>Cl<sub>3</sub>N<sub>2</sub>O<sub>16</sub> (M+H<sup>+</sup>), 737.1130, found 737.1118.

***tert*-Butyldimethylsilyl 3,4,6-tri-*O*-benzyl-2-dimethylmaleimido-2-deoxy- $\beta$ -D-glycopyranoside (25).** Two methods were used.

**Method A.** A solution of compound **24**<sup>6</sup> (4.5 g, 10 mmol) in anhydrous CH<sub>3</sub>CN (120 mL), was treated with NaH (1.6 g, 40 mmol, 60% in oil), in three portions under vigorous stirring in an ice-water bath. The resulting mixture was stirred at room temperature for 30 min, followed by dropwise addition of a solution of benzyl bromide (5.0 mL, 41 mmol) in CH<sub>3</sub>CN (10 mL), and the resulted mixture was stirred for an additional 1 h at room temperature. After stirring at 35 °C for 24 h, the solution was cooled and

<sup>5</sup> Dullenkopf, W.; Castro-Palomino, J. C.; Manzonei, L.; Schmidt, R. R., Carbohydr. Res. 1996, 296, 135-147.

<sup>6</sup> Aly, M. R. E.; Castro-Palomino, J. C.; Ibrahim, E. S. I.; El-Ashry, E. S. H.; Schmidt, R. R., Eur. J. Org. Chem. 1998, 2305-2316.

the reaction was quenched with Amberlite 120 ( $H^+$ ). After filtration, the solvent was removed under reduced pressure and the residue was carefully diluted with water, neutralized with AcOH (10%), and extracted with EtOAc. The combined organic solution was washed with water, dried over  $MgSO_4$ , filtered, and was evaporated to dryness under reduced pressure. The residue was chromatographed on silica gel using a gradient elution of 20% - 95%  $Et_2O$  in hexanes to provide the desired compound in 25% (1.6 g).  $^1H$  NMR (600 MHz,  $CDCl_3$ )  $\delta$  -0.04 and 0.07 (2×s, 6H,  $SiCH_3$ ), 0.76 (s, 9H,  $Si-C(CH_3)_3$ ), 1.34 (s, 6H), 3.60 (m, 1H), 3.73 (m, 3H), 3.91 (dd,  $J$  = 10.8, 8.2 Hz, 1H), 4.25 (dd,  $J$  = 10.8, 8.8 Hz, 1H), 4.46 (d,  $J$  = 12.3 Hz, 1H), 4.59 (m, 1H), 4.66 (m, 2H), 4.84 (t,  $J$  = 11.9 Hz, 2H), 5.18 (d,  $J$  = 8.2 Hz, 1H), 7.14-7.31 (m, Ar-H, 15H);  $^{13}C$  NMR (151 MHz,  $CDCl_3$ )  $\delta$  -5.6, -4.1, 8.6, 22.7, 25.4, 57.8, 68.9, 73.4, 74.6, 74.9, 75.0, 79.6, 79.6, 93.4, 127.3, 127.5, 127.6, 127.8, 127.9, 128.0, 128.2, 128.3, 128.4, 138.1, 138.6, 172.1.

**Method B.** This procedure was carried out under scrupulously dry condition. To a solution of **24** (4.5 g, 10 mmol) in anhydrous  $CH_2Cl_2$  (120 mL) and anhydrous n-Hexane (120 mL) were added benzyl 2,2,2-trichloroacetimidate (11 mL, 60 mmol) and activated 4-Å molecular sieves (10 g), and the mixture was stirred at room temperature for 0.5 h. Then, the mixture was cooled in an ice-water bath, and a catalytic amount of trifluoromethanesulfonic acid was added dropwise ( $2 \times 0.8$  mL). The reaction was monitored by TLC. When the starting material was consumed completely (approximately 3 h), the reaction was quenched by addition of  $Et_3N$  (2 mL) and additional cyclohexane (20 mL) was added. After the mixture was stirred for 0.5 h at room temperature, 2,2,2-trichloroacetamide was filtered and washed with hexanes/EtOAc (4/1). The filtrate was concentrated to dryness, and the residue was chromatographed (hexane to hexanes/ $Et_2O$ , 8/1) to give **25** as a viscous colorless oil (3.7 g, 56%).

**3,4,6-tri-*O*-Benzyl-2-dimethylmaleimido-2-deoxy- $\beta$ -D-glycopyranosyl-(1→4)-1,6:2,3-dianhydro- $\beta$ -D-mannopyranose (**21**).** Compound **25** (3.4 g, 5.0 mmol) in dry THF (40 mL) was treated by the dropwise addition of tetrabutylammonium fluoride (6.3 mL, 1.0 M in THF) at room temperature. The mixture was stirred until starting material was consumed (4 h). Subsequently, acetic acid (0.4 mL) was added, and the solvent was removed in vacuo, the residue was taken up in  $CH_2Cl_2$  (50 mL) and washed with satd  $NaHCO_3$ , and the organic layer was dried over anhydrous  $MgSO_4$ , filtered, and concentrated. The crude product was chromatographed (hexane/ $Et_2O$ , 4/1) to give 3,4,6-tri-*O*-benzyl-2-dimethylmaleimido-2-deoxy- $\beta$ -D-glycopyranose in 77% yield (2.1 g).  $^1H$  NMR (500 MHz,  $CDCl_3$ )  $\delta$  1.79 (br. s., 6H), 3.70 (m, 3H), 3.90 (dd,  $J$  = 10.8, 8.6 Hz, 1H), 4.29 (dd,  $J$  = 10.8, 8.2 Hz, 1H), 4.40-4.60 (m, 6H), 4.83 (dd,  $J$  = 11.6, 8.6 Hz, 1H), 5.21 (d,  $J$  = 8.6 Hz, 1H), 7.12-7.27 (m, 15H).  $^{13}C$  NMR (126 MHz,  $CDCl_3$ )  $\delta$  15.2, 57.3, 65.2, 65.8, 68.5, 73.4, 74.7, 74.8, 76.7, 79.3, 92.9, 127.3, 127.7, 127.8, 127.9, 128.2, 128.4, 128.9, 137.7, 137.8, 173.2.

Sample obtained above (1.1 g, 2.0 mmol) in anhydrous CH<sub>2</sub>Cl<sub>2</sub> (20 mL) was treated with 2,2,2-trichloroacetonitrile (0.5 mL, 25 mmol) and a catalytic amount of DBU. When the starting material was consumed completely (2 h), the reaction mixture was filtered through a small layer of silica gel, which was washed with CH<sub>2</sub>Cl<sub>2</sub>. The filtrate was concentrated under scrupulously dry conditions, and the residue (compound **17**) was kept under high vacuum for 0.5 h over P<sub>2</sub>O<sub>5</sub>. Derivative **17** was introduced into the next reaction step without further purification. Glycosylation of compounds **10** and **17** was carried out under the same condition for preparation of compound **20** to give compound **21** in 85%. <sup>1</sup>H NMR (500 MHz, CDCl<sub>3</sub>) δ 1.79 (br. s., 6H), 3.27 (d, *J* = 3.1 Hz, 1H), 3.35 (m, 1H), 3.57 - 3.66 (m, 3H), 3.71 - 3.81 (m, 3H), 3.86 (s, 1H), 4.01 (dd, *J* = 10.7, 8.5 Hz, 1H), 4.11 - 4.19 (m, 2H), 4.44 (d, *J* = 12.1 Hz, 1H), 4.54 - 4.68 (m, 3H), 4.80 - 4.87 (m, 2H), 5.26 (d, *J* = 8.4 Hz, 1H), 5.59 (d, *J* = 2.9 Hz, 1H), 7.08 - 7.39 (m, 15H); <sup>13</sup>C NMR (151 MHz, CDCl<sub>3</sub>) δ 8.6 (q), 48.2 (d), 54.2 (d), 55.4 (d), 65.4 (t), 68.3 (t), 71.4 (d), 73.3 (d and t), 74.8 (t), 74.9 (t), 75.0 (d), 79.1 (d), 79.6 (d), 97.3 (d), 97.5 (d), 127.3, 127.6, 127.9, 128.0, 128.2, 128.3, 137.7, 138.1, 171.6; MS (FAB) [*M*-H<sup>+</sup>] 682.

**Introduction of Azide.** TMSN<sub>3</sub> (0.8 mL, 6.6 mmol) and BF<sub>3</sub>·Et<sub>2</sub>O (1.1 mL, 9.0 mmol) were added to a stirred solution of epoxide **21** (1.37 g, 2.0 mmol) in anhydrous CH<sub>2</sub>Cl<sub>2</sub> (15 mL). The resultant solution was stirred 20 h at room temperature, then was heated under reflux for 1.5 h. The mixture was poured into saturated K<sub>2</sub>CO<sub>3</sub> in ice-water bath. Layers were separated and the aqueous phase was extracted with CH<sub>2</sub>Cl<sub>2</sub>. The combined organic layer was dried over Na<sub>2</sub>SO<sub>4</sub>, filtered and the solvent was evaporated. Column chromatography on silica gel afforded compound **27** (0.82 g, 70%) as a major product along with compounds **28a** and **28b** (positions of N<sub>3</sub> group in compounds **28a** and **28b** were not assigned). <sup>1</sup>H NMR (500 MHz, CDCl<sub>3</sub>) δ 1.83 (br. s., 6H), 3.66 - 3.86 (m, 3H), 3.88 - 4.06 (m, 2H), 4.29 (dd, *J* = 10.5, 8.7 Hz, 1H), 4.41 - 4.92 (m, 6H), 5.26 (d, *J* = 9.4 Hz, 1H), 7.12 - 7.50 (m, 15H); <sup>13</sup>C NMR (126 MHz, CDCl<sub>3</sub>) δ 9.0 (q), 55.4 (d), 68.4 (t), 73.8 (t), 75.2 (t), 75.3 (t), 77.4 (d), 79.2 (d), 79.8 (d), 86.0 (d), 127.7, 128.0, 128.1, 128.2, 128.6, 128.7, 138.0, 138.1, 138.5, 171.5; HRMS (FAB), calcd for C<sub>33</sub>H<sub>33</sub>N<sub>4</sub>O<sub>6</sub> (*M*-H<sup>+</sup>), 581.2400, found 581.2407. **Compound 28a:** <sup>1</sup>H NMR (300 MHz, CDCl<sub>3</sub>) δ 1.74 (br. s., 6H), 3.17 (d, *J* = 6.6 Hz, 1H), 3.32 (d, *J* = 5.5 Hz, 1H), 3.37 - 3.75 (m, 6H), 3.93 (dd, *J* = 10.9, 8.1 Hz, 1H), 4.01 - 4.21 (m, 3H), 4.31 - 4.82 (m, 6H), 5.11 (d, *J* = 8.6 Hz, 1H), 5.18 (s, 1H), 6.96 - 7.37 (m, 15H); <sup>13</sup>C NMR (75 MHz, CDCl<sub>3</sub>) δ 8.9, 55.7, 65.3, 67.3, 68.9, 72.7, 73.7, 74.8, 75.2, 76.3, 79.8, 80.1, 85.1, 98.6, 102.0, 127.7, 128.1, 128.3, 128.5, 128.7, 137.5, 137.6, 138.3 ; MS (FAB) [*M*-H<sup>+</sup>] 725. **Compound 28b:** <sup>1</sup>H NMR (500 MHz, CDCl<sub>3</sub>) δ 1.80 (br. s., 6H), 3.23 (d, *J* = 6.6 Hz, 1H), 3.38 (d, *J* = 5.4 Hz, 1H), 3.48 (dd, *J* = 10.1, 7.5 Hz, 1H), 3.53 (t, *J* = 9.4 Hz, 1H), 3.60 (dd, *J* = 7.6, 5.6 Hz, 1H), 3.64 - 3.78 (m, 4H), 3.99 (dd, *J* = 10.6, 8.6 Hz, 1H), 4.12 (dd, *J* = 10.7, 8.7 Hz, 1H), 4.16 - 4.26 (m, 1H), 4.38 - 4.59 (m, 4H), 4.82 (dd, *J* = 11.6, 6.2 Hz, 2H), 5.17 (d, *J* = 8.4 Hz, 1H), 5.24 (s, 1H), 7.05 - 7.41

(m, 15H);  $^{13}\text{C}$  NMR (126 MHz,  $\text{CDCl}_3$ )  $\delta$  8.9 (q), 55.7, 65.2 (d), 67.3 (t), 68.8 (t), 72.7 (d), 73.7 (t), 74.8 (d), 75.2 (t), 75.2 (d), 76.3 (d), 79.8 (d), 80.1 (d), 85.1 (d), 98.6 (d), 102.0, 127.7, 128.1, 128.3, 128.4, 128.6, 128.7, 137.5, 137.6, 138.3, 171.9; MS (FAB)  $[\text{M}-\text{H}^+]$  725.

**Azido 3,4,6-tri-*O*-acetyl-2-dimethylmaleimido-2-deoxy- $\beta$ -D-glycopyranoside (30).** Compound **29** was subjected to the same condition described for compound **27** to give compound **30** in 80%.  $^1\text{H}$  NMR (500 MHz,  $\text{CDCl}_3$ )  $\delta$  1.83 (s, 3H), 1.89 (s, 9H), 1.94 (s, 3H), 2.02 (s, 3H), 3.85 (ddd,  $J = 10.2, 4.6, 2.3$  Hz, 1H, H-5), 3.91 (dd,  $J = 10.6, 9.6$  Hz, 1H, H-2), 4.09 (dd,  $J = 12.4, 2.2$  Hz, 1H, H-6), 4.24 (dd,  $J = 12.5, 4.7$  Hz, 1H, H-6), 5.05 (t,  $J = 9.8$  Hz, 1H, H-4), 5.41 (d,  $J = 9.4$  Hz, 1H, H-1), 5.54 (dd,  $J = 10.6, 9.2$  Hz, 1H, H-3);  $^{13}\text{C}$  NMR (126 MHz,  $\text{CDCl}_3$ )  $\delta$  8.8 (q), 20.4 (q), 20.6 (q), 20.7 (q), 53.8 (d, C-2), 61.7 (t, C-6), 68.4 (d, C-4), 70.5 (d, C-3), 73.9 (d, C-5), 85.6 (d, C-1), 169.4, 170.0, 170.6; HRMS (FAB), calcd for  $\text{C}_{18}\text{H}_{22}\text{NO}_9$  ( $\text{M}-\text{N}_3^+$ ), 396.1295, found 396.1312.

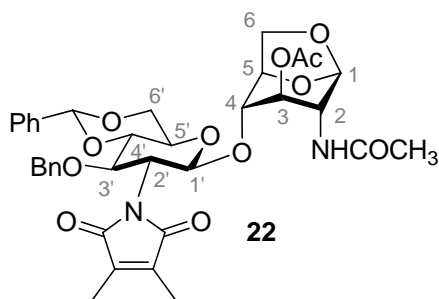

**3-*O*-Benzyl-4,6-*O*-benzylidene-2-deoxy-2-dimethylmaleimido- $\beta$ -D-glucopyranosyl-(1 $\rightarrow$ 4)-2-acetamido-1,6-anhydro-2-deoxy- $\beta$ -D-glucopyranose (22).** Compounds **13** (1.2 g, 5.0 mmol) and **18**<sup>7</sup> (3.4 g, 5.5 mmol) were dissolved in anhydrous  $\text{CH}_2\text{Cl}_2$  (50 mL), 4-Å molecular sieves (5 g) was added, and the suspension was stirred under argon for 2 h. The catalyst TfOH (0.5 mL) was added in two portions, and the solution was stirred at room temperature for 1 h. The reaction was quenched by adding triethylamine (0.1 mL) and it was filtered through a layer of Celite. The combined filtrate was concentrated to dryness and the residue was purified by flash chromatography ( $\text{CH}_2\text{Cl}_2/\text{MeCN}/\text{MeOH}$ , 10:3:0.5) to give **22** (2.6 g) in 75%.  $^1\text{H}$  NMR (500 MHz,  $\text{CDCl}_3$ )  $\delta$  1.84 (br. s, 6H), 2.05 (s, 3H), 2.11 (s, 3H), 3.57 (td,  $J = 9.8, 5.0$  Hz, 1H, H-5'), 3.63 (br. s, 1H, H-4), 3.65 (dd,  $J = 7.6, 5.8$  Hz, 1H, H-6a), 3.78 (t,  $J = 9.2$  Hz, 1H, H-4'), 3.83 (t,  $J = 10.4$  Hz, 1H, H-6'a), 3.99 (d,  $J = 7.4$  Hz, 1H, H-6b), 4.03 (d,  $J = 10.2$  Hz, 1H, H-2), 4.07 (dd,  $J = 10.6, 8.6$  Hz, 1H, H-2'), 4.12 (d,  $J = 5.4$  Hz, 1H, H-5), 4.35 (dd,  $J = 10.6, 5.0$  Hz, 1H, H-6'b), 4.49 (dd,  $J = 10.4, 9.0$  Hz, 1H, H-3'), 4.52 and 4.85 (AB,  $J = 12.5$  Hz, 2H,  $\text{OCH}_2\text{Ph}$ ), 4.73 (s, 1H, H-3), 5.03 (d,  $J = 8.4$  Hz, 1H, H-1'), 5.13 (s, 1H, H-1), 5.60 (s, 1H,  $\text{CHPh}$ ), 5.99

<sup>7</sup> Hesek, D.; Lee, M.; Morio, K.-I.; Mobashery, S. *J. Org. Chem.* **2004**, *69*, 2137–2146.

(d,  $J = 10.0$  Hz, 1H, NH), 7.11 - 7.55 (m, 10H);  $^{13}\text{C}$  NMR (126 MHz,  $\text{CDCl}_3$ )  $\delta$  8.7, 21.0, 22.9 ( $3 \times \text{q}$ ), 48.4 (d, C-2), 55.8 (d, C-2'), 64.4 (t, C-6), 66.2 (d, C-5'), 68.5 (t, C-6'), 70.7 (d, C-3), 72.3 (d, C-5), 73.1 (d, C-4), 74.2 (t,  $\text{OCH}_2\text{Ph}$ ), 74.4 (d, C-3'), 82.6 (d, C-4'), 96.8 (d, C-1'), 100.9 (d, C-1), 101.3 (d,  $\text{CHPh}$ ), 126.1, 127.5, 128.2, 128.3, 129.1, 137.2, 138.3, 169.1, 169.8, 172.3; HRMS (FAB), calcd for  $\text{C}_{36}\text{H}_{41}\text{N}_2\text{O}_{12}$  ( $\text{M}+\text{H}^+$ ), 693.2660, found 693.2658.

**2-Acetamido-3-*O*-benzyl-4,6-*O*-benzylidene-2-deoxy- $\beta$ -D-glucopyranosyl-(1 $\rightarrow$ 4)-2-acetamido-1,6-anhydro-2-deoxy- $\beta$ -D-glucopyranose (**31**).** NaOH (3.0 g of solid pellets, 75 mmol) was added to a stirred solution of **22** (2.1 g, 3.0 mmol) in a mixture of 1,4-dioxane/water (4:1, 150 mL) at 10 °C under a nitrogen atmosphere. The mixture was sonicated for 15 min and then the mixture was allowed to warm to room temperature and was let stir for an additional 3 h. The pH was adjusted to 3 by the addition of 0.5 N HCl and the resulting reaction mixture was stirred for 10 h at room temperature. Evaporation of the mixture to dryness gave a yellow oily residue, which was treated with MeOH (100 mL). The precipitated inorganic material was filtered off and washed well with cold MeOH. The filtrate was evaporated to dryness. The residue was taken up into pyridine (15 mL) and the solution was treated with an excess of acetic anhydride (20 mL), followed by stirring at room temperature for 20 h. The solution was evaporated to dryness. The crude product was purified with column chromatography using EtOAc/MeCN (3/2) to give **31** (1.0 g, 55%) as a white powder.  $^1\text{H}$  NMR (500 MHz,  $\text{CDCl}_3$ )  $\delta$  1.94 (s, 3H), 2.01 (s, 3H), 2.03 (s, 3H), 2.09 (s, 3H), 3.41 (dt,  $J = 9.5, 4.7$  Hz, 1H, H-5'), 3.64 - 3.83 (m, 5H, H-4, H-3', H-4', H-6a, H-6'a), 4.03 (d,  $J = 7.4$  Hz, 1H, H-6b), 4.06 (d,  $J = 9.2$  Hz, 1H, H-2), 4.09 (m, 1H, H-2'), 4.30 (dd,  $J = 10.5, 5.1$  Hz, 1H, H-6'b), 4.55 (d,  $J = 5.4$  Hz, 1H, H-5), 4.60 (d,  $J = 8.2$  Hz, 1H, H-1'), 4.67 and 4.88 (AB,  $J = 12.1$  Hz, 2H,  $\text{OCH}_2\text{Ph}$ ), 4.73 (s, 1H, H-3), 5.24 (s, 1H, H-1), 5.53 (s, 1H,  $\text{CHPh}$ ), 6.65 (d,  $J = 9.0$  Hz, 1H, NH), 7.00 (d,  $J = 10.0$  Hz, 1H, NH'), 7.18 - 7.53 (m, 14H), 8.57 (d,  $J = 4.0$  Hz, 1H);  $^{13}\text{C}$  NMR (126 MHz,  $\text{CDCl}_3$ )  $\delta$  21.0, 22.8, 23.6 ( $3 \times \text{q}$ ), 48.5 (d, C-2), 54.9 (d, C-2'), 64.6 (t, C-6), 66.2 (d, C-5'), 68.6 (t, C-6'), 71.2 (d, C-3), 72.1 (d, C-5), 72.8 (d, C-4), 74.0 (t,  $\text{OCH}_2\text{Ph}$ ), 77.26 and 81.9 (2d, C-3' and C-4'), 100.0 (d, C-1'), 100.8 (d, C-1), 101.2 (d,  $\text{CHPh}$ ), 124.3, 126.0, 127.9, 128.2, 128.3, 128.4, 129.1, 137.2, 137.3, 148.5, 169.4, 171.1, 172.2; HRMS (FAB), calcd for  $\text{C}_{32}\text{H}_{39}\text{N}_2\text{O}_{11}$  ( $\text{M}+\text{H}^+$ ), 627.2554, found 627.2572.

**2-Acetamido-3-*O*-benzyl-4,6-*O*-benzylidene-2-deoxy- $\beta$ -D-glucopyranosyl-(1 $\rightarrow$ 4)-2-acetamido-1,6-anhydro-2-deoxy-3-*O*-[(1*R*)-1-carboxyethyl]- $\beta$ -D-glucopyranose (**33**).** A solution of NaOMe (86 mg, 1.6 mmol) in 1 mL anhydrous MeOH was added dropwise to a suspension of **31** (1.0 g, 1.6 mmol) in anhydrous MeOH (20 mL). The mixture was stirred at room temperature for 1 h under an atmosphere of nitrogen and then after neutralization with acetic acid (0.5 mL), the solution was evaporated to dryness. The residue (compound **32**) was dissolved in anhydrous 1,4-dioxane/DMF (1/1, 10 mL), 4-Å

molecular sieves (1 g) were added, and the suspension was stirred under nitrogen for 1 h. After addition of NaH (0.19 g, 4.8 mmol, 60% dispersion in oil), the mixture was kept for 30 min at 45 °C, and then the temperature was brought to room temperature. (*S*)-2-Chloropropionic acid (0.87 g, 8.0 mmol) was added and the stirring was continued for 2 h at 90 °C. The organic solvent was evaporated to dryness. A 50 mL portion of water was carefully added to the residue to decompose the excess of sodium hydride. The solution was extracted once with hexanes/EtOAc (1/1) to remove the mineral oil and the solution was filtered over a layer of charcoal. The solution was brought to pH 3.0 by the addition of 2.5 M hydrochloric acid at the ice-water temperature. The resulting precipitate was immediately extracted with CH<sub>2</sub>Cl<sub>2</sub>. The combined organic layer was washed with water, rapidly dried over Na<sub>2</sub>SO<sub>4</sub>, and concentrated to dryness. The residue was purified by column chromatography on silica column, using CHCl<sub>3</sub>/acetone (3/1) to afford compound **33** (0.50 g, 48%). **32**: <sup>1</sup>H NMR (500 MHz, DMF-*d*<sub>6</sub>) δ 2.01 (s, 3H), 2.07 (s, 3H), 3.55 (td, *J* = 9.6, 5.0 Hz, 1H, H-5'), 3.62 (s, 1H, H-3), 3.67 (t, *J* = 6.4 Hz, 2H, H-6a), 3.79 (m, 1H, H-4), 3.84 (t, *J* = 9.3 Hz, 1H, H-4'), 3.91 (td, *J* = 9.9, 3.6 Hz, 2H, H-3' and , H-6'a), 3.98 (d, *J* = 9.8 Hz, 1H, H-2), 4.09 (q, *J* = 9.2 Hz, 1H, H-2'), 4.28 (d, *J* = 7.0 Hz, 1H, H-6b), 4.29 - 4.33 (dd, *J* = 10.2, 4.9 Hz, 1H, H-6'b), 4.77 and 4.89 (AB, *J* = 11.7 Hz, 2H, OCH<sub>2</sub>Ph), 4.79 (s, 1H, H-5), 4.86 (d, *J* = 8.4 Hz, 1H, H-1'), 5.20 (s, 1H, H-1), 5.79 (s, 1H, CHPh), 7.07 (d, *J* = 10.0 Hz, 1H, NH), 7.25 - 7.56 (m, 10H), 8.43 (d, *J* = 9.3 Hz, 1H, NH'); <sup>13</sup>C NMR (126 MHz, DMF-*d*<sub>6</sub>) δ 22.2, 23.2 (2 × q), 51.3 (d, C-2), 55.1 (d, C-2'), 64.5 (t, C-6), 66.2 (d, C-5'), 68.4 (t, C-6'), 71.2 (d, C-3), 72.3 (d, C-5), 74.0 (t, OCH<sub>2</sub>Ph), 75.3 (d, C-4), 78.9 (d, C-3'), 81.9 (d, C-4'), 99.9 (d, C-1'), 100.9 (d, CHPh), 101.4 (d, C-1), 126.3, 127.6, 127.7, 128.3, 129.0, 138.3, 139.4, 169.8, 172.0; HRMS (FAB), calcd for C<sub>30</sub>H<sub>37</sub>N<sub>2</sub>O<sub>12</sub> (M+H<sup>+</sup>), 585.2448, found 585.2444. **33**: <sup>1</sup>H NMR (500 MHz, CD<sub>3</sub>CN) δ 1.34 (d, *J* = 6.8 Hz, 3H), 1.92 (s, 3H), 2.01 (s, 3H), 3.36 (m, 1H, H-3), 3.43 (td, *J* = 9.6, 5.1 Hz, 1H, H-5'), 3.64 - 3.84 (m, 5H, H-6a, H-3', H-4', H-4, H-6'a), 3.93 (dd, *J* = 10.0, 8.4 Hz, 1H, H-2'), 4.01 (s, 1H, H-2), 4.11 (q, *J* = 6.8 Hz, 1H, Lac-α-H), 4.12 (t, *J* = 6.9 Hz, 1H, H-6b), 4.27 (dd, *J* = 10.4, 5.0 Hz, 1H, H-6'b), 4.56 (d, *J* = 5.6 Hz, 1H, H-5), 4.59 (d, *J* = 8.4 Hz, 1H, H-1'), 4.66 and 4.82 (AB, *J* = 11.7 Hz, 2H, OCH<sub>2</sub>Ph), 5.22 (s, 1H, H-1), 5.63 (s, 1H, CHPh), 7.25 - 7.51 (m, 10H); <sup>13</sup>C NMR (126 MHz, CD<sub>3</sub>CN) δ 18.9, 23.0, 23.7 (3 × q), 49.9 (d, C-2), 55.8 (d, C-2'), 65.7 (t, C-6), 67.1 (d, C-5'), 69.3 (t, C-6'), 73.8 (d, C-5), 74.3 (d, C-4), 75.0 (t, OCH<sub>2</sub>Ph), 75.3 (d, Lac-α-C), 78.7 (d, C-3), 79.2 (d, C-3'), 82.8 (d, C-4'), 101.3 (d, C-1'), 101.9 (d, C-1), 102.0 (d, CHPh), 127.2, 128.7, 129.0, 129.3, 130.0, 138.9, 139.9, 171.5, 173.0, 175.4; HRMS (FAB), calcd for C<sub>33</sub>H<sub>41</sub>N<sub>2</sub>O<sub>12</sub> (M+H<sup>+</sup>), 658.2660, found 658.2660.

**Compound 36.** EDCI (0.18 g, 0.94 mmol) was added to a mixture of *N*-hydroxysuccinimide (0.11 g, 0.96 mmol) and **33** (0.5 g, 0.76 mmol) in CH<sub>2</sub>Cl<sub>2</sub> (5 mL) in an ice-water bath. The mixture was stirred at room temperature 20 h. Meanwhile, the Boc-protected pentapeptide (0.85 g, 0.91 mmol) in CH<sub>2</sub>Cl<sub>2</sub> (5 mL) was treated with trifluoroacetic acid (2 mL) in an ice-water bath. Temperature was gradually

increased to room temperature over 1 h. The reaction mixture was evaporated to dryness under reduced pressure and the residue was dissolved in toluene. This was followed by evaporation to dryness. The residue (**34**) was dissolved in  $i\text{Pr}_2\text{NEt}$  (0.4 mL, 2.3 mmol) and DMF (5 mL), and the solution was then added to the NHS-ester of the anhydrosugar, prepared above. The resulting mixture was stirred at room temperature 20 h. The mixture was diluted with  $\text{CH}_2\text{Cl}_2$  and water was added. Layers were separated. The organic layer was dried over  $\text{MgSO}_4$ , filtered, concentrated and the sample was subjected to column chromatography on silica gel ( $\text{CH}_2\text{Cl}_2/\text{MeCN}/\text{MeOH}$ , 10:3:0.5) to give the title compound (0.84 g, 75%).  $^1\text{H}$  NMR (500 MHz,  $\text{CD}_3\text{CN}$ )  $\delta$  1.32 (d,  $J = 7.2$  Hz, 3H), 1.36 (2d, 6H), 1.40 (d,  $J = 7.4$  Hz, 3H), 1.41 - 1.97 (m, 8H), 1.99 (s, 3H), 2.05 (s, 3H), 2.15 - 2.29 (m, 2H), 3.42 (s, 1H, H-3), 3.50 (td,  $J = 9.7$ , 5.0 Hz, 1H, H-5'), 3.71 - 3.91 (m, 5H, H-5, H-6a H-3', H-4', H-6'a), 3.96 - 4.04 (m, 2H, H-2, H-2'), 4.04 - 4.14 (m, 3H), 4.24 (d,  $J = 7.6$  Hz, 1H, H-6b), 4.28 - 4.45 (m, 6H), 4.31 (m, 1H, H-6'b), 4.65 (d,  $J = 8.4$  Hz, 1H, H-1'), 4.63 - 4.68 (m, 1H, H-4), 4.73 and 4.88 (2d,  $J = 11.8$  Hz, 1H), 5.09 - 5.19 (m, 4H), 5.24 (s, 2H), 5.34 (s, 1H, H-1), 5.69 (s, 1H,  $\text{CHPh}$ ), 6.77 (d,  $J = 9.4$  Hz, 1H), 6.92 (d,  $J = 10.0$  Hz, 1H), 7.30 - 7.58 (m, 15H), 7.95 (d,  $J = 6.4$  Hz, 1H);  $^{13}\text{C}$  NMR (126 MHz,  $\text{CD}_3\text{CN}$ )  $\delta$  17.6, 17.9, 18.0, 18.7, 22.9, 23.8, (6  $\times$  q), 22.9, 27.7, 31.7, 31.7, 32.0 (5  $\times$  t), 48.4 (d, C-2), 49.3, 49.9, 50.6, 52.1, 55.5 (5  $\times$  d), 55.8 (d, C-2'), 62.7 (d), 65.4 (t, C-6), 67.0 (d, C-5'), 67.3 (t), 67.6 (t), 68.2 (t), 69.2 (t, C-6'), 73.5 (d, C-5), 74.6 (d, C-4), 75.0 (t,  $\text{OCH}_2\text{Ph}$ ), 76.9 (d, Lac- $\alpha$ -C), 79.2 (d, C-3'), 79.4 (d, C-3), 82.7 (d, C-4'), 100.8 (d, C-1'), 101.9 (d, C-1 and  $\text{CHPh}$ ), 127.2, 128.6, 128.9, 129.1, 129.2, 129.3, 129.4, 129.5, 129.7, 130.0, 136.8, 137.1, 137.2, 138.9, 139.8, 171.1, 171.4, 172.3, 172.9, 173.2, 173.5, 173.9, 174.0, 174.3; FAB MS  $m/z$  1441.96  $[\text{M}+\text{H}]^+$ .

***N*-Acetyl- $\beta$ -D-glucosamine-(1 $\rightarrow$ 4)-1,6-anhydro- $\beta$ -D-*N*-acetylmuramyl-L-Ala- $\gamma$ -D-Glu-*meso*-DAP-D-Ala-D-Ala (**1**).** Compound **36** (0.50 g, 0.34 mmol) in AcOH (5 mL) and stirred at 60  $^\circ\text{C}$  for 2 h. After removal of AcOH, the residue was dissolved in MeOH (5 mL) and stirred in the presence of 10% Pd/C (0.1 g) under an atmosphere of hydrogen at 50  $^\circ\text{C}$  for 3 h. The reaction mixture was filtered through a layer of Celite and the residue was washed with MeOH. The combined filtrate was concentrated to dryness under reduced pressure. The crude product was subjected to HPLC purification to afford compound **1** (0.22 g, 66%). Preparative HPLC purifications were performed on delta-pak C18 reversed-phased column, 100  $\text{\AA}$  pore size, 19  $\times$  300 mm using a linear gradient of 5-15% acetonitrile in water supplemented with 0.1% TFA over 0.5 h.  $^1\text{H}$  NMR (600 MHz,  $\text{D}_2\text{O}$ )  $\delta$  1.32 - 1.46 (4d, 12H), 1.46 - 1.56 (m, 2H), 1.73 - 2.03 (m, 5H), 2.04, 2.06 (2s, 6H), 2.22 - 2.45 (m, 3H), 3.45 (m, 2H, H-5', H-4'), 3.53 - 3.62 (m, 2H, H-3', H-3), 3.68 - 3.84 (m, 3H, H-6'a, H-2', H-6a), 3.90 (d,  $J = 12.0$  Hz, 1H, H-6'b), 3.99 (d,  $J = 12.0$  Hz, 2H, H-2, H-4), 4.06 (t,  $J = 6.2$  Hz, 1H), 4.15 - 4.44 (m, 6H), 4.66 (d,  $J = 8.5$  Hz, 1H, H-1'), 4.70 (d,  $J = 5.0$  Hz, 1H, H-5), 5.44 (s, 1H, H-1);  $^{13}\text{C}$  NMR (151 MHz,  $\text{D}_2\text{O}$ )  $\delta$  15.9, 16.3 16.7, 17.9, 20.7, 22.2 (6  $\times$  q), 21.8, 26.4, 29.2, 30.1, 31.1 (5  $\times$  t), 48.8 (d, C-2), 48.5, 49.4, 51.7, 52.5, 53.8 (6  $\times$  d),

55.4 (d, C-2'), 60.5 (t, C-6'), 64.7 (t, C-6), 69.7 (t, C-4'), 73.2 (t, C-3'), 73.4 (C-5), 74.1 (C-4), 75.9 (d, C-5'), 76.0 (d, Lac- $\alpha$ -C), 77.2 (d, C-3), 99.8 (d, C-1), 100.4 (d, C-1'), 171.8, 173.5, 173.8, 174.4, 174.6, 175.0, 175.3, 175.4, 176.0 ( $10 \times \text{C=O}$ ); HRMS (FAB), calcd for  $\text{C}_{40}\text{H}_{65}\text{N}_8\text{O}_{21}$  ( $\text{M}+\text{H}^+$ ), 993.4264, found 993.4230.

***N*-Acetyl- $\beta$ -D-glucosamine-(1 $\rightarrow$ 4)-1,6-anhydro- $\beta$ -D-*N*-acetylmuramyl-L-Ala- $\gamma$ -D-Glu-L-Lys-D-Ala-D-Ala (2).** This material was prepared in the same manner as described for **1**, with the exception that pentapeptide **35**<sup>8</sup> was used in place of **34**. <sup>1</sup>H NMR (500 MHz, CD<sub>3</sub>OD)  $\delta$  1.34 - 1.48 (4d, 16H), 1.51 (br. s, 1H), 1.63 - 1.74 (m, 1H), 1.78 - 1.93 (m, 2H), 2.04 (s, 3H), 2.07 (s, 3H), 2.20 - 2.35 (m, 3H), 2.95 (m, 2H), 3.28 - 3.39 (m, 2H, H-5', H-4'), 3.49 (dd,  $J = 10.3, 8.3$  Hz, 1H, H-3'), 3.55 (s, 1H, H-3), 3.71 (dd,  $J = 11.9, 5.3$  Hz, 1H, H-6'a), 3.74 - 3.80 (m, 2H, H-2', H-6a), 3.84 - 3.94 (m, 2H, H-4, H-6'b), 3.99 (s, 1H, H-2), 4.14 (q,  $J = 6.8$  Hz, 1H, Lac- $\alpha$ -H), 4.23 - 4.43 (m, 7H), 4.53 (d,  $J = 8.4$  Hz, 1H, H-1'), 4.65 (d,  $J = 5.0$  Hz, 1H, H-5), 5.33 (s, 1H, H-1); <sup>13</sup>C NMR (126 MHz, CD<sub>3</sub>OD)  $\delta$  18.1, 18.3, 18.7, 18.9, 21.2, 22.9, 23.7 ( $6 \times \text{q}$ ), 28.3, 29.6, 32.4, 32.9, 40.6 ( $5 \times \text{t}$ ), 49.4 (d, C-2), 50.7 (d), 51.0 (d), 51.2 (d), 54.1 (d), 55.6 (d), 57.2 (d, C-2'), 62.7 (t, C-6), 66.1 (t, C-6'), 72.1 (d, C-4'), 74.8 (d, C-5), 75.4 (d, C-3'), 75.6 (d, C-4), 77.5 (d, Lac- $\alpha$ -C), 78.3 (d, C-5'), 79.8 (d, C-3), 101.9 (d, C-1'), 102.1 (d, C-1), 173.5, 174.4, 174.6, 175.1, 175.6, 175.7, 175.8, 176.6, 177.7; HRMS (FAB), calcd for  $\text{C}_{39}\text{H}_{65}\text{N}_8\text{O}_{19}$  ( $\text{M}+\text{H}^+$ ), 949.4366, found 949.4387.

**Table S1.** Crystallographic Details

|                                                                | <b>4a</b>                                             | <b>5</b>                                                                                 | <b>6</b>                                        | <b>8</b>                                                      | <b>11</b>                                      | <b>30</b>                                                     |
|----------------------------------------------------------------|-------------------------------------------------------|------------------------------------------------------------------------------------------|-------------------------------------------------|---------------------------------------------------------------|------------------------------------------------|---------------------------------------------------------------|
| chemical formula                                               | C <sub>19</sub> H <sub>30</sub> O <sub>4</sub> Si     | C <sub>13</sub> H <sub>16</sub> O <sub>4</sub> ,<br>0.28(C <sub>7</sub> H <sub>8</sub> ) | C <sub>13</sub> H <sub>15</sub> IO <sub>4</sub> | C <sub>13</sub> H <sub>15</sub> N <sub>3</sub> O <sub>4</sub> | C <sub>13</sub> H <sub>14</sub> O <sub>4</sub> | C <sub>18</sub> H <sub>22</sub> N <sub>4</sub> O <sub>9</sub> |
| formula weight                                                 | 350.52                                                | 262.29                                                                                   | 362.15                                          | 277.28                                                        | 234.24                                         | 438.40                                                        |
| space group                                                    | <i>P</i> 2 <sub>1</sub> 2 <sub>1</sub> 2 <sub>1</sub> | <i>P</i> 2 <sub>1</sub> 2 <sub>1</sub> 2 <sub>1</sub>                                    | <i>P</i> 1                                      | <i>P</i> 2 <sub>1</sub> 2 <sub>1</sub> 2 <sub>1</sub>         | <i>P</i> 2 <sub>1</sub>                        | <i>P</i> 2 <sub>1</sub> 2 <sub>1</sub> 2                      |
| <i>a</i> (Å)                                                   | 6.6344(2)                                             | 4.5700(1)                                                                                | 6.1718(4)                                       | 6.7203(3)                                                     | 10.9272(12)                                    | 17.5877(2)                                                    |
| <i>b</i> (Å)                                                   | 10.9383(2)                                            | 13.9439(3)                                                                               | 7.5275(5)                                       | 10.1187(4)                                                    | 19.943(2)                                      | 21.7941(2)                                                    |
| <i>c</i> (Å)                                                   | 27.1190(6)                                            | 21.6237(5)                                                                               | 13.9663(6)                                      | 18.5765(8)                                                    | 11.0323(11)                                    | 5.7479(1)                                                     |
| $\alpha$ (°)                                                   | 90.00                                                 | 90.00                                                                                    | 91.5770(10)                                     | 90.00                                                         | 90.00                                          | 90.00                                                         |
| $\beta$ (°)                                                    | 90.00                                                 | 90.00                                                                                    | 92.433(5)                                       | 90.00                                                         | 110.217(6)                                     | 90.00                                                         |
| $\gamma$ (°)                                                   | 90.00                                                 | 90.00                                                                                    | 91.599(5)                                       | 90.00                                                         | 90.00                                          | 90.00                                                         |
| <i>V</i> Å <sup>3</sup>                                        | 1968.00(8)                                            | 1377.94(5)                                                                               | 647.74(7)                                       | 1263.22(9)                                                    | 2256.1(4)                                      | 2203.22(5)                                                    |
| <i>Z</i>                                                       | 4                                                     | 4                                                                                        | 2                                               | 4                                                             | 8                                              | 4                                                             |
| <i>T</i> (°C)                                                  | 296(2)                                                | 296(2)                                                                                   | 100(2)                                          | 100(2)                                                        | 100(2)                                         | 291(2)                                                        |
| $\lambda$ (Å)                                                  | 1.54178                                               | 1.54178                                                                                  | 0.71073                                         | 1.54178                                                       | 0.71073                                        | 1.54178                                                       |
| <i>D</i> <sub>obsd</sub> (g cm <sup>-3</sup> )                 | 1.183                                                 | 1.264                                                                                    | 1.857                                           | 1.458                                                         | 1.379                                          | 1.322                                                         |
| $\mu$ (cm <sup>-1</sup> )                                      | 1.202                                                 | 0.748                                                                                    | 2.476                                           | 0.923                                                         | 0.102                                          | 0.919                                                         |
| <i>R</i> 1( <i>F</i> <sup>2</sup> , <i>I</i> > 2σ( <i>I</i> )) | 0.0265                                                | 0.0504                                                                                   | 0.0160                                          | 0.0259                                                        | 0.0820                                         | 0.0324                                                        |
| <i>wR</i> 2( <i>F</i> <sup>2</sup> )                           | 0.0686                                                | 0.1500                                                                                   | 0.0584                                          | 0.0660                                                        | 0.2494                                         | 0.0899                                                        |
| <i>S</i>                                                       | 1.055                                                 | 0.935                                                                                    | 1.303                                           | 1.106                                                         | 1.098                                          | 1.045                                                         |

$$wR2 = \sqrt{\frac{\sum [w(F_o^2 - F_c^2)^2]}{\sum [w(F_o^2)^2]}}; R1 = \frac{\sum ||F_o| - |F_c||}{\sum |F_o|}; GooF = S = \sqrt{\frac{\sum [w(F_o^2 - F_c^2)^2]}{(n-p)}}$$

*n*= number of reflections, *p*= number of parameters refined

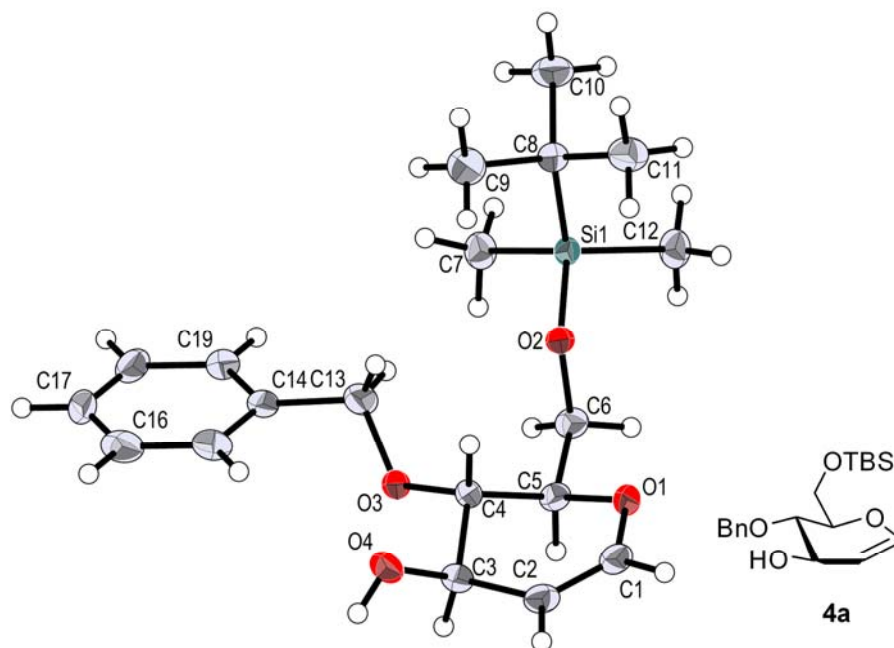

**Figure S1.** The molecular structure of compound **4a**, showing the atom-numbering scheme. The ORTEP diagram is shown at 50% probability level. Hydrogen atoms are shown as small spheres of arbitrary radii.

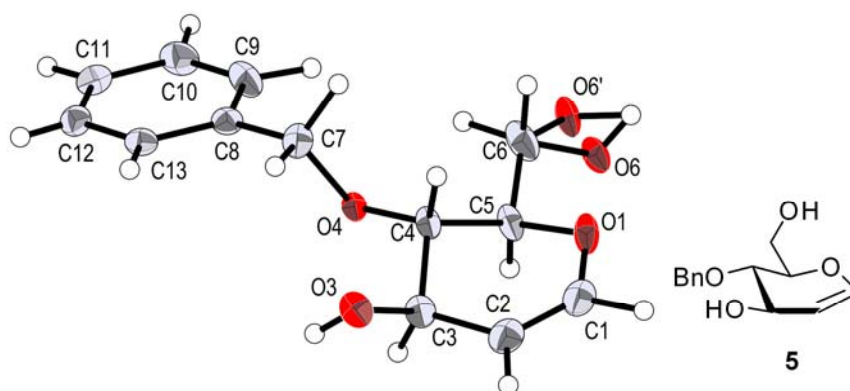

**Figure S2.** The molecular structure of compound **5**, showing the atom-numbering scheme. The ORTEP diagram is shown at 50% probability level. Hydrogen atoms are shown as small spheres of arbitrary radii. Disorder is present in the position of O6. Two sites were modeled, with site occupancy for the first at 0.79(3). One hydrogen is shared between these atomic positions. The disordered, partially present molecule of toluene has been omitted.

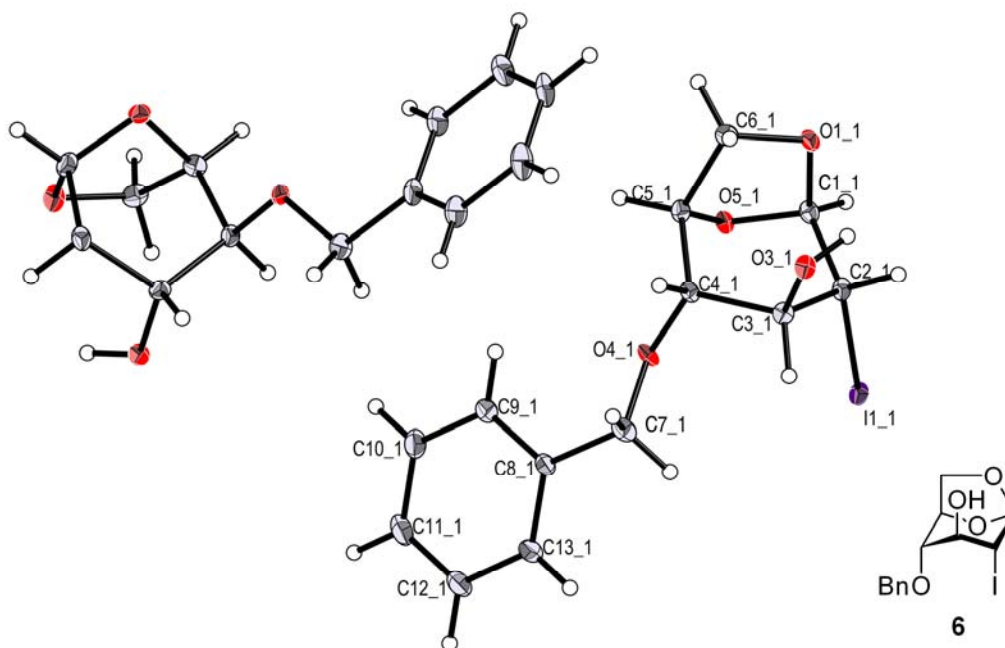

**Figure S3.** The molecular structure of compound **6**, showing the atom-numbering scheme. The ORTEP diagram is shown at 50% probability level. Hydrogen atoms are shown as small spheres of arbitrary radii. Two independent molecules are present in the unit cell.

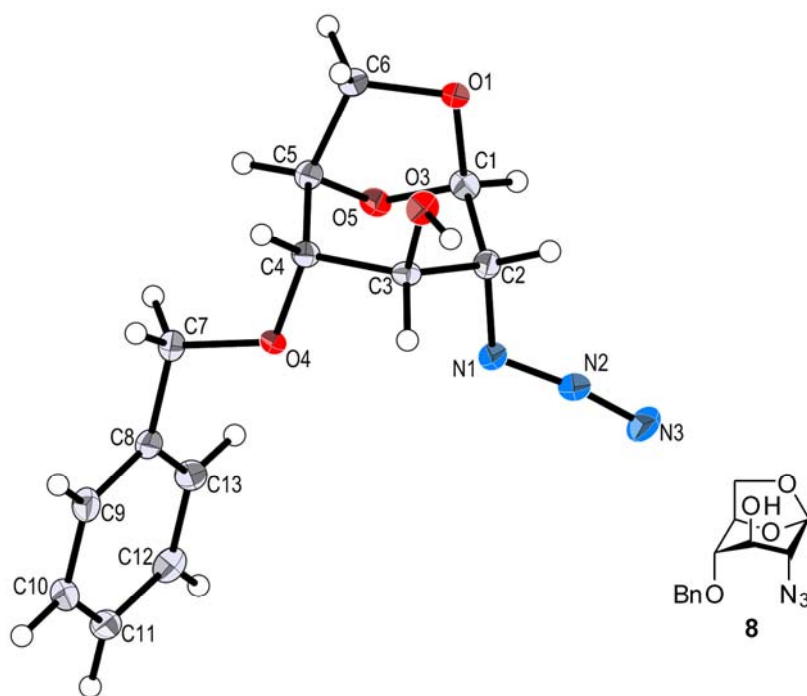

**Figure S4.** The molecular structure of compound **8**, showing the atom-numbering scheme. The ORTEP diagram is shown at 50% probability level. Hydrogen atoms are shown as small spheres of arbitrary radii.

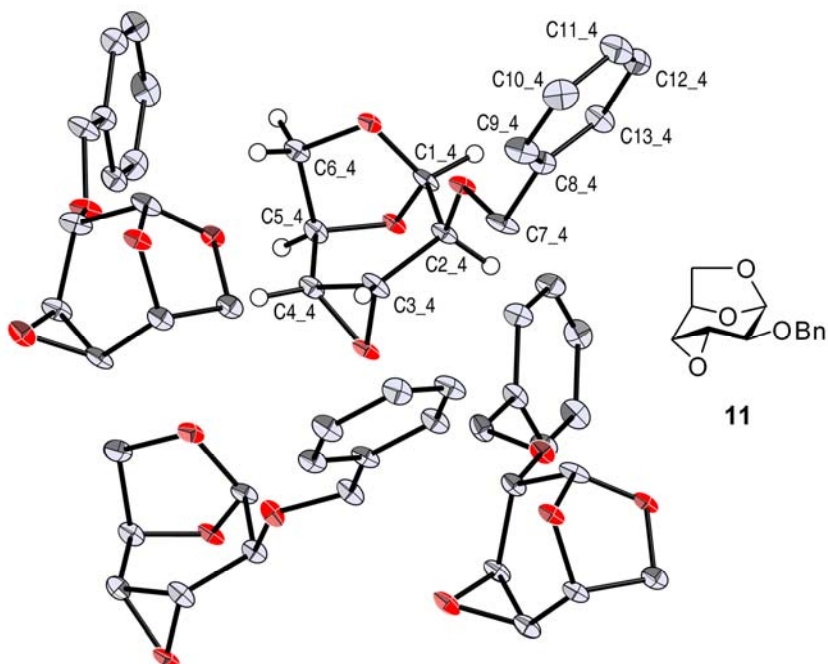

**Figure S5.** The molecular structure of compound **11**, showing the atom-numbering scheme. The ORTEP diagram is shown at 50% probability level. Hydrogen atoms are shown as small spheres of arbitrary radii. Four independent molecules are present in the unit cell.

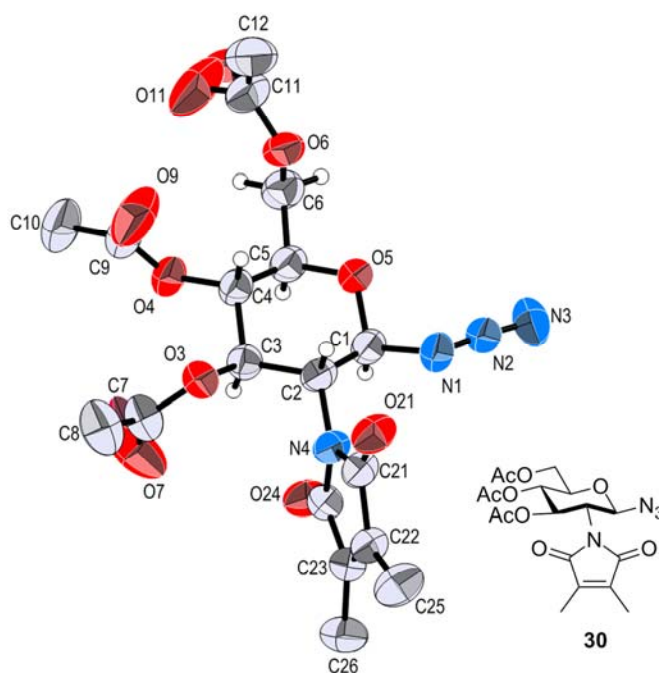

**Figure S6.** The molecular structure of compound **30**, showing the atom-numbering scheme. The ORTEP diagram is shown at 50% probability level. Hydrogen atoms are shown as small spheres of arbitrary radii.

DHL-3-3

exp1 s2pu1

| SAMPLE      |            | DEC. & VT  |           |
|-------------|------------|------------|-----------|
| date        | Nov 4 2007 | dfrq       | 599.887   |
| solvent     | cdcl3      | dn         | H1        |
| file        | exp        | dpwr       | 30        |
| ACQUISITION |            | dof        | 0         |
| sfrq        | 599.887    | dm         | nnn       |
| tn          | H1         | dmm        | c         |
| at          | 4.096      | dmf        | 200       |
| np          | 65536      | dseq       |           |
| sw          | 8000.0     | dres       | 1.0       |
| fb          | 4400       | homo       | n         |
| bs          | 8          | DEC2       |           |
| tpwr        | 56         | dfrq2      | 0         |
| pw          | 10.7       | dn2        |           |
| d1          | 0.100      | dpwr2      | 1         |
| tof         | 0          | dof2       | 0         |
| nt          | 16         | dn2        | n         |
| ct          | 16         | dmm2       | c         |
| alock       | n          | dmf2       | 200       |
| gain        | not used   | dseq2      |           |
| FLAGS       |            | dres2      | 1.0       |
| il          | n          | homo2      | n         |
| in          | n          | PROCESSING |           |
| dp          | y          | wtfile     |           |
| hs          | nn         | proc       | ft        |
| DISPLAY     |            | tn         | 1310/2    |
| sp          | -1000.4    | math       | f         |
| wp          | 8000.0     |            |           |
| vs          | 779        | werr       |           |
| sc          | 0          | wexp       | proc_H pH |
| wc          | 250        | wbs        |           |
| hzmm        | 32.00      | wnt        | wft       |
| is          | 156.23     |            |           |
| rfl         | 1000.4     |            |           |
| rfp         | 0          |            |           |
| th          | 7          |            |           |
| iis         | 6.000      |            |           |
| nm          | cdc ph     |            |           |

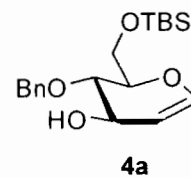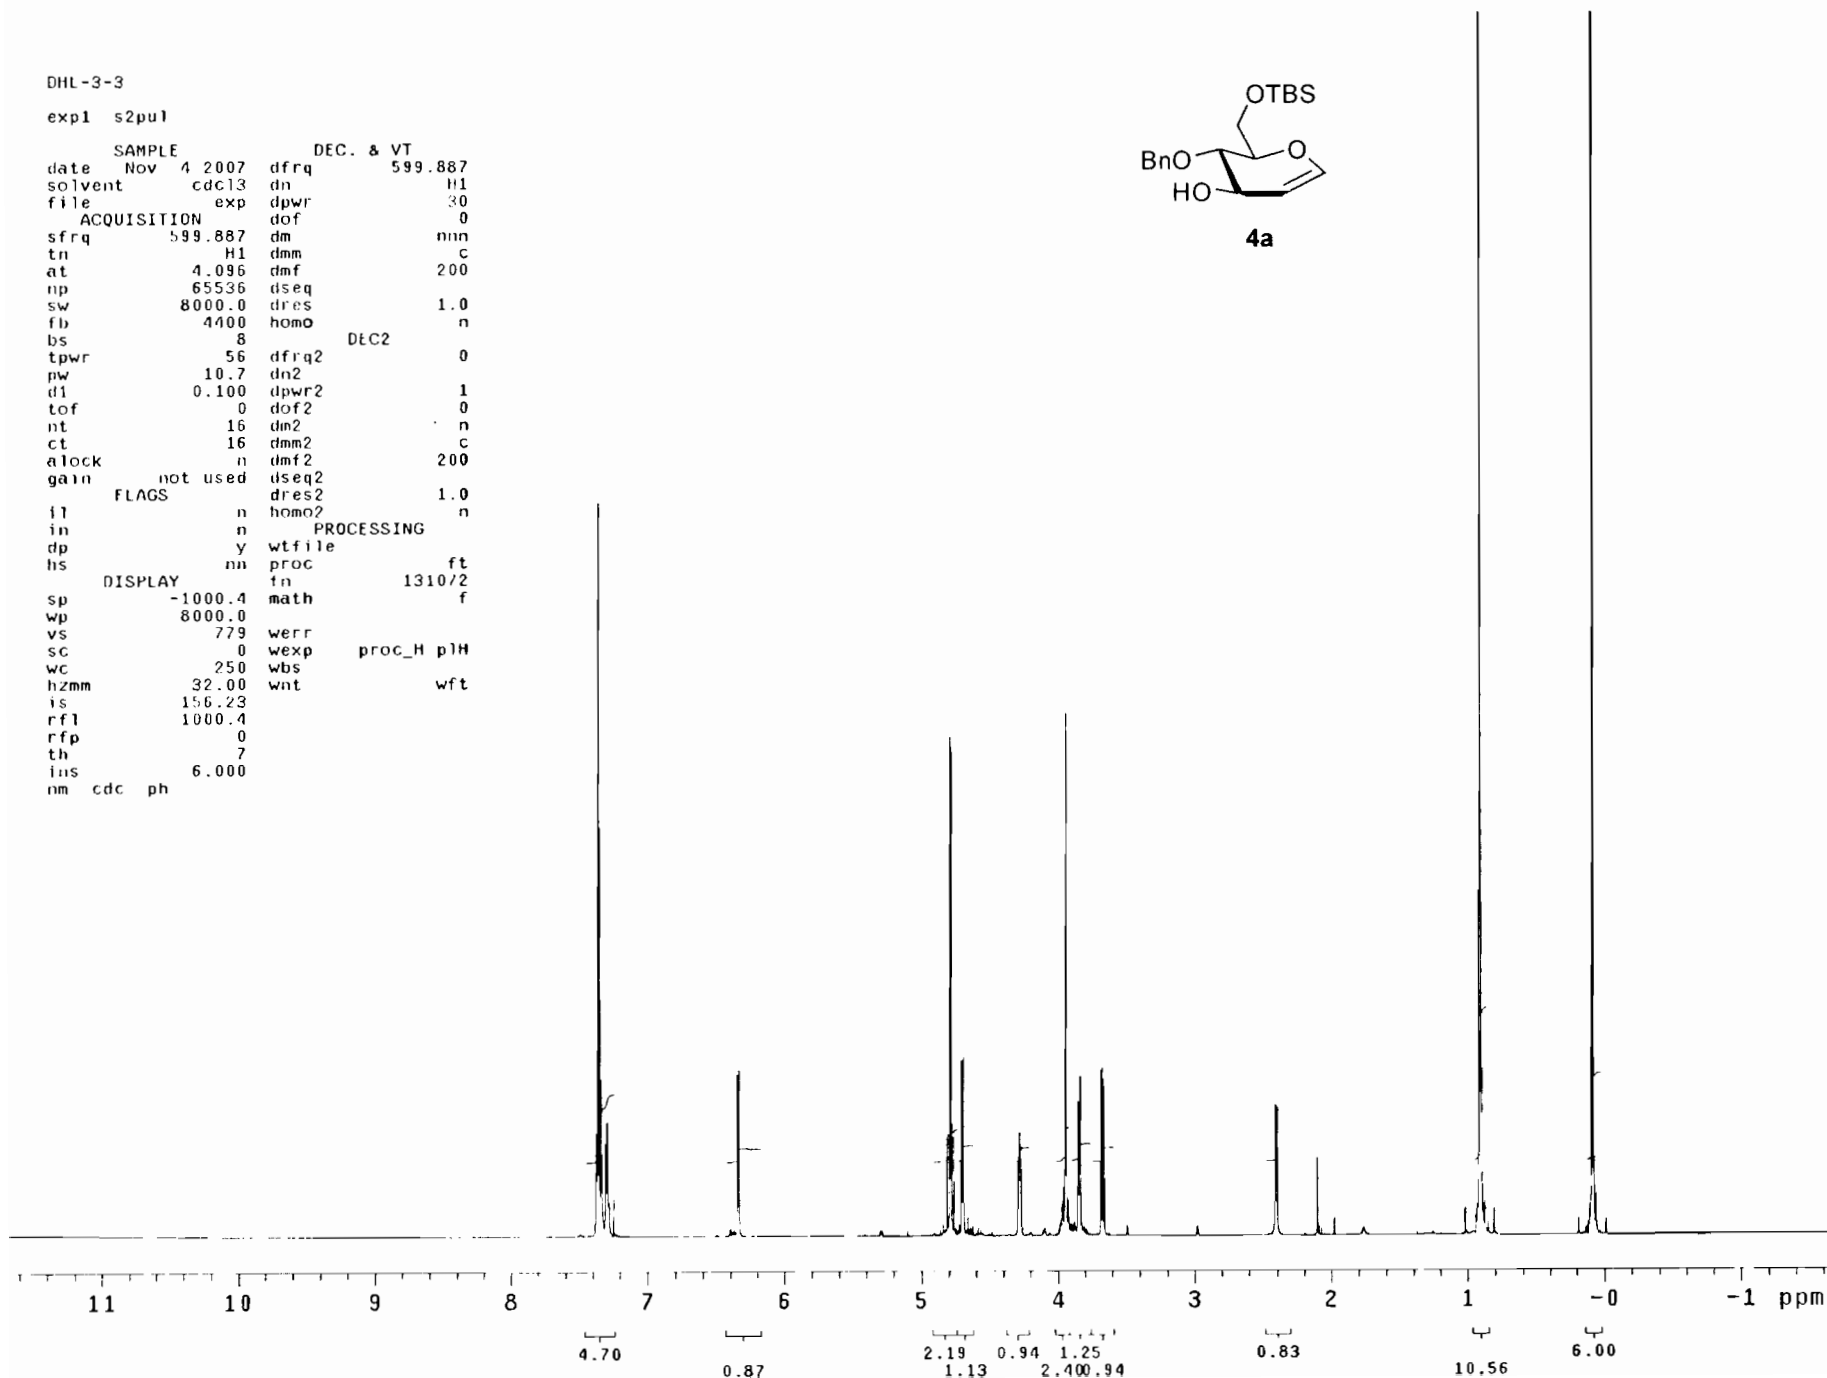

DHL-3-3

Pulse Sequence: relayh

Solvent: cdcl3

Ambient temperature

UNITYplus-600 "tesla"

Relax. delay 1.000 sec

COZY 90-90

Acq. time 0.214 sec

Width 4793.9 Hz

2D Width 4793.9 Hz

8 repetitions

256 increments

OBSERVE H1, 599.8839319 MHz

DATA PROCESSING

Sine bell 0.107 sec

F1 DATA PROCESSING

Sine bell 0.053 sec

FT size 2048 x 2048

Total time 42 min, 47 sec

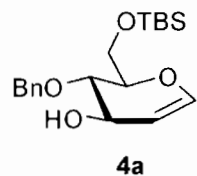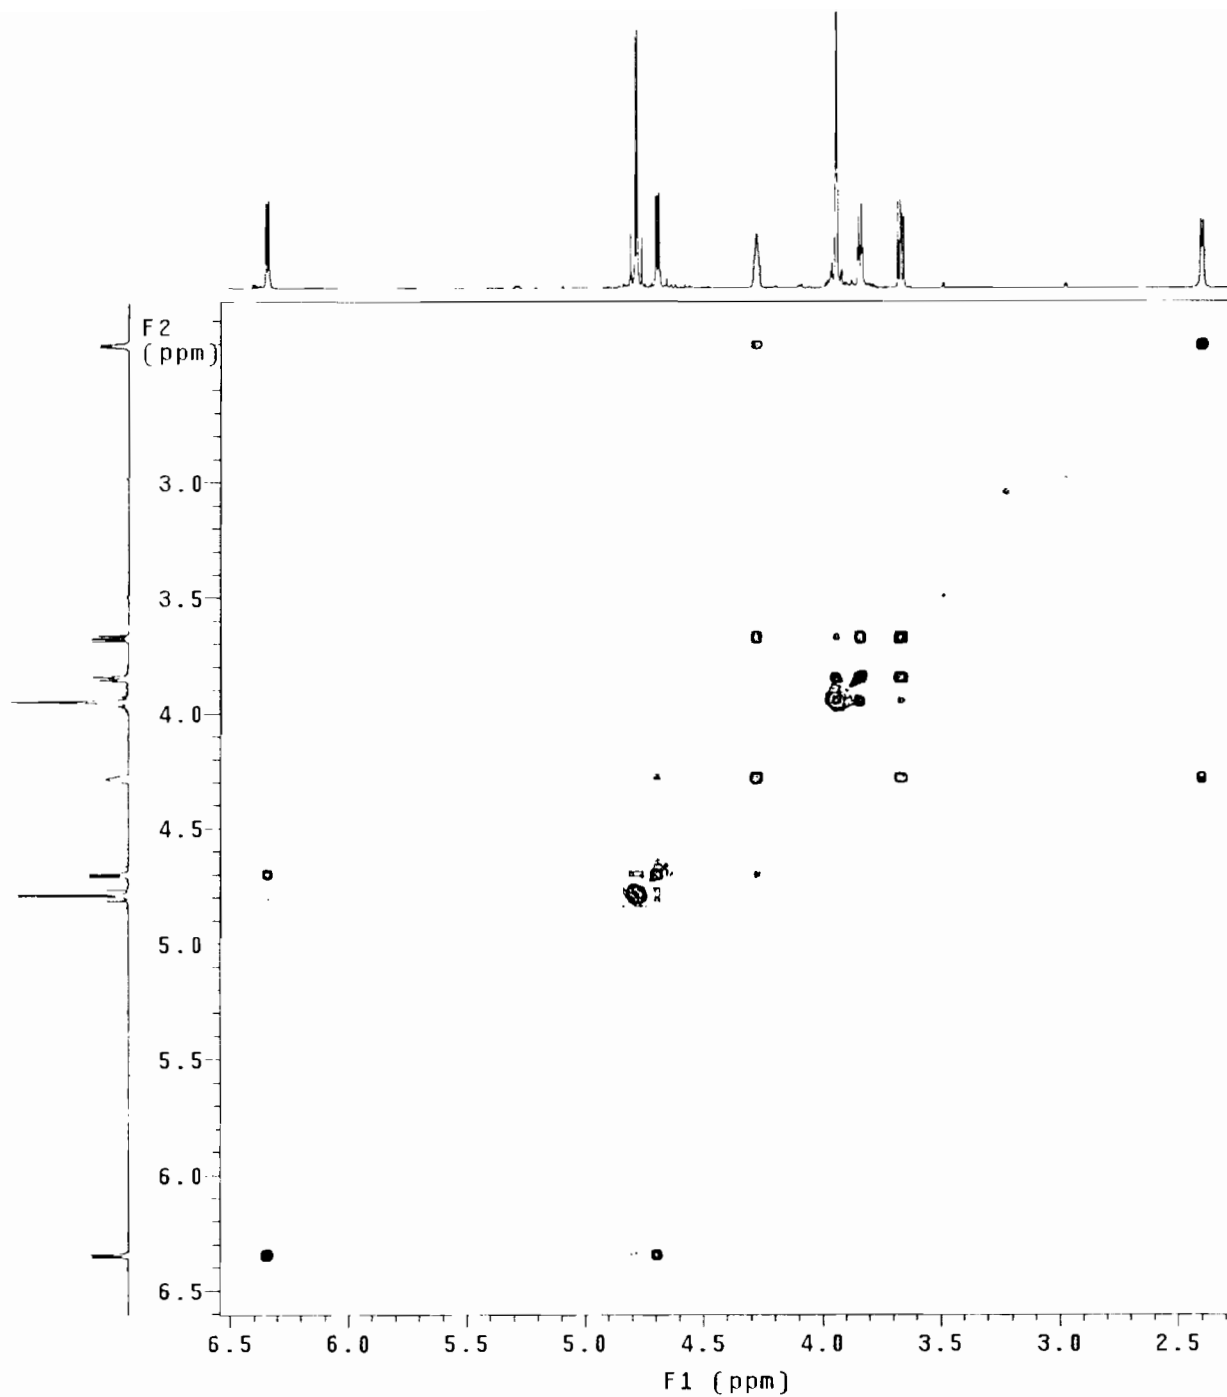

DHL-3\_3

exp2 s2pu1

SAMPLE DEC. & VT  
 date Nov 4 2007 dfrq 599.887  
 solvent CDC13 dn H1  
 file exp dpwr 36  
 ACQUISITION dof 0  
 sfrq 150.856 dm yyy  
 tn C13 dmm w  
 at 0.963 dmf 9708  
 np 65536 dseq  
 sw 34013.6 dres 1.0  
 fb 18800 homo n  
 bs 4  
 tpwr 51 dfrq2 DEC2 0  
 pw 8.0 dn2  
 dl 2.000 dpwr2 1  
 tof 1576.9 dof2 0  
 nt 640 dm2 n  
 ct 93 dmm2 c  
 alock n dmf2 15202  
 gain not used dseq2 1.0  
 FLAGS n homo2 n  
 in n PROCESSING  
 dp y lb 1.00  
 hs nn wtfile  
 DISPLAY proc ft  
 sp -1530.3 fn 131072  
 wp 28694.7 math f  
 vs 82  
 sc 0 werr  
 wc 250 wexp process p1C  
 hzmm 114.78 wbs wft  
 is 500.00  
 rfl 13591.9  
 rfp 11614.8  
 th 5  
 ins 100.000  
 nm cdc ph

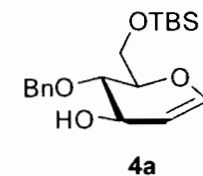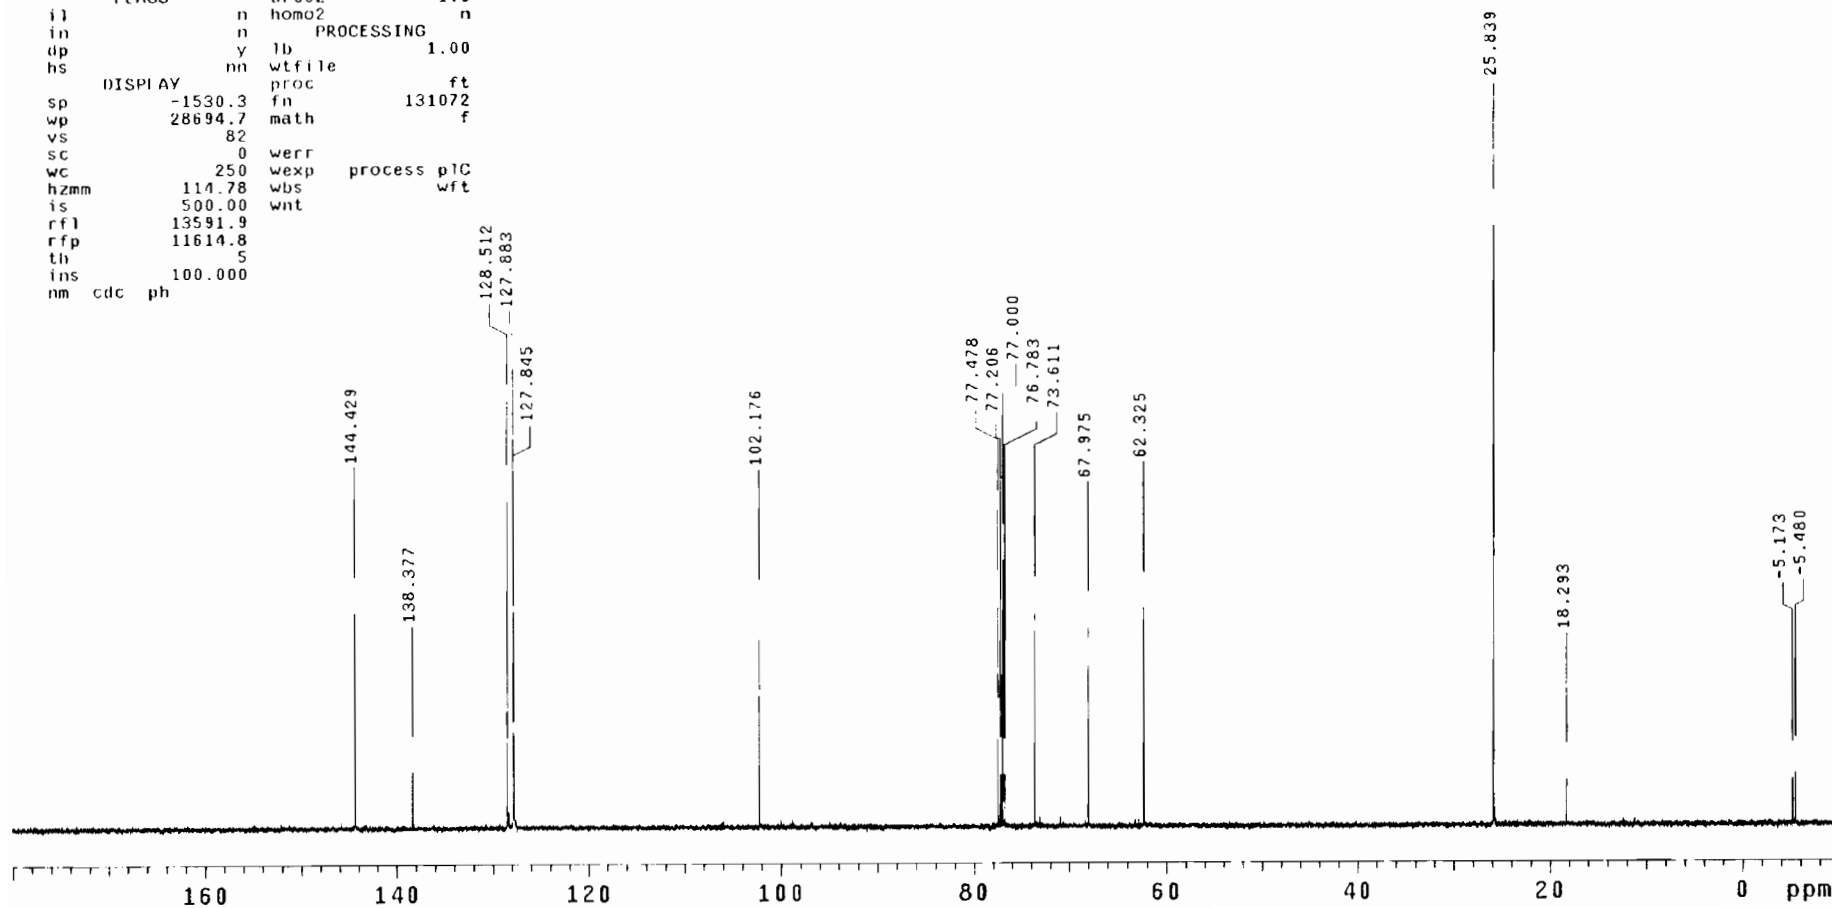

DHL-3\_3

Pulse Sequence: dept

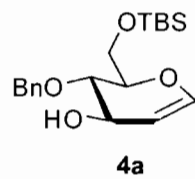

CH3 carbons

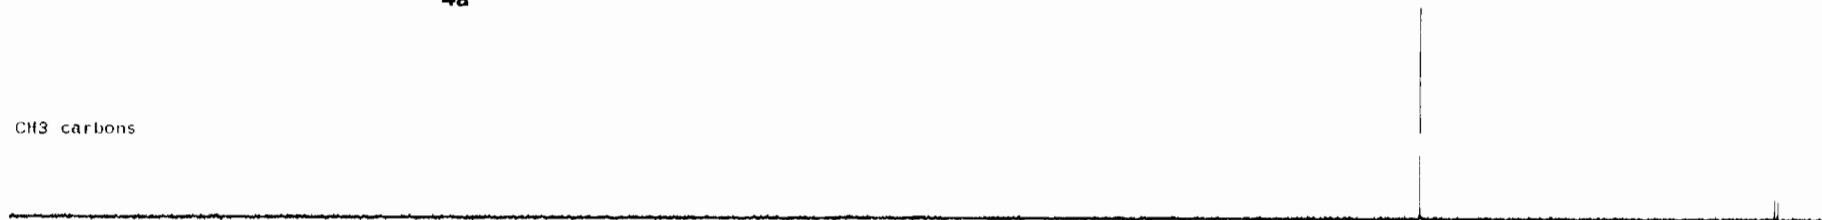

CH2 carbons

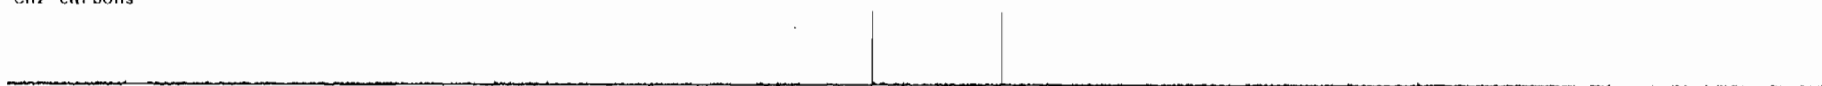

CH carbons

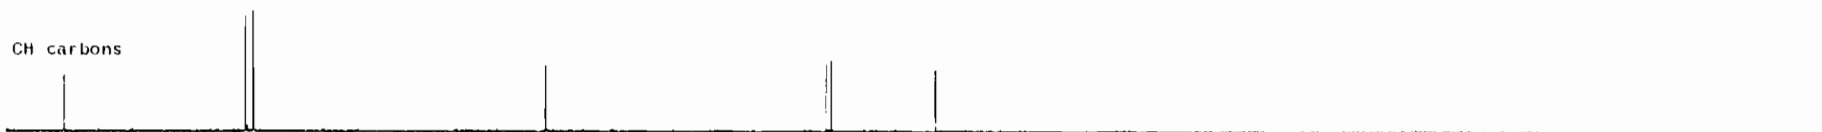

all protonated carbons

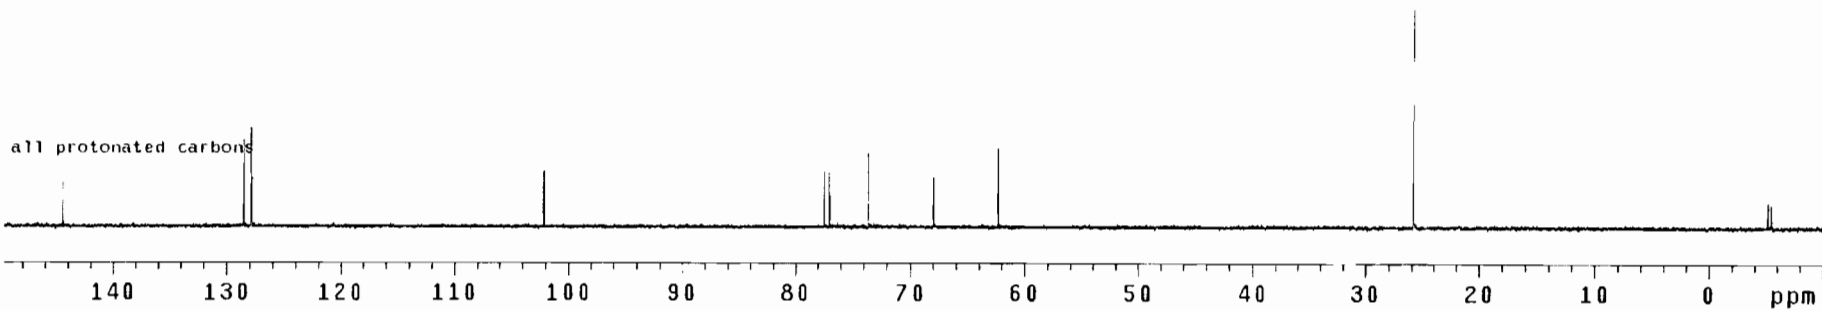

DHL-3\_3

Pulse Sequence: hetcor

Solvent: CDCl<sub>3</sub>

Ambient temperature

User: 1-14-87

UNITYplus-600 "tesla"

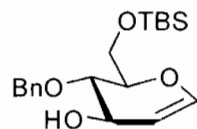

4a

Relax. delay 1.400 sec  
Acq. time 0.088 sec  
Width 23188.4 Hz  
2D Width 4730.4 Hz  
16 repetitions  
256 increments  
OBSERVE C13, 150.8409447 MHz  
DECOUPLE H1, 599.8862008 MHz  
Power 36 dB  
on during acquisition  
off during delay  
WALIZ-16 modulated  
DATA PROCESSING  
Line broadening 1.0 Hz  
F1 DATA PROCESSING  
Line broadening 0.3 Hz  
FT size 4096 x 1024  
Total time 1 hr, 45 min, 20 sec

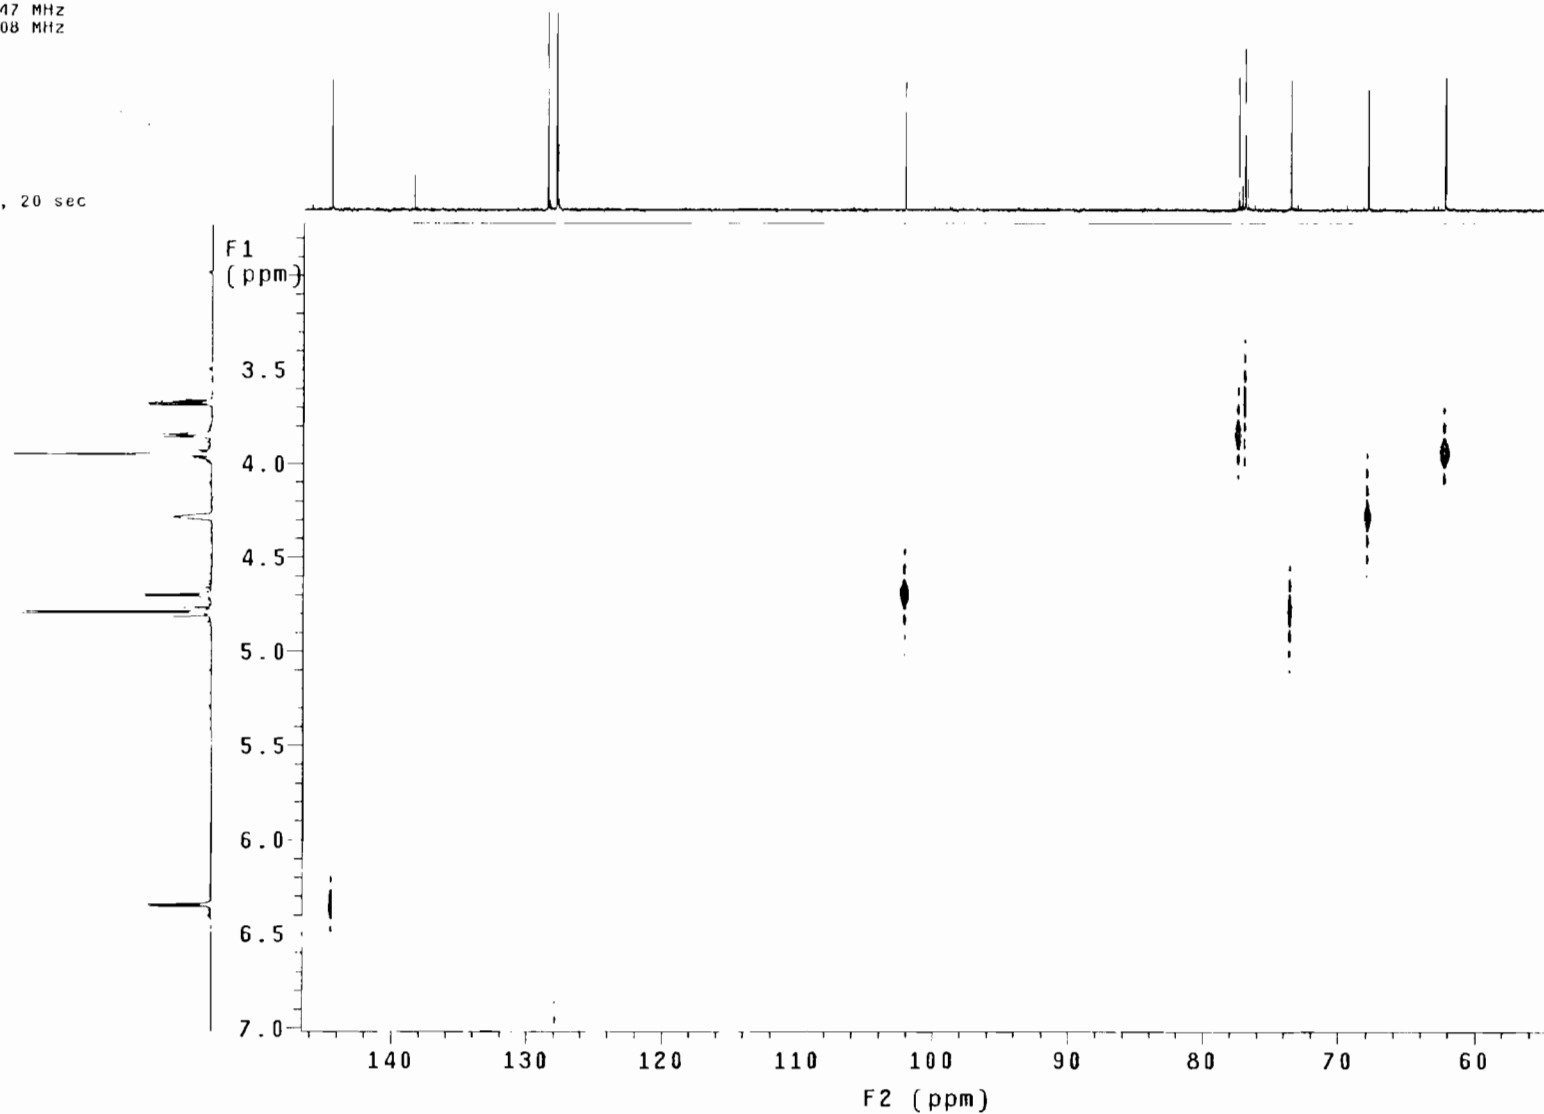

DHL-3

exp1 s2pu1

|             |             |            |             |
|-------------|-------------|------------|-------------|
| SAMPLE      |             | DEC. & VT  |             |
| date        | Jul 21 2006 | dfrq       | 499.864     |
| solvent     | CDC13       | dn         | H1          |
| file        | exp         | dpwr       | 30          |
| ACQUISITION |             | dof        | 0           |
| sfrq        | 499.864     | dm         | nnn         |
| tn          | H1          | dmm        | c           |
| at          | 5.016       | dmf        | 200         |
| np          | 65536       | dseq       |             |
| sw          | 6533.3      | dres       | 1.0         |
| fb          | 4000        | homo       | n           |
| bs          | 4           | DEC2       |             |
| tpwr        | 61          | dfrq2      | 0           |
| pw          | 13.5        | dn2        |             |
| d1          | 0.100       | dpwr2      | 1           |
| tof         | 269.9       | dof2       | 0           |
| nt          | 16          | dm2        | n           |
| ct          | 16          | dmm2       | c           |
| alock       | n           | dmf2       | 200         |
| gain        | not used    | dseq2      |             |
| FLAGS       |             | dres2      | 1.0         |
| il          | n           | homo2      | n           |
| in          | n           | DEC3       |             |
| dp          | y           | dfrq3      | 0           |
| hs          | nn          | dn3        |             |
| DISPLAY     |             | dpwr3      | 1           |
| sp          | -29.9       | dof3       | 0           |
| wp          | 5279.8      | dm3        | n           |
| vs          | 148         | dmm3       | c           |
| sc          | 0           | dmf3       | 200         |
| wc          | 250         | dseq3      |             |
| hzmm        | 21.12       | dres3      | 1.0         |
| is          | 200.00      | homo3      | n           |
| rfl         | 510.6       | PROCESSING |             |
| rfp         | 0           | wtfile     |             |
| th          | 7           | proc       | ft          |
| ins         | 6.000       | fn         | 65536       |
| ai          | ph          | math       | f           |
|             |             | werr       |             |
|             |             | wexp       | process plH |
|             |             | wbs        |             |
|             |             | wnt        | wft         |

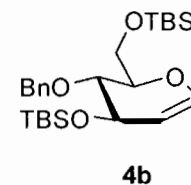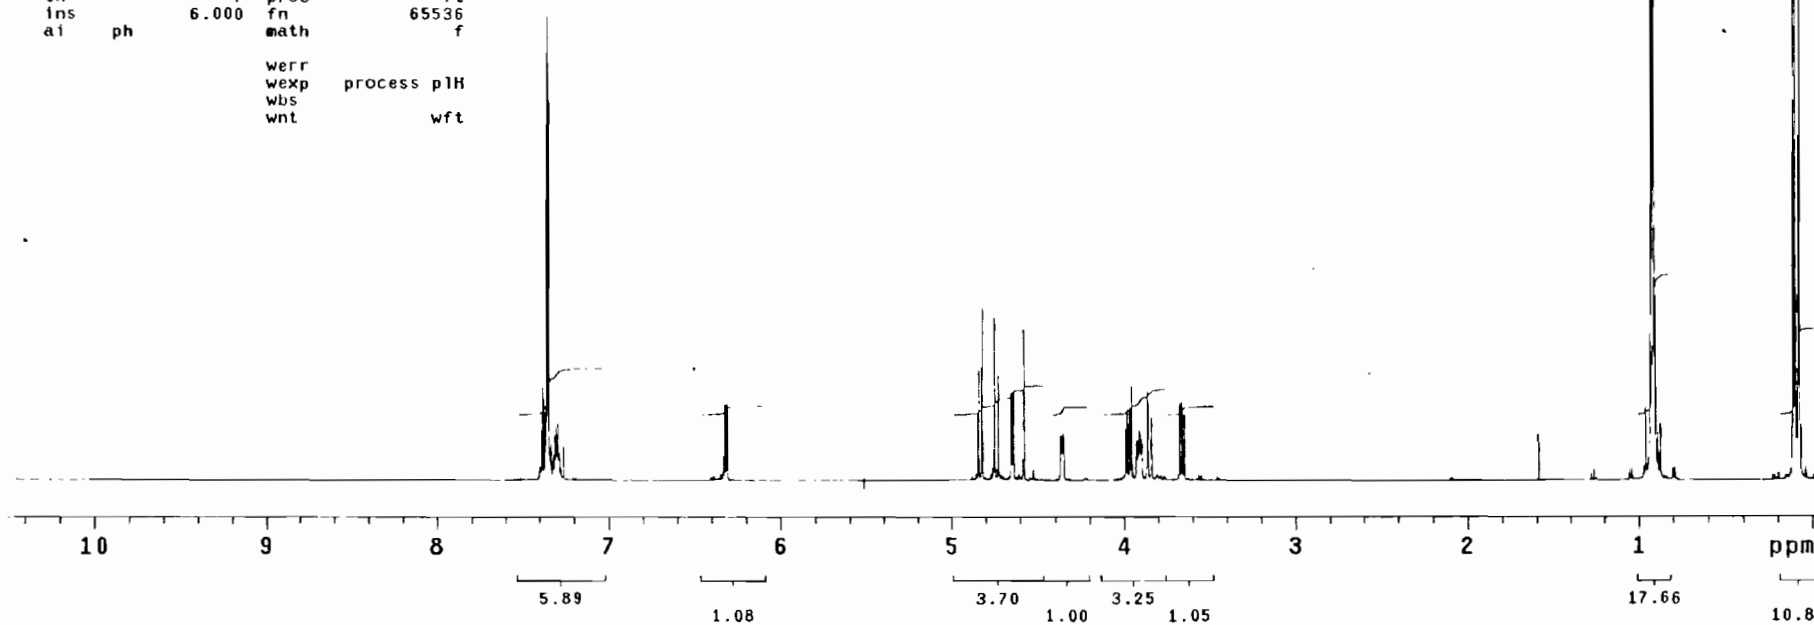

DHL-3

Pulse Sequence: relayh

Solvent: CDCl<sub>3</sub>

Ambient temperature

INOVA-500 "inova5"

Relax. delay 1.300 sec

COSY 90-90

Acq. time 0.130 sec

Width 3923.5 Hz

2D Width 3923.5 Hz

4 repetitions

256 increments

OBSERVE H1, 499.8611751 MHz

DATA PROCESSING

Sine bell 0.065 sec

F1 DATA PROCESSING

Sine bell 0.033 sec

FT size 1024 x 1024

Total time 25 min, 20 sec

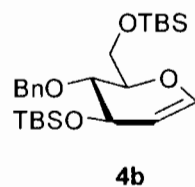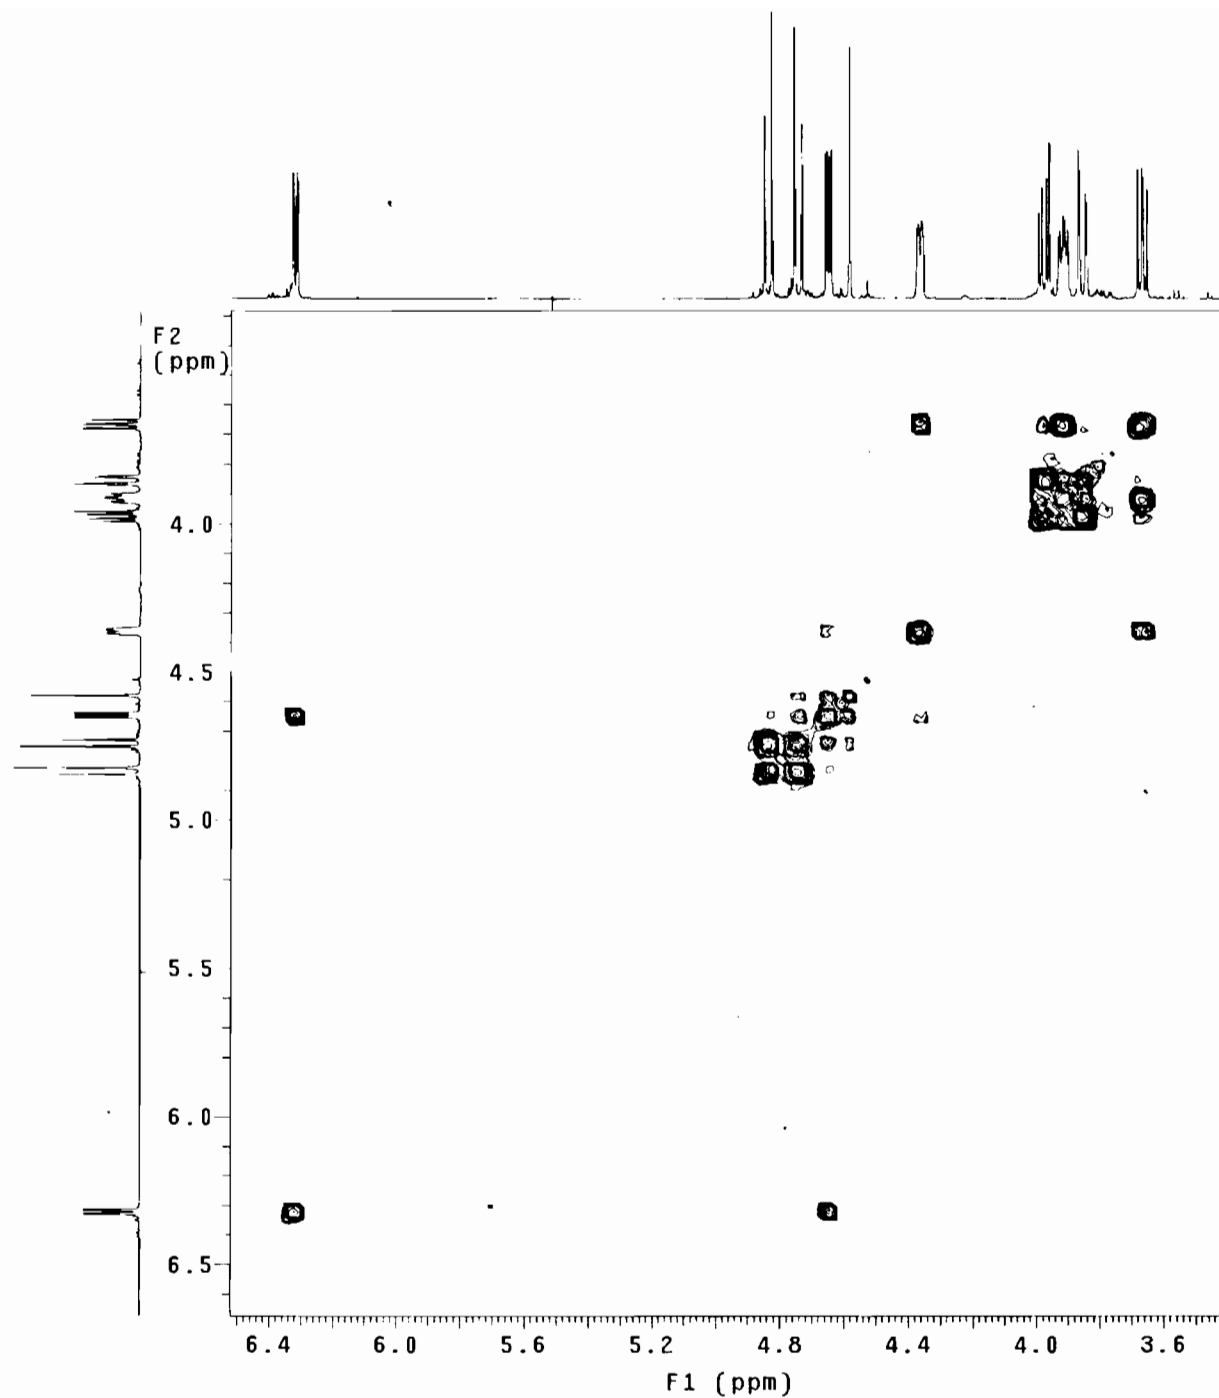

DHL-3

exp2 s2pu1

| SAMPLE      |             | DEC. & VT  |         |
|-------------|-------------|------------|---------|
| date        | Jul 21 2006 | dfrq       | 499.864 |
| solvent     | CDC13       | dn         | H1      |
| file        | exp         | dpwr       | 40      |
| ACQUISITION |             | dof        | 0       |
| sfrq        | 125.702     | dm         | yyy     |
| tn          | C13         | dmm        | w       |
| at          | 1.215       | dmf        | 8787.35 |
| np          | 65536       | dseq       |         |
| sw          | 26963.3     | dres       | 1.0     |
| fb          | 15000       | homo       | n       |
| bs          | 4           | DEC2       |         |
| tpwr        | 52          | dfrq2      | 0       |
| pw          | 10.2        | dn2        |         |
| d1          | 1.800       | dpwr2      | 1       |
| tof         | 144.5       | dof2       | 0       |
| nt          | 1200        | dm2        | n       |
| ct          | 116         | dmm2       | c       |
| alock       | n           | dmf2       | 10000   |
| gain        | not used    | dseq2      |         |
| FLAGS       |             | dres2      | 1.0     |
| tl          | n           | homo2      | n       |
| in          | n           | DEC3       |         |
| dp          | y           | dfrq3      | 0       |
| hs          | nn          | dn3        |         |
| DISPLAY     |             | dpwr3      | 1       |
| sp          | -1415.3     | dof3       | 0       |
| wp          | 26962.9     | dm3        | n       |
| vs          | 72          | dmm3       | c       |
| sc          | 0           | dmf3       | 10000   |
| wc          | 250         | dseq3      |         |
| hzmm        | 107.85      | dres3      | 1.0     |
| ls          | 500.00      | homo3      | n       |
| rfl         | 11110.2     | PROCESSING |         |
| rfp         | 9694.5      | lb         | 1.00    |
| th          | 4           | wtfile     |         |
| ins         | 100.000     | proc       | ft      |
| al          | cdc         | fn         | 131072  |
| ph          |             | math       | f       |

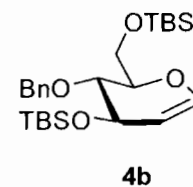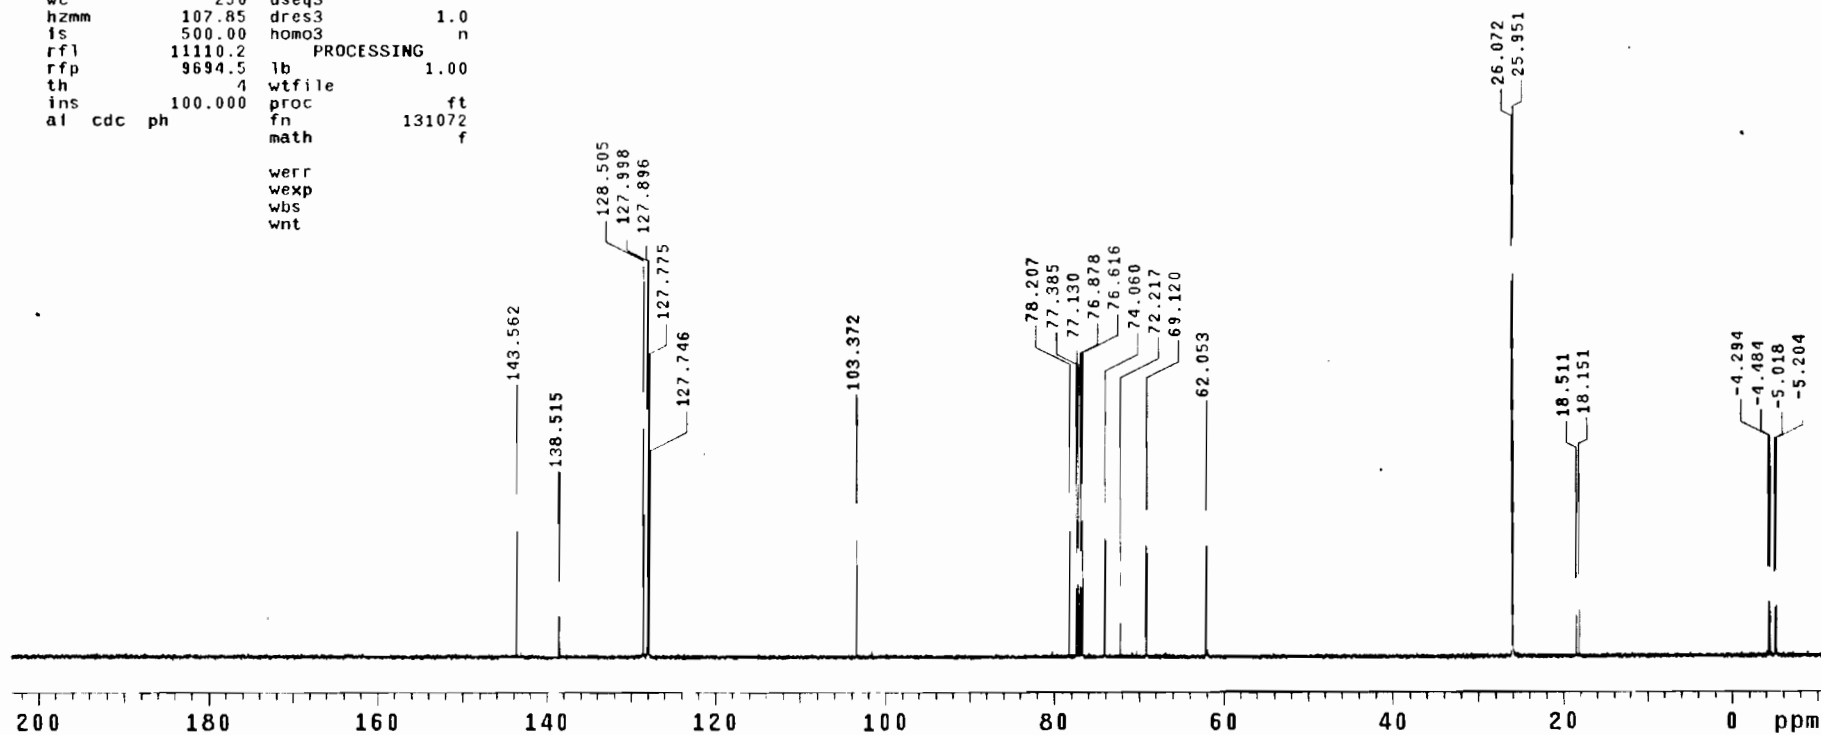

DHL-3

Pulse Sequence: dept

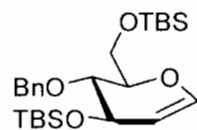

4b

CH3 carbons

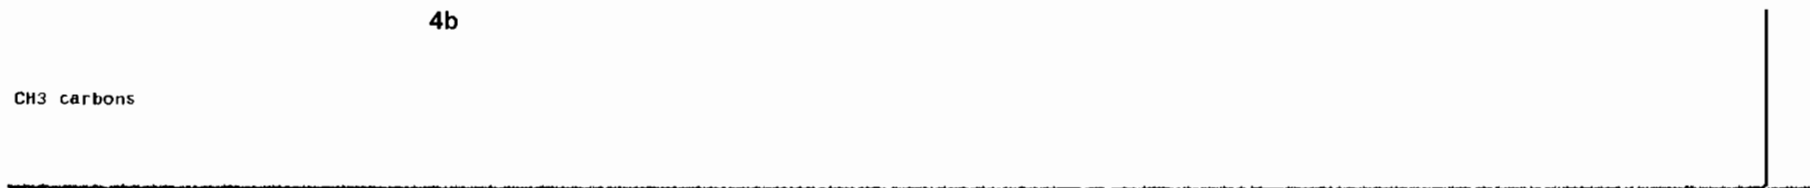

CH2 carbons

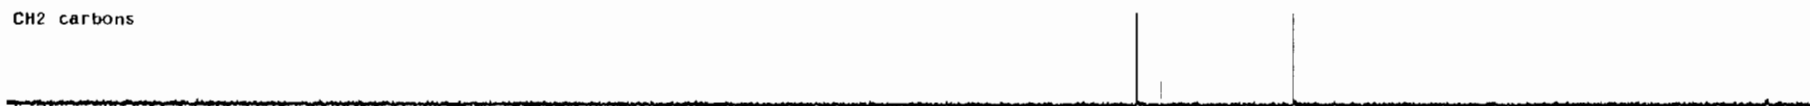

CH carbons

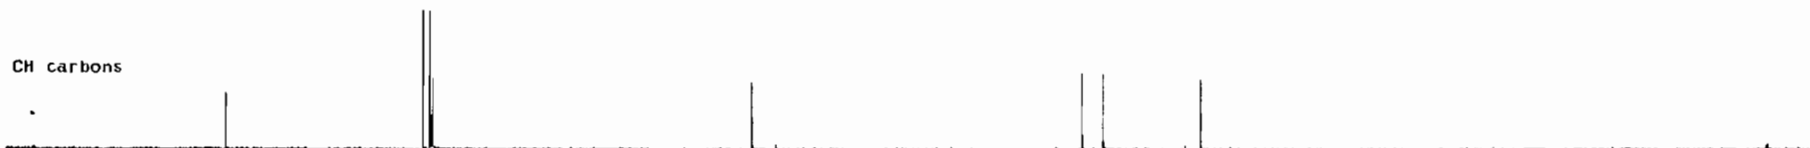

all protonated carbons

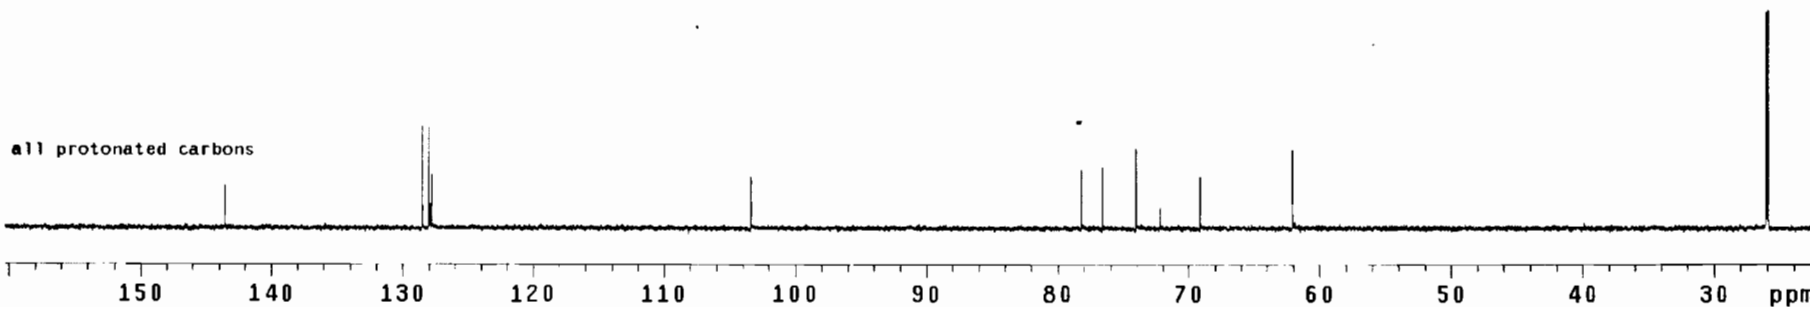

DHL-3

Pulse Sequence: hetcor

Solvent: CDCl<sub>3</sub>

Ambient temperature

User: 1-14-87

INOVA-500 "nmr2a.chem.nd.edu"

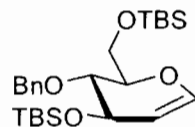

4b

Relax. delay 1.500 sec  
Acq. time 0.111 sec  
Width 18403.5 Hz  
2D Width 4026.4 Hz  
4 repetitions  
256 increments  
OBSERVE C13, 125.6901958 MHz  
DECOUPLE H1, 499.8630813 MHz  
Power 40 dB  
on during acquisition  
off during delay  
WALTZ-16 modulated  
DATA PROCESSING  
Line broadening 1.0 Hz  
F1 DATA PROCESSING  
Line broadening 0.3 Hz  
FT size 4096 x 1024  
Total time 28 min, 33 sec

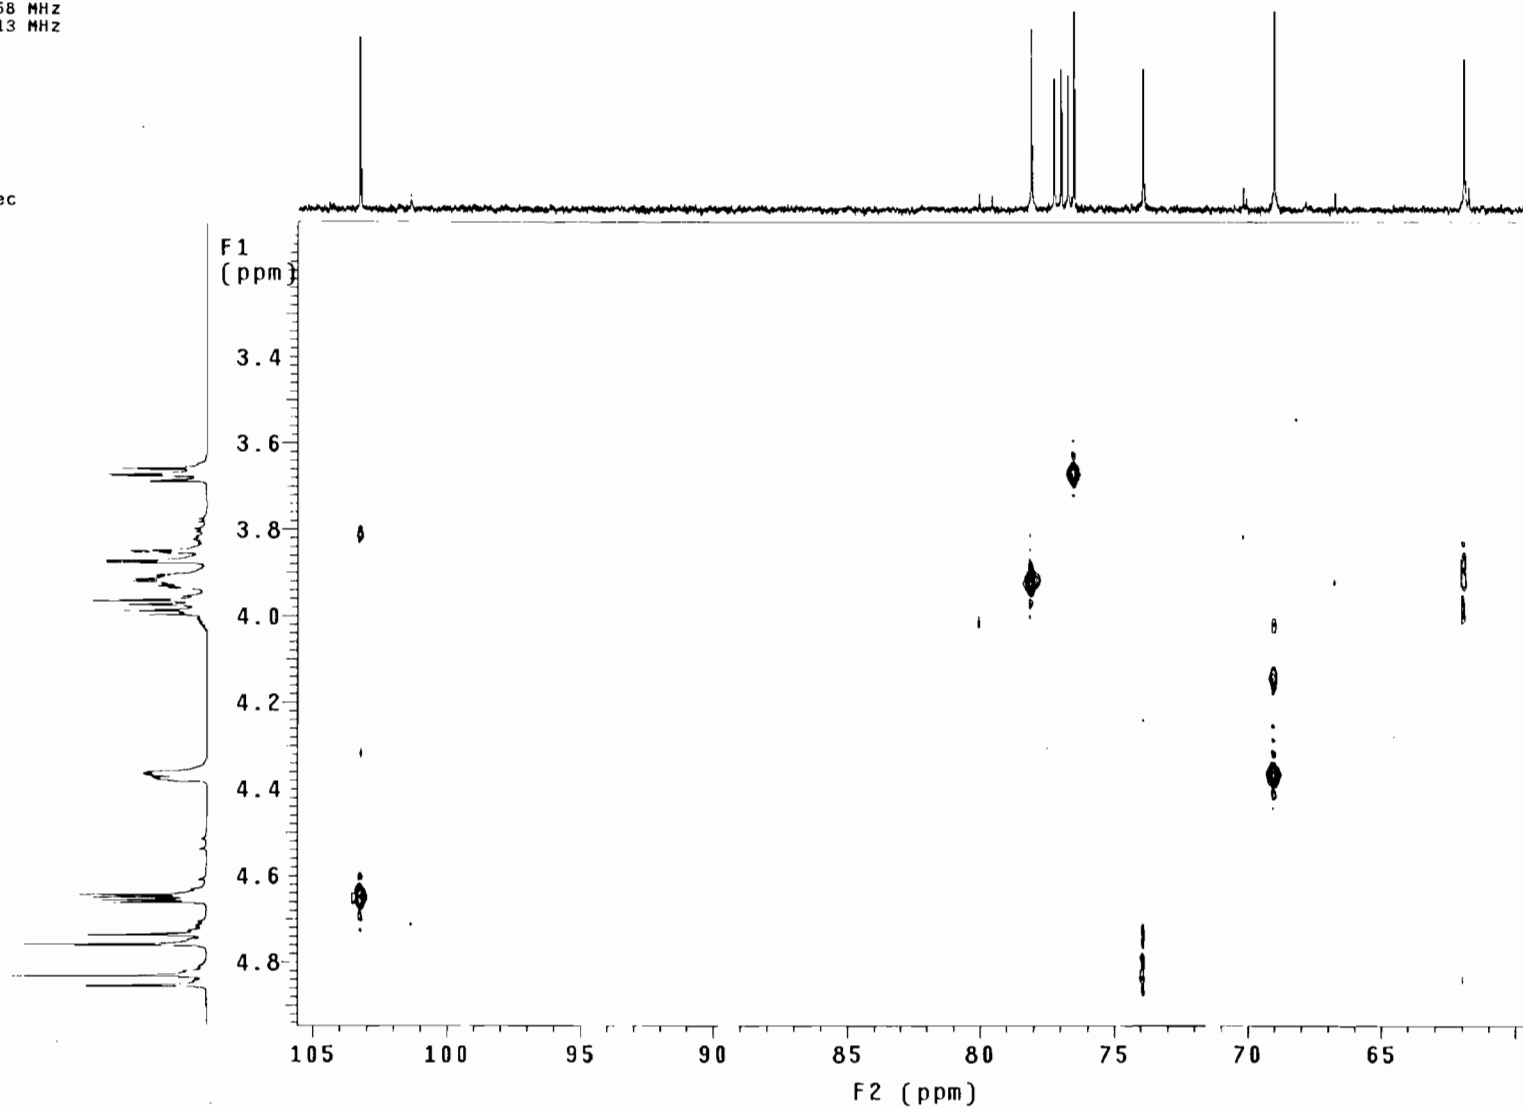

DHL-7

exp1 s2pu1

| SAMPLE      |            | DEC. & VT |            |
|-------------|------------|-----------|------------|
| date        | Oct 3 2006 | dfrq      | 499.866    |
| solvent     | CD3CN      | dn        | H1         |
| file        | exp        | dpwr      | 30         |
| ACQUISITION |            |           |            |
| sfrq        | 499.867    | dm        | nnn        |
| tn          | H1         | dmm       | c          |
| at          | 5.016      | dmf       | 200        |
| np          | 65536      | dseq      |            |
| sw          | 6533.3     | dres      | 1.0        |
| fb          | 4000       | homo      | n          |
| bs          | 4          |           |            |
| tpwr        | 61         | dfrq2     | 0          |
| pw          | 13.5       | dn2       |            |
| d1          | 0.100      | dpwr2     | 1          |
| tof         | 269.9      | dof2      | 0          |
| nt          | 16         | dm2       | n          |
| ct          | 16         | dmm2      | c          |
| alock       | n          | dmf2      | 200        |
| gain        | not used   | dseq2     |            |
| il          | n          | dres2     | 1.0        |
| in          | n          | homo2     | n          |
| dp          | y          | dfrq3     | 0          |
| hs          | nn         | dn3       |            |
| DISPLAY     |            |           |            |
| sp          | 909.7      | dpwr3     | 1          |
| wp          | 3966.5     | dof3      | 0          |
| vs          | 158        | dm3       | n          |
| sc          | 0          | dmm3      | c          |
| wc          | 250        | dmf3      | 200        |
| hzmm        | 15.87      | dseq3     |            |
| ls          | 200.00     | dres3     | 1.0        |
| rfl         | 463.5      | homo3     | n          |
| PROCESSING  |            |           |            |
| rfp         | 0          | wtfile    | ft         |
| th          | 7          | proc      |            |
| ins         | 1.000      | fn        | 65536      |
| ai          | ph         | math      | f          |
|             |            | werr      |            |
|             |            | wexp      | process pH |
|             |            | wbs       |            |
|             |            | wnt       | wft        |

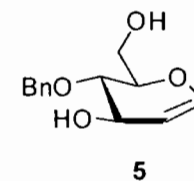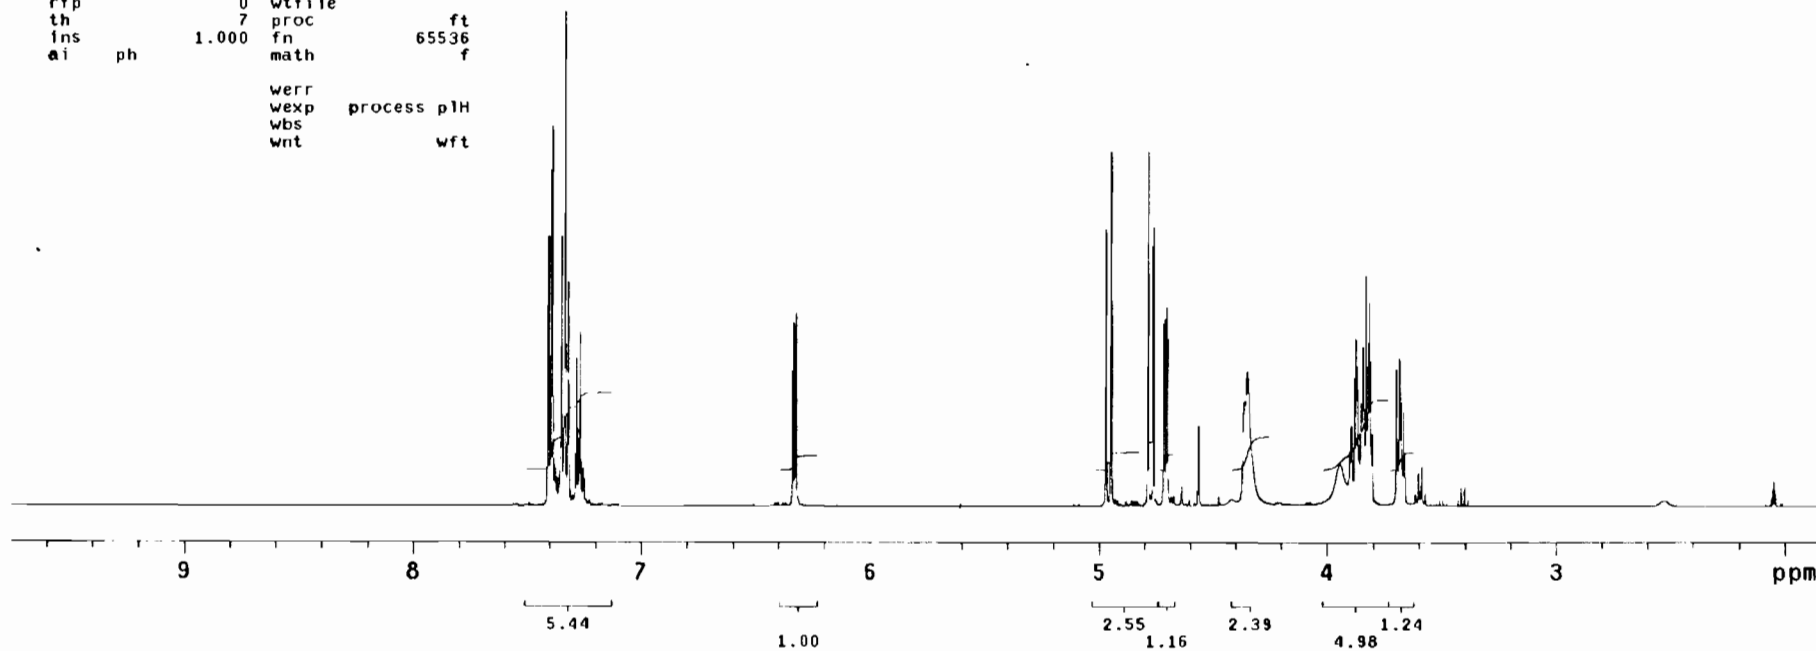

DHL-7

Pulse Sequence: relayh

Solvent: CD3CN

Ambient temperature

INOVA-500 "inova5"

Relax. delay 1.300 sec

COSY 90-90

Acq. time 0.236 sec

Width 2168.3 Hz

2D Width 2168.3 Hz

4 repetitions

128 increments

OBSERVE H1, 499.8637722 MHz

DATA PROCESSING

Sine bell 0.118 sec

F1 DATA PROCESSING

Sine bell 0.059 sec

FT size 1024 x 1024

Total time 13 min, 39 sec

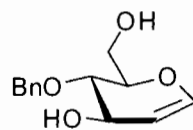

5

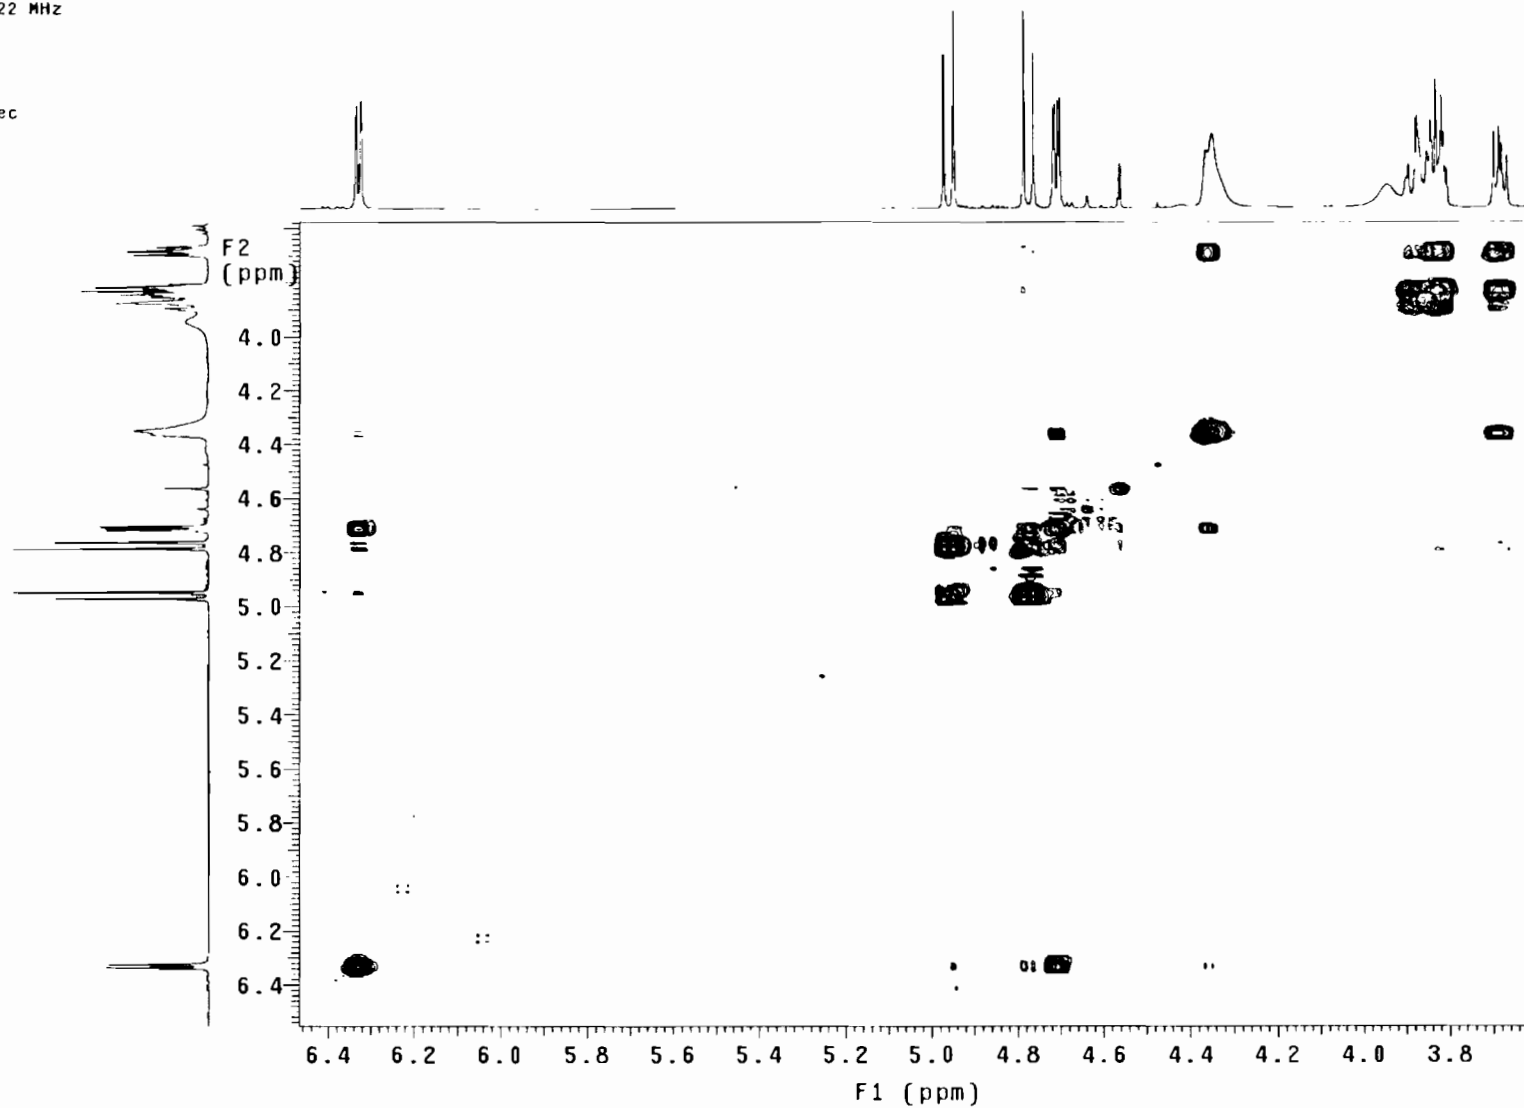

DHL-7

exp2 s2pu1

| SAMPLE      |            | DEC. & VT  |         |
|-------------|------------|------------|---------|
| date        | Oct 3 2006 | dfrq       | 499.866 |
| solvent     | Acetone    | dn         | H1      |
| file        | exp        | dpwr       | 40      |
| ACQUISITION |            | dof        | 0       |
| sfrq        | 125.703    | dm         | yyy     |
| tn          | C13        | dmm        | w       |
| at          | 1.215      | dmf        | 8787.35 |
| np          | 65536      | dseq       |         |
| sw          | 26963.3    | dres       | 1.0     |
| fb          | 15000      | homo       | n       |
| bs          | 4          | DEC2       |         |
| tpwr        | 52         | dfrq2      | 0       |
| pw          | 10.2       | dn2        |         |
| d1          | 1.800      | dpwr2      | 1       |
| tof         | 144.5      | dof2       | 0       |
| nt          | 1200       | dm2        | n       |
| ct          | 44         | dmm2       | c       |
| alock       |            | dmf2       | 10000   |
| gain        | not used   | dseq2      |         |
| FLAGS       |            | dres2      | 1.0     |
| il          | n          | homo2      | n       |
| in          | n          | DEC3       |         |
| dp          | y          | dfrq3      | 0       |
| hs          | nn         | dn3        |         |
| DISPLAY     |            | dpwr3      | 1       |
| sp          | 3378.4     | dof3       | 0       |
| wp          | 21683.8    | dm3        | n       |
| vs          | 27         | dmm3       | c       |
| sc          | 0          | dmf3       | 10000   |
| wc          | 250        | dseq3      |         |
| hzmm        | 86.74      | dres3      | 1.0     |
| is          | 500.00     | homo3      | n       |
| rfl         | 5091.8     | PROCESSING |         |
| rfp         | 3758.2     | lb         | 1.00    |
| th          | 8          | wtfile     |         |
| ins         | 100.000    | proc       | ft      |
| ai          | cdc ph     | fn         | 131072  |
|             |            | math       | f       |

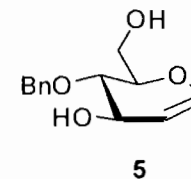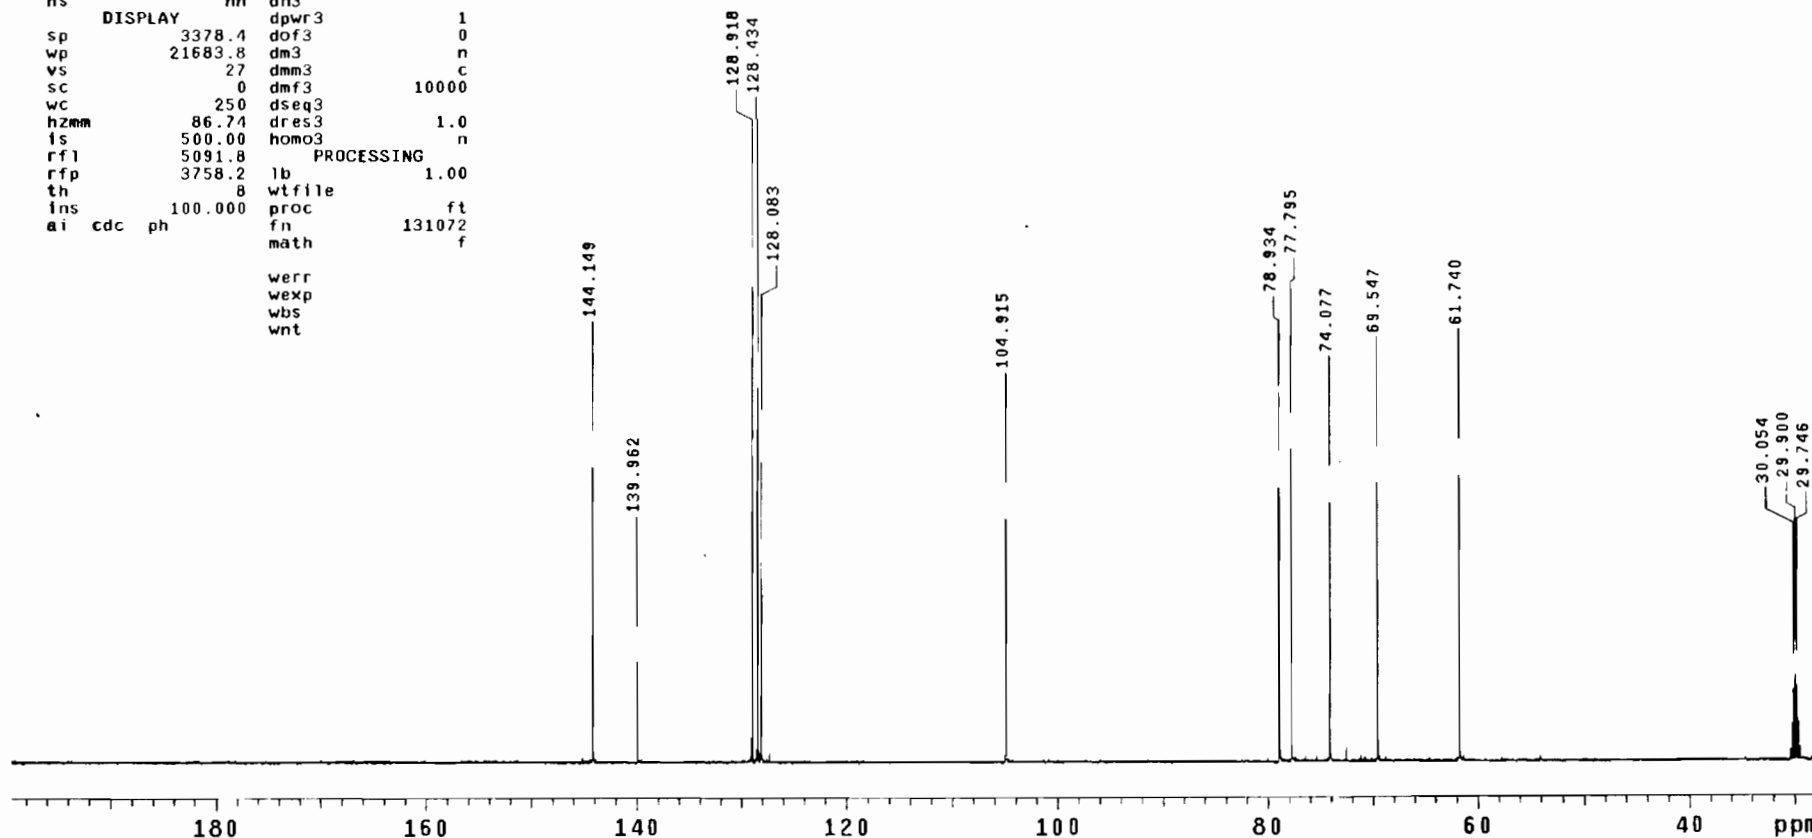

DHL-7

Pulse Sequence: dept

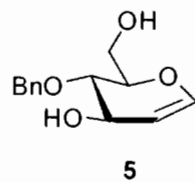

CH3 carbons

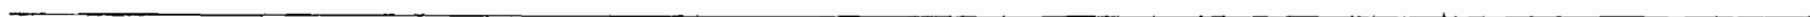

CH2 carbons

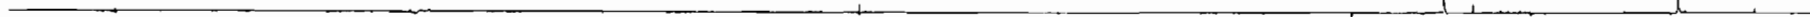

CH carbons <sup>CH</sup>

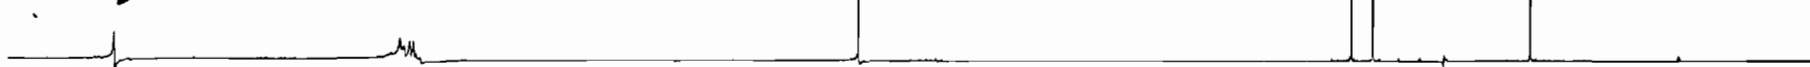

all protonated carbons

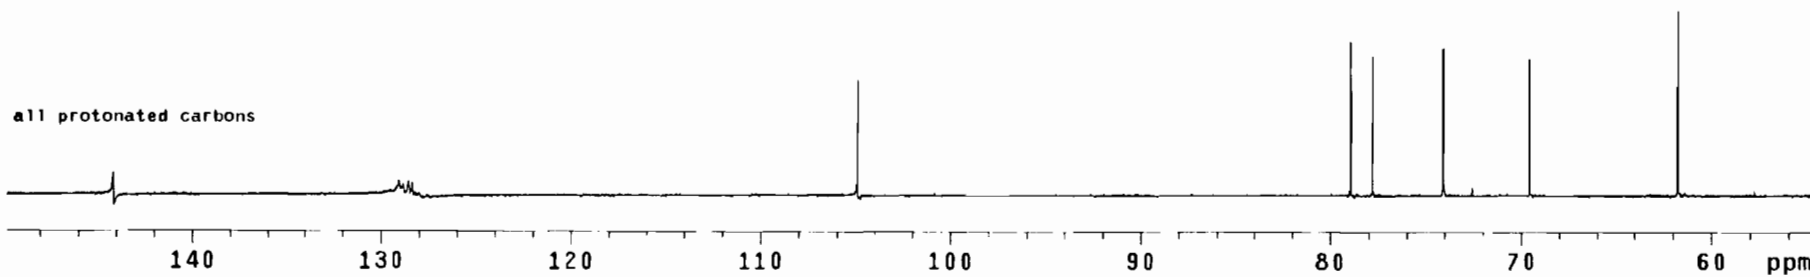

DHL-7

Pulse Sequence: hetcor

Solvent: Acetone

Ambient temperature

User: 1-14-87

File: DHL-7-HC

INOVA-500 "inova5"

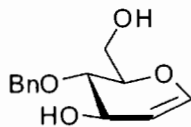

5

Relax. delay 1.500 sec

Acq. time 0.111 sec

Width 18403.5 Hz

2D Width 2131.7 Hz

4 repetitions

128 increments

OBSERVE C13, 125.6907522 MHz

DECOUPLE H1, 499.8664744 MHz

Power 40 dB

on during acquisition

off during delay

WALTZ-16 modulated

DATA PROCESSING

Line broadening 1.0 Hz

F1 DATA PROCESSING

Line broadening 0.3 Hz

FT size 4096 x 512

Total time 14 min, 19 sec

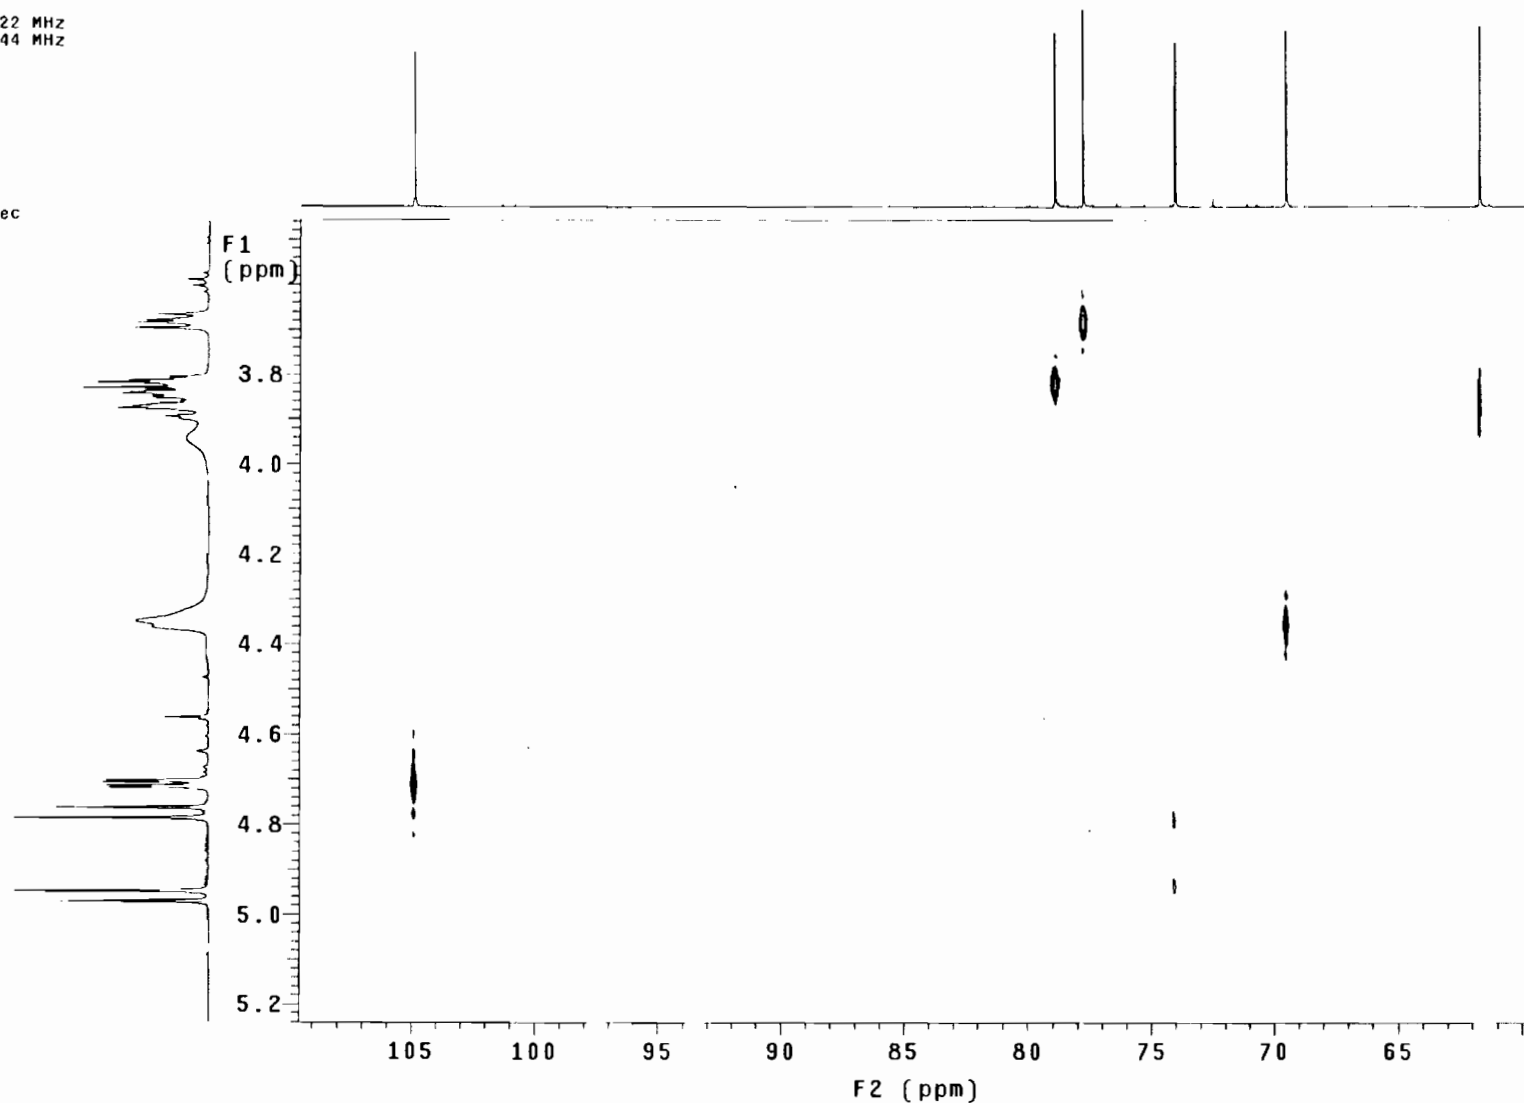

DHL-6

exp1 s2pul

| SAMPLE      |            | DEC. & VT  |            |
|-------------|------------|------------|------------|
| date        | Oct 6 2006 | dfrq       | 499.864    |
| solvent     | CDC13      | dn         | H1         |
| file        | exp        | dpwr       | 30         |
| ACQUISITION |            |            |            |
| sfrq        | 499.864    | dof        | 0          |
| tn          | H1         | dm         | nnn        |
| at          | 5.016      | dmm        | c          |
| np          | 65536      | dmf        | 200        |
| sw          | 6533.3     | dseq       |            |
| fb          | 4000       | dres       | 1.0        |
| bs          | 4          | homo       | n          |
| tpwr        | 61         | DEC2       | 0          |
| pw          | 13.5       | dfrq2      |            |
| d1          | 0.100      | dn2        |            |
| tof         | 269.9      | dpwr2      | 1          |
| nt          | 16         | dof2       | 0          |
| ct          | 16         | dm2        | n          |
| alock       | n          | dmm2       | c          |
| gain        | not used   | dmf2       | 200        |
| il          | n          | dseq2      |            |
| in          | n          | dres2      | 1.0        |
| dp          | y          | homo2      | n          |
| hs          | nn         | DEC3       | 0          |
| DISPLAY     |            |            |            |
| sp          | 1292.2     | dfrq3      |            |
| wp          | 3648.7     | dn3        |            |
| vs          | 59         | dpwr3      | 1          |
| sc          | 0          | dof3       | 0          |
| wc          | 250        | dm3        | n          |
| hzmm        | 14.59      | dmm3       | c          |
| is          | 100.00     | dmf3       | 200        |
| rfl         | 510.6      | dseq3      |            |
| rfp         | 0          | dres3      | 1.0        |
| th          | 7          | homo3      | n          |
| ins         | 1.000      | PROCESSING |            |
| al          | ph         | wtfile     |            |
|             |            | proc       | ft         |
|             |            | fn         | 65536      |
|             |            | math       | f          |
|             |            | werr       |            |
|             |            | wexp       | process pH |
|             |            | wbs        |            |
|             |            | wnt        | wft        |

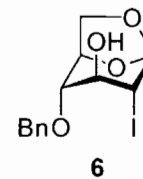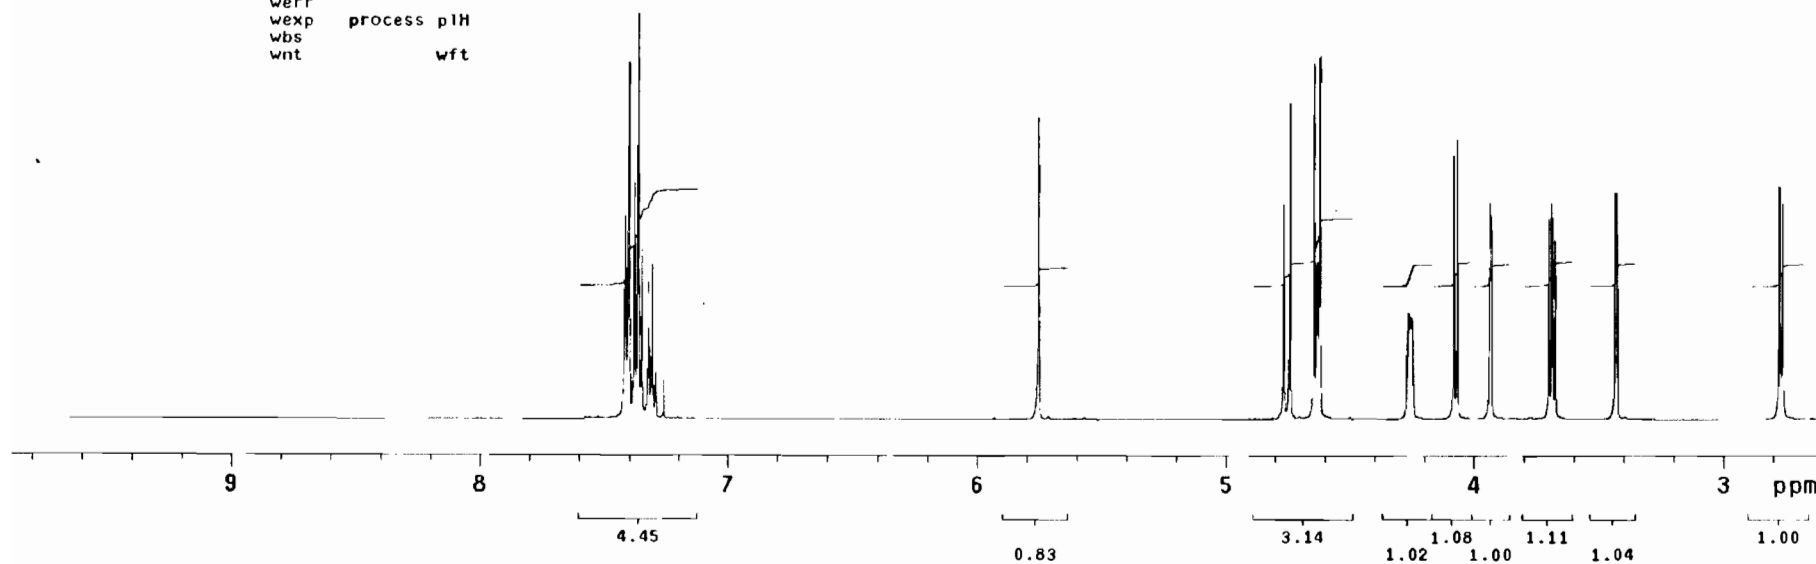

DHL-6

Pulse Sequence: relayh

Solvent: CDC13  
Ambient temperature  
INOVA-500 "inova5"

Relax. delay 1.300 sec  
COSY 90-90  
Acq. time 0.203 sec  
Width 2526.4 Hz  
2D Width 2526.4 Hz  
8 repetitions  
256 increments  
OBSERVE H1, 499.8611751 MHz  
DATA PROCESSING  
Sine bell 0.101 sec  
F1 DATA PROCESSING  
Sine bell 0.051 sec  
FT size 1024 x 1024  
Total time 53 min, 34 sec

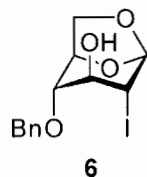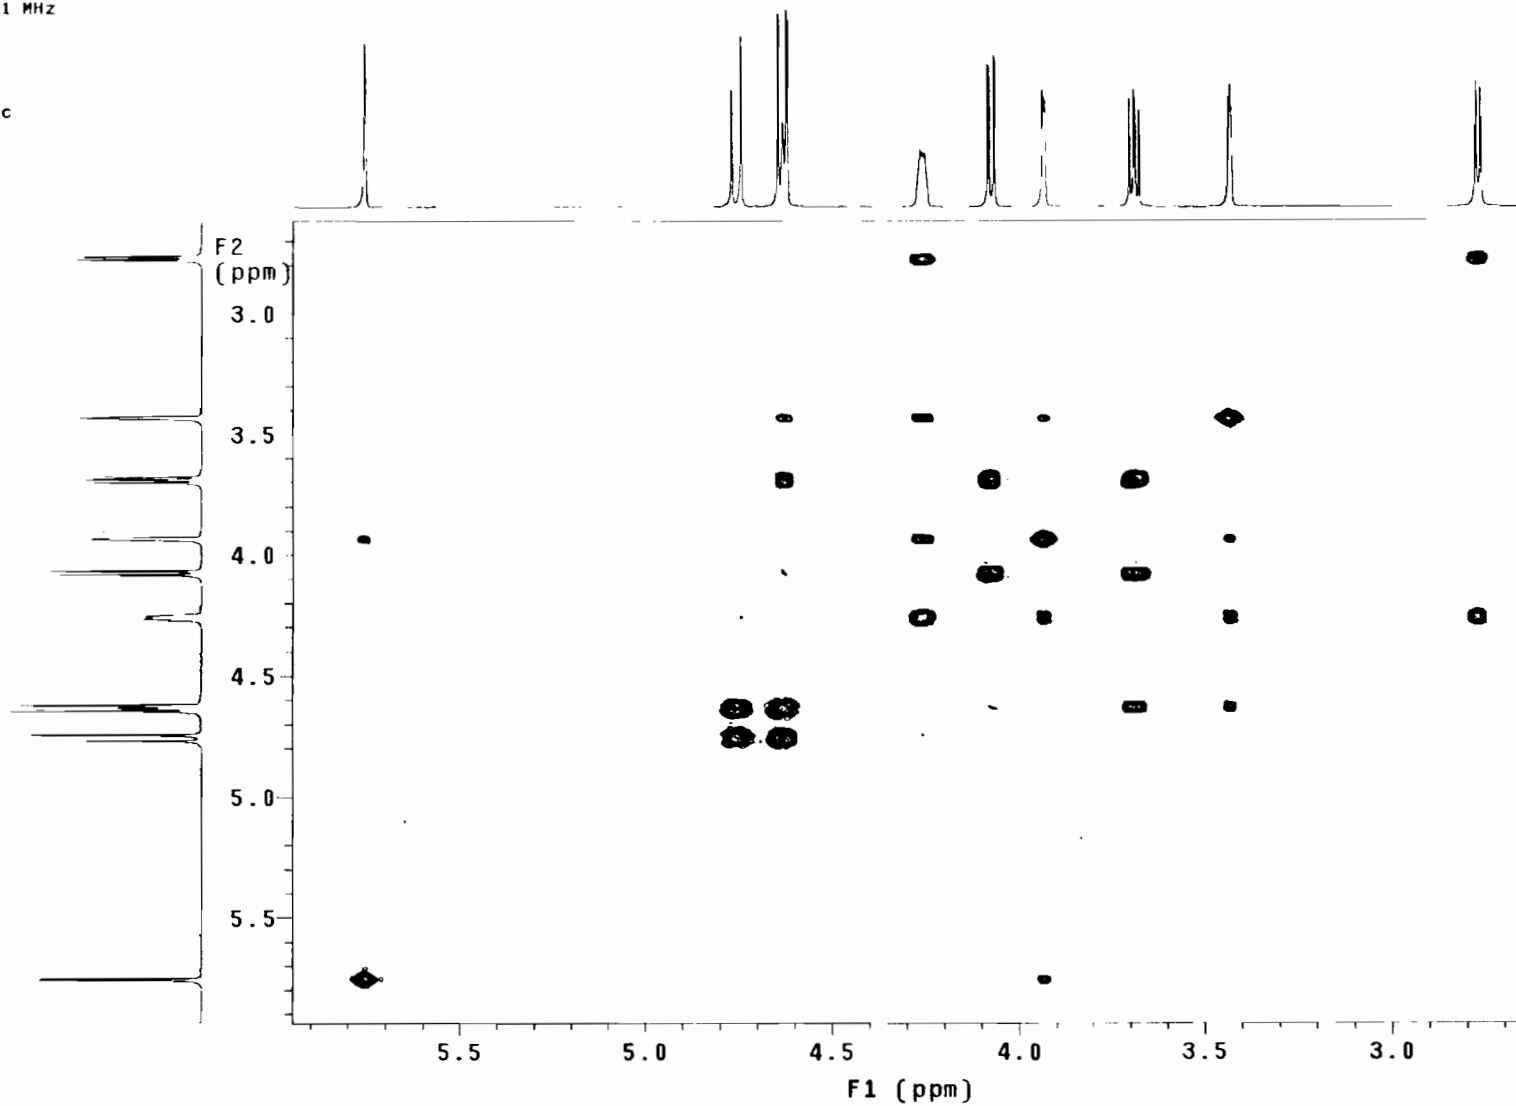

DHL-6

exp3 s2pul

SAMPLE DEC. & VT  
date Oct 6 2006 dfrq 499.864  
solvent CDC13 dn H1  
file exp dpwr 40  
ACQUISITION dof 0  
sfrq 125.702 dm yyy  
tn C13 dmm w  
at 1.215 dmf 8787.35  
np 65536 dseq  
sw 26963.3 dres 1.0  
fb 15000 homo n  
bs 4 DEC2  
tpwr 52 dfrq2 0  
pw 10.2 dn2  
dl 1.800 dpwr2 1  
tof 144.5 dof2 0  
nt 1200 dm2 n  
ct 88 dmm2 c  
alock n dmf2 10000  
gain not used dseq2  
FLAGS n dres2 1.0  
n homo2 n  
in n DEC3  
dp y dfrq3 0  
hs nn dn3  
DISPLAY dpwr3 1  
sp 3023.7 dof3 0  
wp 17963.3 dm3 n  
vs 61 dmm3 c  
sc 0 dmf3 10000  
wc 250 dseq3  
hzmm 71.85 dres3 1.0  
ls 500.00 homo3 n  
rfl 11118.4  
rfp 9678.1  
th 5  
ins 100.000  
ai cdc ph  
PROCESSING  
lb 1.00  
wtfile ft  
proc 131072  
fn f  
math

werr  
wexp  
wbs  
wnt

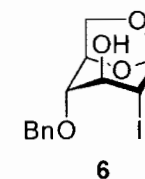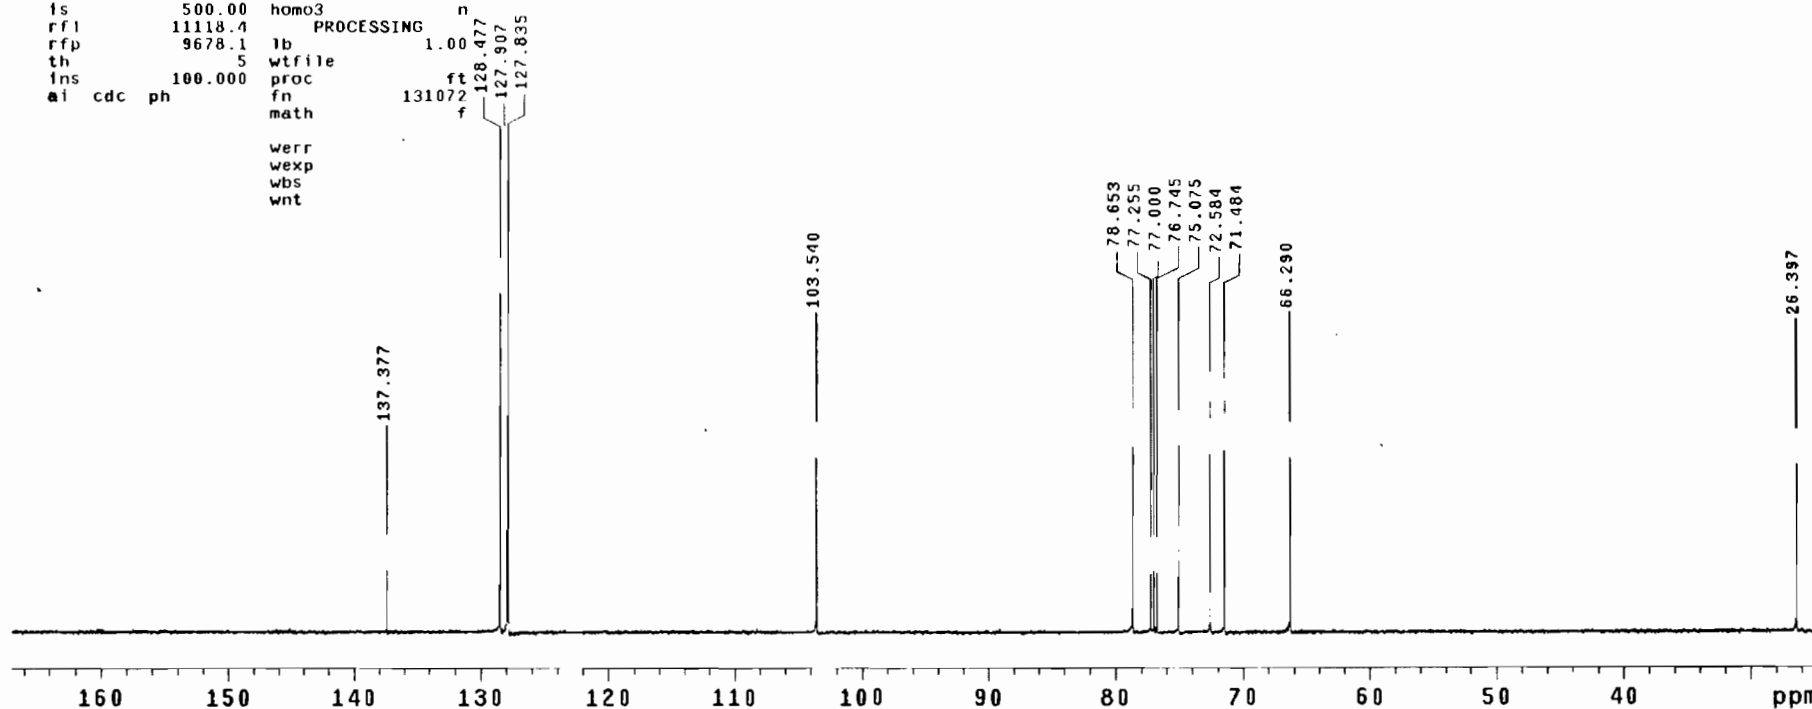

DHL-6

Pulse Sequence: dept

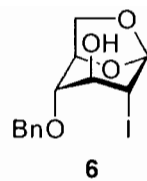

CH3 carbons

CH2 carbons

CH carbons

all protonated carbons

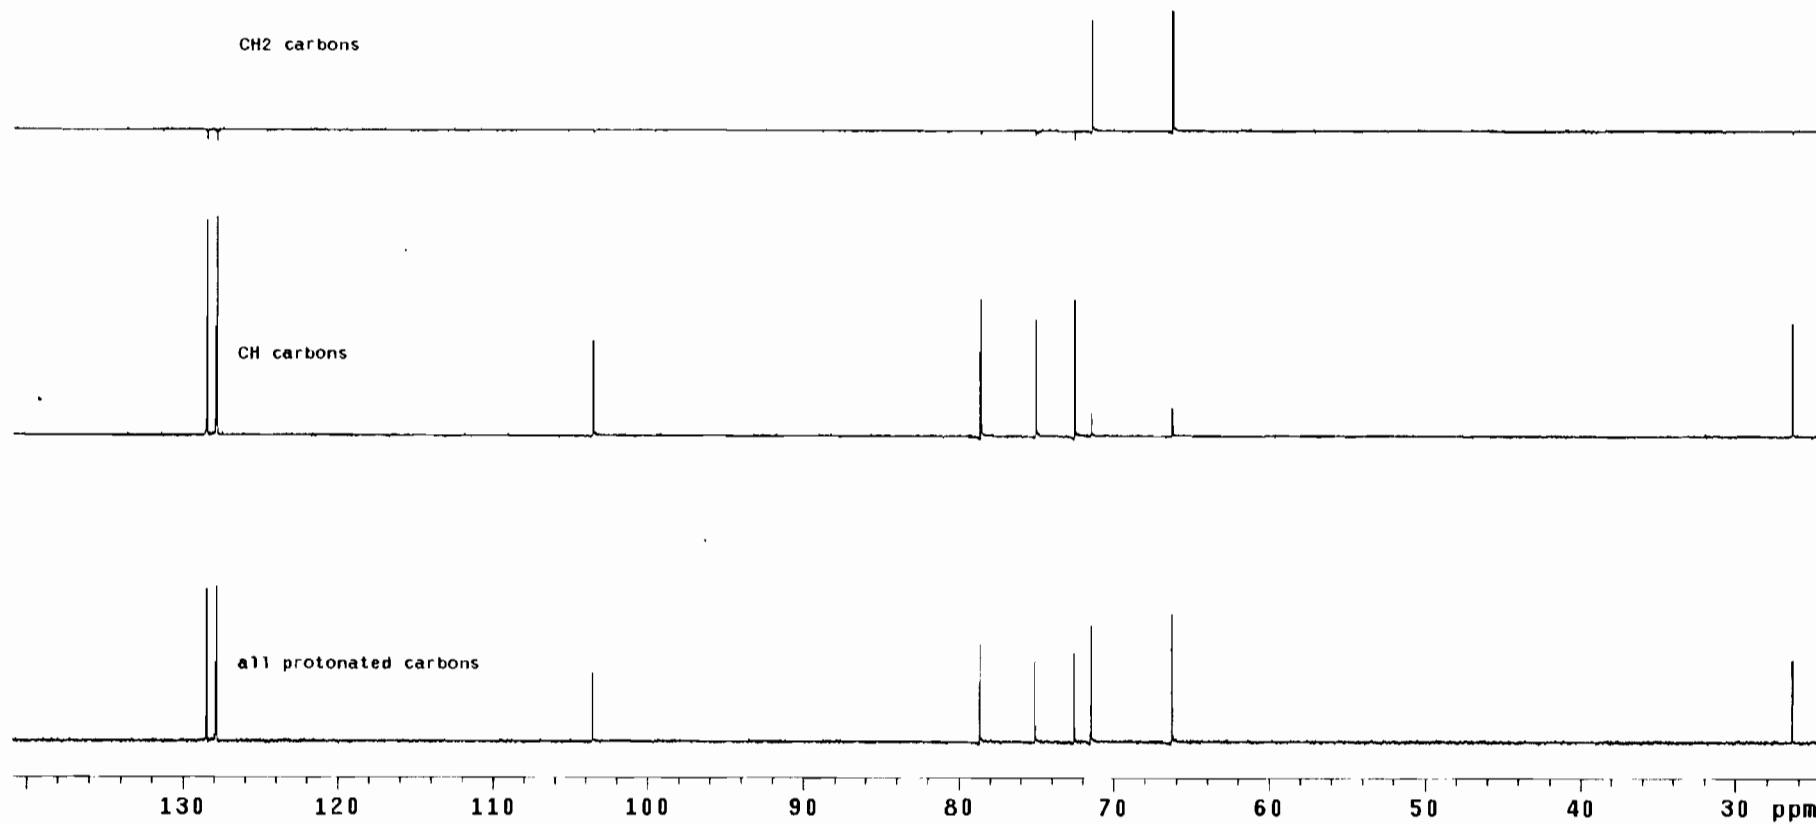

DHL-6

Pulse Sequence: hetcor

Solvent: CDCl<sub>3</sub>

Ambient temperature

User: 1-14-87

File: DHL-6-HC

INOVA-500 "inova5"

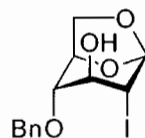

Relax. delay 1.500 sec

Acq. time 0.111 sec

Width 18403.5 Hz

2D Width 2651.4 Hz

8 repetitions

128 increments

OBSERVE C13, 125.6902043 MHz

DECOUPLE H1, 499.8637978 MHz

Power 40 dB

on during acquisition

off during delay

WALTZ-16 modulated

DATA PROCESSING

Line broadening 1.0 Hz

F1 DATA PROCESSING

Line broadening 0.3 Hz

FT size 4096 x 512

Total time 28 min, 25 sec

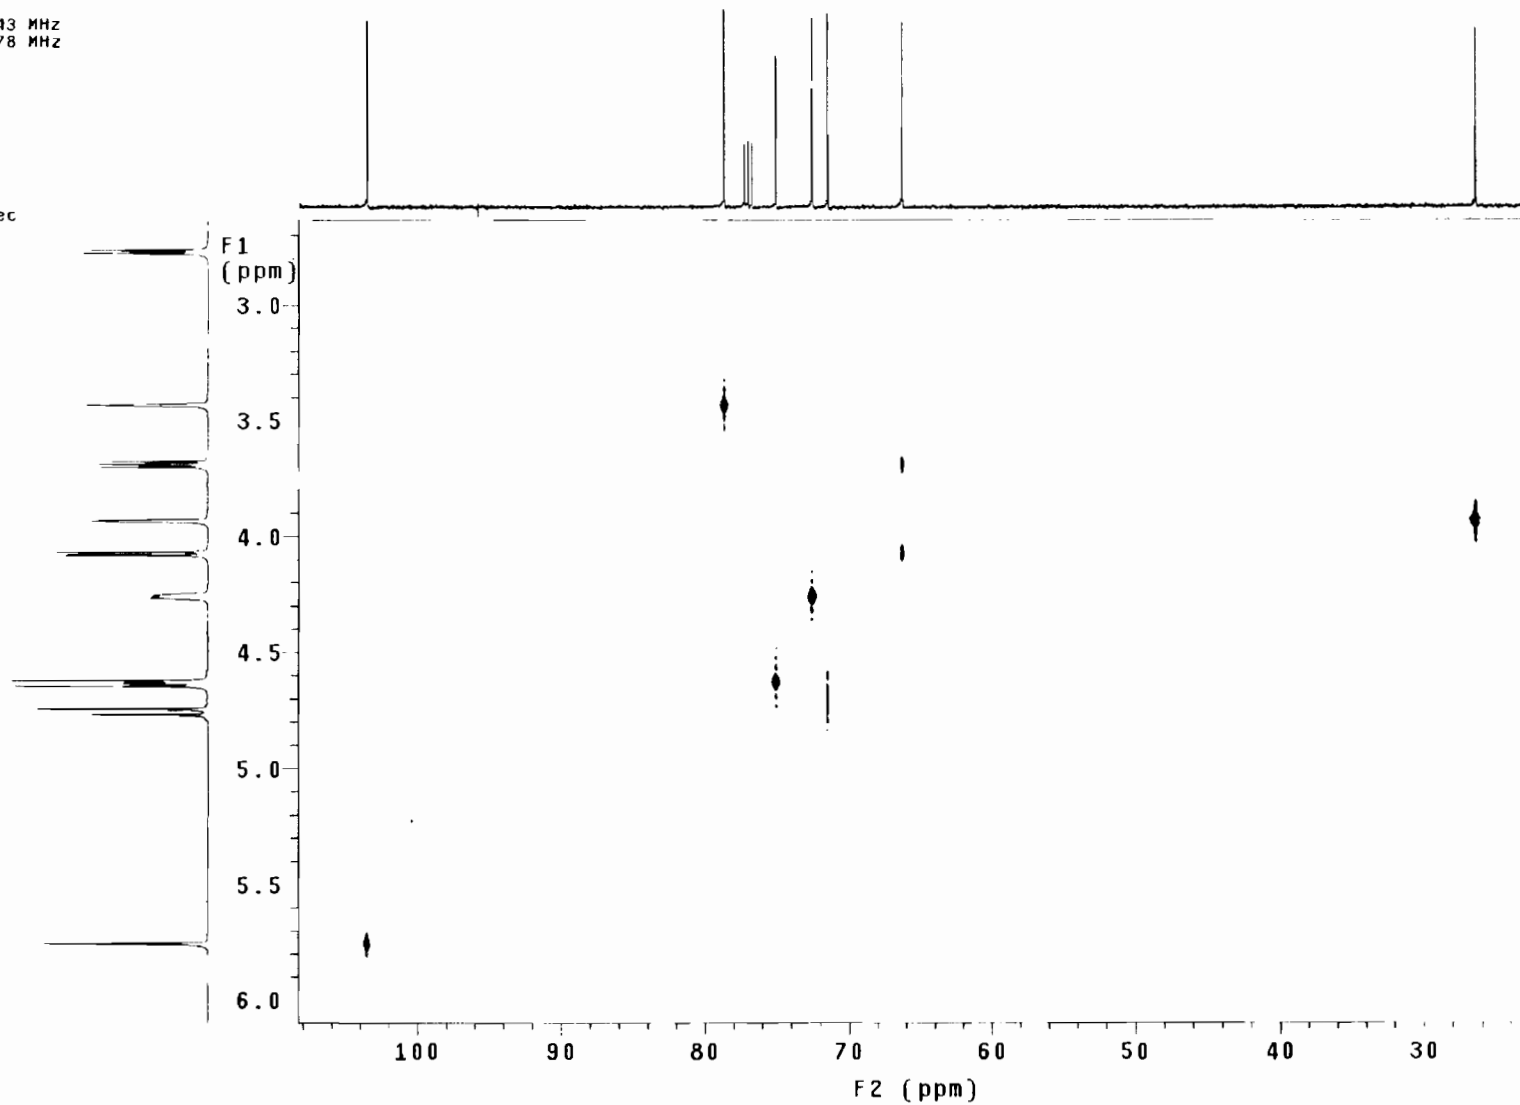

DHL-12

exp1 s2pu1

|             |             |            |            |
|-------------|-------------|------------|------------|
| SAMPLE      |             | DEC. & VT  |            |
| date        | Sep 21 2006 | dfrq       | 499.864    |
| solvent     | CDC13       | dn         | H1         |
| file        | exp         | dpwr       | 30         |
| ACQUISITION |             | dof        | 0          |
| sfrq        | 499.864     | dm         | nnn        |
| tn          | H1          | dmm        | c          |
| at          | 5.016       | dmf        | 200        |
| np          | 65536       | dseq       |            |
| sw          | 6533.3      | dres       | 1.0        |
| fb          | 4000        | homo       | n          |
| bs          | 4           | DEC2       |            |
| tpwr        | 61          | dfrq2      | 0          |
| pw          | 13.5        | dn2        |            |
| d1          | 0.100       | dpwr2      | 1          |
| tof         | 269.9       | dof2       | 0          |
| nt          | 16          | dm2        | n          |
| ct          | 16          | dmm2       | c          |
| alock       | n           | dmf2       | 200        |
| gain        | not used    | dseq2      |            |
| FLAGS       |             | dres2      | 1.0        |
| l1          | n           | homo2      | n          |
| in          | n           | DEC3       |            |
| dp          | y           | dfrq3      | 0          |
| hs          | nn          | dn3        |            |
| DISPLAY     |             | dpwr3      | 1          |
| sp          | 1498.2      | dof3       | 0          |
| wp          | 3184.9      | dm3        | n          |
| vs          | 71          | dmm3       | c          |
| sc          | 0           | dmf3       | 200        |
| wc          | 250         | dseq3      |            |
| h2mm        | 12.74       | dres3      | 1.0        |
| is          | 150.00      | homo3      | n          |
| rfl         | 510.6       | PROCESSING |            |
| rfp         | 0           | wtfile     |            |
| th          | 7           | proc       | ft         |
| ins         | 1.000       | fn         | 65536      |
| ai          | ph          | math       | f          |
|             |             | werr       |            |
|             |             | wexp       | process pH |
|             |             | wbs        |            |
|             |             | wnt        | wft        |

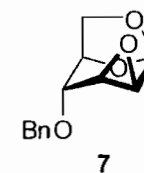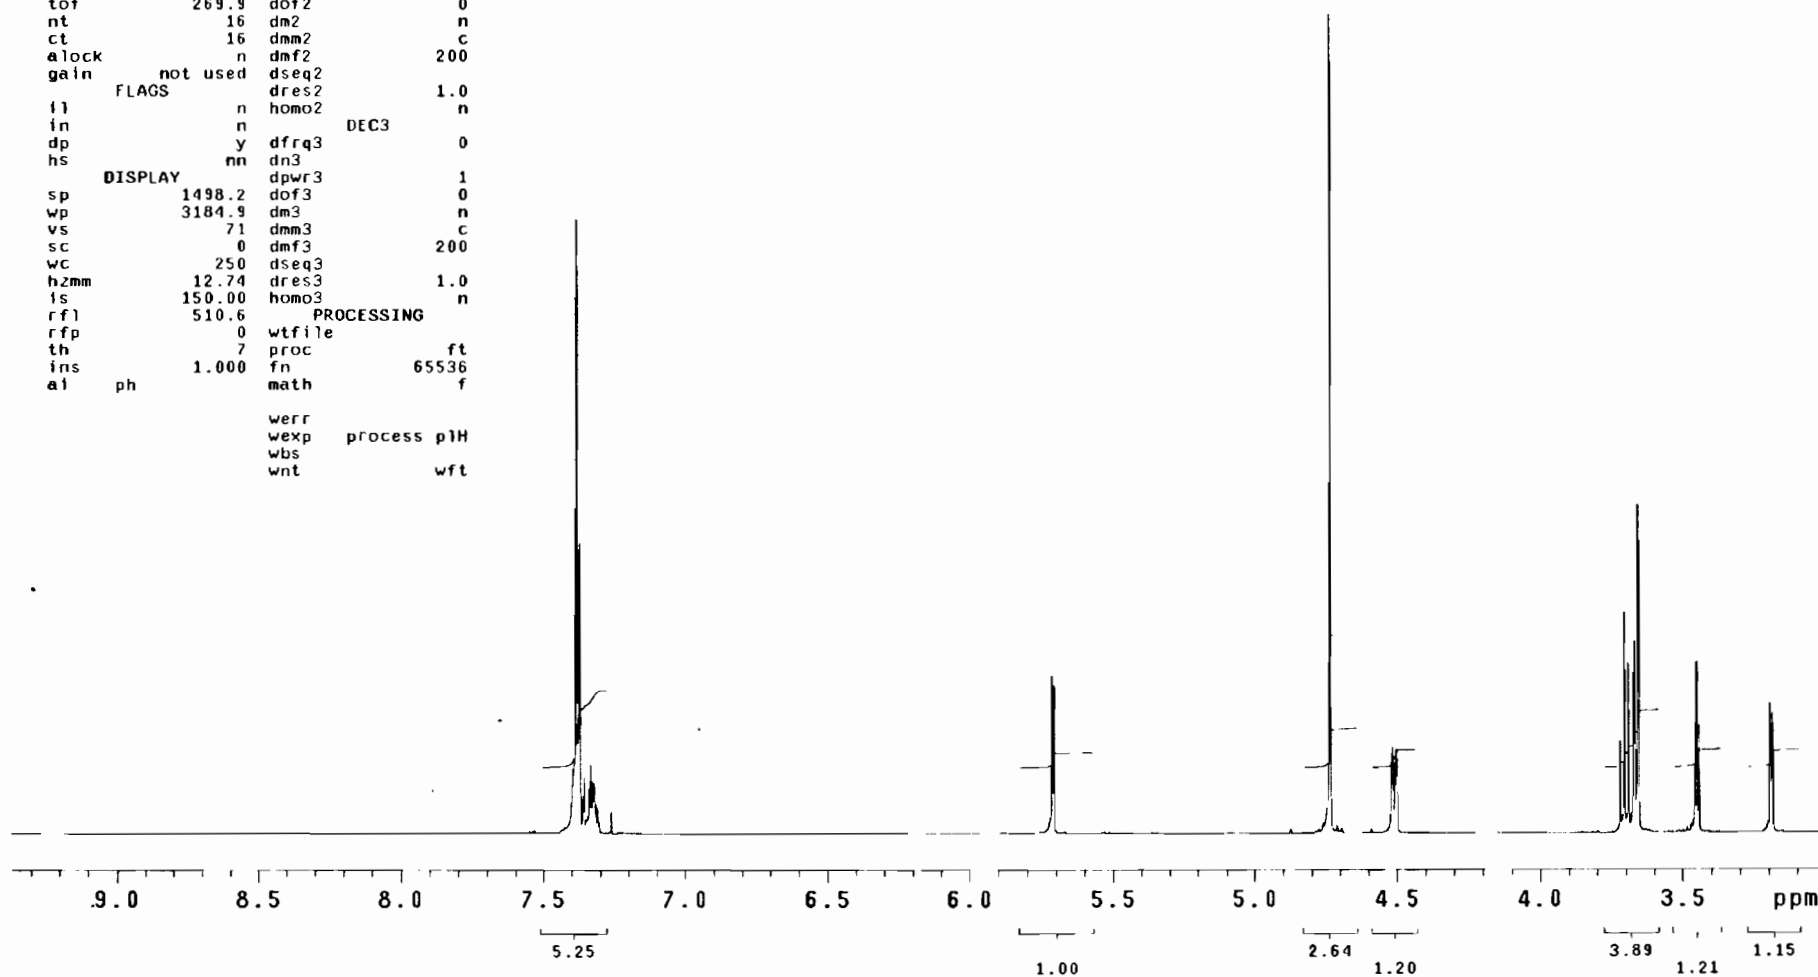

DHL-12

Pulse Sequence: relayh

Solvent: CDCl<sub>3</sub>

Ambient temperature

INOVA-500 "inova5"

Relax. delay 1.300 sec

COSY 90-90

Acq. time 0.221 sec

Width 2317.8 Hz

2D Width 2317.8 Hz

8 repetitions

256 increments

OBSERVE H1, 499.8611751 MHz

DATA PROCESSING

Sine bell 0.110 sec

F1 DATA PROCESSING

Sine bell 0.055 sec

FT size 1024 x 1024

Total time 54 min, 20 sec

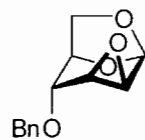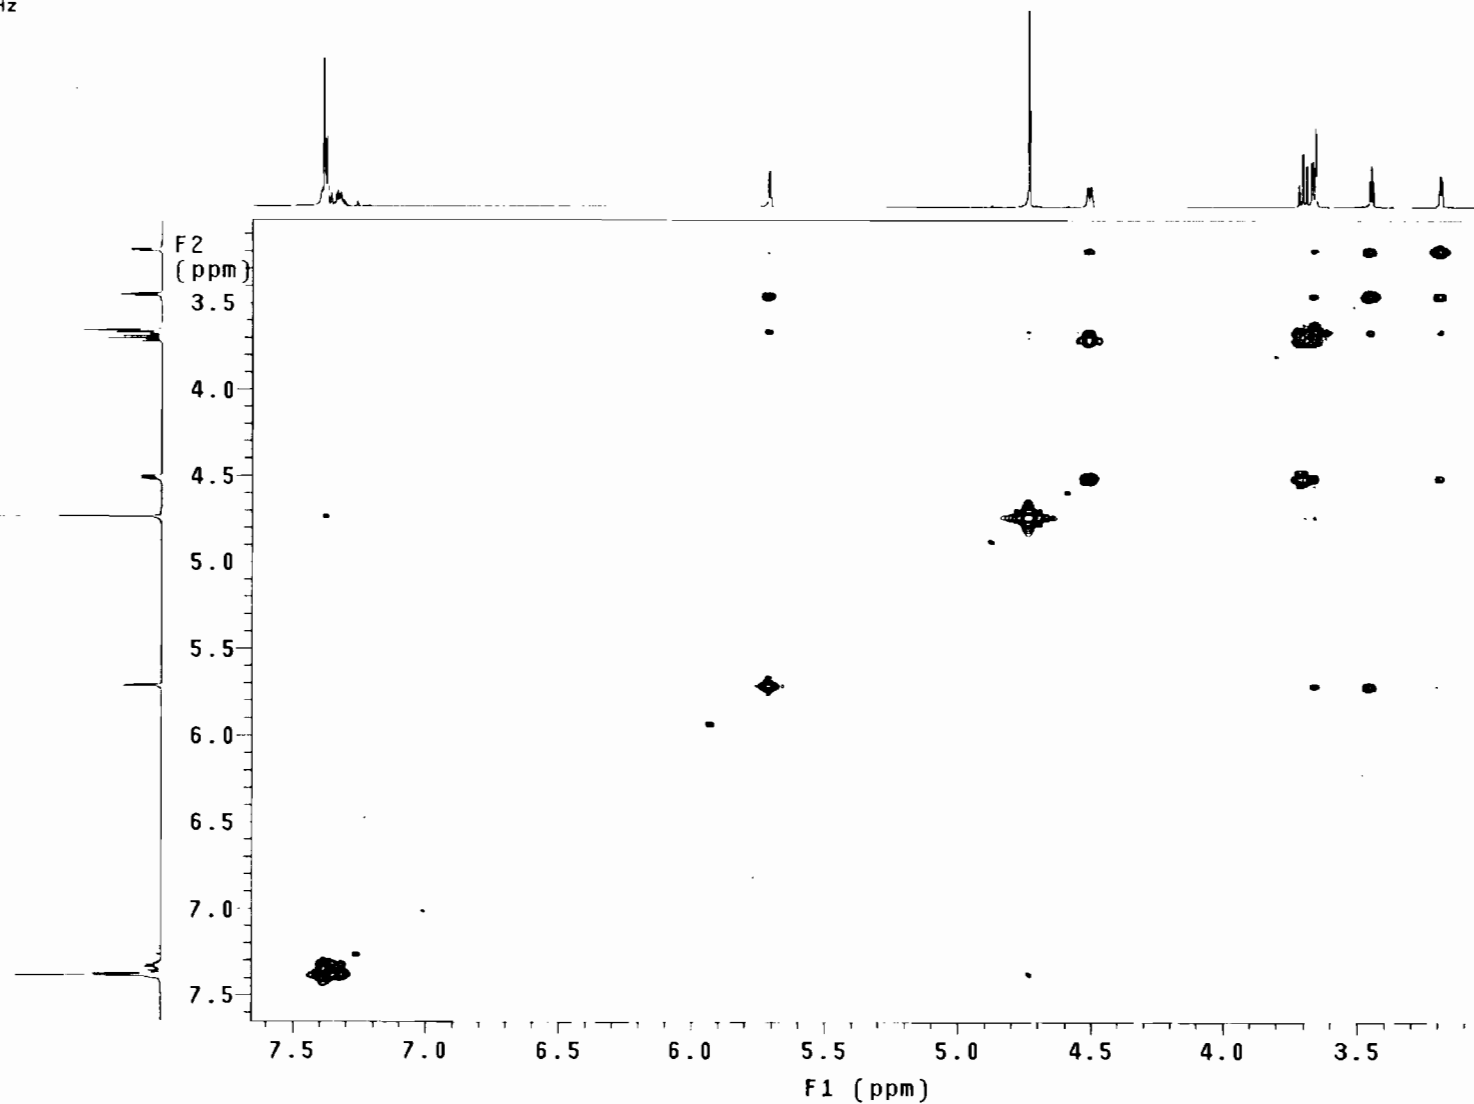

DHL-12

Pulse Sequence: relayh

Solvent: CDCl<sub>3</sub>

Ambient temperature

INOVA-500 "inova5"

Relax. delay 1.300 sec

COZY 90-90

Acq. time 0.221 sec

Width 2317.8 Hz

2D Width 2317.8 Hz

8 repetitions

256 increments

OBSERVE H1, 499.8611751 MHz

DATA PROCESSING

Sine bell 0.110 sec

F1 DATA PROCESSING

Sine bell 0.055 sec

FT size 1024 x 1024

Total time 54 min, 20 sec

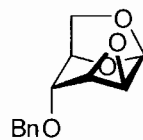

7

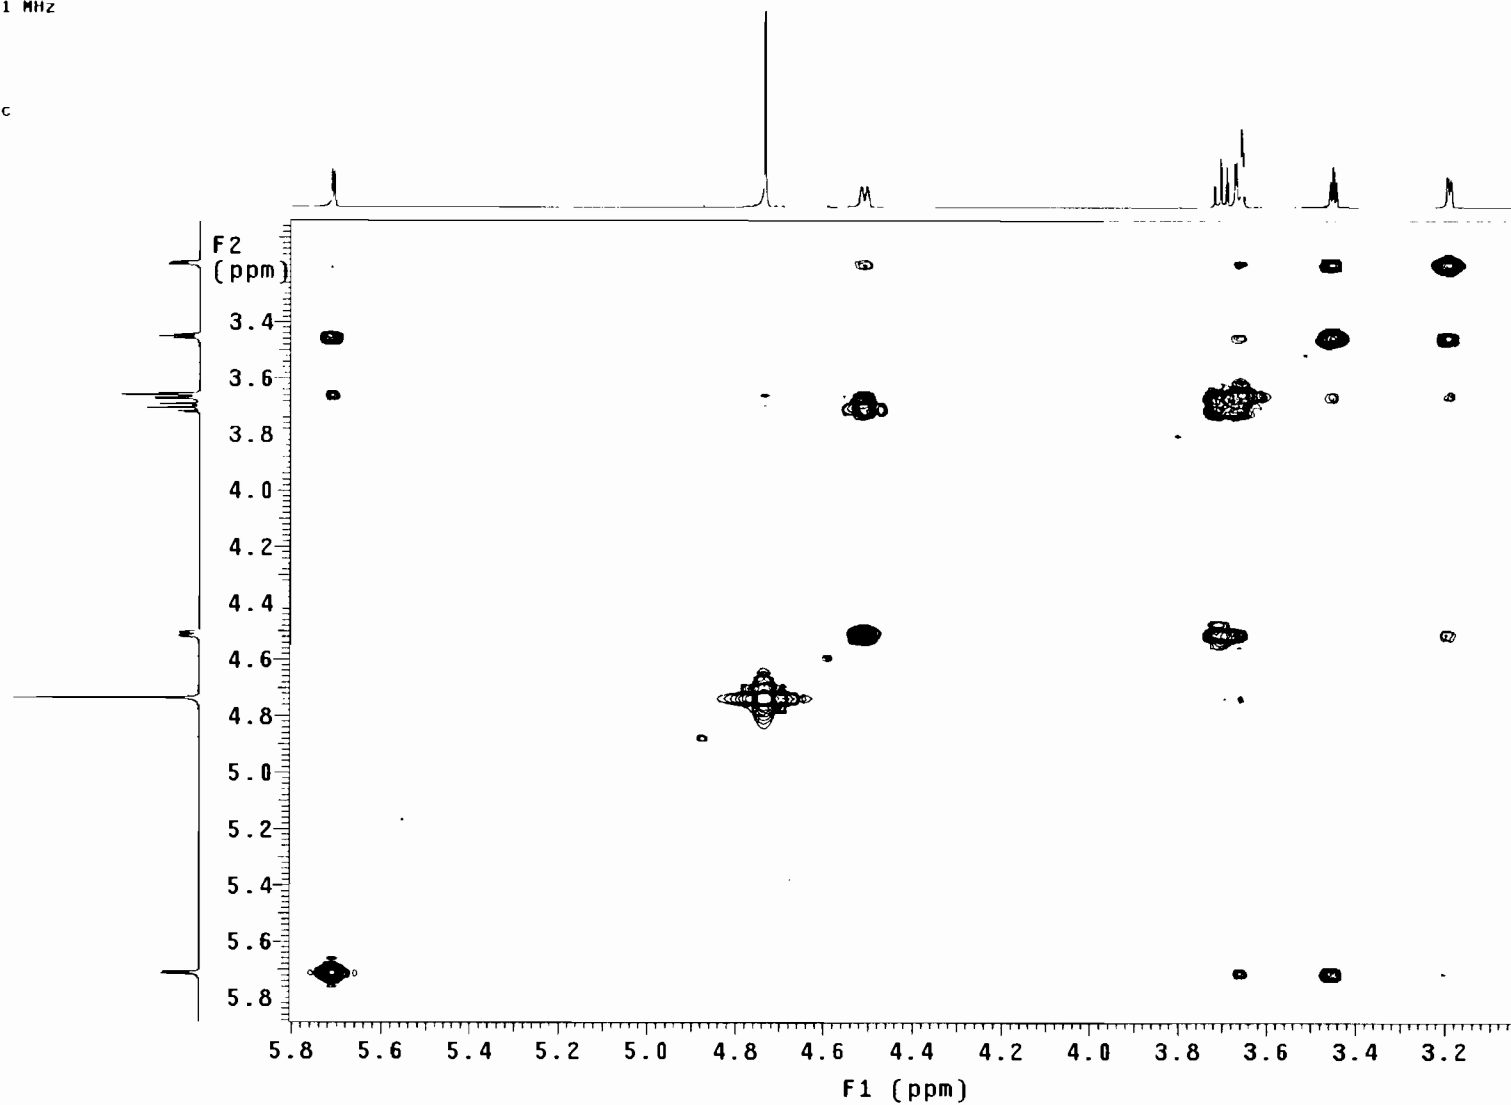

DHL-12

exp2 s2pu1

| SAMPLE      |             | DEC. & VT  |         |
|-------------|-------------|------------|---------|
| date        | Sep 21 2006 | dfrq       | 499.864 |
| solvent     | CDCl3       | dn         | H1      |
| file        | exp         | dpwr       | 40      |
| ACQUISITION |             | dof        | 0       |
| sfrq        | 125.702     | dm         | yyy     |
| tn          | C13         | dmm        | w       |
| at          | 1.215       | dmf        | 8787.35 |
| np          | 65536       | dseq       |         |
| sw          | 26963.3     | dres       | 1.0     |
| fb          | 15000       | homo       | n       |
| bs          | 4           | DEC2       |         |
| tpwr        | 52          | dfrq2      | 0       |
| pw          | 10.2        | dn2        |         |
| d1          | 1.800       | dpwr2      | 1       |
| tof         | 144.5       | dof2       | 0       |
| nt          | 1200        | dm2        | n       |
| ct          | 115         | dmm2       | c       |
| alock       | n           | dmf2       | 10000   |
| gain        | not used    | dseq2      |         |
| FLAGS       |             | dres2      | 1.0     |
| il          | n           | homo2      | n       |
| in          | n           | DEC3       |         |
| dp          | y           | dfrq3      | 0       |
| hs          | nn          | dn3        |         |
| DISPLAY     |             | dpwr3      | 1       |
| sp          | 5682.4      | dof3       | 0       |
| wp          | 14845.5     | dm3        | n       |
| vs          | 72          | dmm3       | c       |
| sc          | 0           | dmf3       | 10000   |
| wc          | 250         | dseq3      |         |
| hzmm        | 59.38       | dres3      | 1.0     |
| ls          | 500.00      | homo3      | n       |
| rfl         | 11117.2     | PROCESSING |         |
| rfp         | 9678.1      | lb         | 1.00    |
| th          | 4           | wtfile     |         |
| ins         | 100.000     | proc       | ft      |
| ai          | cdc ph      | fn         | 131072  |
|             |             | math       | f       |

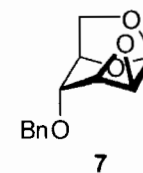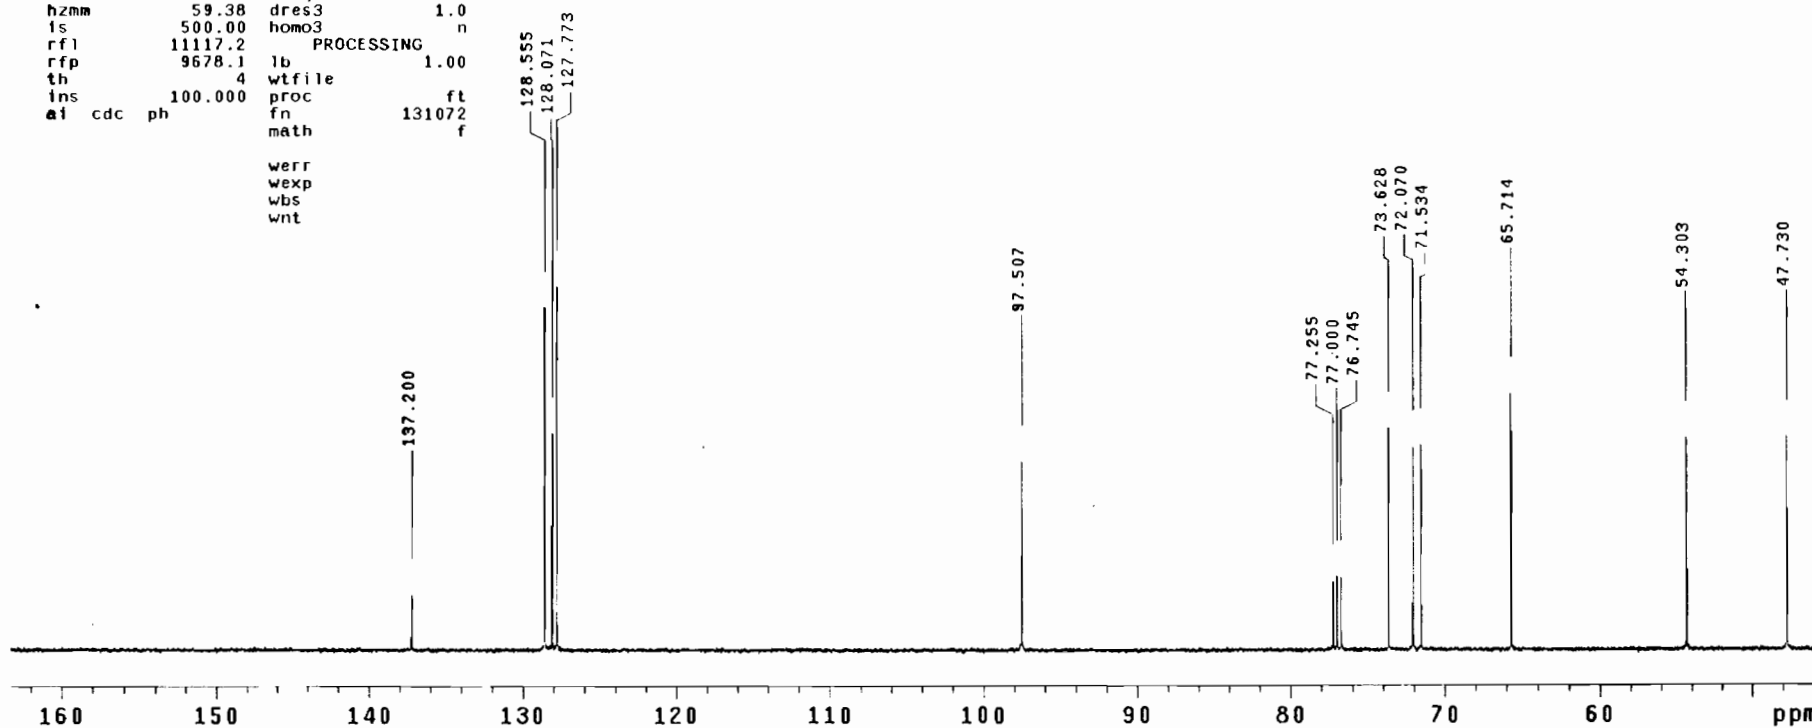

DHL-12

Pulse Sequence: dept

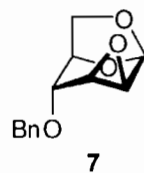

CH3 carbons

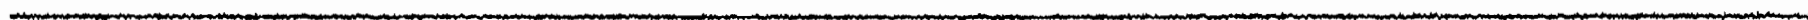

CH2 carbons

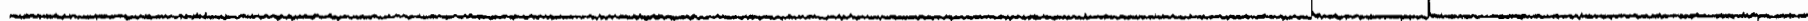

CH carbons

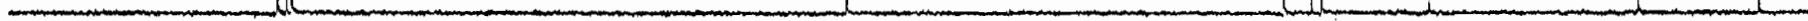

all protonated carbons

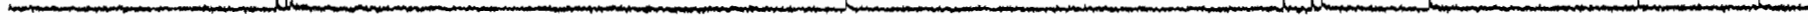

140 130 120 110 100 90 80 70 60 50 ppm

DHL-12

Pulse Sequence: hetcor

Solvent: CDCl<sub>3</sub>

Ambient temperature

User: 1-14-87

INOVA-500 "inova5"

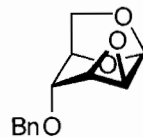

Relax. delay 1.500 sec

Acq. time 0.111 sec

Width 18403.5 Hz

2D Width 2352.2 Hz

4 repetitions

256 increments

OBSERVE C13, 125.6902031 MHz

DECOUPLE H1, 499.8638237 MHz

Power 40 dB

on during acquisition

off during delay

WALTZ-16 modulated

DATA PROCESSING

Line broadening 1.0 Hz

F1 DATA PROCESSING

Line broadening 0.3 Hz

FT size 4096 x 512

Total time 28 min, 56 sec

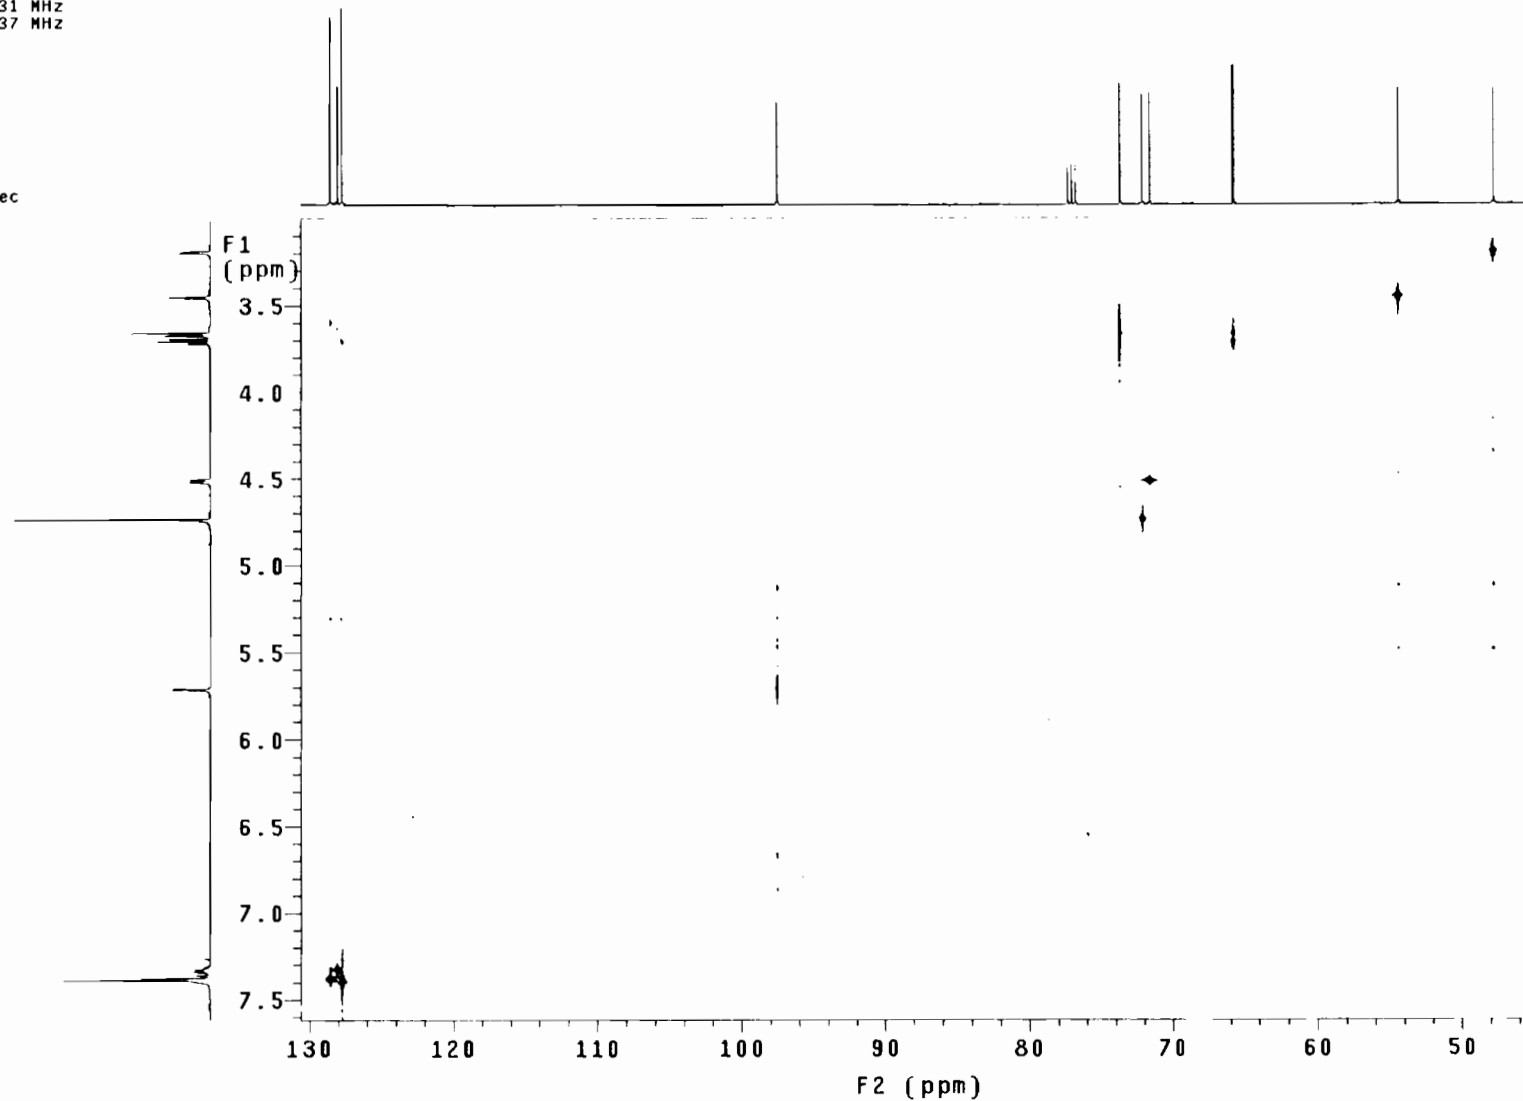

DHL-12

Pulse Sequence: hetcor

Solvent: CDCl<sub>3</sub>

Ambient temperature

User: 1-14-87

INOVA-500 "inova5"

Relax. delay 1.500 sec

Acq. time 0.111 sec

Width 18403.5 Hz

2D Width 2352.2 Hz

4 repetitions

256 increments

OBSERVE C13, 125.6902031 MHz

DECOUPLE H1, 499.8638237 MHz

Power 40 dB

on during acquisition

off during delay

WALTZ-16 modulated

DATA PROCESSING

Line broadening 1.0 Hz

F1 DATA PROCESSING

Line broadening 0.3 Hz

FT size 4096 x 512

Total time 28 min, 56 sec

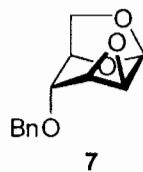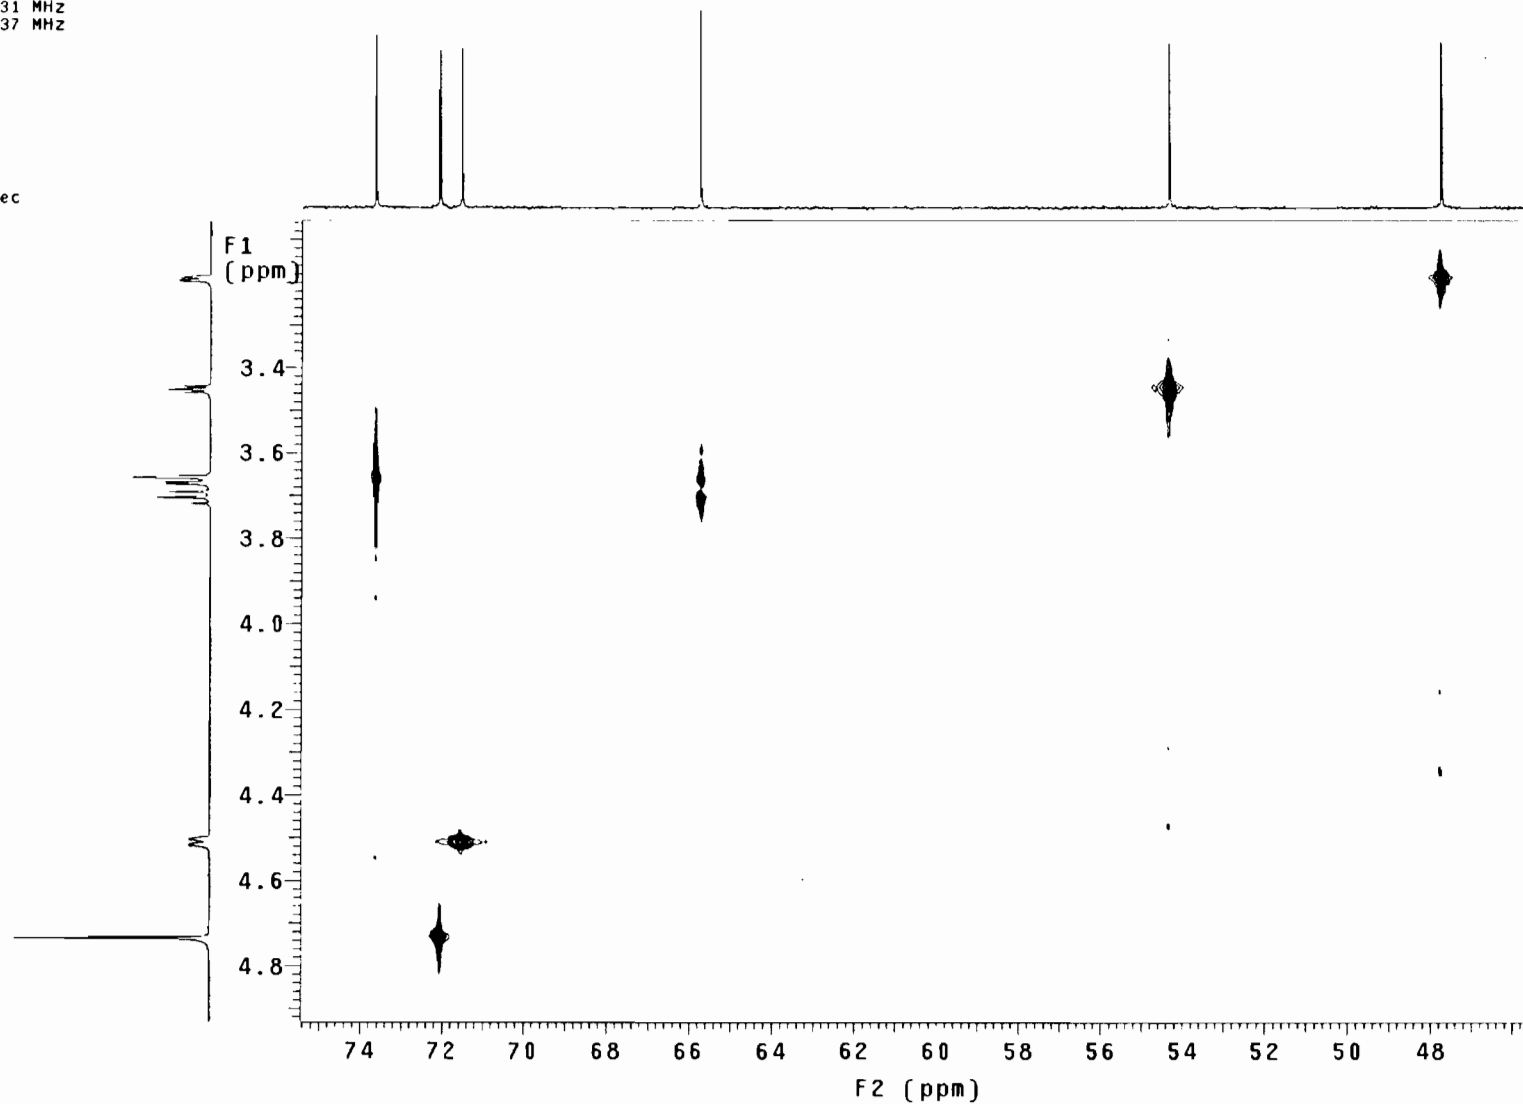

DHL-10

exp1 s2pu1

|             |            |            |            |
|-------------|------------|------------|------------|
| SAMPLE      |            | DEC. & VT  |            |
| date        | Sep 2 2006 | dfrq       | 499.864    |
| solvent     | CDC13      | dn         | H1         |
| file        | exp        | dpwr       | 30         |
| ACQUISITION |            | dof        | 0          |
| sfrq        | 499.864    | dm         | nnn        |
| tn          | H1         | dmm        | C          |
| at          | 5.016      | dmf        | 200        |
| np          | 65536      | dseq       |            |
| sw          | 6533.3     | dres       | 1.0        |
| fb          | 4000       | homo       | n          |
| bs          | 4          | DEC2       |            |
| tpwr        | 61         | dfrq2      | 0          |
| pw          | 13.5       | dn2        |            |
| d1          | 0.100      | dpwr2      | 1          |
| tof         | 269.9      | dof2       | 0          |
| nt          | 16         | dm2        | n          |
| ct          | 16         | dmm2       | C          |
| alock       | n          | dmf2       | 200        |
| gain        | not used   | dseq2      |            |
| FLAGS       |            | dres2      | 1.0        |
| il          | n          | homo2      | n          |
| in          | n          | DEC3       |            |
| dp          | y          | dfrq3      | 0          |
| hs          | nn         | dn3        |            |
| DISPLAY     |            | dpwr3      | 1          |
| sp          | 828.7      | dof3       | 0          |
| wp          | 3640.1     | dm3        | n          |
| vs          | 56         | dmm3       | C          |
| sc          | 0          | dmf3       | 200        |
| wc          | 250        | dseq3      |            |
| hzmm        | 14.56      | dres3      | 1.0        |
| is          | 112.50     | homo3      | n          |
| rfl         | 510.6      | PROCESSING |            |
| rfp         | 0          | wtfile     |            |
| th          | 7          | proc       | ft         |
| ins         | 1.000      | fn         | 65536      |
| ai          | ph         | math       | f          |
|             |            | werr       |            |
|             |            | wexp       | process pH |
|             |            | wbs        |            |
|             |            | wnt        | wft        |

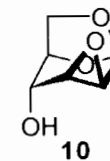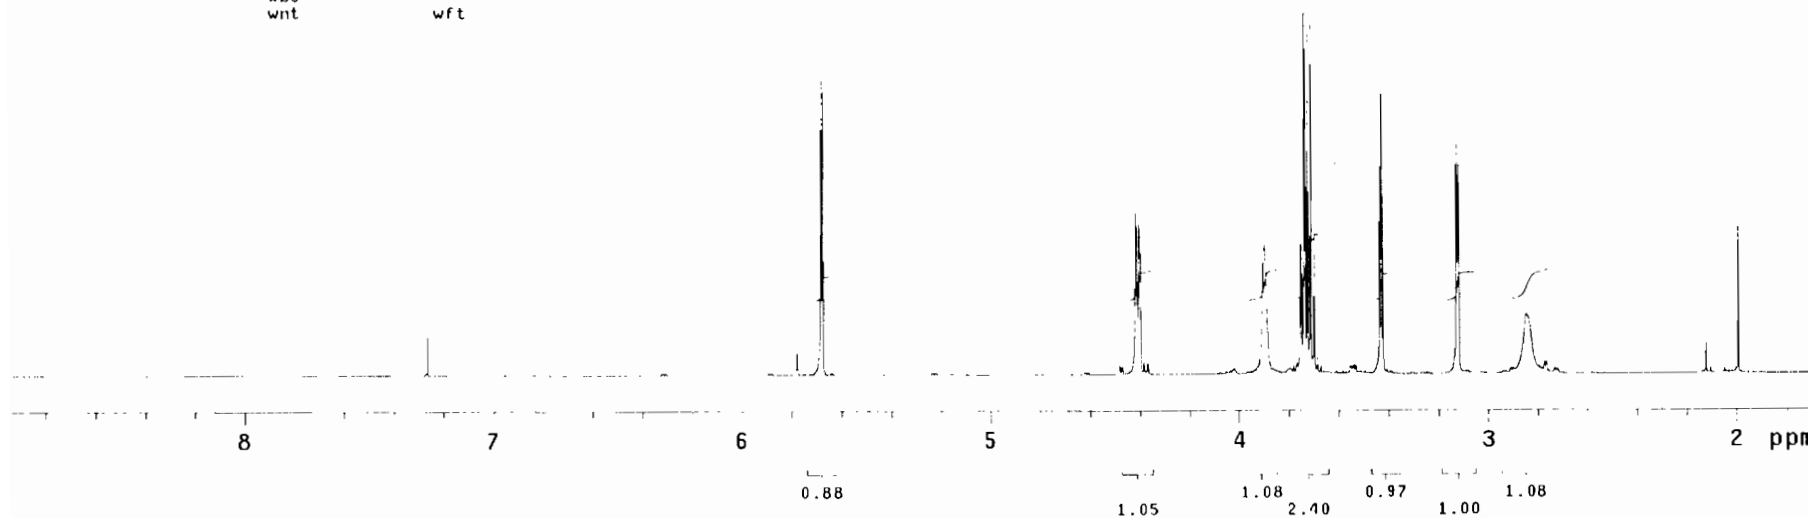

DHL-10

Pulse Sequence: relayh

Solvent: CDC13

Ambient temperature

INOVA-500 "inova5"

Relax. delay 1.300 sec  
COSY 90-90

Acq. time 0.153 sec

Width 1669.2 Hz

2D Width 1669.2 Hz

4 repetitions

256 increments

OBSERVE H1, 499.8611751 MHz

DATA PROCESSING

Sine bell 0.077 sec

F1 DATA PROCESSING

Sine bell 0.038 sec

FT size 512 x 512

Total time 26 min, 28 sec

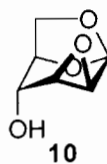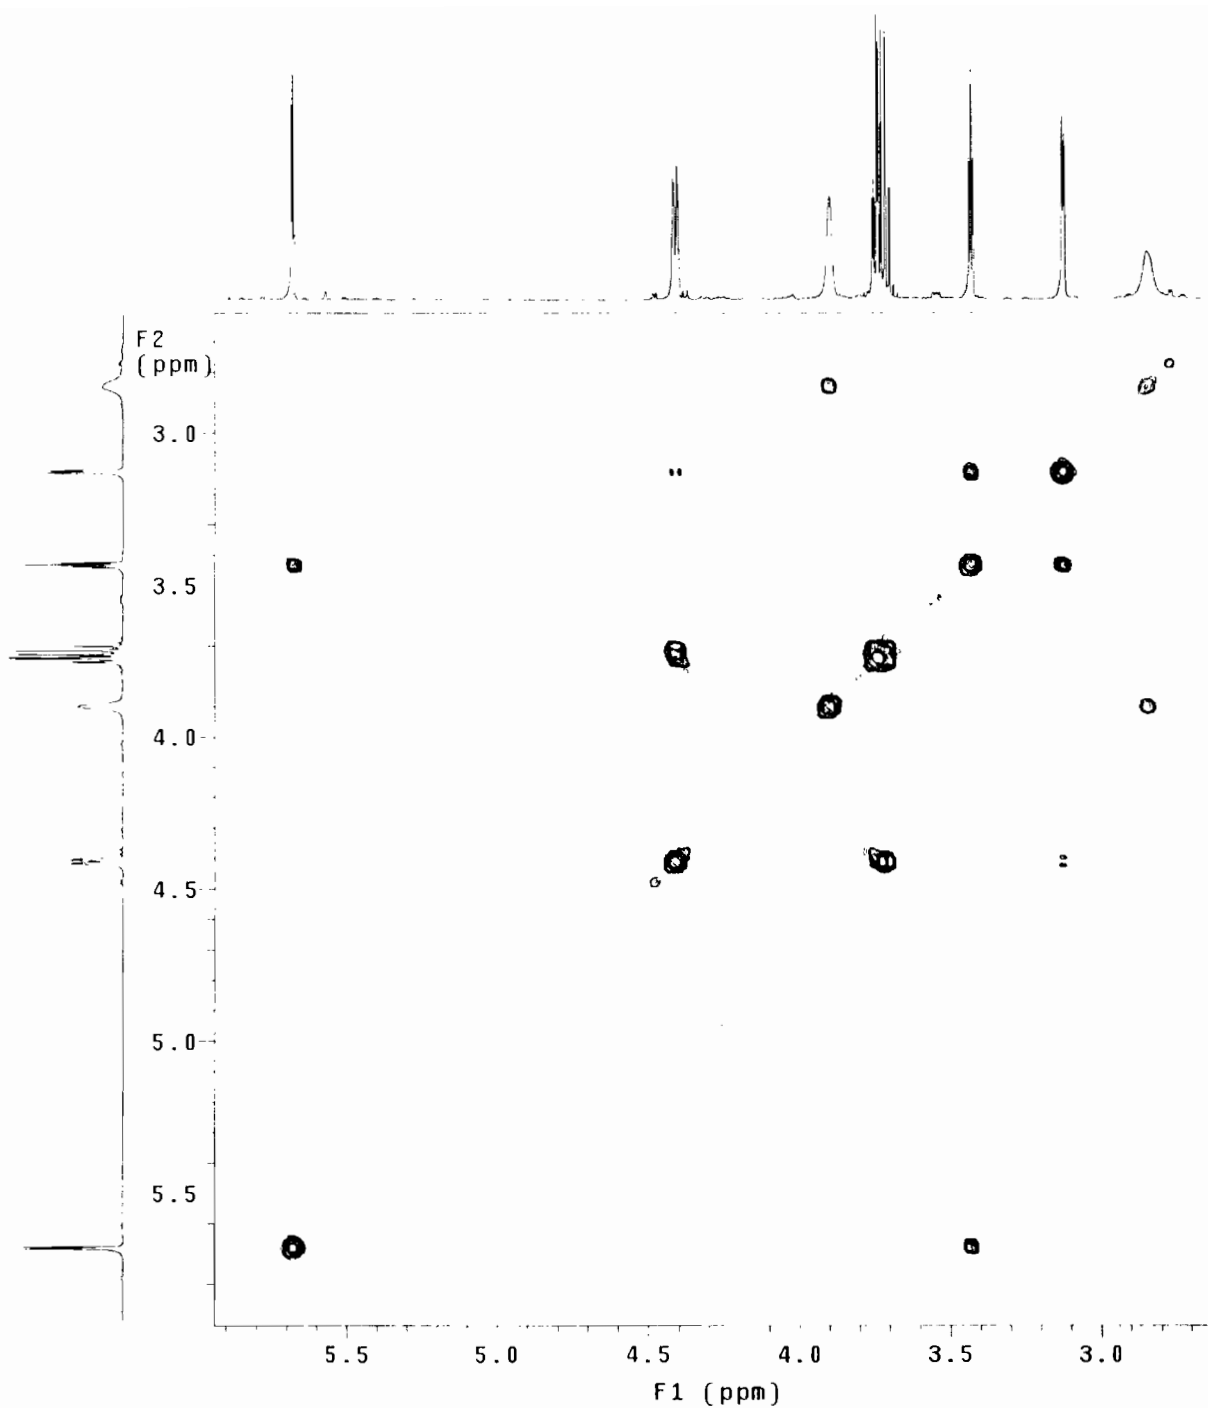

DHL-10

exp2 s2pul

| SAMPLE      |            | DEC. & VT  |         |
|-------------|------------|------------|---------|
| date        | Sep 2 2006 | dfrq       | 499.864 |
| solvent     | CDC13      | dn         | H1      |
| file        | exp        | dpwr       | 40      |
| ACQUISITION |            | dof        | 0       |
| sfrq        | 125.702    | dm         | yyy     |
| tn          | C13        | dmm        | w       |
| at          | 1.215      | dmf        | 6787.35 |
| np          | 65536      | dseq       |         |
| sw          | 26963.3    | dres       | 1.0     |
| fb          | 15000      | homo       | n       |
| bs          | 4          | DEC2       |         |
| tpwr        | 52         | dfrq2      | 0       |
| pw          | 10.2       | dn2        |         |
| d1          | 1.800      | dpwr2      | 1       |
| tof         | 144.5      | dof2       | 0       |
| nt          | 1200       | dm2        | n       |
| ct          | 106        | dmm2       | c       |
| alock       | n          | dmf2       | 10000   |
| gain        | not used   | dseq2      |         |
| FLAGS       |            | dres2      | 1.0     |
| il          | n          | homo2      | n       |
| in          | n          | DEC3       |         |
| dp          | y          | dfrq3      | 0       |
| hs          | nn         | dn3        |         |
| DISPLAY     |            | dpwr3      | 1       |
| sp          | 1593.2     | dof3       | 0       |
| wp          | 16808.8    | dm3        | n       |
| vs          | 61         | dmm3       | c       |
| sc          | 0          | dmf3       | 10000   |
| wc          | 250        | dseq3      |         |
| hzmm        | 67.24      | dres3      | 1.0     |
| is          | 500.00     | homo3      | n       |
| rfl         | 11116.8    | PROCESSING |         |
| rfp         | 9678.1     | lb         | 1.00    |
| th          | 8          | wtfile     |         |
| ins         | 100.000    | proc       | ft      |
| ai          | cdc ph     | fn         | 131072  |
|             |            | math       | f       |

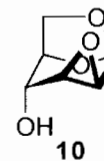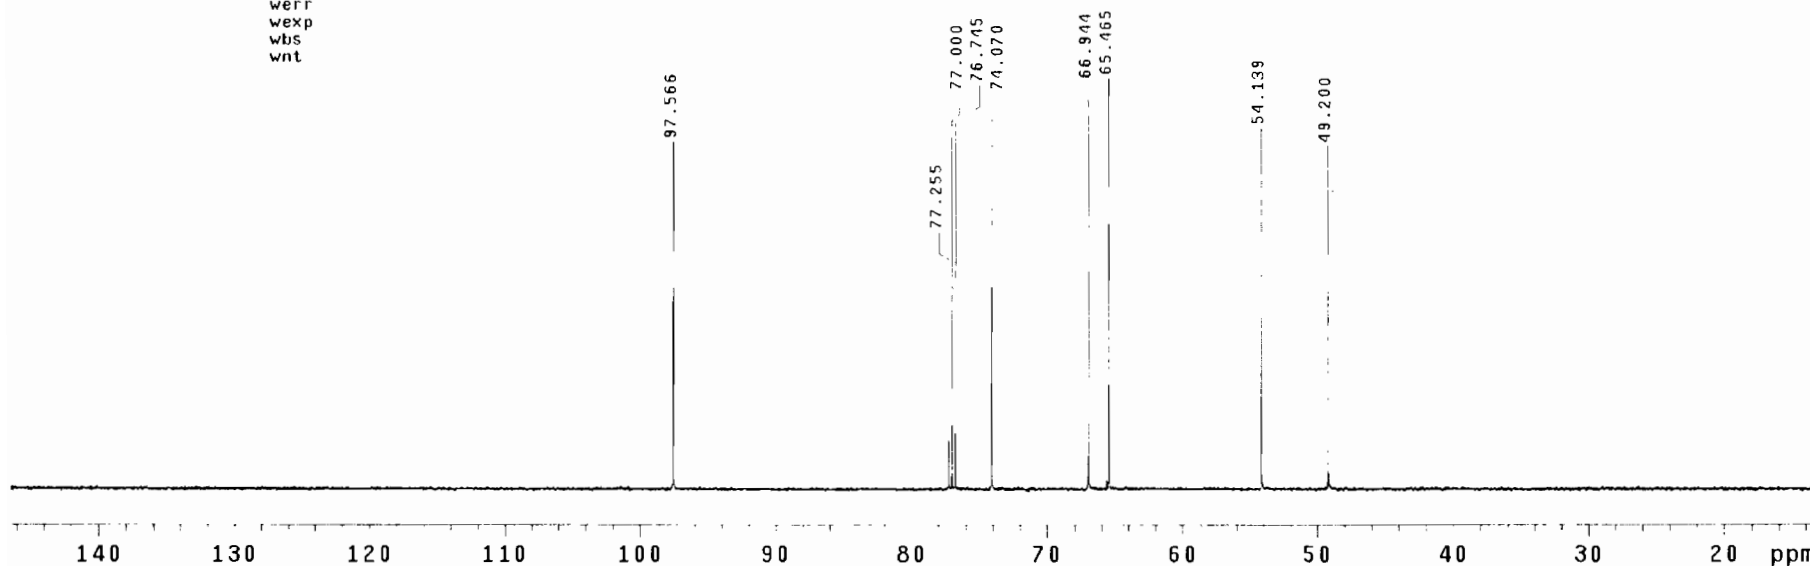

DHL-10

Pulse Sequence: dept

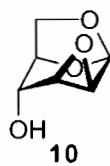

CH3 carbons

CH2 carbons

CH carbons

all protonated carbons

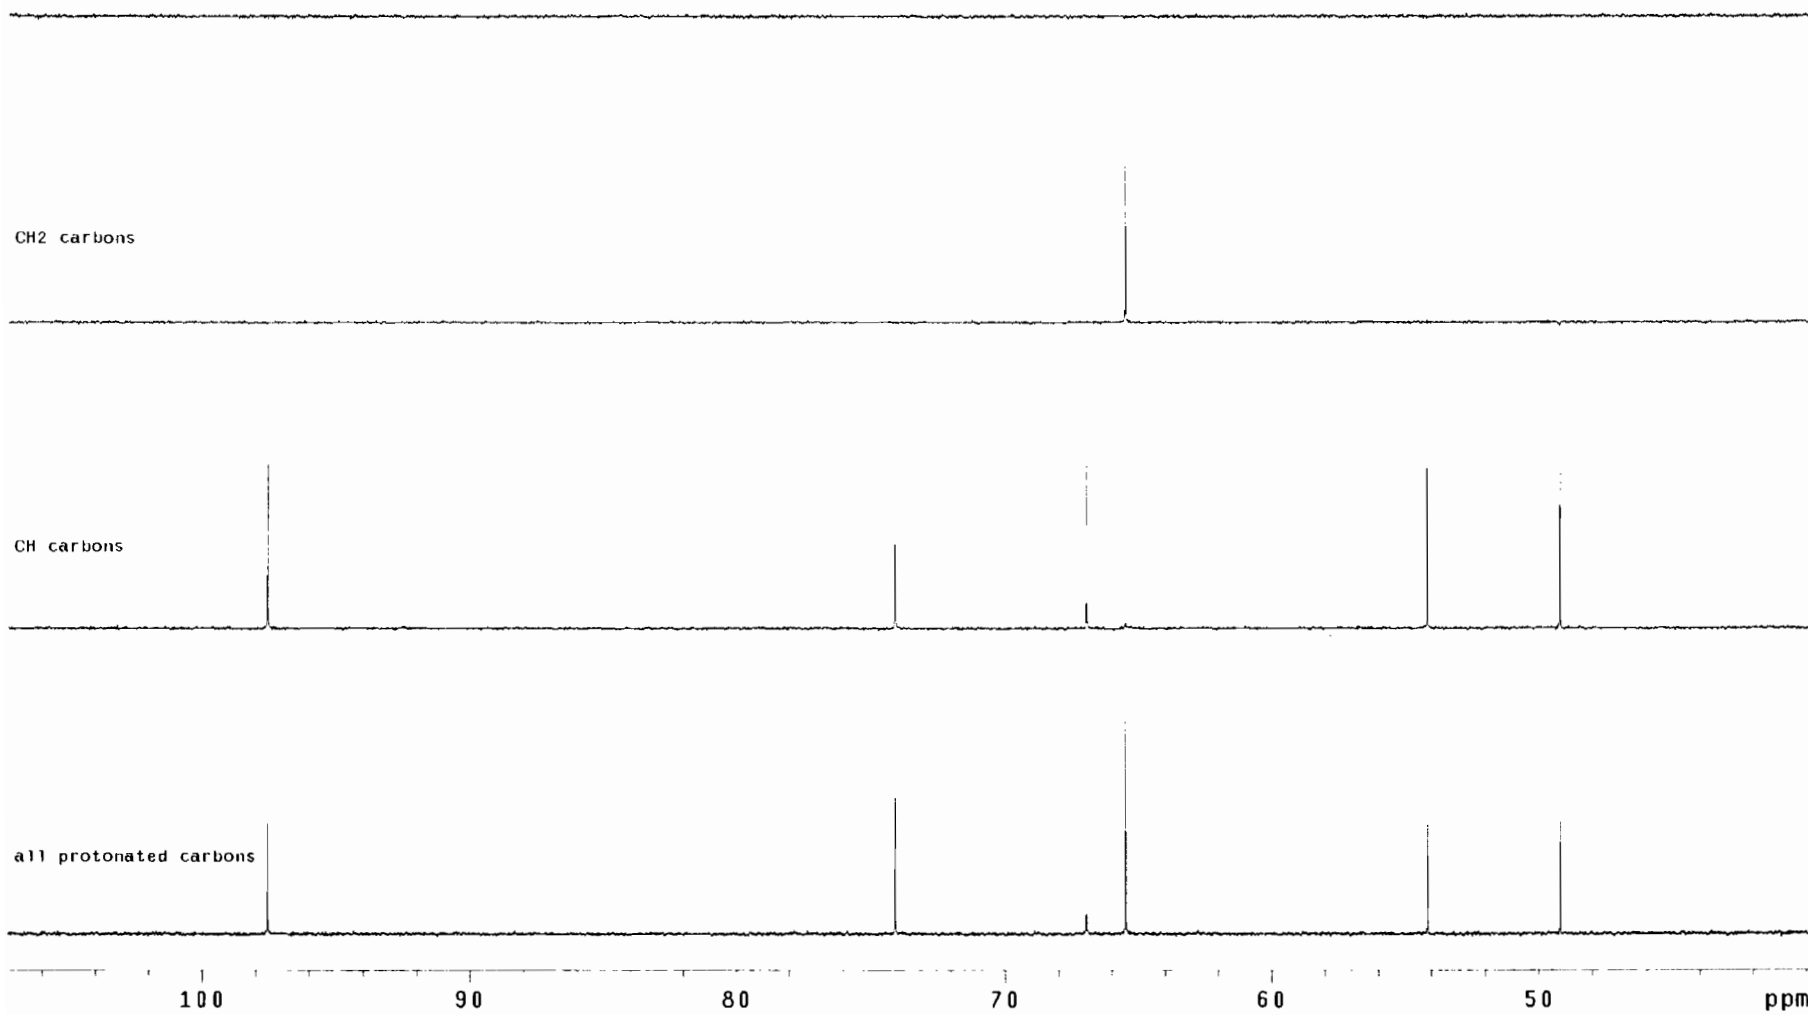

DHL-10

Pulse Sequence: hetcor

Solvent: CDCl<sub>3</sub>

Ambient temperature

User: 1-14-87

INOVA-500 "inova5"

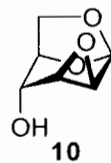

Relax. delay 1.500 sec

Acq. time 0.111 sec

Width 18403.5 Hz

2D Width 1631.1 Hz

4 repetitions

256 increments

OBSERVE C13, 125.6902027 MHz

DECOUPLE H1, 499.8633086 MHz

Power 40 dB

on during acquisition

off during delay

WALTZ-16 modulated

DATA PROCESSING

Line broadening 1.0 Hz

F1 DATA PROCESSING

Line broadening 0.3 Hz

FT size 4096 x 256

Total time 29 min, 21 sec

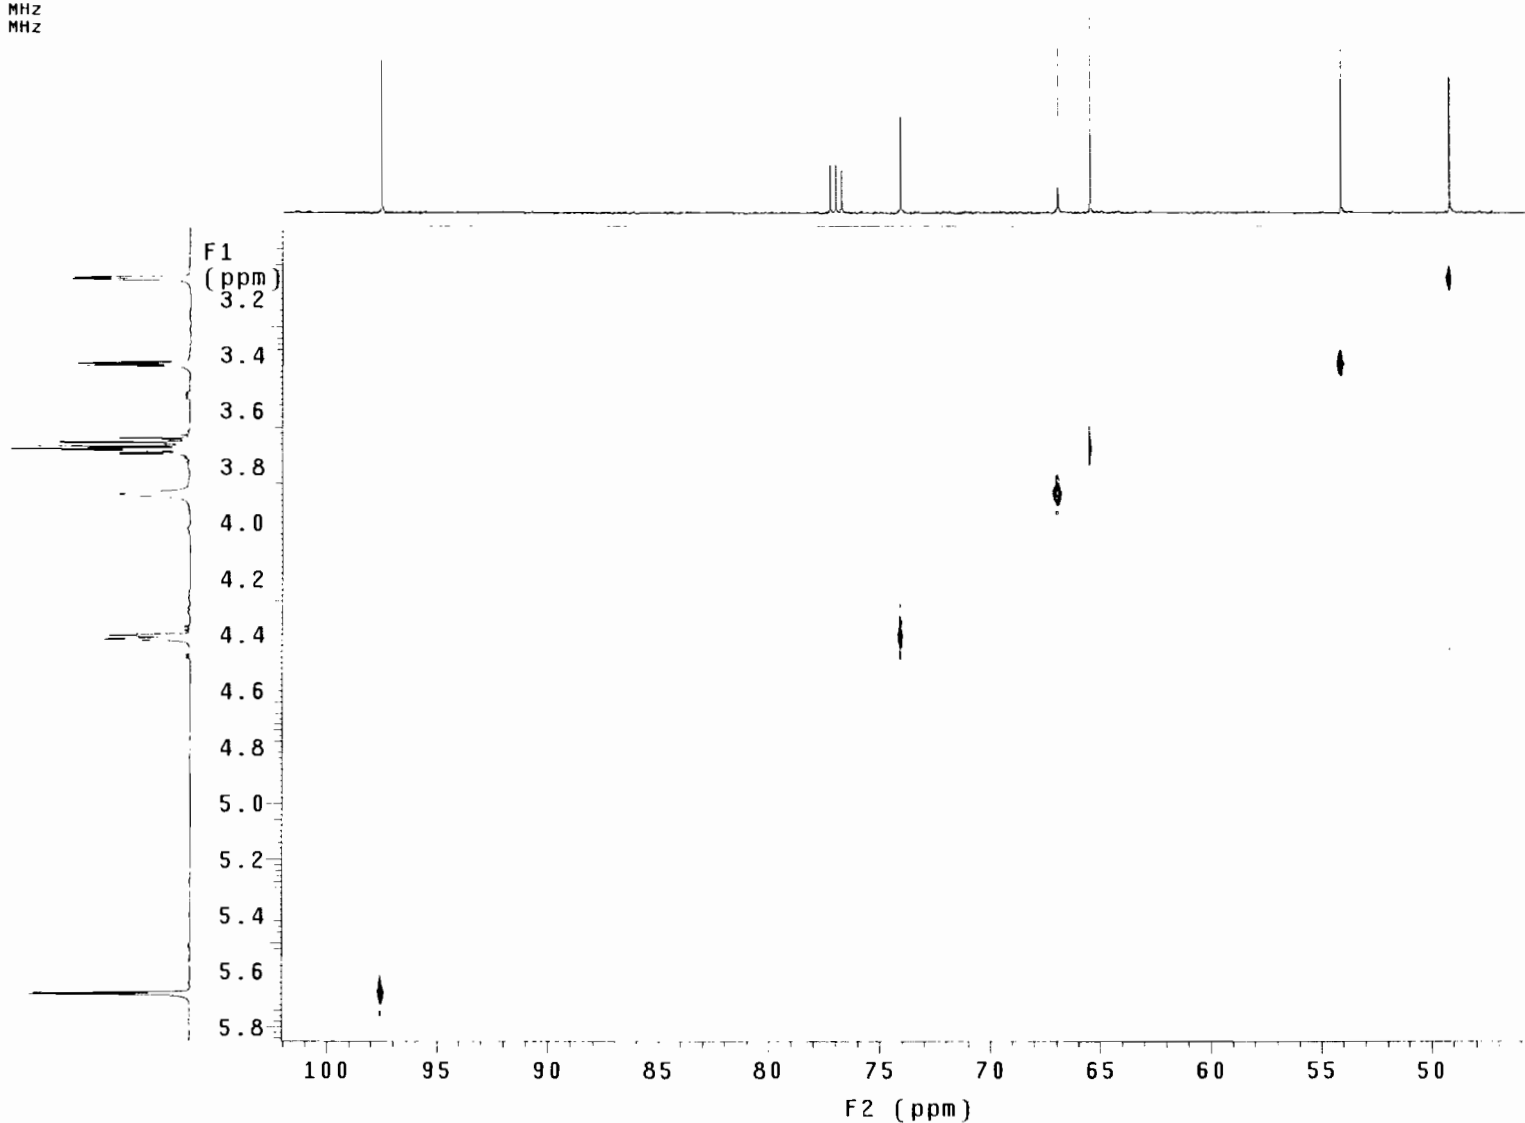

DHL-11

exp1 s2pu1

| SAMPLE      |             | DEC. & VT |            |
|-------------|-------------|-----------|------------|
| date        | Sep 21 2006 | dfrq      | 499.864    |
| solvent     | CDC13       | dn        | H1         |
| file        | exp         | dpwr      | 30         |
| ACQUISITION |             |           |            |
| sfrq        | 499.864     | dm        | nnn        |
| tn          | H1          | dmm       | c          |
| at          | 5.016       | dmd       | 200        |
| np          | 65536       | dseq      |            |
| sw          | 6533.3      | dres      | 1.0        |
| fb          | 4000        | homo      | n          |
| bs          | 4           |           |            |
| tpwr        | 61          | dfrq2     | 0          |
| pw          | 13.5        | dn2       |            |
| d1          | 0.100       | dpwr2     | 1          |
| tof         | 269.9       | dof2      | 0          |
| nt          | 16          | dm2       | n          |
| ct          | 16          | dmm2      | c          |
| clock       | n           | dmd2      | 200        |
| gain        | not used    | dseq2     |            |
|             |             | dres2     | 1.0        |
| fl          | n           | homo2     | n          |
| ln          | n           |           |            |
| dp          | y           | dfrq3     | 0          |
| hs          | nn          | dn3       |            |
| DISPLAY     |             |           |            |
| sp          | 1403.9      | dpwr3     | 1          |
| wp          | 3562.7      | dof3      | 0          |
| vs          | 58          | dm3       | n          |
| sc          | 0           | dmd3      | c          |
| wc          | 250         | dmd3      | 200        |
| hzmm        | 14.25       | dseq3     |            |
| is          | 100.00      | dres3     | 1.0        |
| rfl         | 510.6       | homo3     | n          |
| PROCESSING  |             |           |            |
| rfp         | 0           | wtfile    | ft         |
| th          | 7           | proc      | fn         |
| ins         | 1.000       | fn        | 65536      |
| ai          | ph          | math      | f          |
|             |             | werr      |            |
|             |             | wexp      | process pH |
|             |             | wbs       |            |
|             |             | wnt       | wft        |

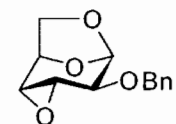

11

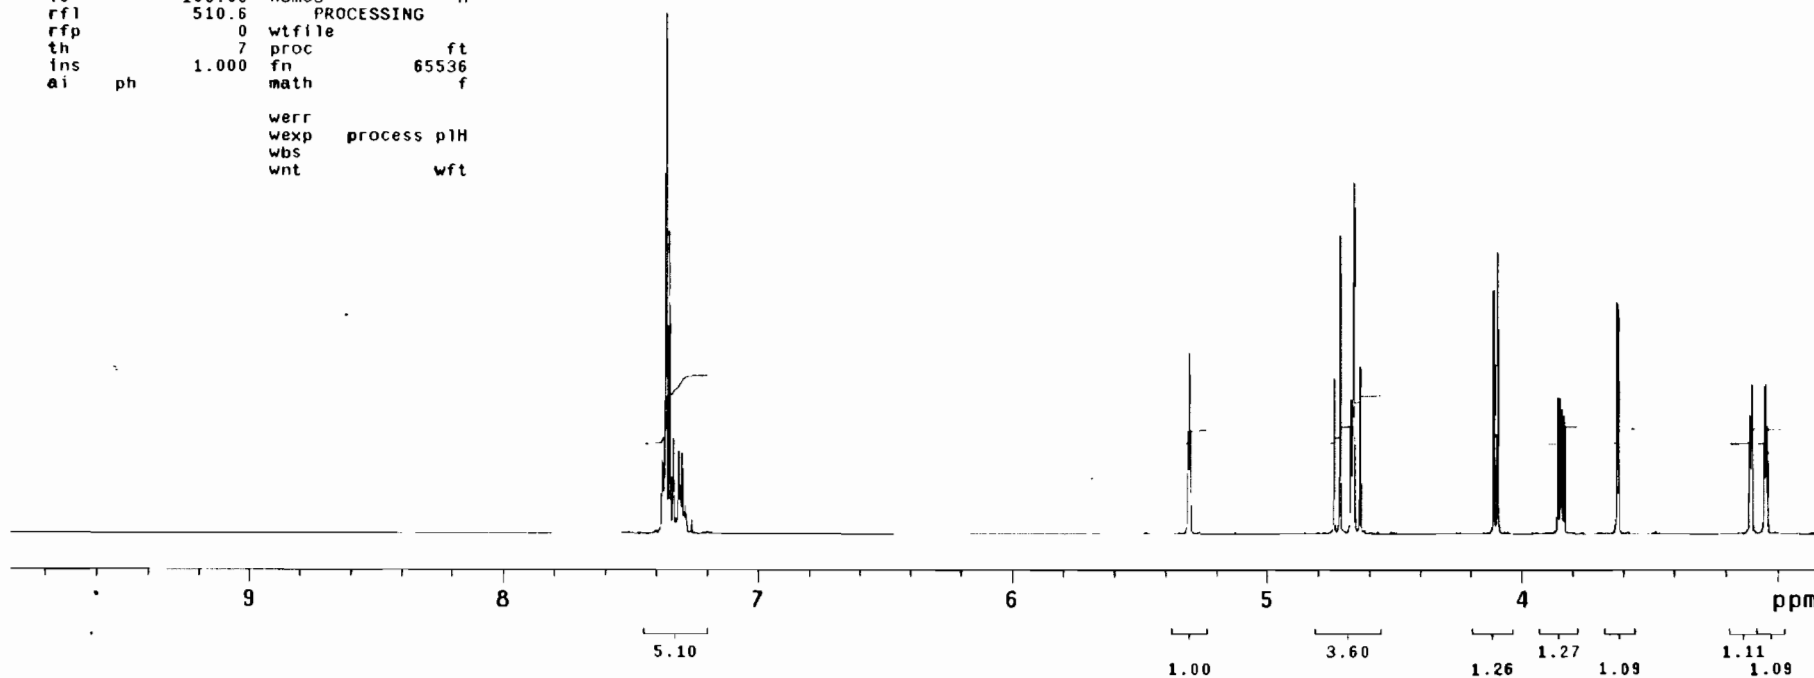

DHL-11

Pulse Sequence: relayh

Solvent: CDCl<sub>3</sub>

Ambient temperature

INOVA-500 "inova5"

Relax. delay 1.300 sec

COSY 90-90

Acq. time 0.218 sec

Width 2352.1 Hz

2D Width 2352.1 Hz

4 repetitions

256 increments

OBSERVE H1, 499.8611751 MHz

DATA PROCESSING

Sine bell 0.109 sec

F1 DATA PROCESSING

Sine bell 0.054 sec

FT size 1024 x 1024

Total time 27 min, 12 sec

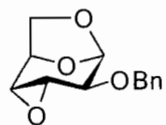

11

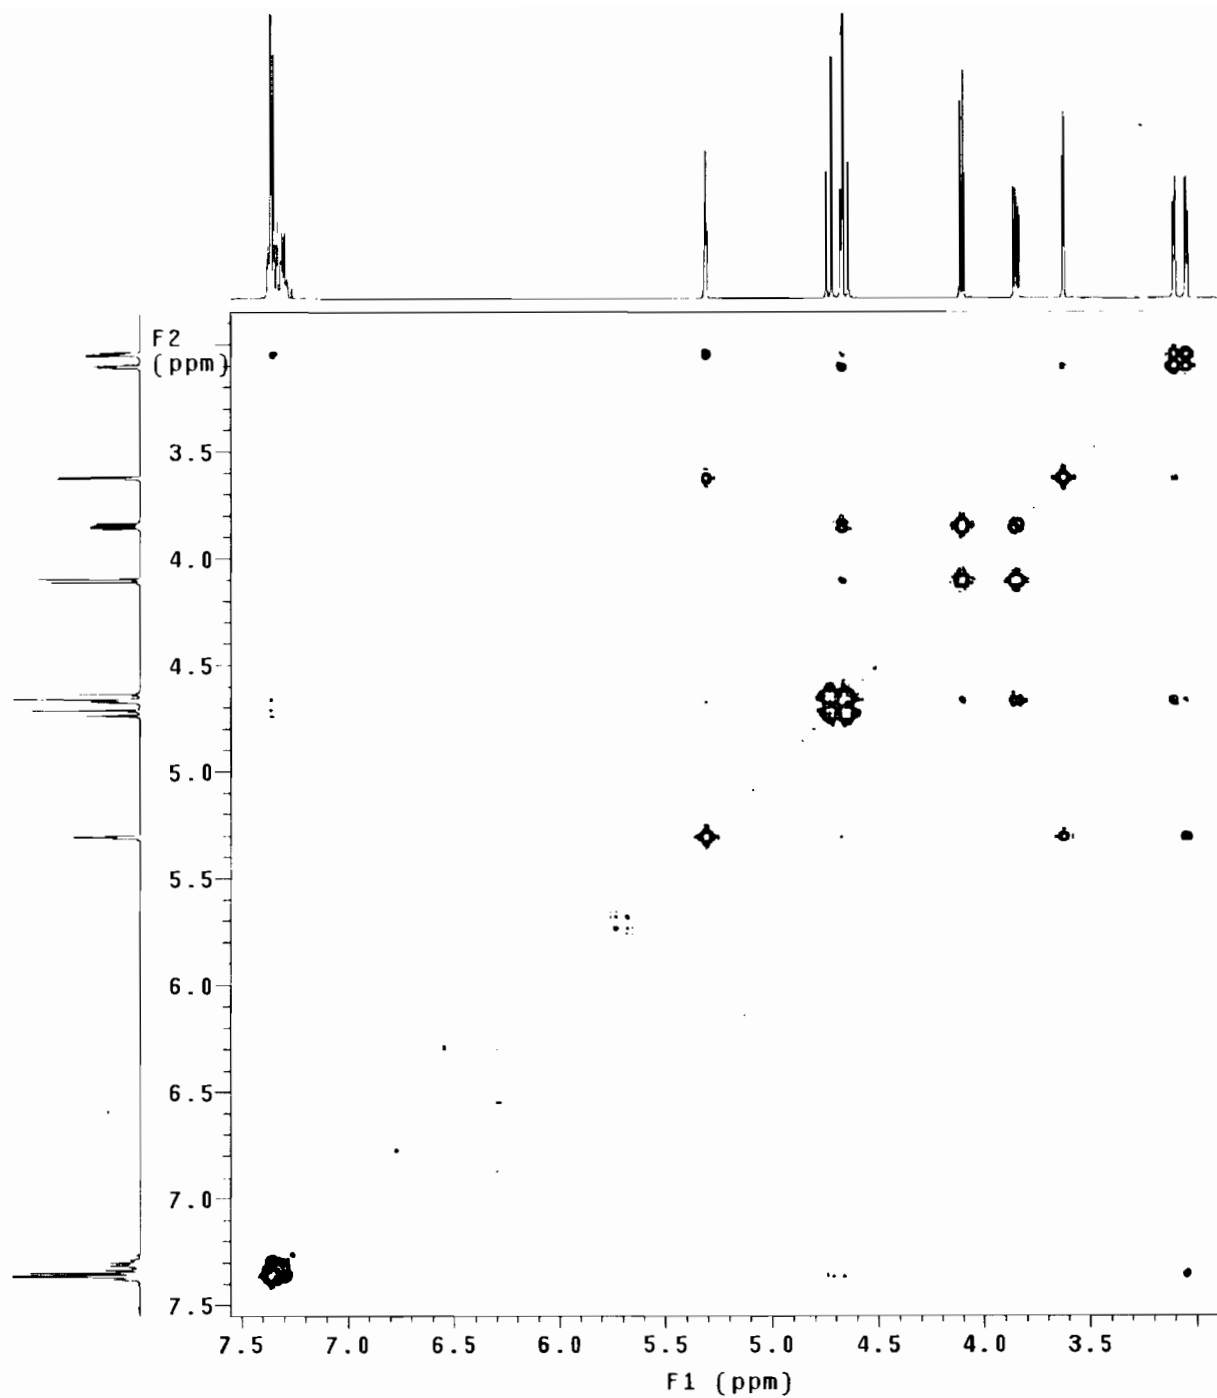

OHL-11

Pulse Sequence: relayh

Solvent: CDCl<sub>3</sub>  
Ambient temperature  
INOVA-500 "inova5"

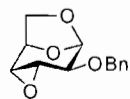

11

Relax. delay 1.300 sec  
COSY 90-90  
Acq. time 0.218 sec  
Width 2352.1 Hz  
2D Width 2352.1 Hz  
4 repetitions  
256 increments  
OBSERVE H1, 499.8611751 MHz  
DATA PROCESSING  
Sine bell 0.109 sec  
F1 DATA PROCESSING  
Sine bell 0.054 sec  
FT size 1024 x 1024  
Total time 27 min, 12 sec

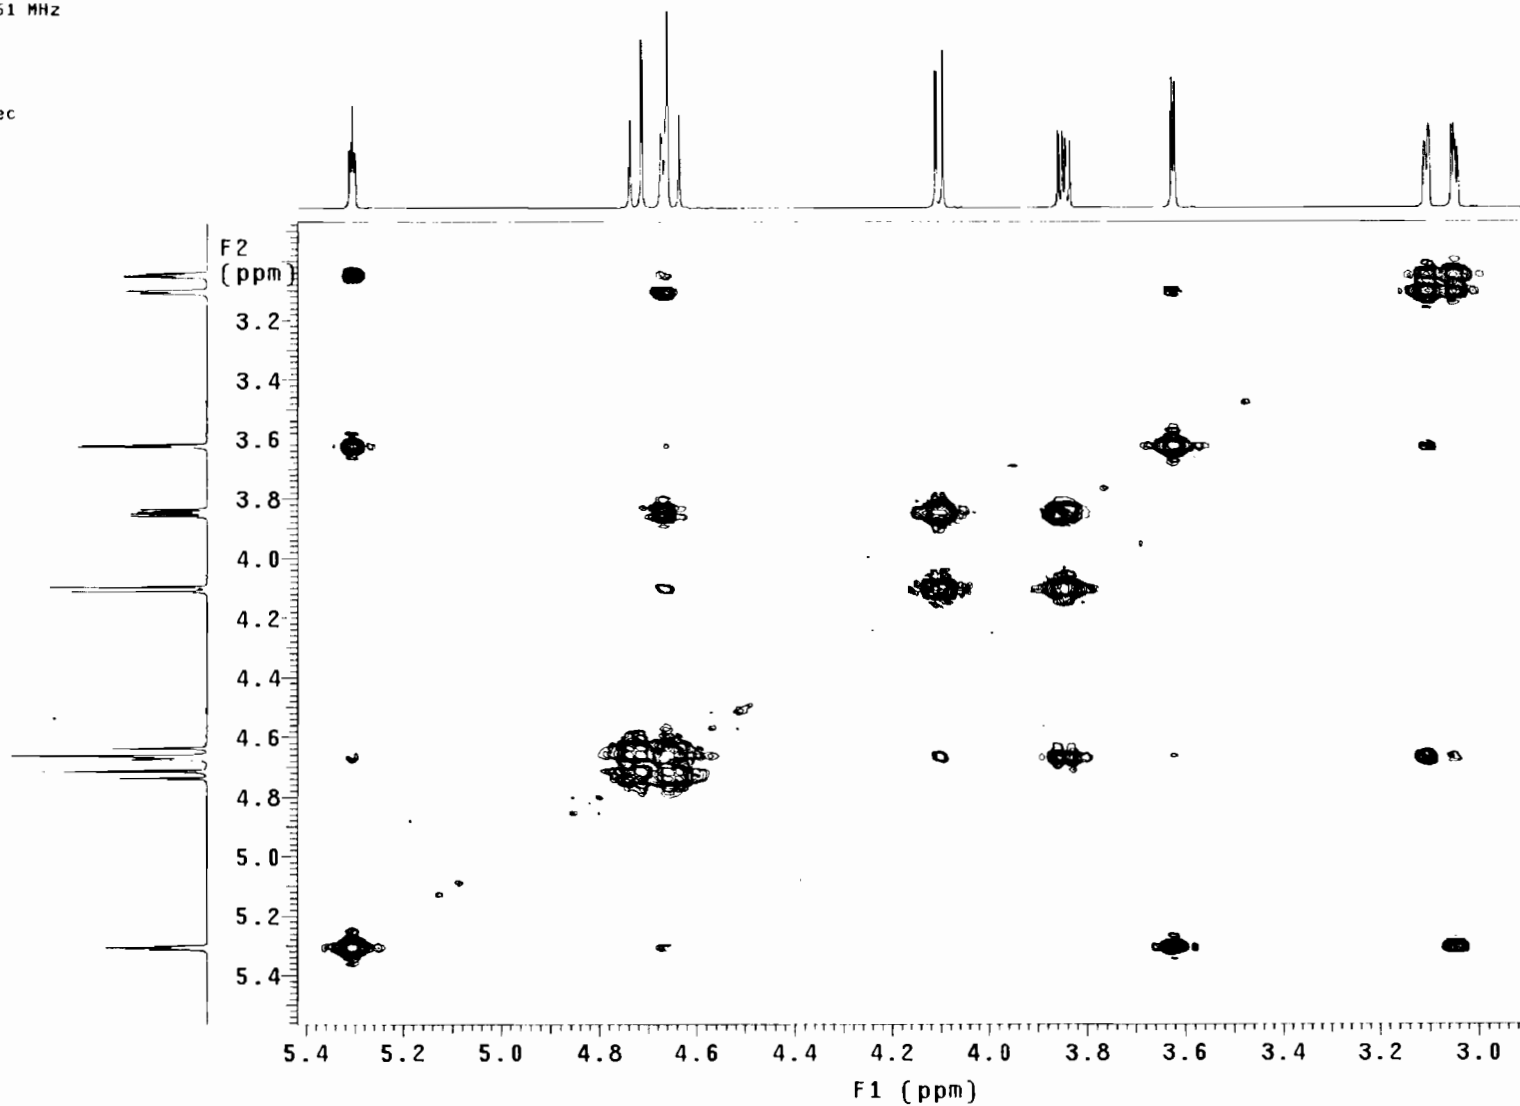

DHL-11

exp2 s2pul

| SAMPLE      |             | DEC. & VT |         |
|-------------|-------------|-----------|---------|
| date        | Sep 21 2006 | dfrq      | 499.864 |
| solvent     | CDC13       | dn        | H1      |
| file        | exp         | dpwr      | 40      |
| ACQUISITION |             |           |         |
| sfrq        | 125.702     | dm        | yyy     |
| tn          | C13         | dmm       | w       |
| at          | 1.215       | dmf       | 8787.35 |
| np          | 65536       | dseq      |         |
| sw          | 26963.3     | dres      | 1.0     |
| fb          | 15000       | homo      | n       |
| bs          | 4           |           |         |
| tpwr        | 52          | dfrq2     | 0       |
| pw          | 10.2        | dn2       |         |
| d1          | 1.800       | dpwr2     | 1       |
| tof         | 144.5       | dof2      | 0       |
| nt          | 1200        | dm2       | n       |
| ct          | 100         | dmm2      | c       |
| alock       | n           | dmf2      | 10000   |
| gain        | not used    | dseq2     |         |
|             | FLAGS       | dres2     | 1.0     |
| il          | n           | homo2     | n       |
| in          | n           |           |         |
| dp          | y           | dfrq3     | 0       |
| hs          | nn          | dn3       |         |
| DISPLAY     |             |           |         |
| sp          | 5886.8      | dpwr3     | 1       |
| wp          | 15164.4     | dof3      | 0       |
| vs          | 30          | dm3       | n       |
| sc          | 0           | dmm3      | c       |
| wc          | 250         | dmf3      | 10000   |
| hzmm        | 60.66       | dseq3     |         |
| is          | 500.00      | dres3     | 1.0     |
| rfl         | 11125.4     | homo3     | n       |
| rfp         | 9678.1      |           |         |
| th          | 2           |           |         |
| ins         | 100.000     |           |         |
| ai          | cdc ph      |           |         |
| PROCESSING  |             |           |         |
|             | lb          |           | 1.00    |
|             | wtfile      |           |         |
|             | proc        |           | ft      |
|             | fn          |           | 131072  |
|             | math        |           | f       |

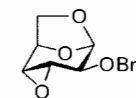

11

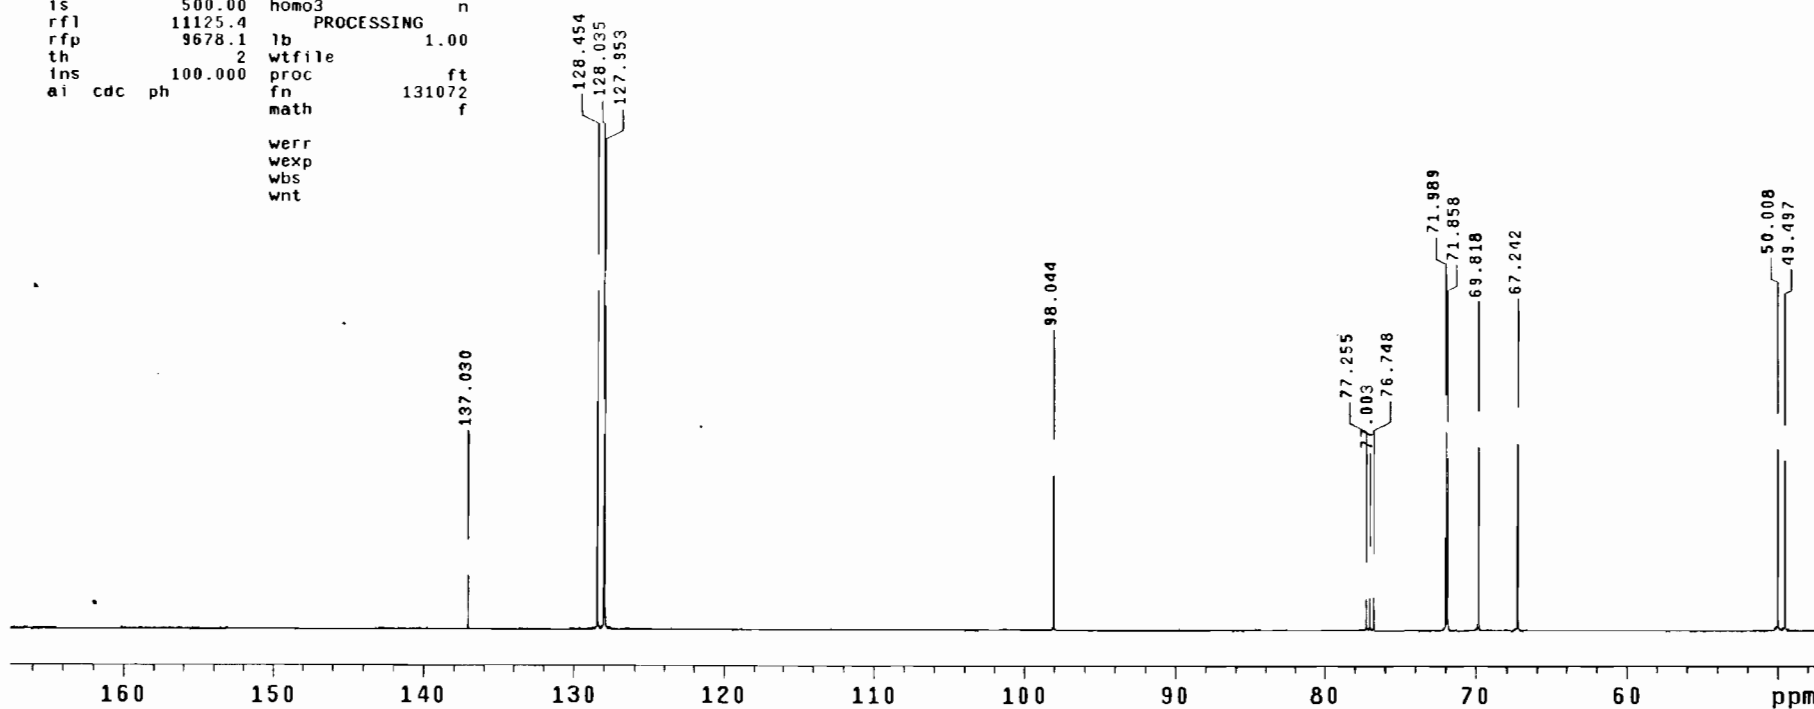

DHL-11

Pulse Sequence: dept

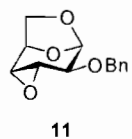

CH3 carbons

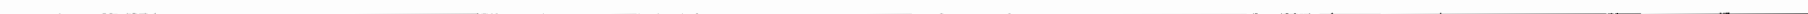

CH2 carbons

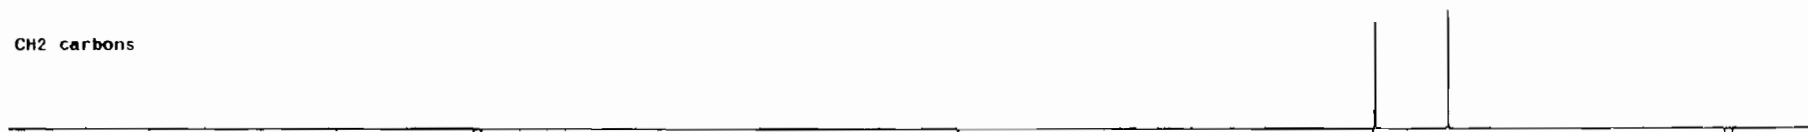

CH carbons

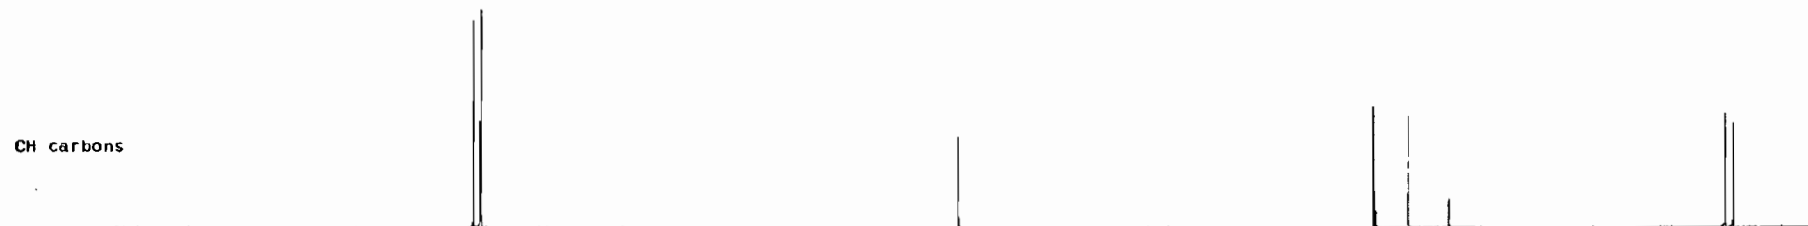

all protonated carbons

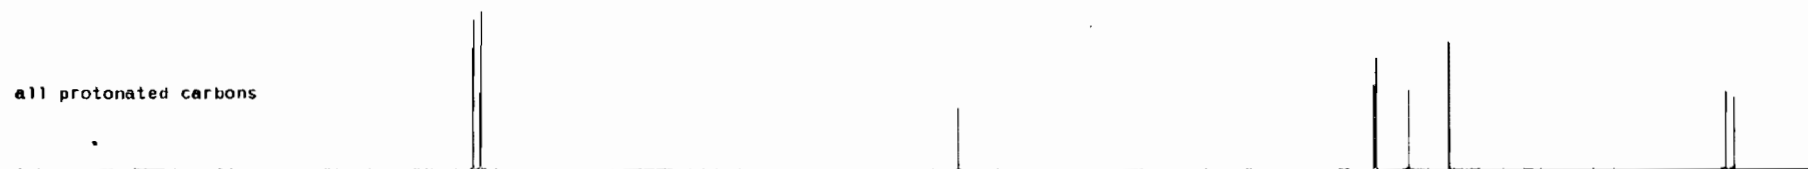

150

140

130

120

110

100

90

80

70

60

50

ppm

DHL-11

Pulse Sequence: hetcor

Solvent: CDCl<sub>3</sub>  
Ambient temperature  
User: 1-14-87  
INOVA-500 "inova5"

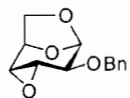

11

Relax. delay 1.500 sec  
Acq. time 0.111 sec  
Width 18403.5 Hz  
2D Width 2345.5 Hz  
4 repetitions  
256 increments  
OBSERVE C13, 125.6902113 MHz  
DECOUPLE H1, 499.8637982 MHz  
Power 40 dB  
on during acquisition  
off during delay  
WALTZ-16 modulated  
DATA PROCESSING  
Line broadening 1.0 Hz  
F1 DATA PROCESSING  
Line broadening 0.3 Hz  
FT size 4096 x 512  
Total time 28 min, 57 sec

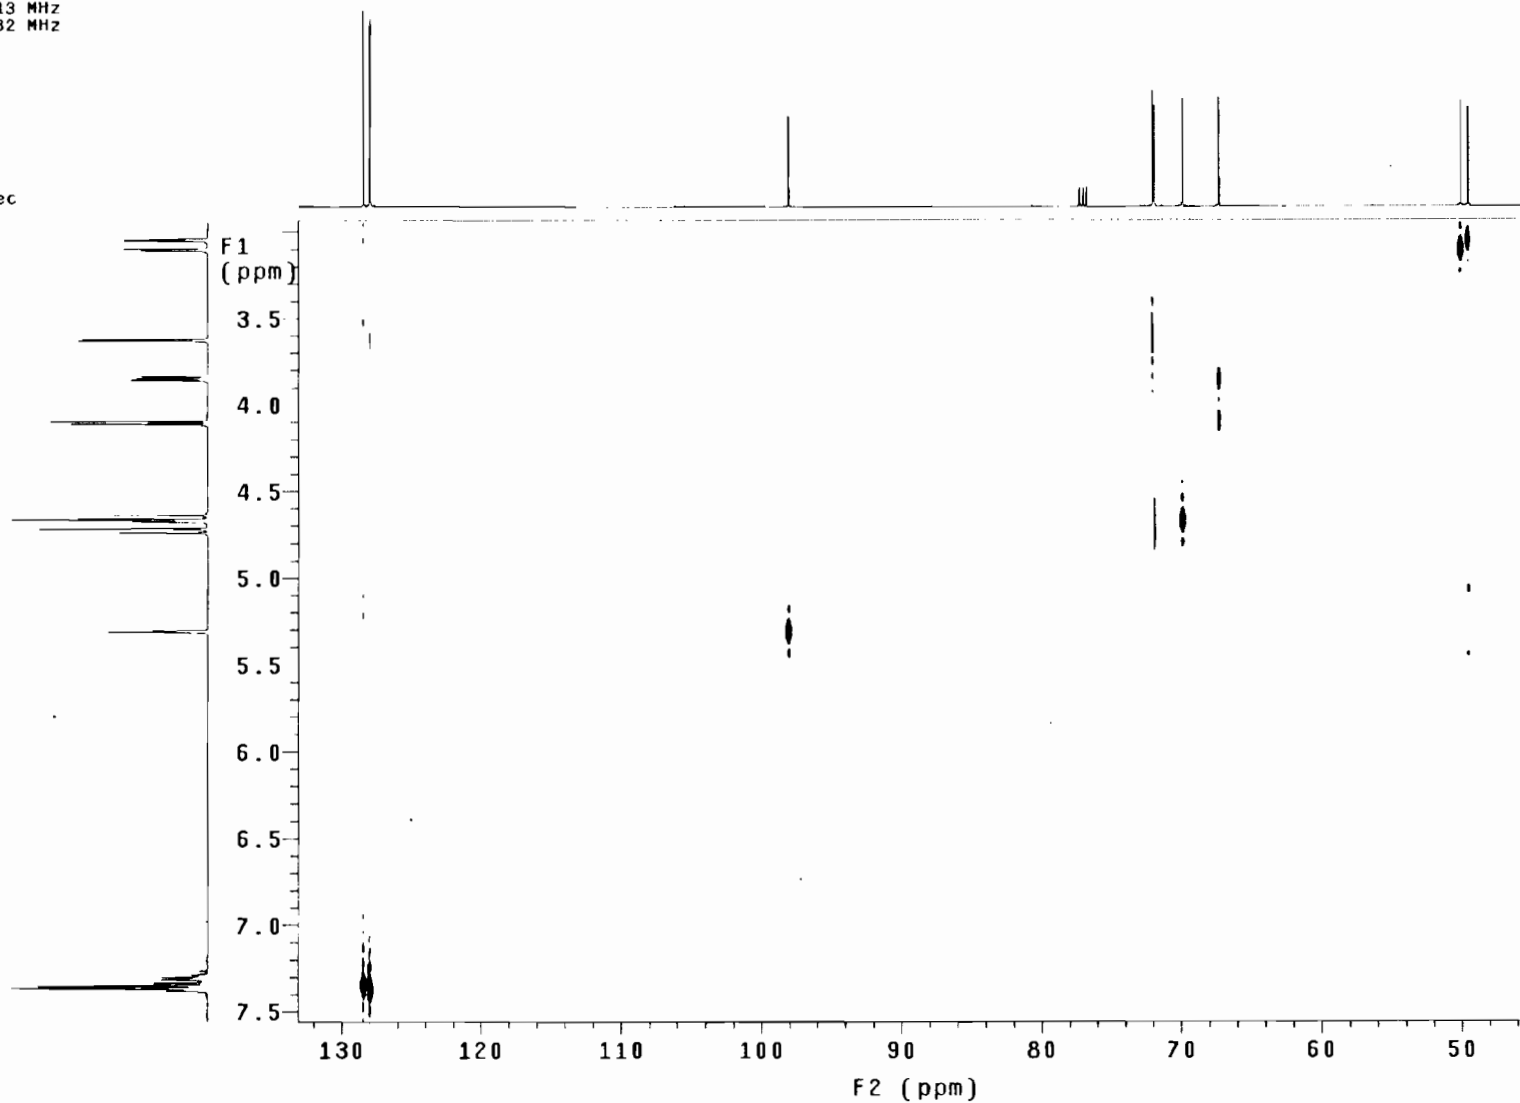

DHL-20

exp1 s2pu1

|             |             |            |             |
|-------------|-------------|------------|-------------|
| SAMPLE      |             | DEC. & VT  |             |
| date        | Dec 18 2006 | dfrq       | 499.864     |
| solvent     | CDC13       | dn         | H1          |
| file        | exp         | dpwr       | 30          |
| ACQUISITION |             | dof        | 0           |
| sfrq        | 499.864     | dm         | nnn         |
| tn          | H1          | dmm        | c           |
| at          | 5.016       | dmf        | 200         |
| np          | 65536       | dseq       |             |
| sw          | 6533.3      | dres       | 1.0         |
| fb          | 4000        | homo       | n           |
| bs          | 4           | DEC2       |             |
| tpwr        | 61          | dfrq2      | 0           |
| pw          | 13.5        | dn2        |             |
| d1          | 0.100       | dpwr2      | 1           |
| tof         | 269.9       | dof2       | 0           |
| nt          | 16          | dm2        | n           |
| ct          | 16          | dmm2       | c           |
| alock       | n           | dmf2       | 200         |
| gain        | not used    | dseq2      |             |
| FLAGS       |             | dres2      | 1.0         |
| il          | n           | homo2      | n           |
| in          | n           | DEC3       |             |
| dp          | y           | dfrq3      | 0           |
| hs          | nn          | dn3        |             |
| DISPLAY     |             | dpwr3      | 1           |
| sp          | 914.4       | dof3       | 0           |
| wp          | 4541.5      | dm3        | n           |
| vs          | 103         | dmm3       | c           |
| sc          | 0           | dmf3       | 200         |
| wc          | 250         | dseq3      |             |
| hzmm        | 18.17       | dres3      | 1.0         |
| ls          | 200.00      | homo3      | n           |
| rfl         | 510.6       | PROCESSING |             |
| rfl         | 0           | wtfile     |             |
| th          | 7           | proc       | ft          |
| ins         | 1.000       | fn         | 65536       |
| ai          | ph          | math       | f           |
|             |             | werr       |             |
|             |             | wexp       | process p1H |
|             |             | wbs        |             |
|             |             | wnt        | wft         |

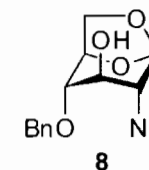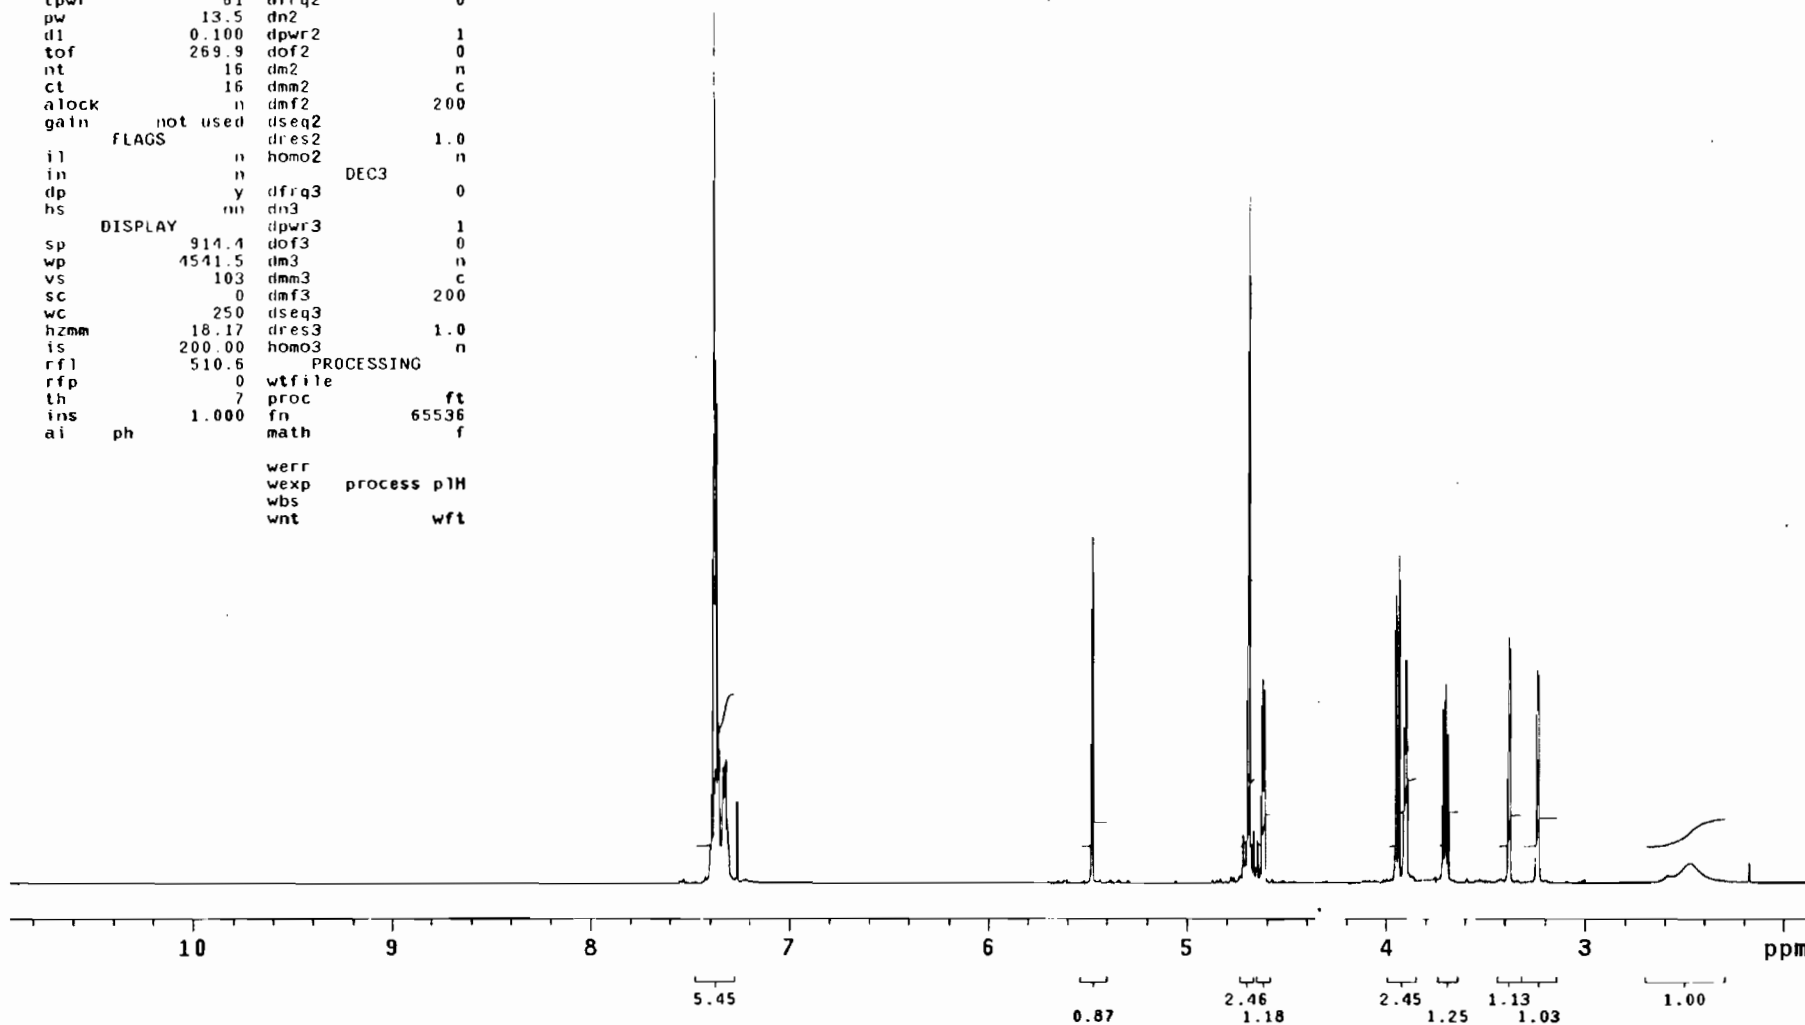

DHL-20

Pulse Sequence: relayh

Solvent: CDCl<sub>3</sub>

Ambient temperature

INOVA-500 "inova5"

Relax. delay 1.300 sec

COSY 90-90

Acq. time 0.190 sec

Width 2697.4 Hz

2D Width 2697.4 Hz

8 repetitions

256 increments

OBSERVE H1, 499.8611751 MHz

DATA PROCESSING

Sine bell 0.095 sec

F1: DATA PROCESSING

Sine bell 0.047 sec

F1 size 1024 x 1024

Total time 53 min, 1 sec

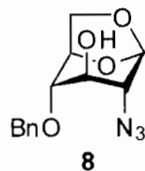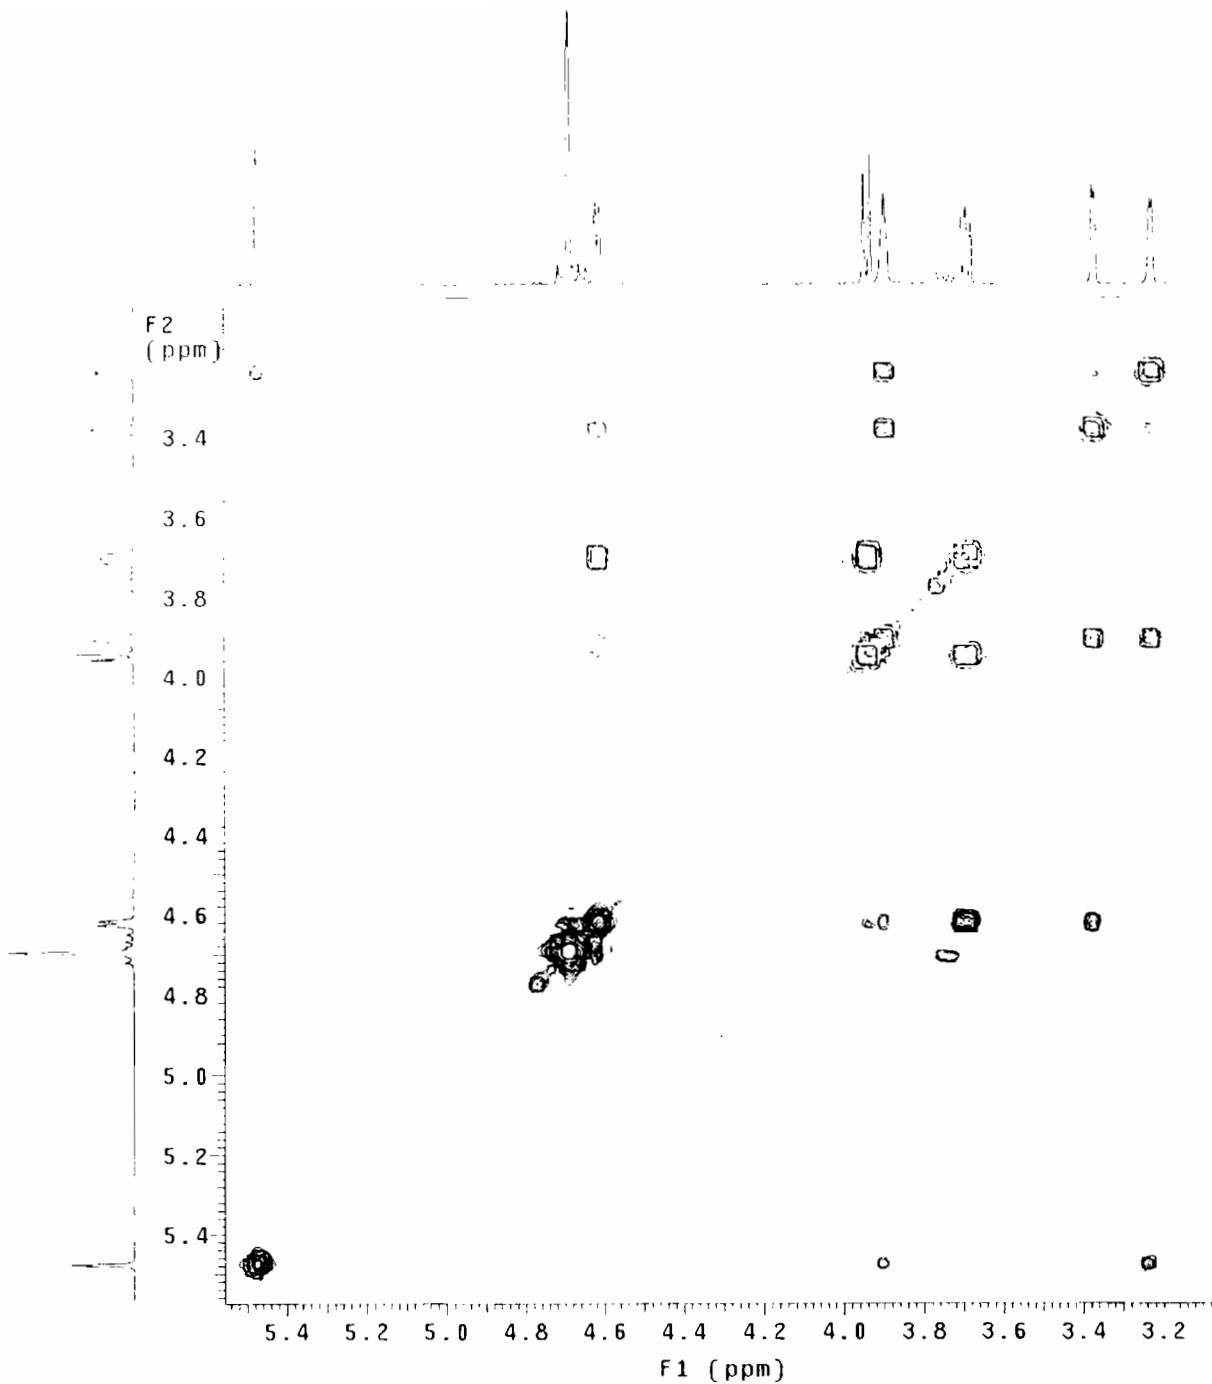

DHL-20

exp2 s2pu1

| SAMPLE      |             | DEC. & VT  |         |
|-------------|-------------|------------|---------|
| date        | Dec 18 2006 | dfrq       | 499.864 |
| solvent     | CDCl3       | dn         | 0       |
| file        | exp         | dpw1       | 40      |
| ACQUISITION |             | dof        | 0       |
| sfrq        | 125.282     | dm         | YYY     |
| tn          | 0.13        | dmm        | W       |
| at          | 1.215       | dmf        | 8787.35 |
| ap          | 65536       | dlc        |         |
| sw          | 26963.1     | dre        | 1.0     |
| fb          | 15000       | homo       | n       |
| bs          | 8           | DEC2       |         |
| tpwr        | 52          | dtrq2      | 0       |
| pw          | 10.1        | dn2        |         |
| dl          | 1.888       | dpw2       | 1       |
| tof         | 144.5       | dof2       | 0       |
| nt          | 1.00        | dm2        | n       |
| ct          | 120         | dmm2       | C       |
| alock       | n           | dmt2       | 10000   |
| gatu        | not used    | dlc2       |         |
| FLAGS       |             | dre2       | 1.0     |
| rl          | n           | homo2      | n       |
| rn          | n           | DEC3       |         |
| dp          | y           | dtrq3      | 0       |
| hs          | nn          | dn3        |         |
| DISPLAY     |             | dpw3       | 1       |
| sp          | 6012.4      | dof3       | 0       |
| wp          | 15893.2     | dm3        | n       |
| vs          | 122         | dmm3       | C       |
| sc          | 0           | dmt3       | 10000   |
| wc          | 250         | dtrq3      |         |
| hzmm        | 60.37       | dre3       | 1.0     |
| is          | 500.00      | homo3      | n       |
| rf1         | 11111.8     | PROCESSING |         |
| rfp         | 9678.1      | lb         | 1.00    |
| th          | 5           | wtfile     |         |
| ins         | 100.000     | proc       | ft      |
| ai          | cdc ph      | fn         | 1.01072 |
|             |             | math       | f       |

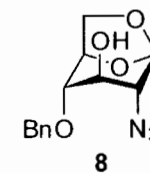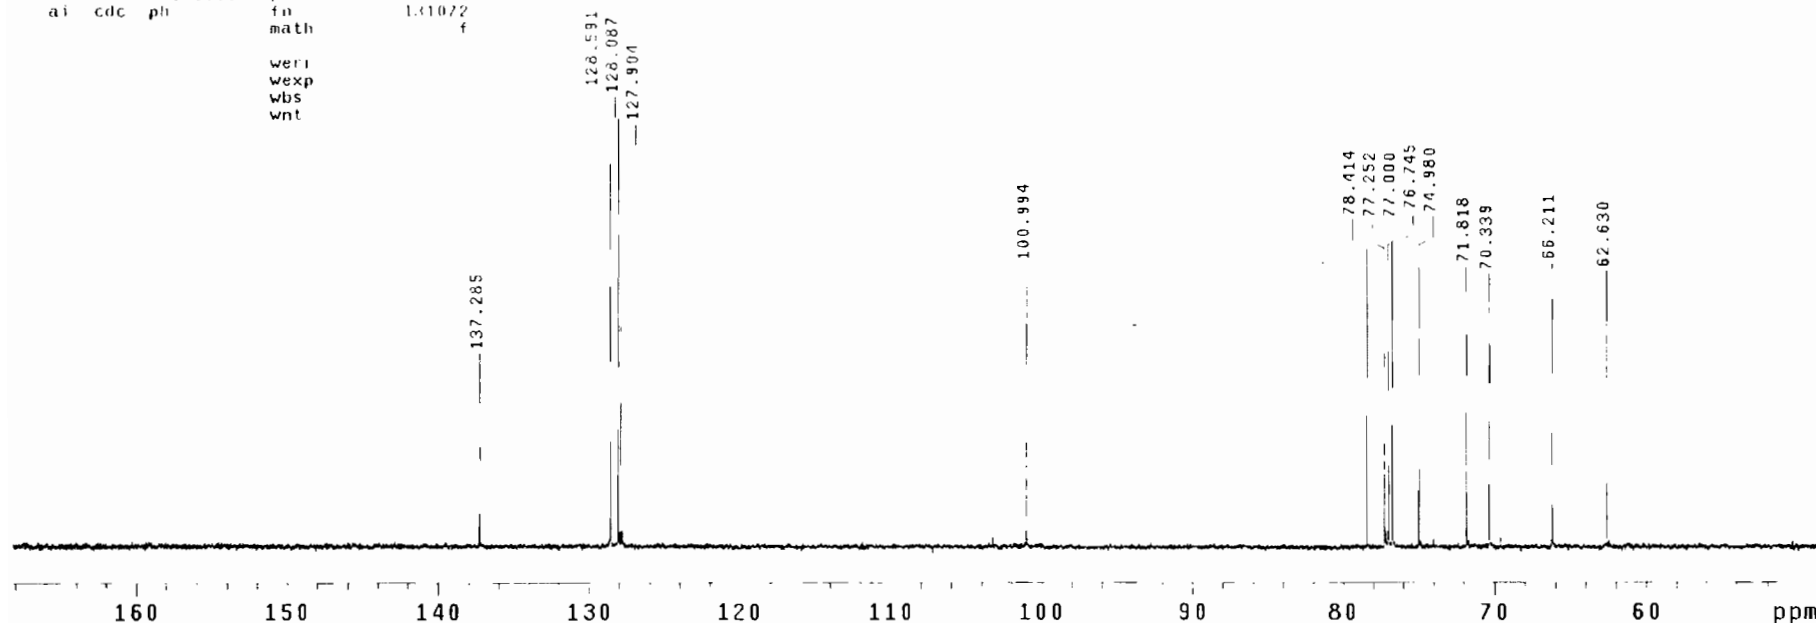

DHL-20

Pulse Sequence: dept

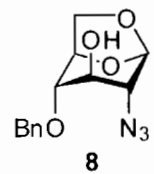

CH3 carbons

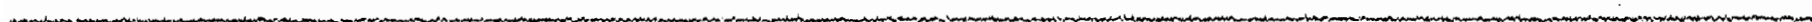

CH2 carbons

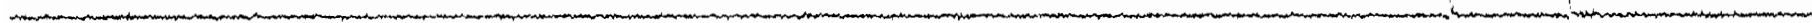

CH carbons

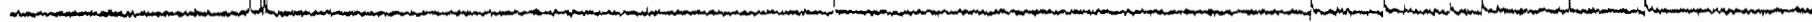

all protonated carbons

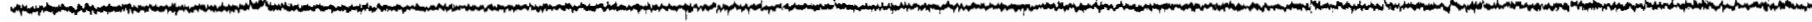

130 120 110 100 90 80 70 60 ppm

DHL-20

Pulse Sequence: hetcor

Solvent: CDCl<sub>3</sub>

Ambient temperature

User: 1-14-87

INOVA-500 "inova5"

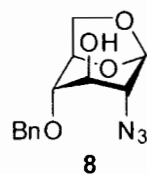

Relax. delay 1.500 sec

Acq. time 0.111 sec

Width 18403.5 Hz

2D Width 1654.1 Hz

8 repetitions

128 increments

OBSERVE C13, 125.6901977 MHz

DECOUPLE H1, 499.8631209 MHz

Power 40 dB

on during acquisition

off during delay

WALTZ-16 modulated

DATA PROCESSING

Line broadening 1.0 Hz

F1 DATA PROCESSING

Line broadening 0.3 Hz

f1 size 4096 x 256

Total time 28 min, 40 sec

F1  
(ppm)

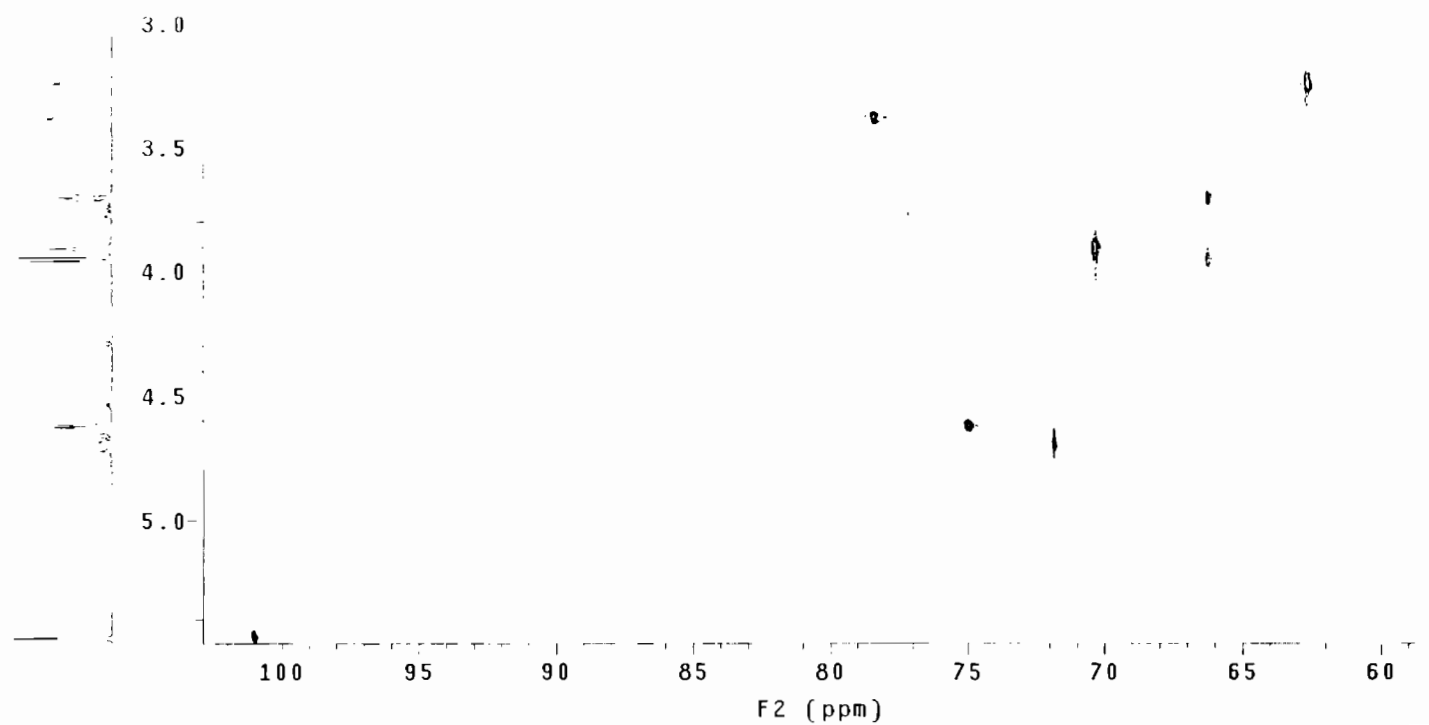

NHL-67

exp1 s2pul

| SAMPLE      |             | DEC. & VT  |            |
|-------------|-------------|------------|------------|
| date        | May 22 2008 | dfrq       | 599.876    |
| solvent     | cdcl3       | dn         | H1         |
| file        | exp         | dpwr       | 30         |
| ACQUISITION |             | dof        | 0          |
| sfrq        | 599.876     | dm         | nnn        |
| tn          | H1          | dmm        | c          |
| at          | 3.621       | dmf        | 200        |
| np          | 43516       | dseq       |            |
| sw          | 6009.6      | dres       | 1.0        |
| fb          | 2600        | homo       | n          |
| bs          | 4           | temp       | 22.0       |
| tpwr        | 59          | DEC2       |            |
| pw          | 14.0        | dfrq2      | 0          |
| dl          | 0.380       | dn2        |            |
| tof         | -299.9      | dpwr2      | 1          |
| nt          | 16          | dof2       | 0          |
| ct          | 16          | dm2        | n          |
| alock       | y           | dmm2       | c          |
| gain        | not used    | dmf2       | 200        |
| FLAGS       |             | dseq2      |            |
| il          | n           | dres2      | 1.0        |
| in          | n           | homo2      | n          |
| dp          | y           | PROCESSING |            |
| hs          | nn          | wtfile     |            |
| DISPLAY     |             | proc       | ft         |
| sp          | 752.6       | fn         | 65536      |
| wp          | 4915.8      | math       | f          |
| vs          | 227         |            |            |
| sc          | 0           | werr       |            |
| wc          | 250         | wexp       | process pH |
| hzmm        | 19.66       | whs        |            |
| is          | 187.20      | wnt        |            |
| rfl         | 305.4       |            |            |
| rfp         | 0           |            |            |
| th          | 50          |            |            |
| ins         | 1.000       |            |            |
| ai          | cdc ph      |            |            |

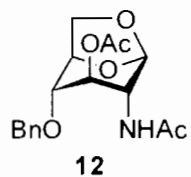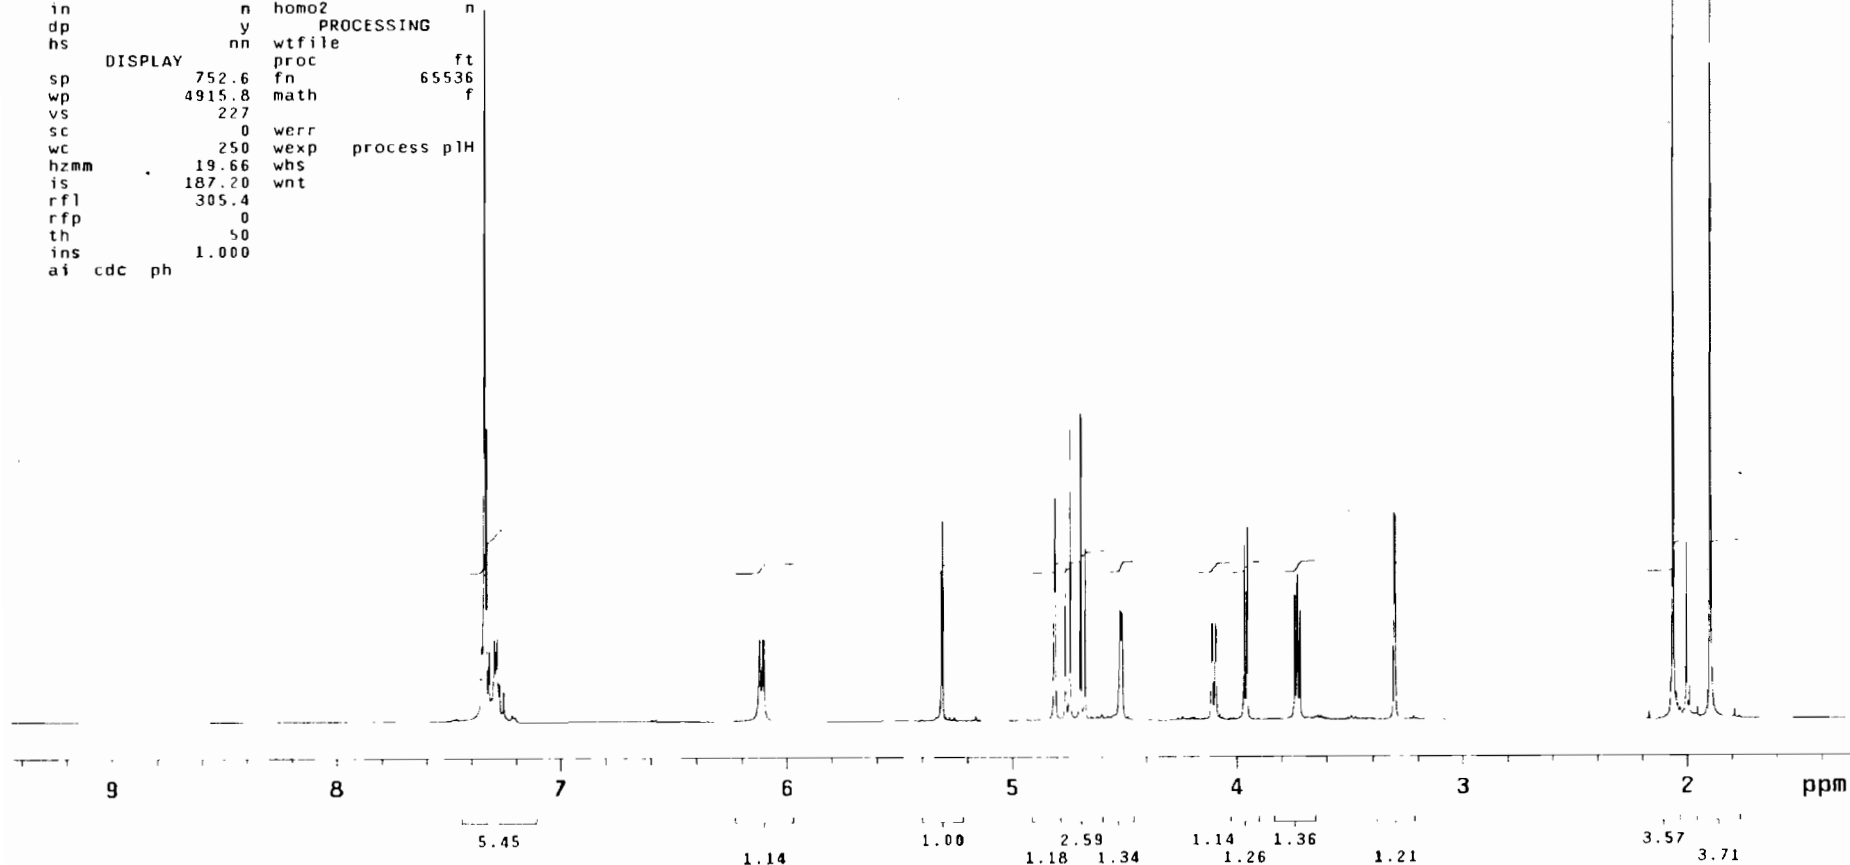

DHL-71

File: afs/nd.edu/user26/dhesek/Private/DHL/DHL-71\_HH.fid

Pulse Sequence: COSY

Solvent: cdc13  
Temp: 22.0 C / 295.1 K  
Operator: dhesek  
File: DHL-71\_HH  
VNMR5-600 "nmr600"

Relax. delay 1.000 sec  
Acq. time 0.128 sec  
Width 4807.7 Hz  
2D Width 4807.7 Hz  
4 repetitions  
256 increments  
OBSERVE H1, 599.8728575 MHz  
DATA PROCESSING  
Sine bell 0.064 sec  
F1 DATA PROCESSING  
Sine bell 0.043 sec  
FT size 2048 x 2048  
Total time 20 min, 15 sec

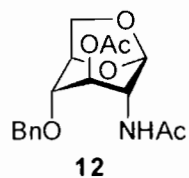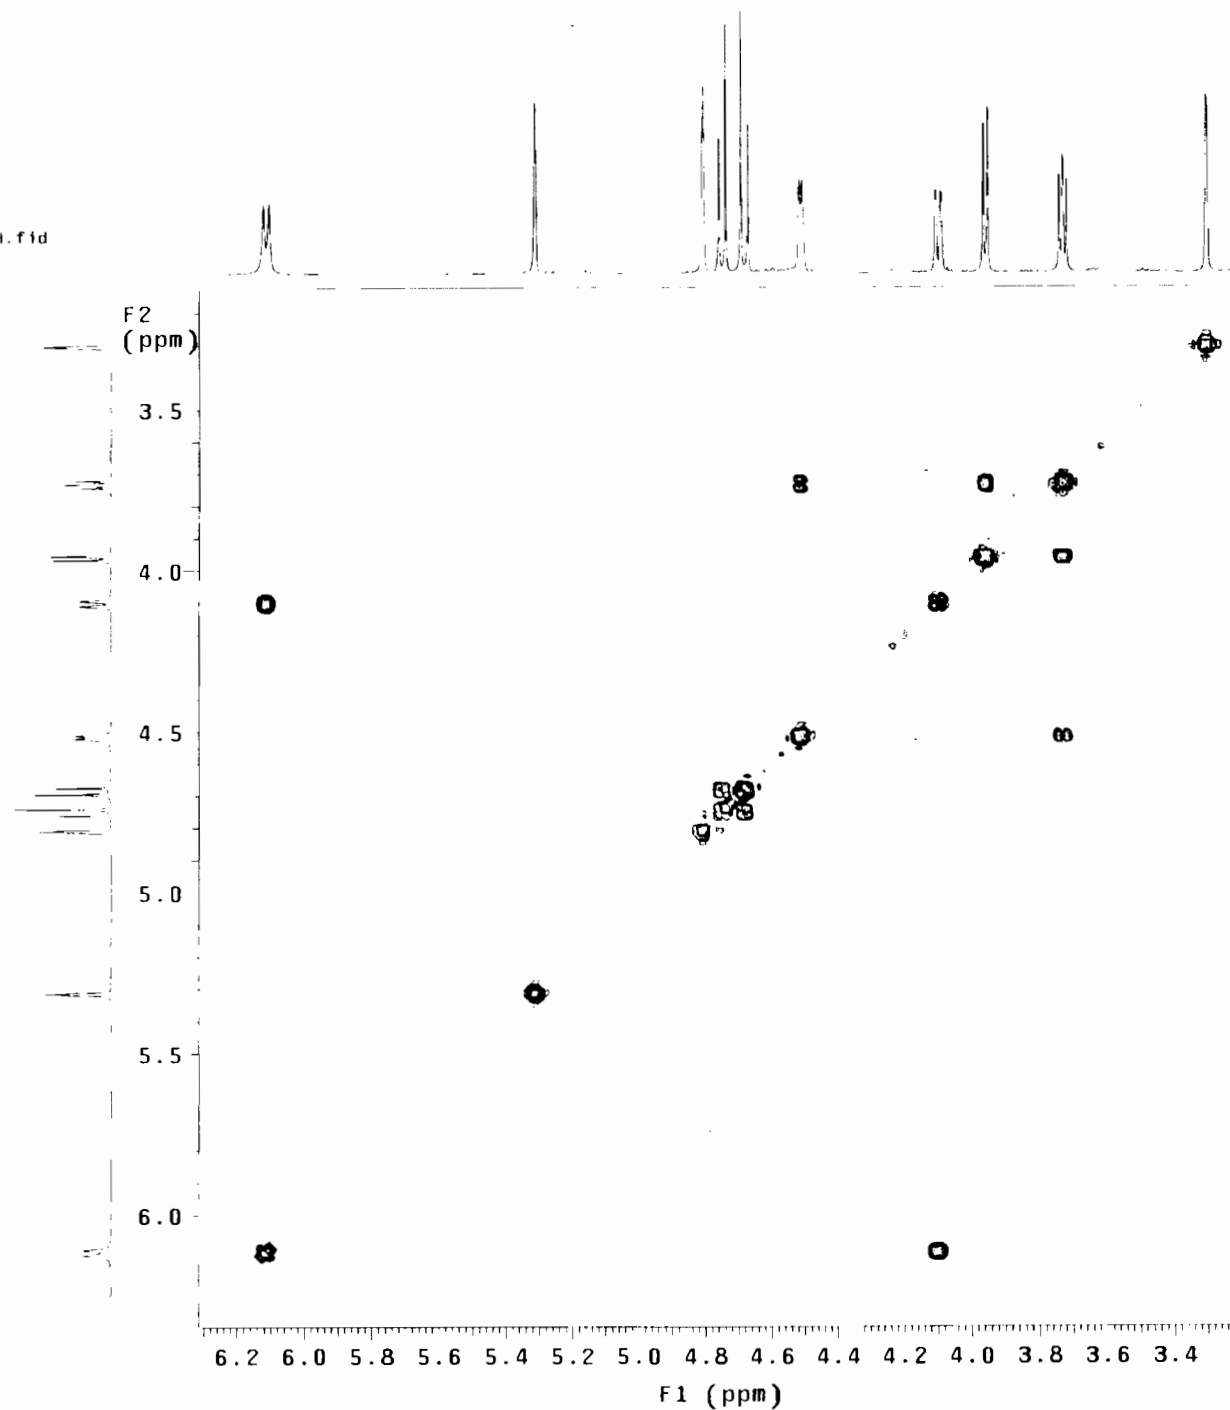

DHL-71

exp3 Carbon

|             |             |            |          |
|-------------|-------------|------------|----------|
| SAMPLE      |             | SPECIAL    |          |
| date        | May 22 2008 | temp       | 22.0     |
| solvent     | cd3od       | gain       | not used |
| file        | exp         | spin       | not used |
| ACQUISITION |             | hst        | 0.008    |
| sw          | 36764.7     | pw90       | 7.500    |
| at          | 1.783       | alfa       | 10.000   |
| np          | 131072      | FLAGS      |          |
| fb          | 17000       | il         | n        |
| bs          | 4           | in         | n        |
| dl          | 1.220       | dp         | y        |
| nt          | 512         | hs         | nn       |
| ct          | 40          | PROCESSING |          |
| tn          | C13         | lb         | 0.50     |
| sfrq        | 150.855     | fn         | 262144   |
| tof         | 1542.7      | sp         | 1544.1   |
| tpwr        | 58          | wp         | 25669.8  |
| pw          | 7.500       | rfl        | 13586.1  |
| DECOUPLER   |             | rfl        | 11649.3  |
| dn          | H1          | rp         | -117.2   |
| do          | 0           | lp         | 30.3     |
| dm          | yyy         | PLOT       |          |
| dmm         | w           | wc         | 250      |
| dpwr        | 44          | sc         | 0        |
| dmf         | 13908       | vs         | 90       |
|             |             | th         | 3        |
|             |             | ai         | cdc ph   |

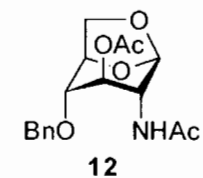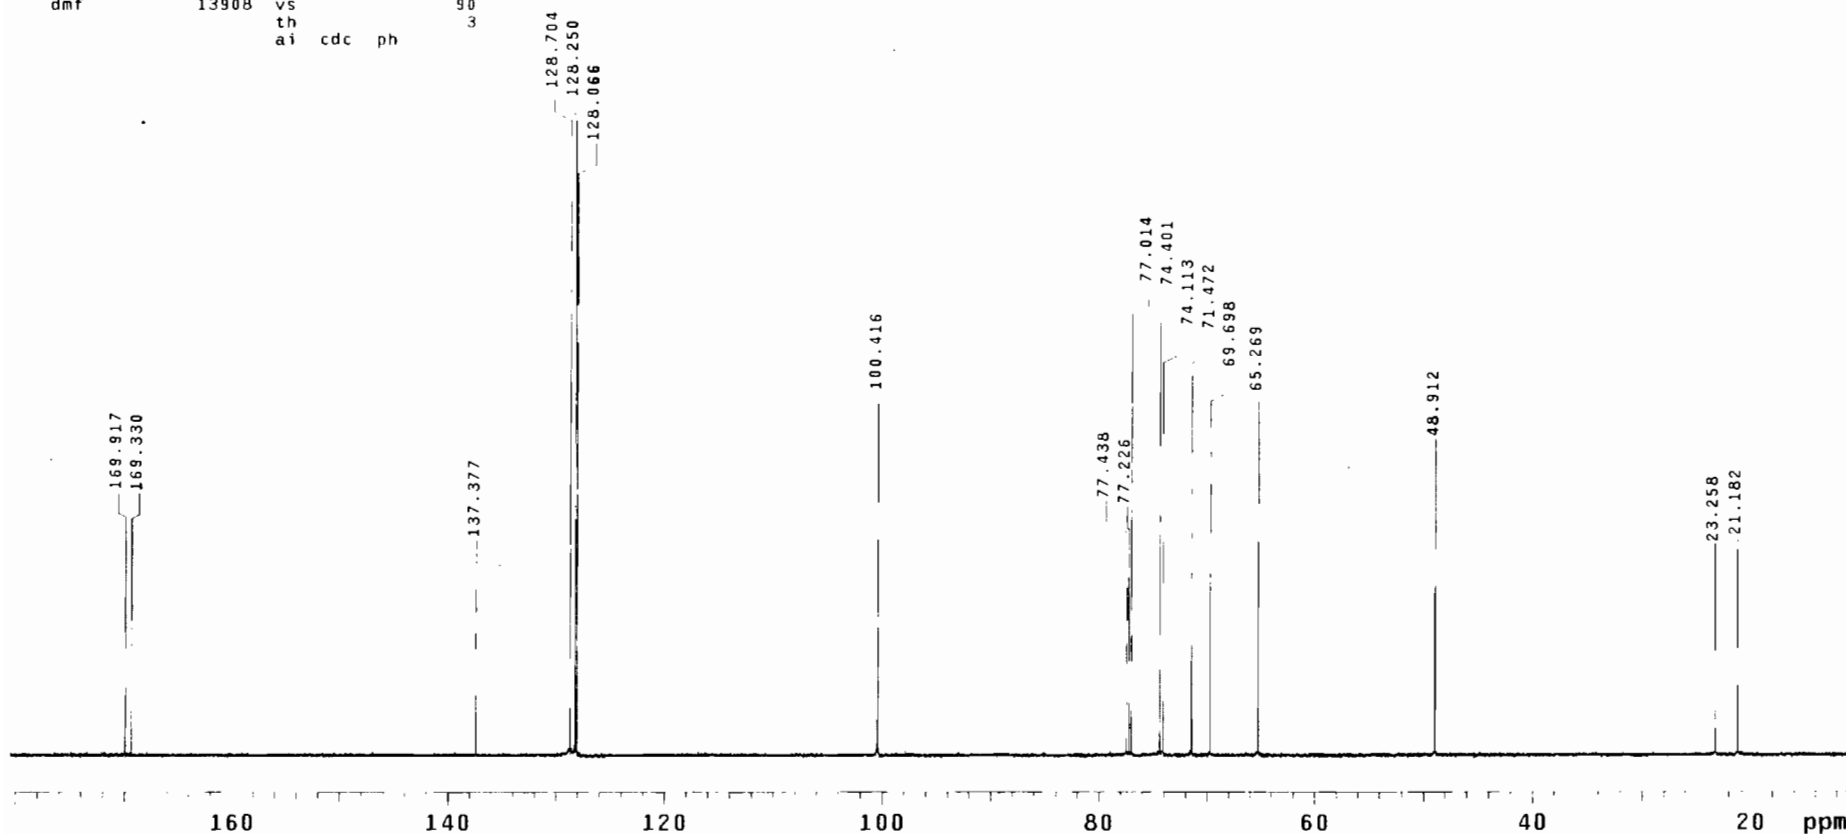

DHL-71

Pulse Sequence: dept

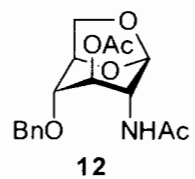

CH3 carbons

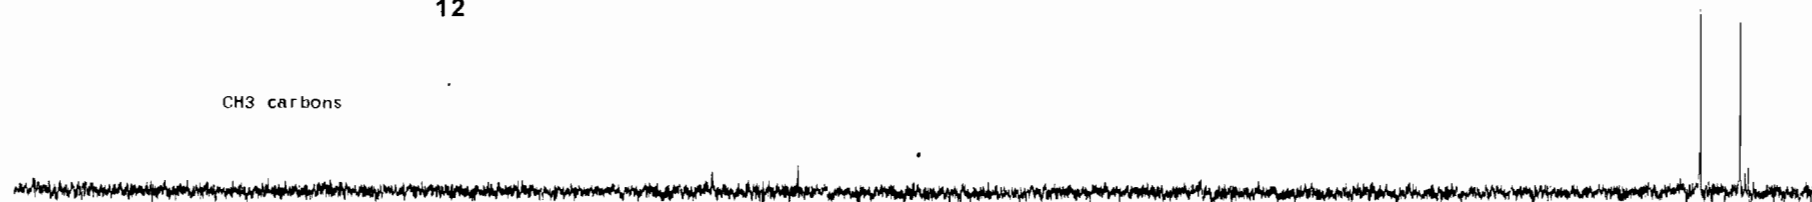

CH2 carbons

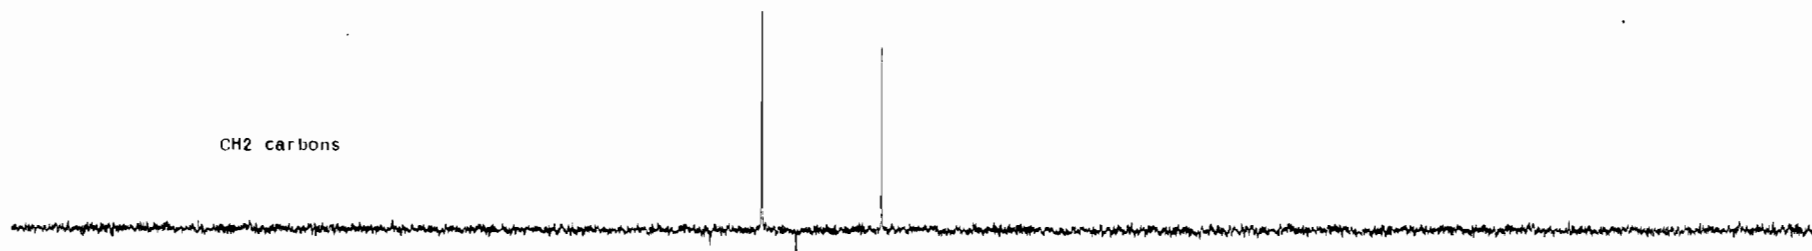

CH carbons

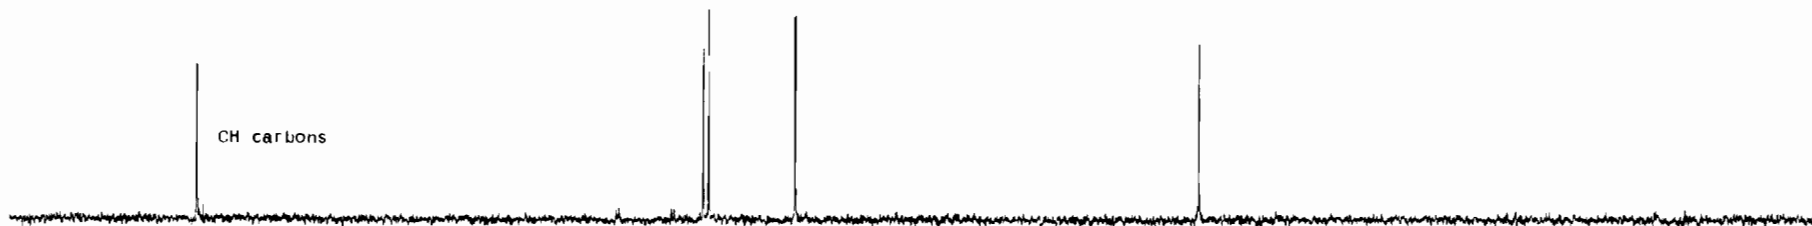

all protonated carbons

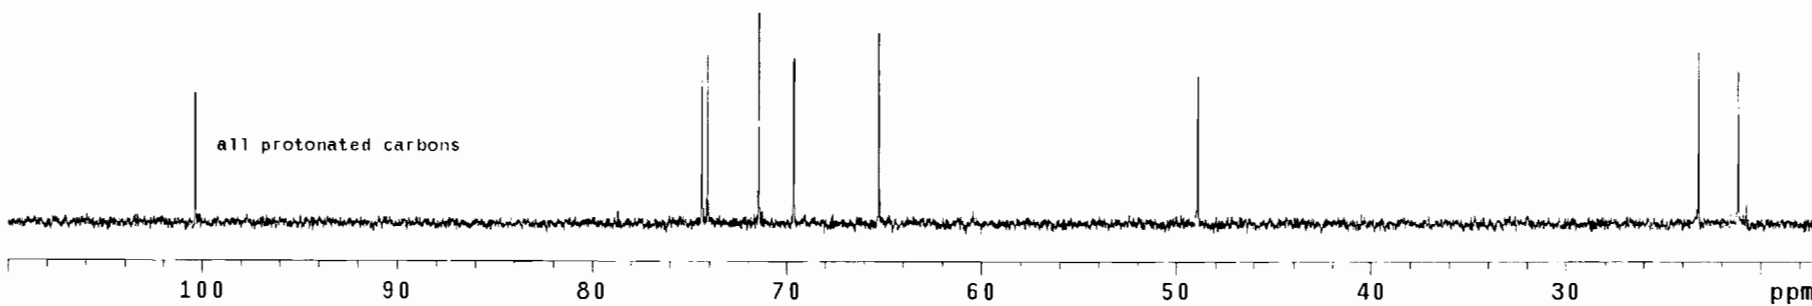

DHL-71

Pulse Sequence: hetcor

Solvent: CDC13

Ambient temperature

UNITYplus-300 "nmr3a.chem.nd.edu"

Relax. delay 1.500 sec

Acq. time 0.179 sec

Width 11471.2 Hz

2D Width 1790.8 Hz

4 repetitions

128 increments

OBSERVE C13, 75.4216934 MHz

DECOUPLE H1, 299.9482565 MHz

Power 40 dB

on during acquisition

off during delay

WALTZ-16 modulated

DATA PROCESSING

Line broadening 1.0 Hz

F1 DATA PROCESSING

Line broadening 0.3 Hz

FT size 4096 x 512

Total time 14 min, 57 sec

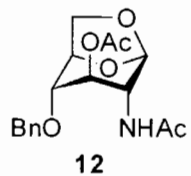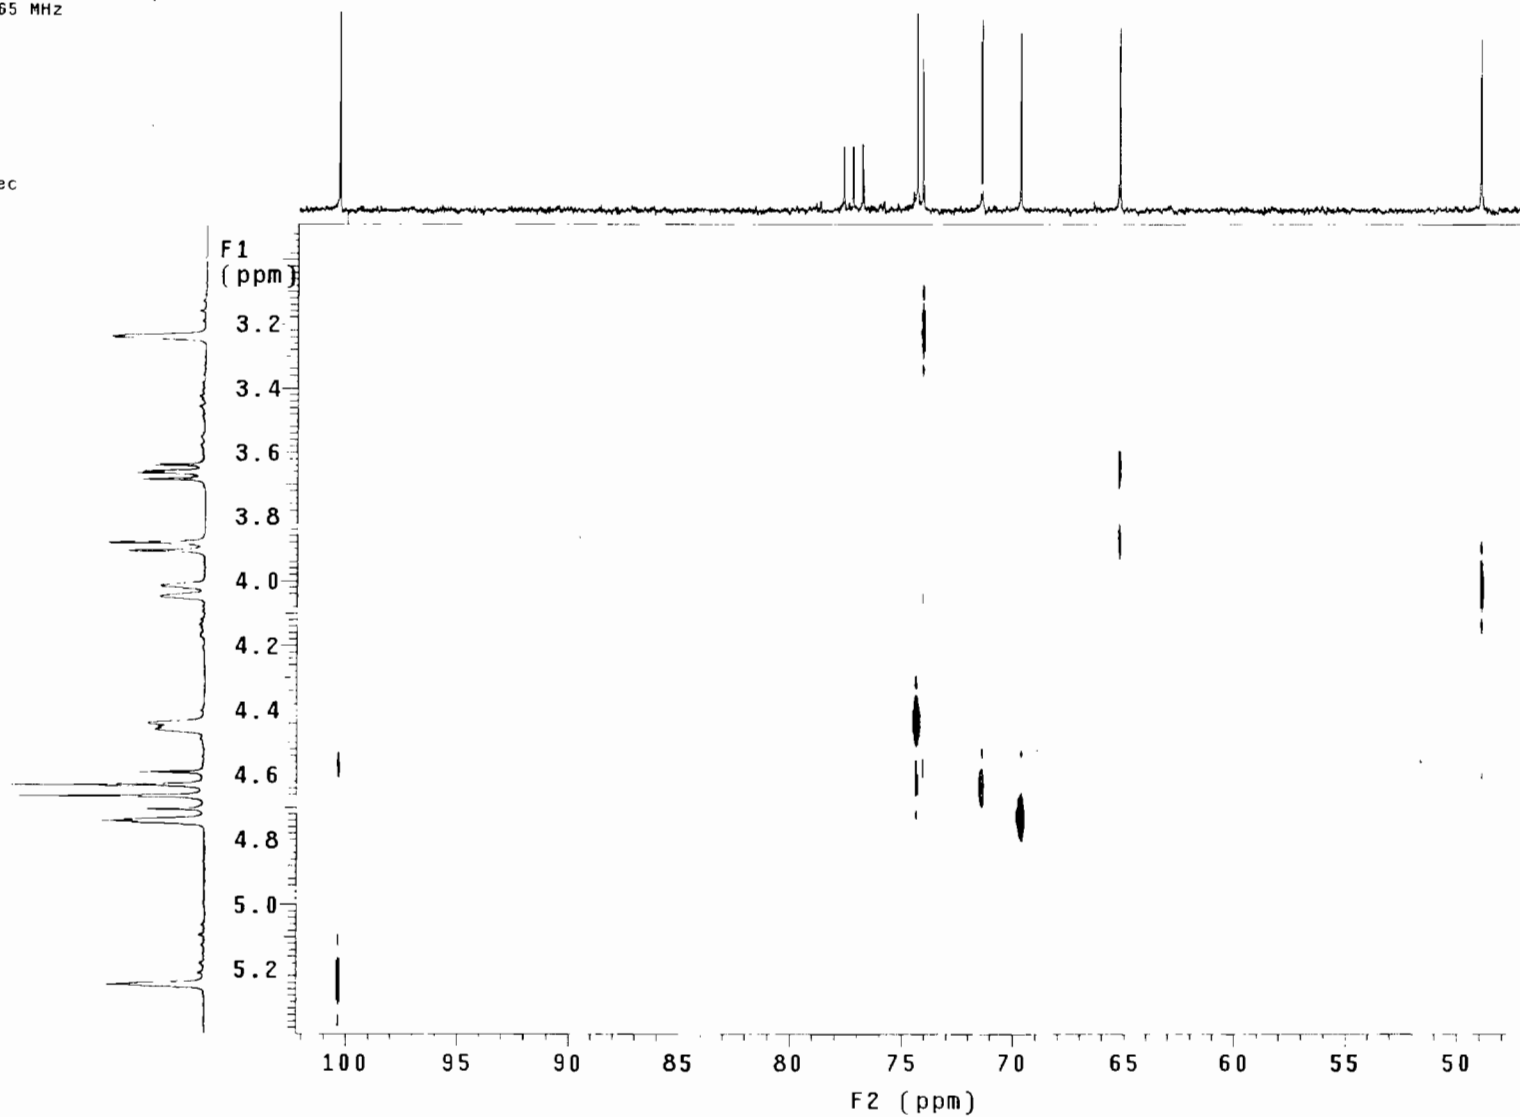

DHL-72

exp1 s2pu1

| SAMPLE      |             | DEC. & VT  |            |
|-------------|-------------|------------|------------|
| date        | May 27 2008 | dfrq       | 499.864    |
| solvent     | CDC13       | dn         | H1         |
| file        | exp         | dpwr       | 30         |
| ACQUISITION |             |            |            |
| sfrq        | 499.864     | dof        | 0          |
| tn          | H1          | dm         | nmn        |
| at          | 5.016       | dmm        | C          |
| np          | 65536       | dseq       | 200        |
| sw          | 6533.3      | dres       | 1.0        |
| fb          | 4000        | homo       | n          |
| bs          | 4           |            |            |
| tpwr        | 61          | dfrq2      | 0          |
| pw          | 13.5        | dn2        |            |
| dl          | 0.100       | dpwr2      | 1          |
| tof         | 269.9       | dof2       | 0          |
| nt          | 16          | dm2        | n          |
| ct          | 16          | dmm2       | C          |
| alock       | n           | dmf2       | 200        |
| gain        | not used    | dseq2      |            |
|             | FLAGS       | dres2      | 1.0        |
| il          | n           | homo2      | n          |
| in          | n           |            |            |
| dp          | y           | dfrq3      | 0          |
| hs          | nn          | dn3        |            |
|             | DISPLAY     | dpwr3      | 1          |
| sp          | 502.5       | dof3       | 0          |
| wp          | 5004.8      | dm3        | n          |
| vs          | 68          | dmm3       | C          |
| sc          | 0           | dinf3      | 200        |
| wc          | 250         | dseq3      |            |
| hzmm        | 20.02       | dres3      | 1.0        |
| is          | 100.00      | homo3      | n          |
| rfl         | 510.6       |            |            |
| rfp         | 0           | PROCESSING |            |
| th          | 7           | wf file    | ft         |
| ins         | 1.000       | proc       | fn         |
| ai          | ph          | math       | f          |
|             |             | werr       |            |
|             |             | wexp       | process pH |
|             |             | wbs        |            |
|             |             | wnt        | wft        |

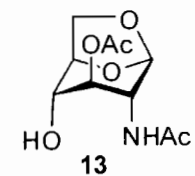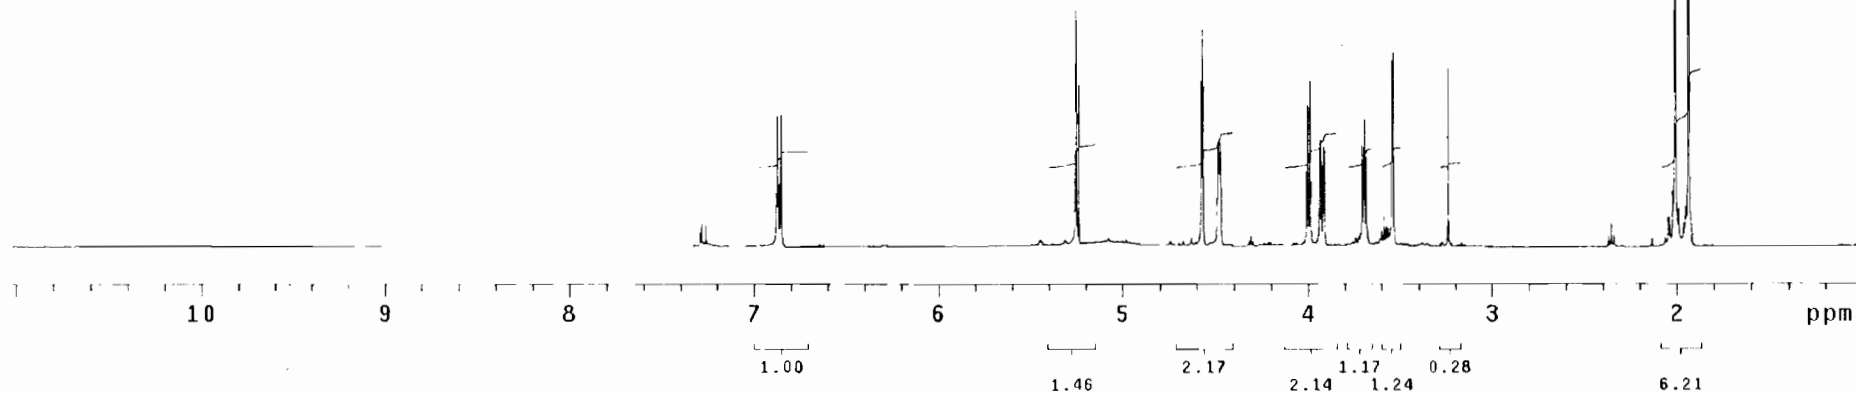

DHL-72

Pulse Sequence: relayh

Solvent: CDCl<sub>3</sub>

Ambient temperature

INOVA-500 "nmr2a.chem.nd.edu"

Relax. delay 1.300 sec

COSY 90-90

Acq. time 0.172 sec

Width 2970.3 Hz

2D Width 2970.3 Hz

4 repetitions

256 increments

OBSERVE H1, 499.8611751 MHz

DATA PROCESSING

Sine bell 0.086 sec

F1 DATA PROCESSING

Sine bell 0.043 sec

FT size 1024 x 1024

Total time 26 min, 14 sec

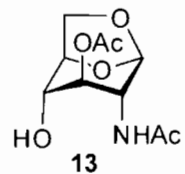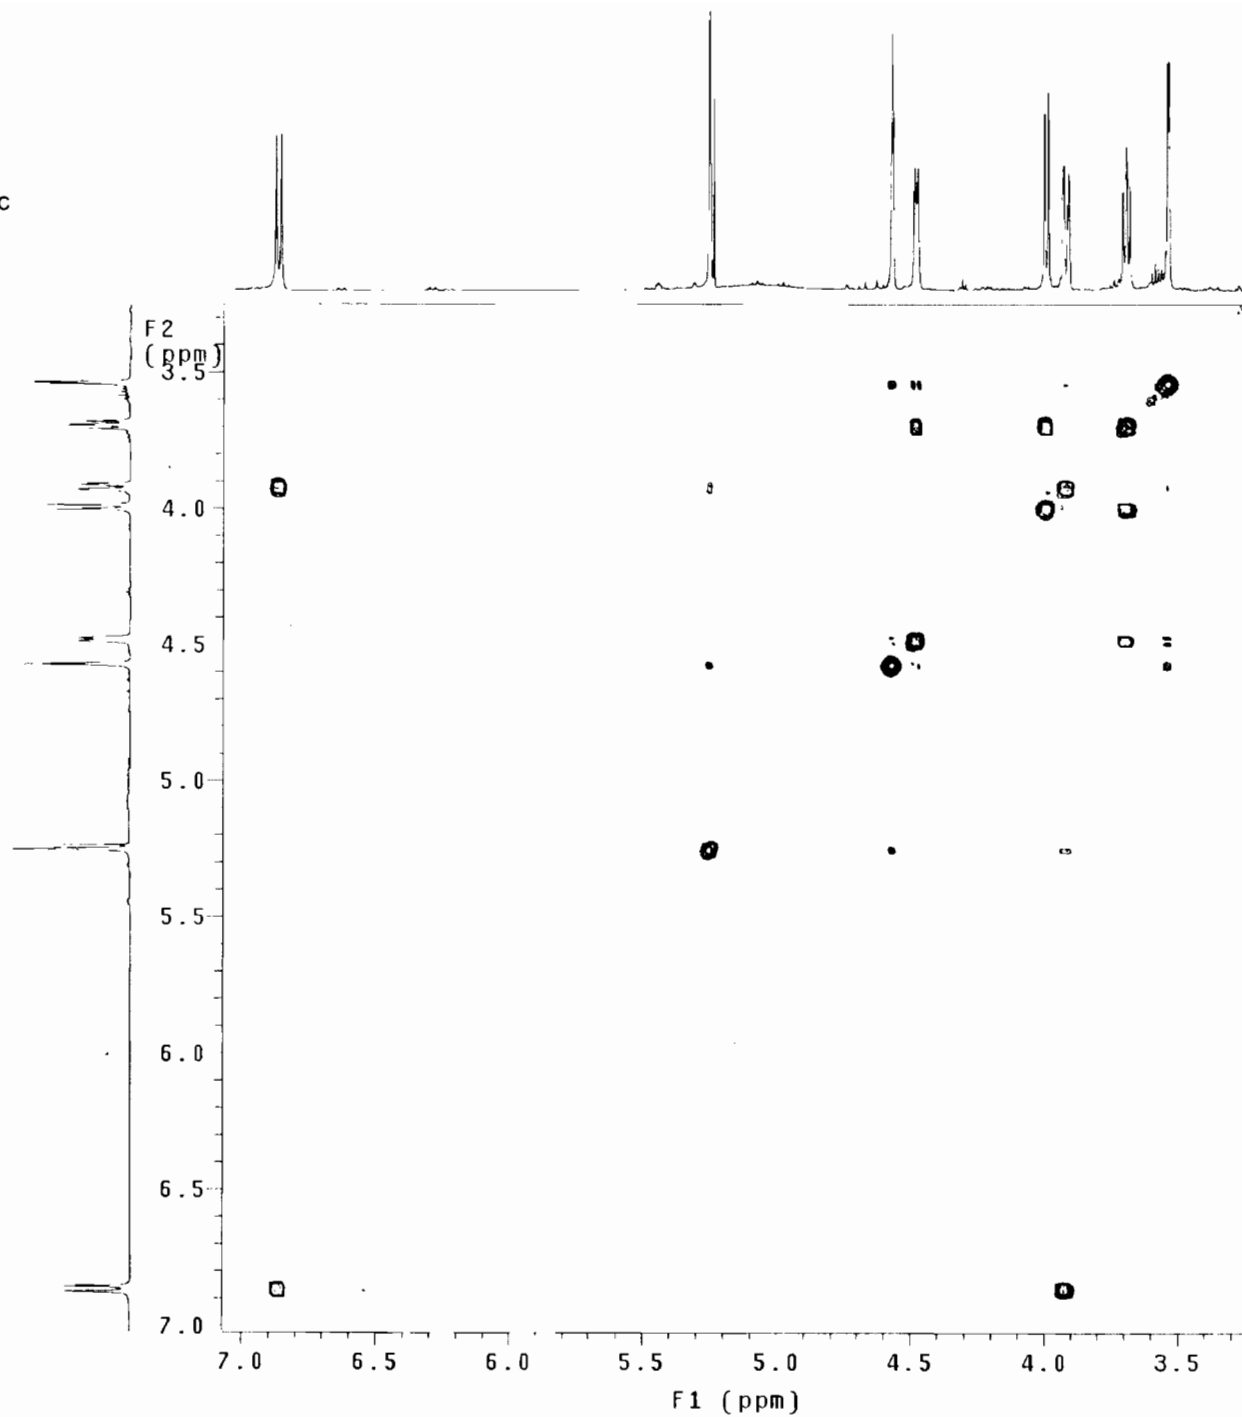

MIL-71

STANDARD PROTON PARAMETERS

exp2 s2pu1

| SAMPLE      |             | DEC. & VT  |         |
|-------------|-------------|------------|---------|
| date        | May 27 2008 | dfrq       | 499.864 |
| solvent     | CDC13       | dn         | H1      |
| file        | exp         | dpwr       | 40      |
| ACQUISITION |             |            |         |
| sfrq        | 125.702     | dof        | 0       |
| tn          | C13         | dm         | yyy     |
| at          | 1.215       | dmm        | w       |
| np          | 65536       | dseq       | 8787.35 |
| sw          | 26963.3     | dres       | 1.0     |
| fb          | 15000       | homo       | n       |
| bs          | 4           | DEC2       |         |
| tpwr        | 52          | dfrq2      | 0       |
| pw          | 10.2        | dn2        |         |
| dl          | 1.800       | dpwr2      | 1       |
| tof         | 144.5       | dof2       | 0       |
| nt          | 640         | dm2        | n       |
| ct          | 161         | dmm2       | c       |
| alock       | n           | dlnf2      | 10000   |
| gain        | not used    | dseq2      |         |
| il          | FLAGS       | dres2      | 1.0     |
| in          | n           | homo2      | n       |
| dp          | y           | DEC3       |         |
| hs          | nn          | dfrq3      | 0       |
| sp          | DISPLAY     | dn3        |         |
| wp          | 1833.2      | dpwr3      | 1       |
| vs          | 20768.4     | dof3       | 0       |
| sc          | 61          | dm3        | n       |
| wc          | 0           | dmm3       | c       |
| hzmm        | 250         | dlnf3      | 10000   |
| is          | 83.07       | dseq3      |         |
| rfl         | 500.00      | dres3      | 1.0     |
| rfp         | 11130.7     | homo3      | n       |
| th          | 9710.8      | PROCESSING |         |
| ins         | 7           | lb         | 1.00    |
| ai          | 100.000     | wtfile     |         |
| cdc         | ph          | proc       | ft      |
|             |             | fn         | 131072  |
|             |             | math       | f       |
|             |             | werr       |         |
|             |             | wexp       |         |
|             |             | wls        |         |
|             |             | wnt        |         |

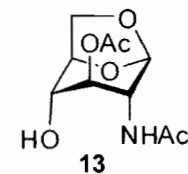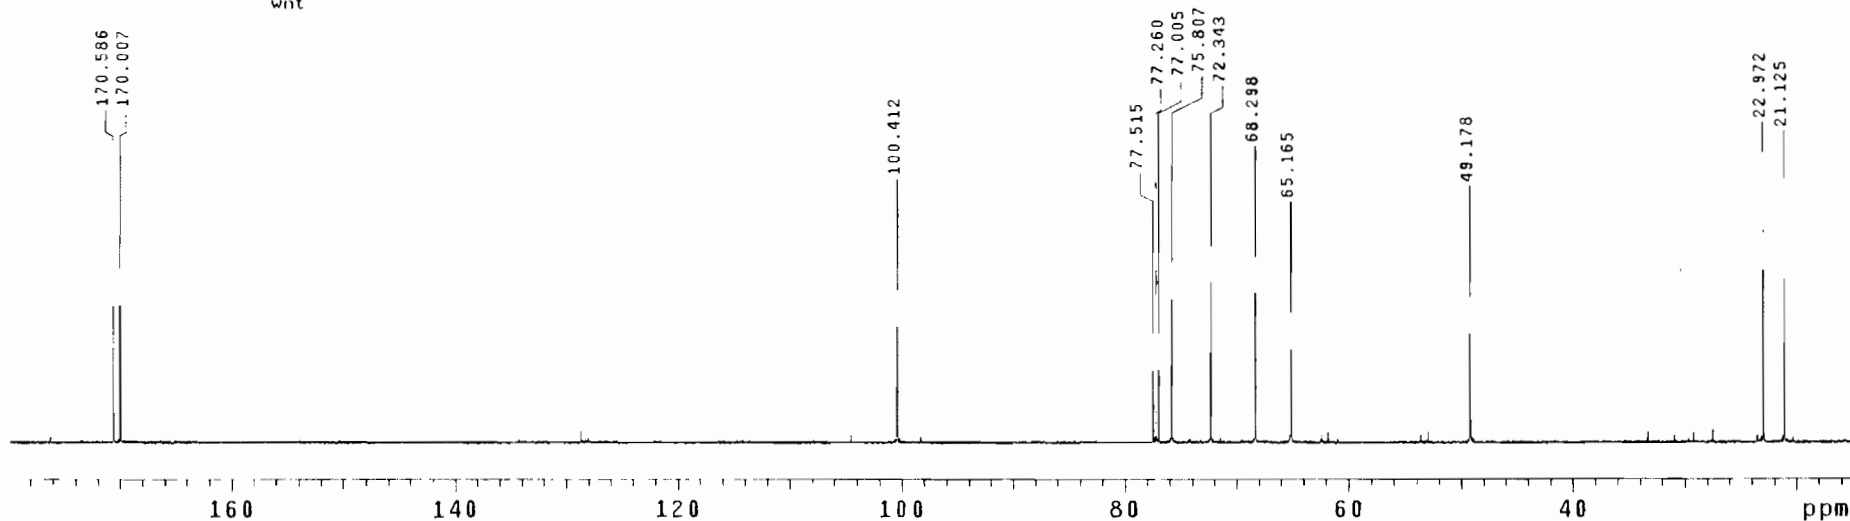

DHL-72

STANDARD PROTON PARAMETERS

Pulse Sequence: dept

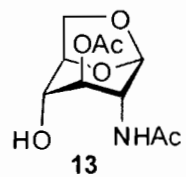

CH3 carbons

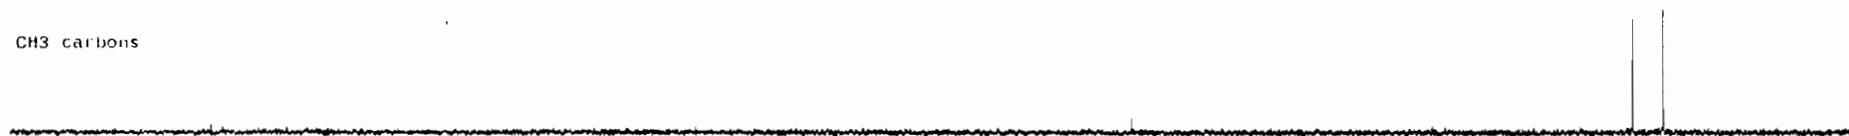

CH2 carbons

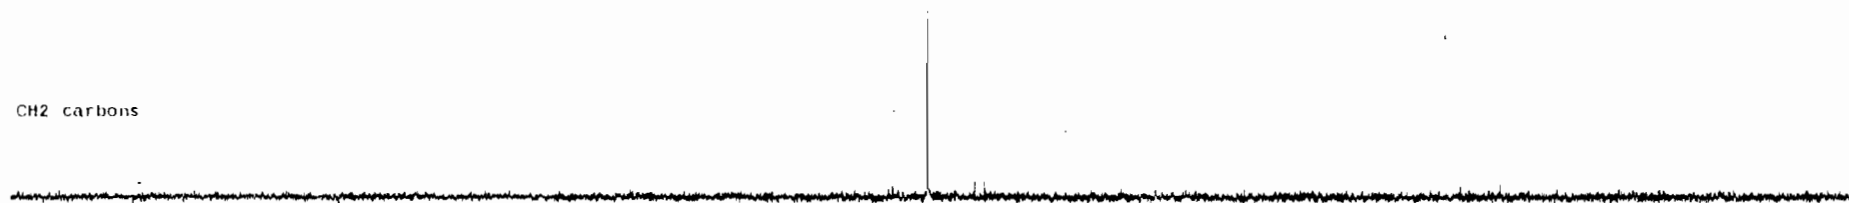

CH carbons

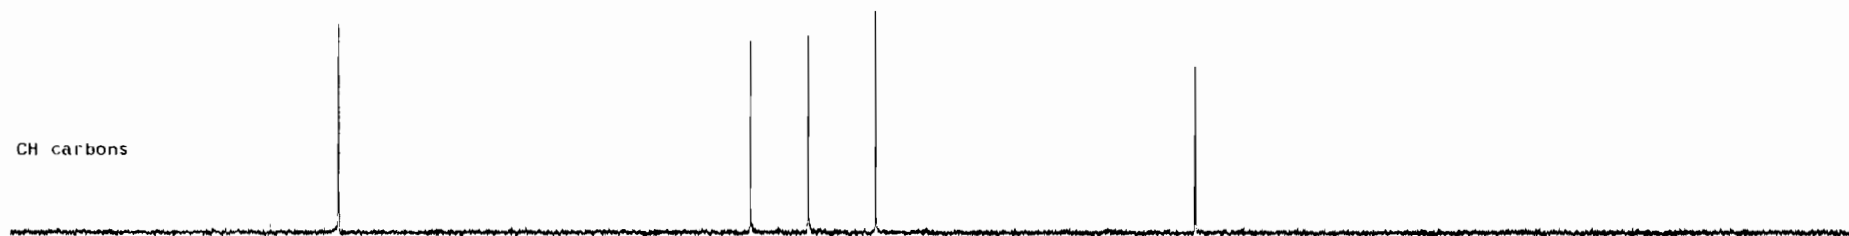

all protonated carbons

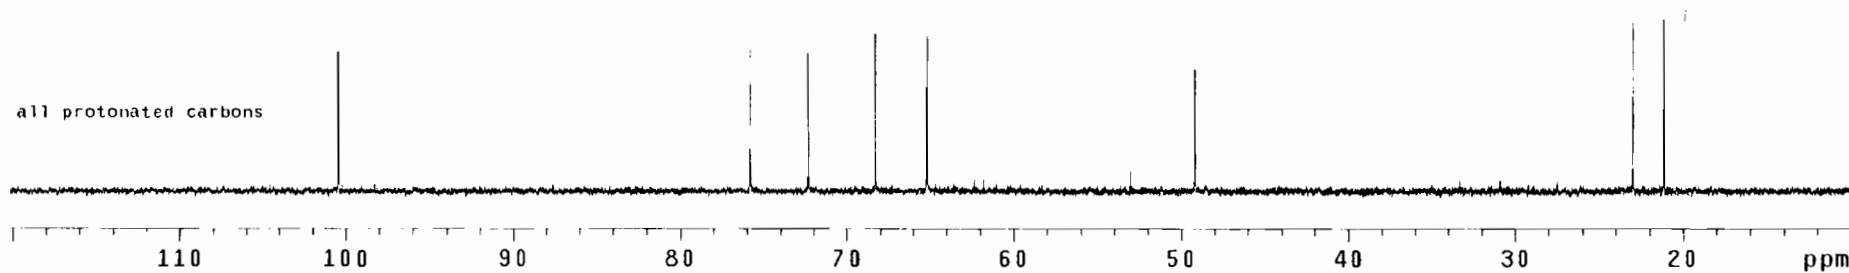

04L-7L

STANDARD PROTON PARAMETERS

Pulse Sequence: hetcor

Solvent: CDCl<sub>3</sub>

Ambient temperature

User: 1-14-87

INOVA-500 "nmr2a.chem.nd.edu"

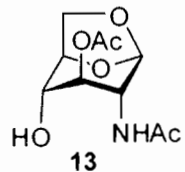

Relax. delay 1.500 sec

Acq. time 0.111 sec

Width 18403.5 Hz

2D Width 6533.3 Hz

4 repetitions

256 increments

OBSERVE C13, 125.6901841 MHz

DECOUPLE H1, 499.8639312 MHz

Power 40 dB

on during acquisition

off during delay

WALTZ-16 modulated

DATA PROCESSING

Line broadening 1.0 Hz

F1 DATA PROCESSING

Line broadening 0.3 Hz

FT size 4096 x 1024

Total time 28 min, 21 sec

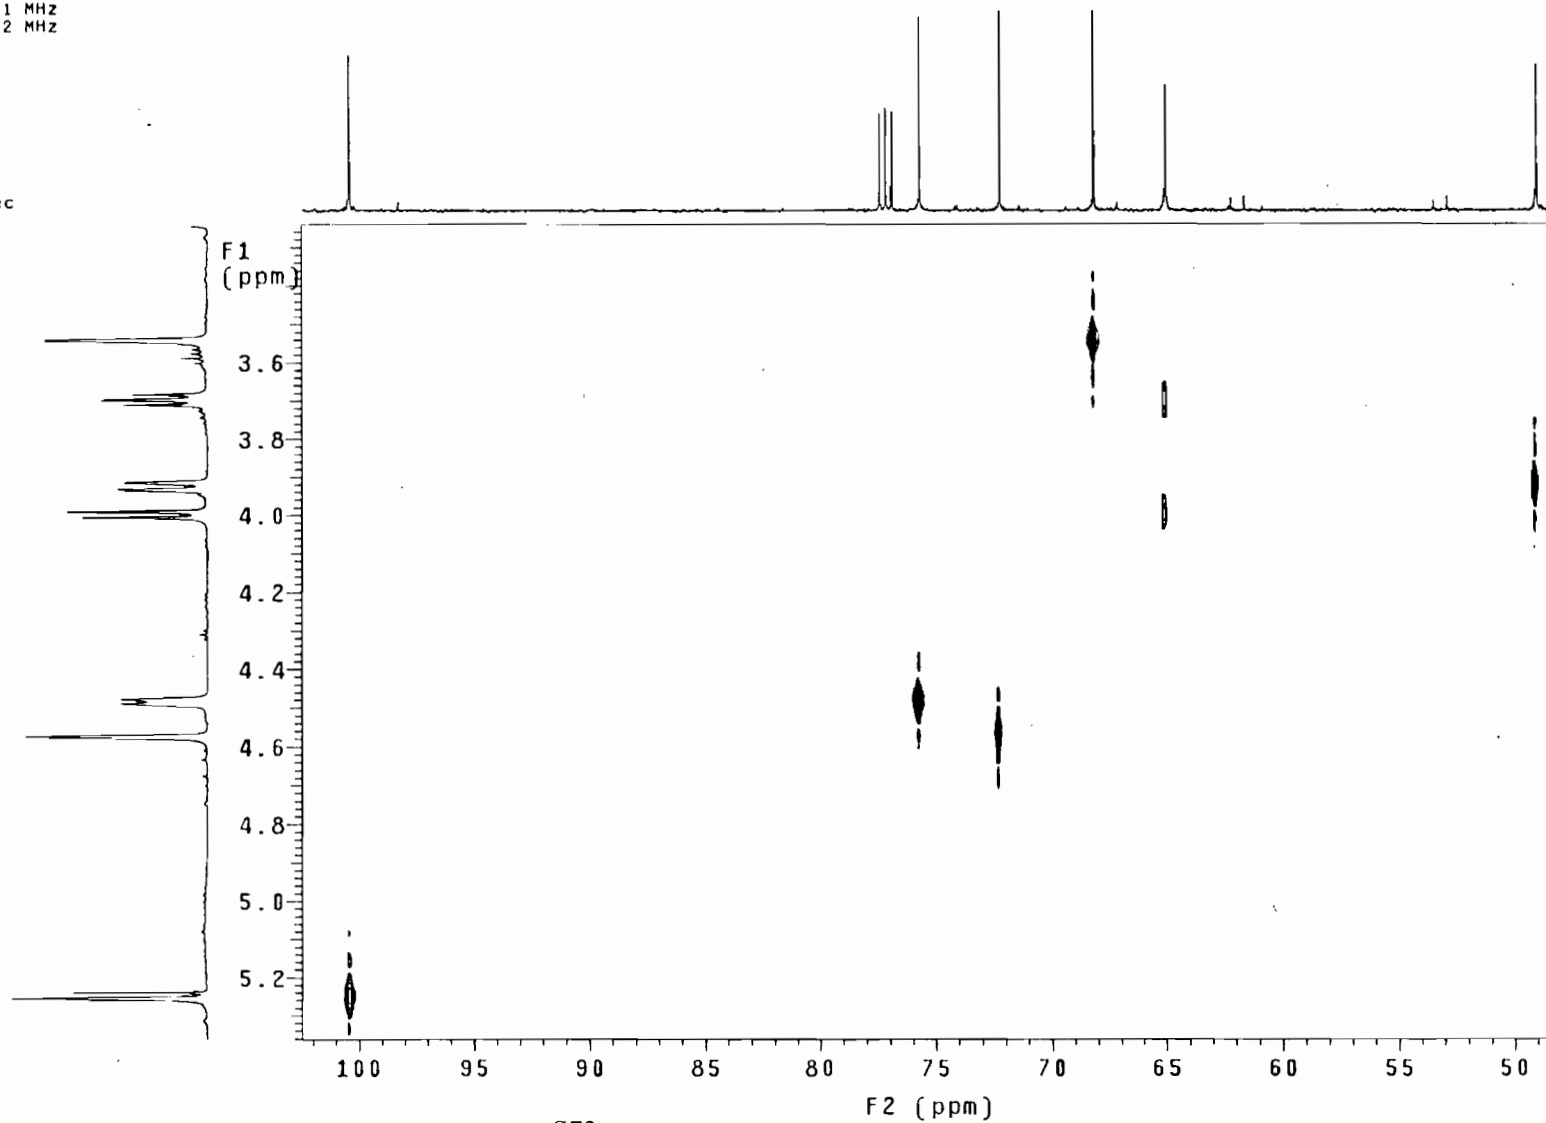

DHL-21

exp1 s2pu1

| SAMPLE      |             | DEC. & VT  |         |
|-------------|-------------|------------|---------|
| date        | Jan 27 2007 | dfrq       | 499.864 |
| solvent     | CDCl3       | dn         | H1      |
| file        | exp         | dpwr       | 30      |
| ACQUISITION |             | dof        | 0       |
| sfrq        | 499.864     | dm         | nnn     |
| tn          | H1          | dmm        | c       |
| at          | 5.016       | dmf        | 200     |
| np          | 65536       | dseq       |         |
| sw          | 6533.3      | dres       | 1.0     |
| fb          | 4000        | homo       | n       |
| bs          | 4           | DEC2       |         |
| tpwr        | 61          | dfrq2      | 0       |
| pw          | 13.5        | dn2        |         |
| d1          | 0.100       | dpwr2      | 1       |
| tof         | 269.9       | dof2       | 0       |
| nt          | 16          | dm2        | n       |
| ct          | 16          | dmm2       | c       |
| alock       | n           | dmf2       | 200     |
| gain        | not used    | dseq2      |         |
| FLAGS       |             | dres2      | 1.0     |
| il          | n           | homo2      | n       |
| in          | n           | DEC3       |         |
| dp          | y           | dfrq3      | 0       |
| hs          | nn          | dn3        |         |
| DISPLAY     |             | dpwr3      | 1       |
| sp          | 485.3       | dof3       | 0       |
| wp          | 5185.1      | dm3        | n       |
| vs          | 55          | dmm3       | c       |
| sc          | 0           | dmf3       | 200     |
| wc          | 250         | dseq3      |         |
| hzmm        | 20.74       | dres3      | 1.0     |
| is          | 100.00      | homo3      | n       |
| rf1         | 510.6       | PROCESSING |         |
| rfp         | 0           | wtfile     |         |
| th          | 7           | proc       | ft      |
| ins         | 5.000       | fn         | 65536   |
| ai          | ph          | math       | f       |

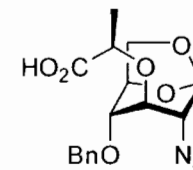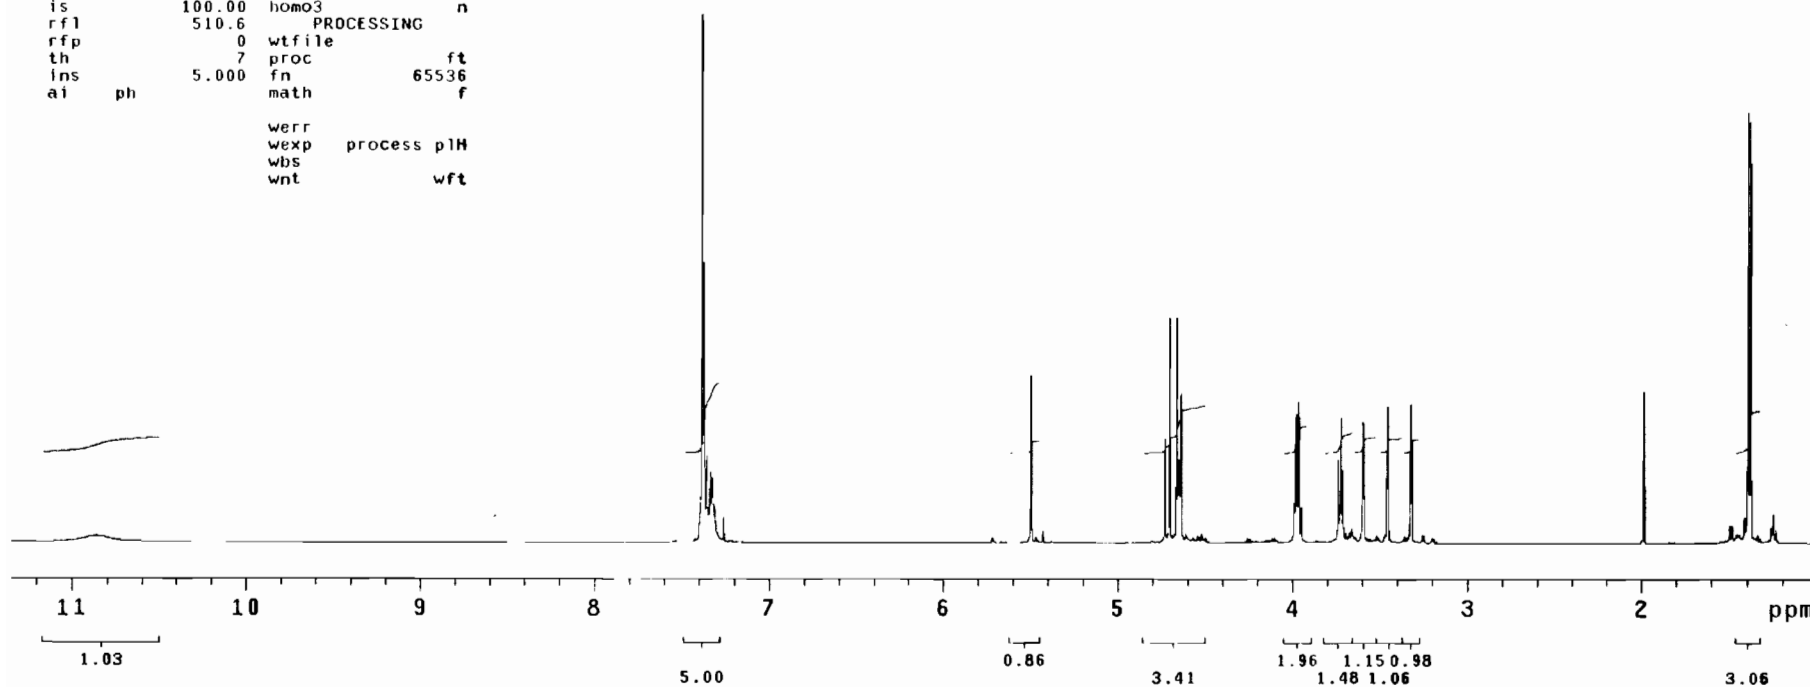

DHL-21

Pulse Sequence: relayh

Solvent: CDCl<sub>3</sub>

Ambient temperature

User: 1-14-87

INOVA-500 "inova5"

Relax. delay 1.300 sec

COSY 90-90

Acq. time 0.157 sec

Width 3262.2 Hz

2D Width 3262.2 Hz

8 repetitions

256 increments

OBSERVE H1, 499.8611751 MHz

DATA PROCESSING

Sine bell 0.078 sec

F1 DATA PROCESSING

Sine bell 0.039 sec

F1 size 1024 x 1024

Total time 51 min, 36 sec

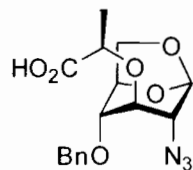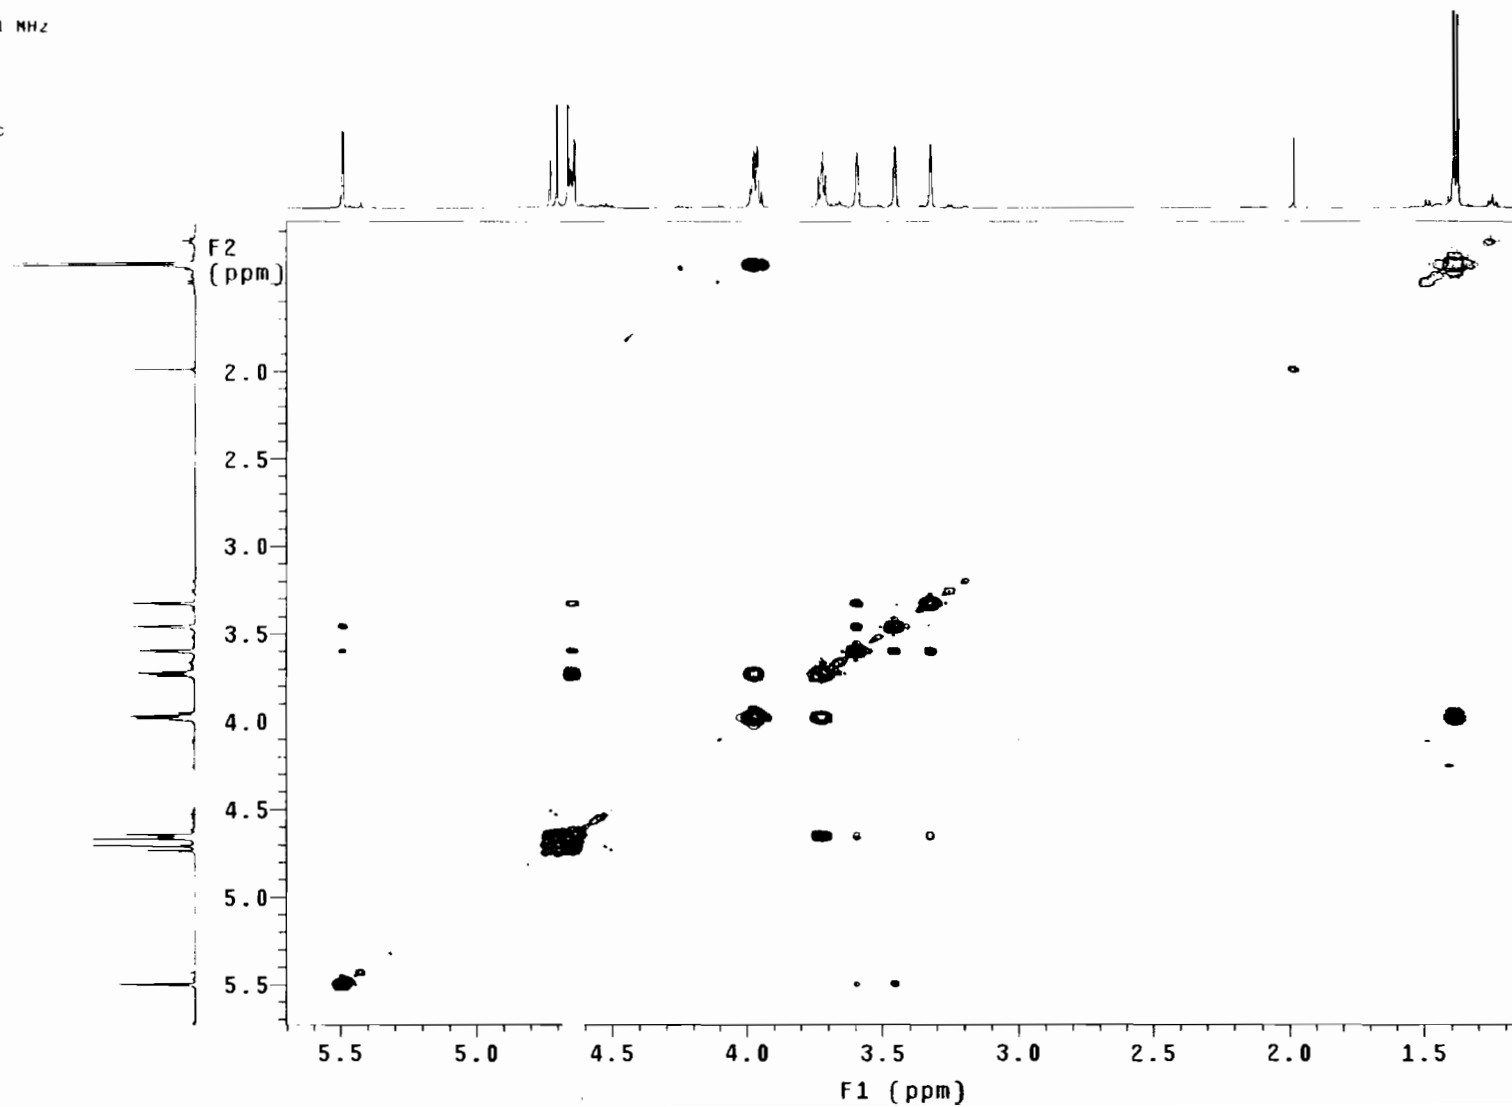

DHL-21

Pulse Sequence: relayh

Solvent: CDC13

Ambient temperature

User: 1-14-87

INOVA-500 "inova5"

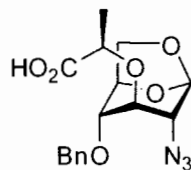

Relax. delay 1.300 sec

COSY 90-90

Acq. time 0.157 sec

Width 3262.2 Hz

2D Width 3262.2 Hz

8 repetitions

256 increments

OBSERVE H1, 499.8611751 MHz

DATA PROCESSING

Sine bell 0.0/8 sec

F1 DATA PROCESSING

Sine bell 0.039 sec

FT size 1024 x 1024

Total time 51 min, 36 sec

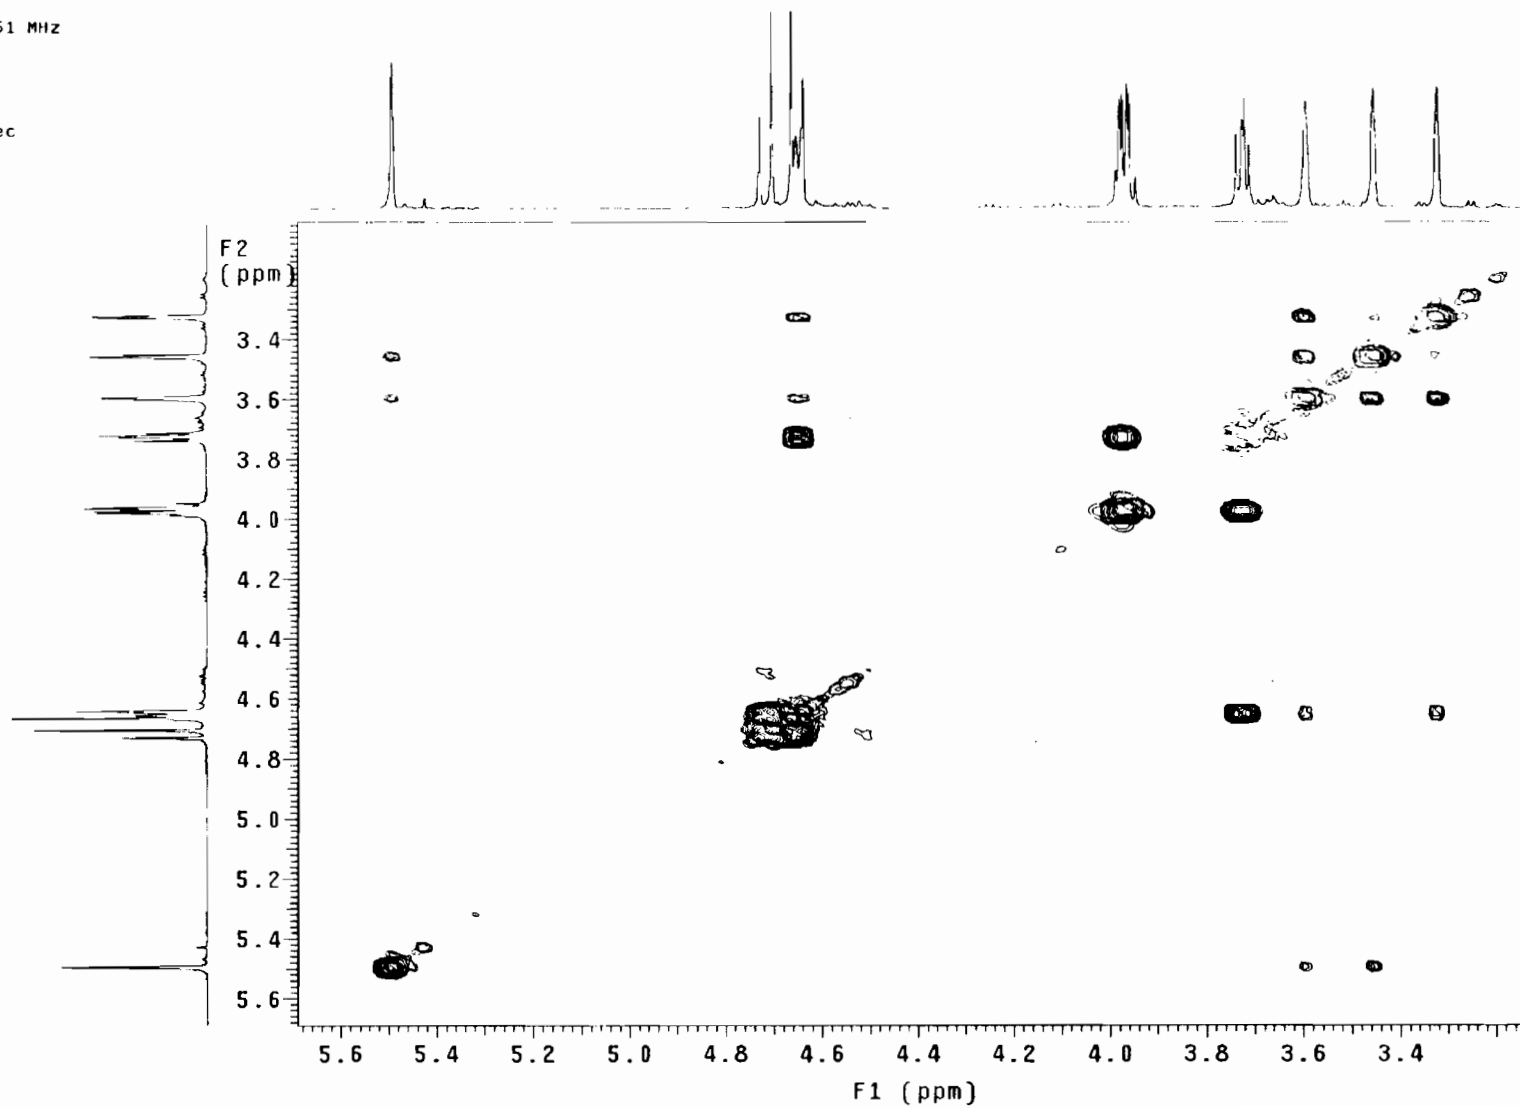

DHL-21

exp3 s2pu1

| SAMPLE      |             | DEC. & VT  |         |
|-------------|-------------|------------|---------|
| date        | Jan 27 2007 | dfrq       | 499.864 |
| solvent     | CDC13       | dn         | H1      |
| file        | exp         | dpwr       | 40      |
| ACQUISITION |             | dof        | 0       |
| sfrq        | 125.702     | dm         | YYY     |
| tn          | C13         | dmm        | W       |
| at          | 1.215       | dmf        | 8787.35 |
| np          | 65536       | dseq       |         |
| sw          | 26963.3     | dres       | 1.0     |
| fb          | 15000       | homo       | n       |
| bs          | 4           | DEC2       |         |
| tpwr        | 52          | dfrq2      | 0       |
| pw          | 10.2        | dn2        |         |
| d1          | 1.800       | dpwr2      | 1       |
| tof         | 144.5       | dof2       | 0       |
| nt          | 640         | dm2        | n       |
| ct          | 78          | dmm2       | c       |
| alock       | n           | dmf2       | 10000   |
| gain        | not used    | dseq2      |         |
| FLAGS       |             | dres2      | 1.0     |
| il          | n           | homo2      | n       |
| in          | n           | DEC3       |         |
| dp          | y           | dfrq3      | 0       |
| hs          | nn          | dn3        |         |
| DISPLAY     |             | dpwr3      | 1       |
| sp          | 1922.3      | dof3       | 0       |
| wp          | 20656.1     | dm3        | n       |
| vs          | 69          | dmm3       | c       |
| sc          | 0           | dmf3       | 10000   |
| wc          | 250         | dseq3      |         |
| hzmm        | 82.62       | dres3      | 1.0     |
| is          | 500.00      | homo3      | n       |
| rfl         | 11121.3     | PROCESSING |         |
| rfp         | 9678.1      | lb         | 1.00    |
| th          | 5           | wtfile     |         |
| ins         | 100.000     | proc       | ft      |
| ai          | cdc ph      | fn         | 131072  |
|             |             | math       | f       |

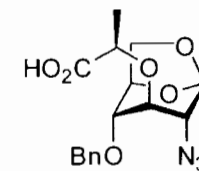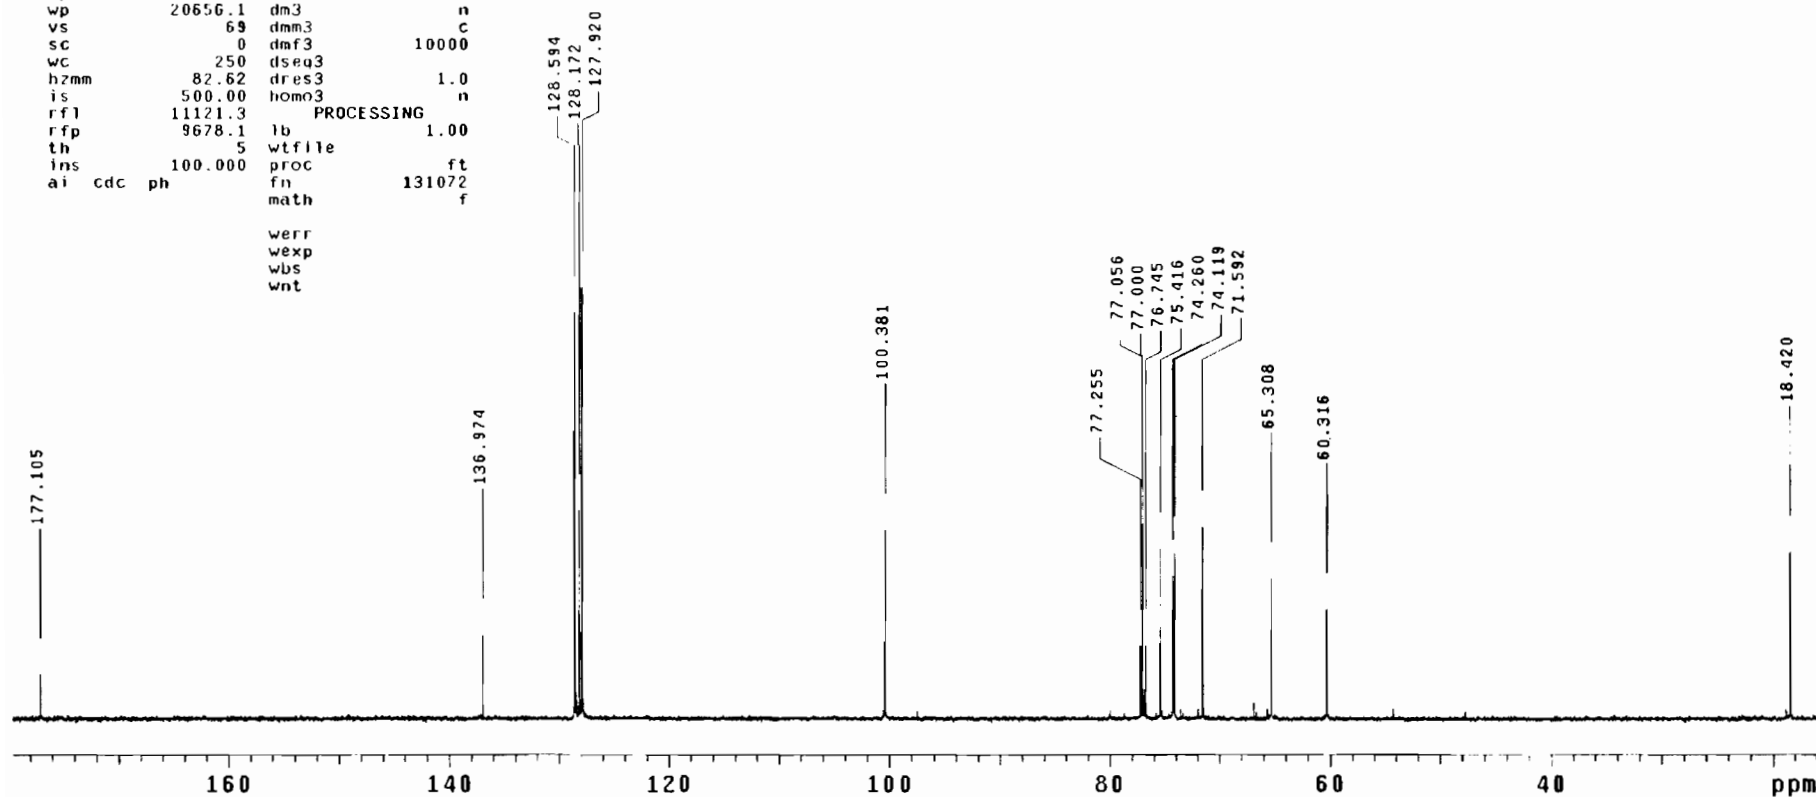

DHL-21

Pulse Sequence: dept

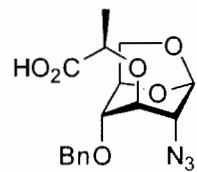

CH<sub>3</sub> carbons

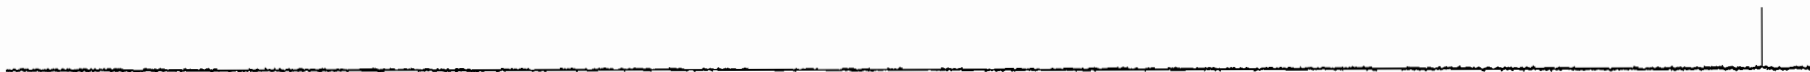

CH<sub>2</sub> carbons

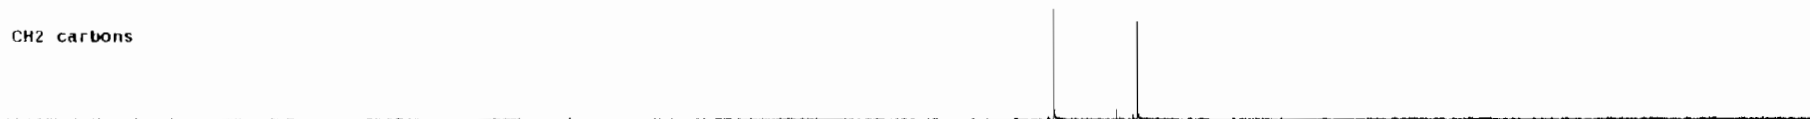

CH carbons

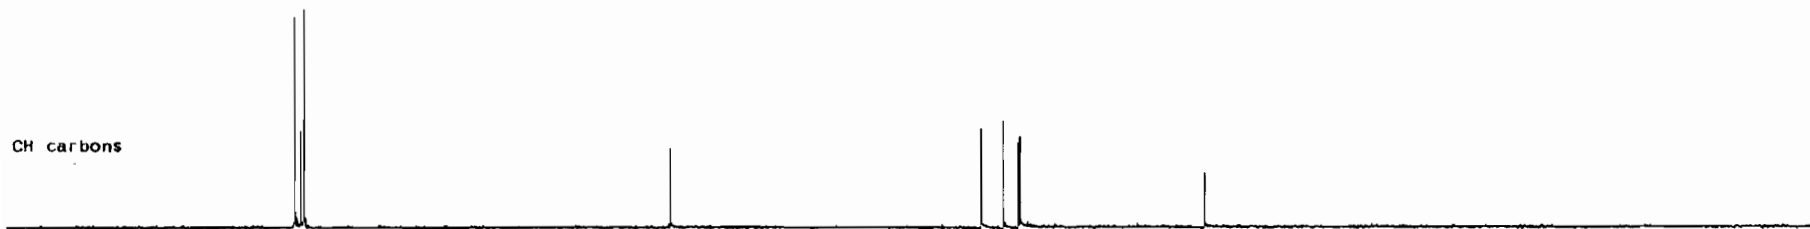

all protonated carbons

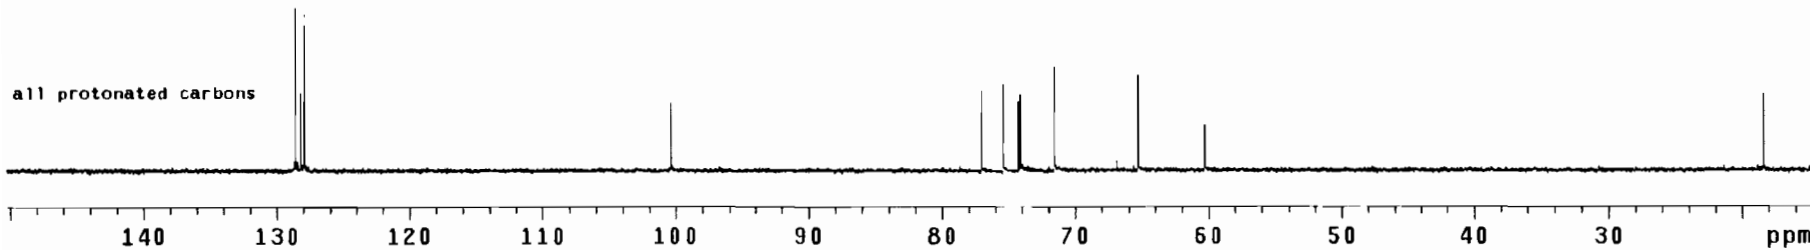

DHL-21

Pulse Sequence: hetcor

Solvent: CDCl<sub>3</sub>

Ambient temperature

User: 1-14-87

INOVA-500 "inova5"

Relax. delay 1.500 sec

Acq. time 0.111 sec

Width 18403.5 Hz

2D Width 3331.8 Hz

4 repetitions

256 increments

OBSERVE C13, 125.6902072 MHz

DECOUPLE H1, 499.8634009 MHz

Power 40 dB

on during acquisition

off during delay

WALTZ-16 modulated

DATA PROCESSING

Line broadening 1.0 Hz

F1 DATA PROCESSING

Line broadening 0.3 Hz

F1 size 4096 x 512

Total time 28 min, 40 sec

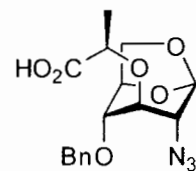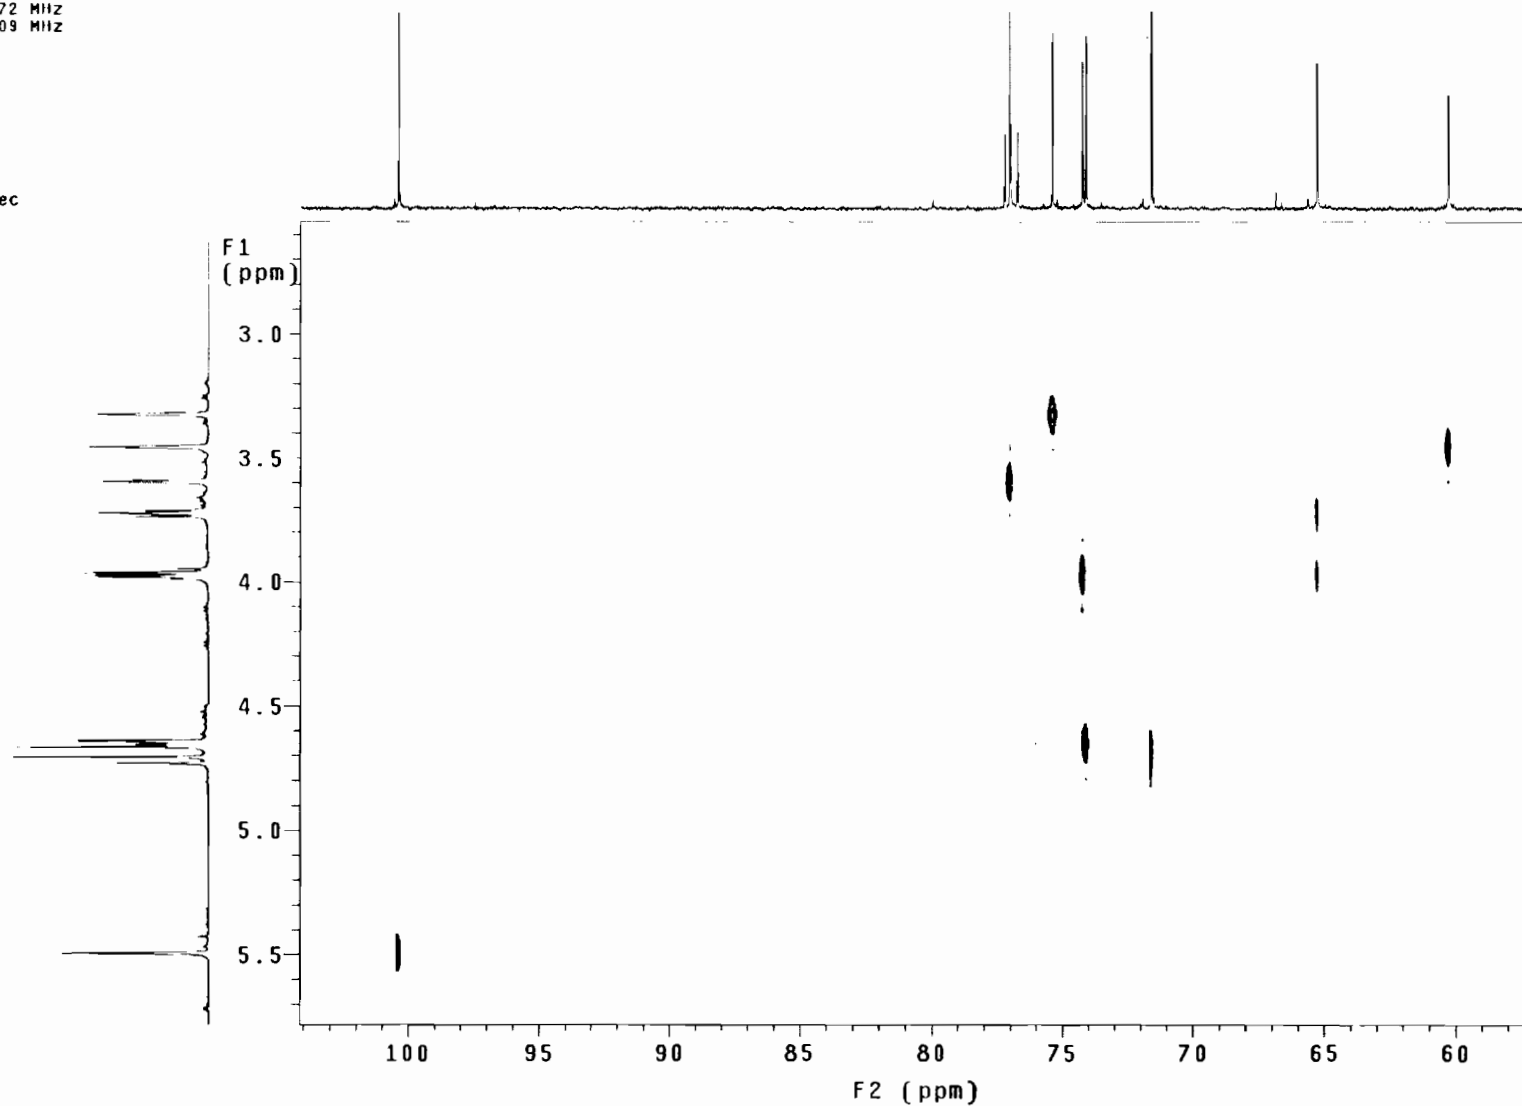

DHL-24

exp1 s2pu1

| SAMPLE      |             | DEC. & VT  |         |
|-------------|-------------|------------|---------|
| date        | Jan 28 2007 | dfrq       | 499.866 |
| solvent     | CD30D       | dn         | H1      |
| file        | exp         | dpwr       | 30      |
| ACQUISITION |             |            |         |
| sfrq        | 499.866     | dm         | nnn     |
| tn          | H1          | dmm        | c       |
| at          | 5.016       | dmf        | 200     |
| np          | 65536       | dseq       |         |
| sw          | 6533.3      | dres       | 1.0     |
| fb          | 4000        | homo       | n       |
| bs          | 4           | DEC2       |         |
| tpwr        | 61          | dfrq2      | 0       |
| pw          | 13.5        | dn2        |         |
| d1          | 0.100       | dpwr2      | 1       |
| tof         | 269.9       | dof2       | 0       |
| nt          | 16          | dm2        | n       |
| ct          | 16          | dmm2       | c       |
| alock       | n           | dmf2       | 200     |
| gain        | not used    | dseq2      |         |
| FLAGS       |             | dres2      | 1.0     |
| fl          | n           | homo2      | n       |
| ln          | n           | DEC3       |         |
| dp          | y           | dfrq3      | 0       |
| hs          | nn          | dn3        |         |
| DISPLAY     |             | dpwr3      | 1       |
| sp          | 567.1       | dof3       | 0       |
| wp          | 4232.4      | dm3        | n       |
| vs          | 80          | dmm3       | c       |
| sc          | 0           | dmf3       | 200     |
| wc          | 250         | dseq3      |         |
| hzmm        | 16.93       | dres3      | 1.0     |
| is          | 100.00      | homo3      | n       |
| rfl         | 497.4       | PROCESSING |         |
| rfp         | 0           | wtfile     | ft      |
| th          | 7           | proc       |         |
| ins         | 1.000       | fn         | 65536   |
| ai          | ph          | math       | f       |

werr  
wexp process pH  
wbs  
wnt wft

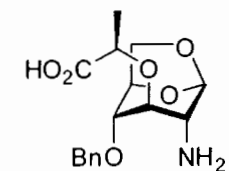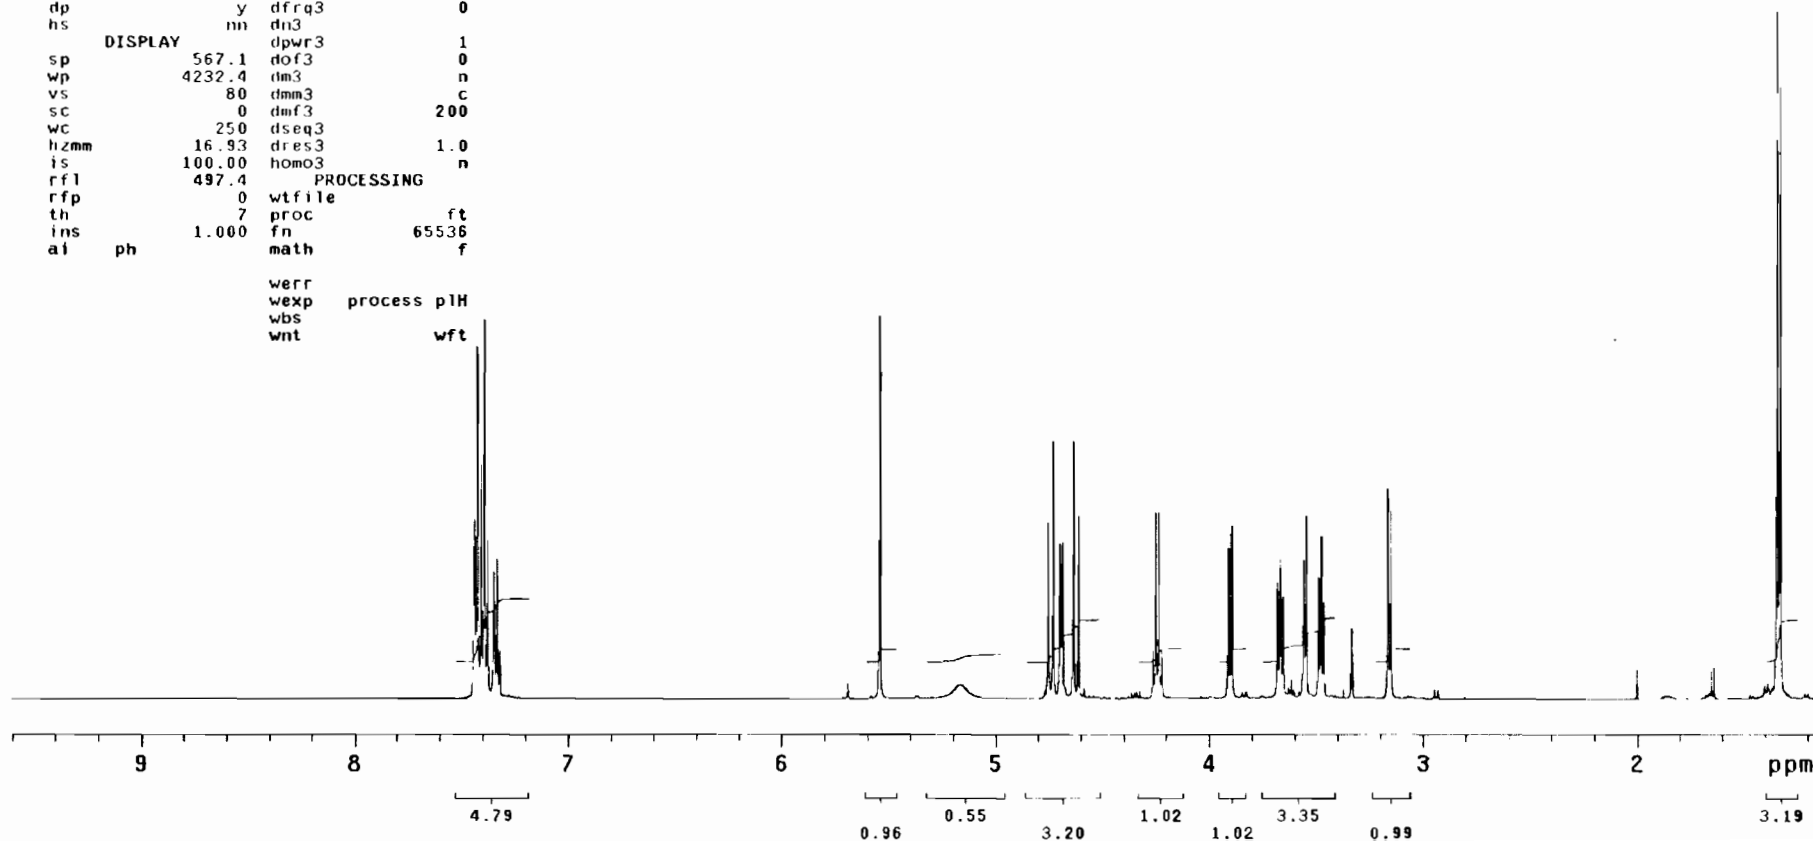

DHL-24

Pulse Sequence: relayh

Solvent: CD3OD

Ambient temperature

INOVA-500 "inova5"

Relax. delay 1.300 sec

COSY 90-90

Acq. time 0.159 sec

Width 3219.4 Hz

2D Width 3219.4 Hz

4 repetitions

256 increments

OBSERVE H1, 499.8631314 MHz

DATA PROCESSING

Sine bell 0.080 sec

F1 DATA PROCESSING

Sine bell 0.040 sec

FI size 1024 x 1024

Total time 25 min, 56 sec

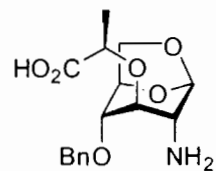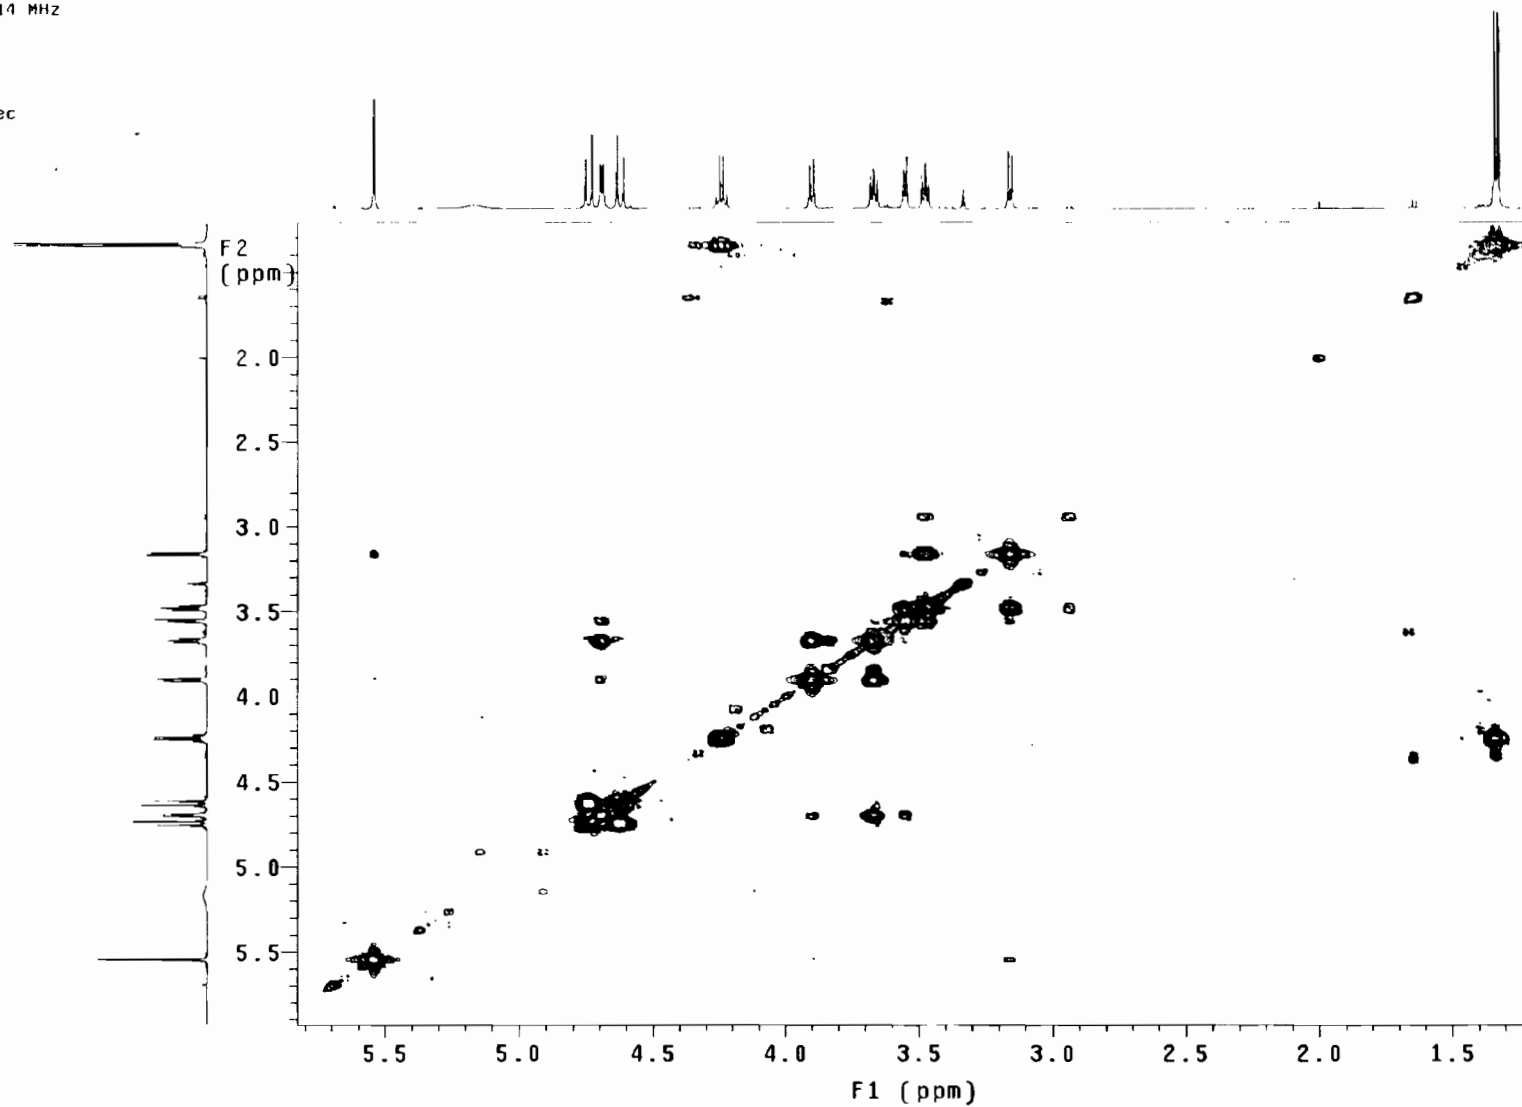

DHL-24

Pulse Sequence: relayh

Solvent: CD3OD

Ambient temperature

INOVA-500 "inova5"

Relax. delay 1.300 sec

COSY 90-90

Acq. time 0.159 sec

Width 3219.4 Hz

2D Width 3219.4 Hz

4 repetitions

256 increments

OBSERVE H1, 499.8631314 MHz

DATA PROCESSING

Sine bell 0.080 sec

F1 DATA PROCESSING

Sine bell 0.040 sec

FT size 1024 x 1024

total time 25 min, 56 sec

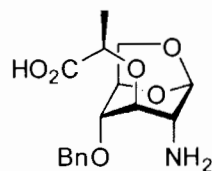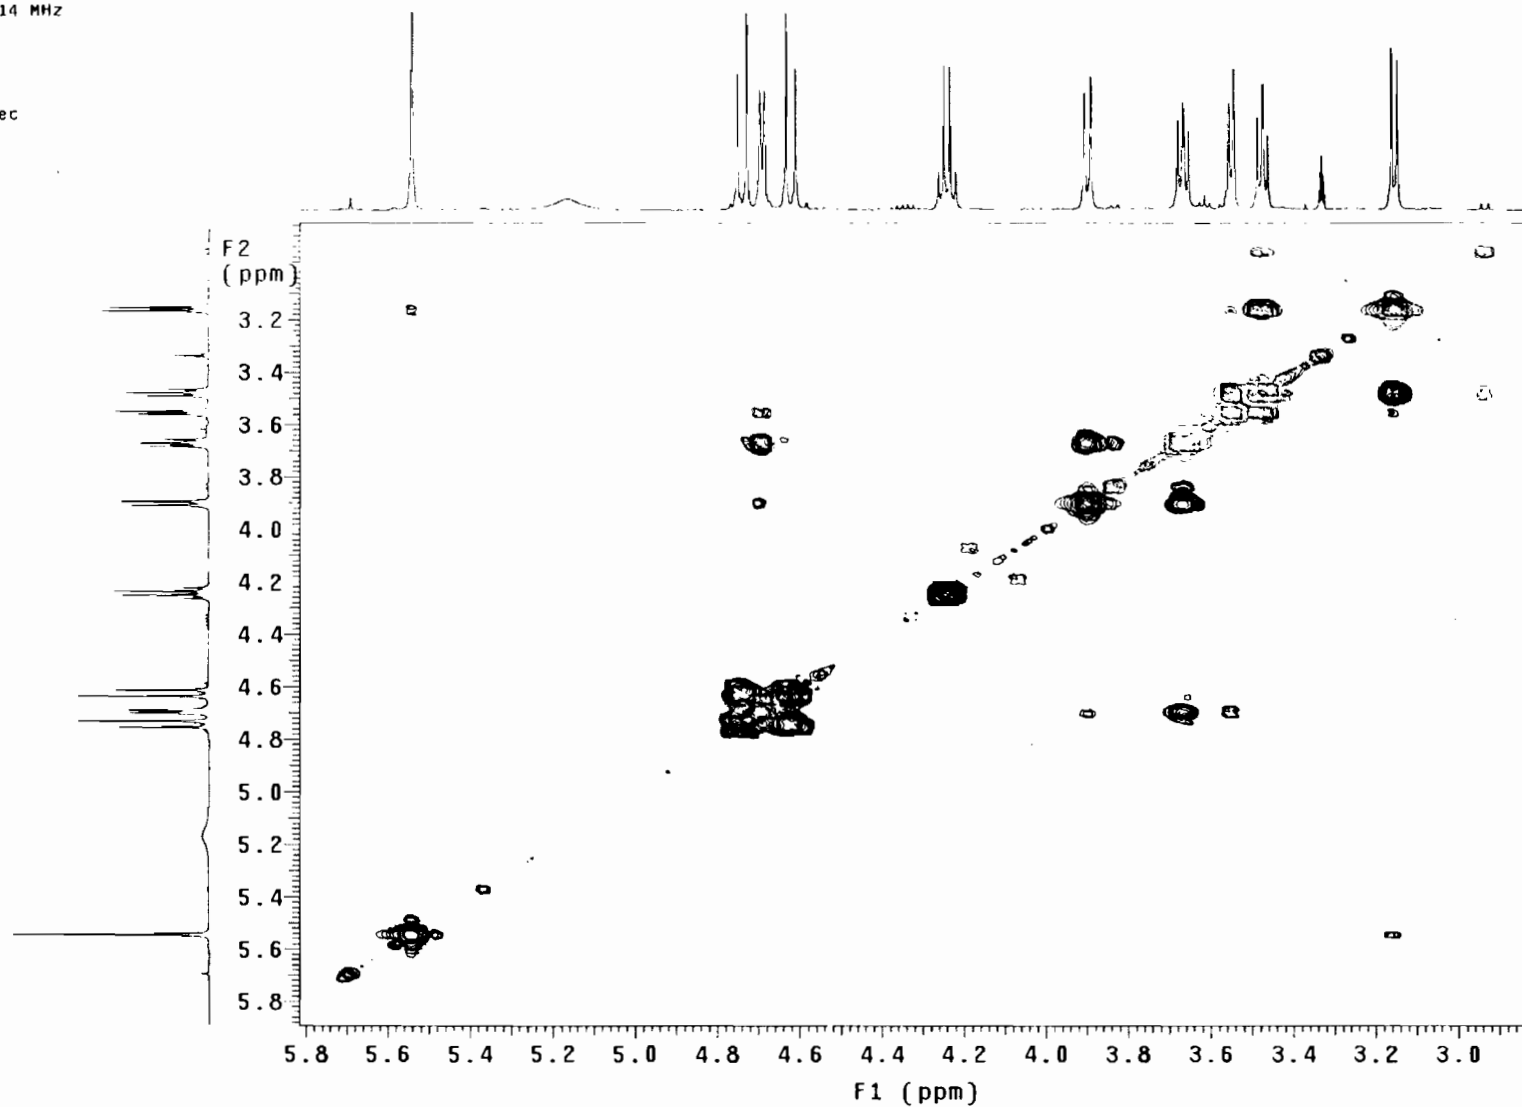

DHL-24

exp2 s2pu1

| SAMPLE      |             | DEC. & VT  |         |
|-------------|-------------|------------|---------|
| date        | Jan 28 2007 | dfrq       | 499.866 |
| solvent     | cd3od       | dn         | H1      |
| file        | exp         | dpwr       | 40      |
| ACQUISITION |             | dof        | 0       |
| sfrq        | 125.703     | dm         | yyy     |
| tn          | C13         | dmm        | w       |
| at          | 1.215       | dmf        | 8787.35 |
| np          | 65536       | dseq       |         |
| sw          | 26963.3     | dres       | 1.0     |
| fb          | 15000       | homo       | n       |
| bs          | 4           | DFC2       |         |
| tpwr        | 52          | dfrq2      | 0       |
| pw          | 10.2        | dn2        |         |
| dl          | 1.800       | dpwr2      | 1       |
| tof         | 144.5       | dof2       | 0       |
| nt          | 1200        | dm2        | n       |
| ct          | 56          | dmm2       | c       |
| alock       | n           | dmf2       | 10000   |
| gain        | not used    | dseq2      |         |
| FLAGS       |             | dres2      | 1.0     |
| il          | n           | homo2      | n       |
| in          | n           | DFC3       |         |
| dp          | y           | dfrq3      | 0       |
| hs          | nn          | dn3        |         |
| DISPLAY     |             | dpwr3      | 1       |
| sp          | 1240.2      | dof3       | 0       |
| wp          | 22640.4     | dm3        | n       |
| vs          | 61          | dmm3       | c       |
| sc          | 0           | dmf3       | 10000   |
| wc          | 250         | dseq3      |         |
| hzmm        | 90.56       | dres3      | 1.0     |
| ls          | 500.00      | homo3      | n       |
| rfl         | 7417.6      | PROCESSING |         |
| rfp         | 6177.7      | lb         | 1.00    |
| th          | 6           | wtfile     |         |
| ins         | 100.000     | proc       | ft      |
| ai          | cdc ph      | fn         | 131072  |
|             |             | math       | f       |

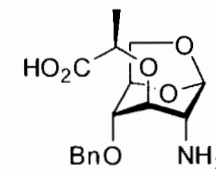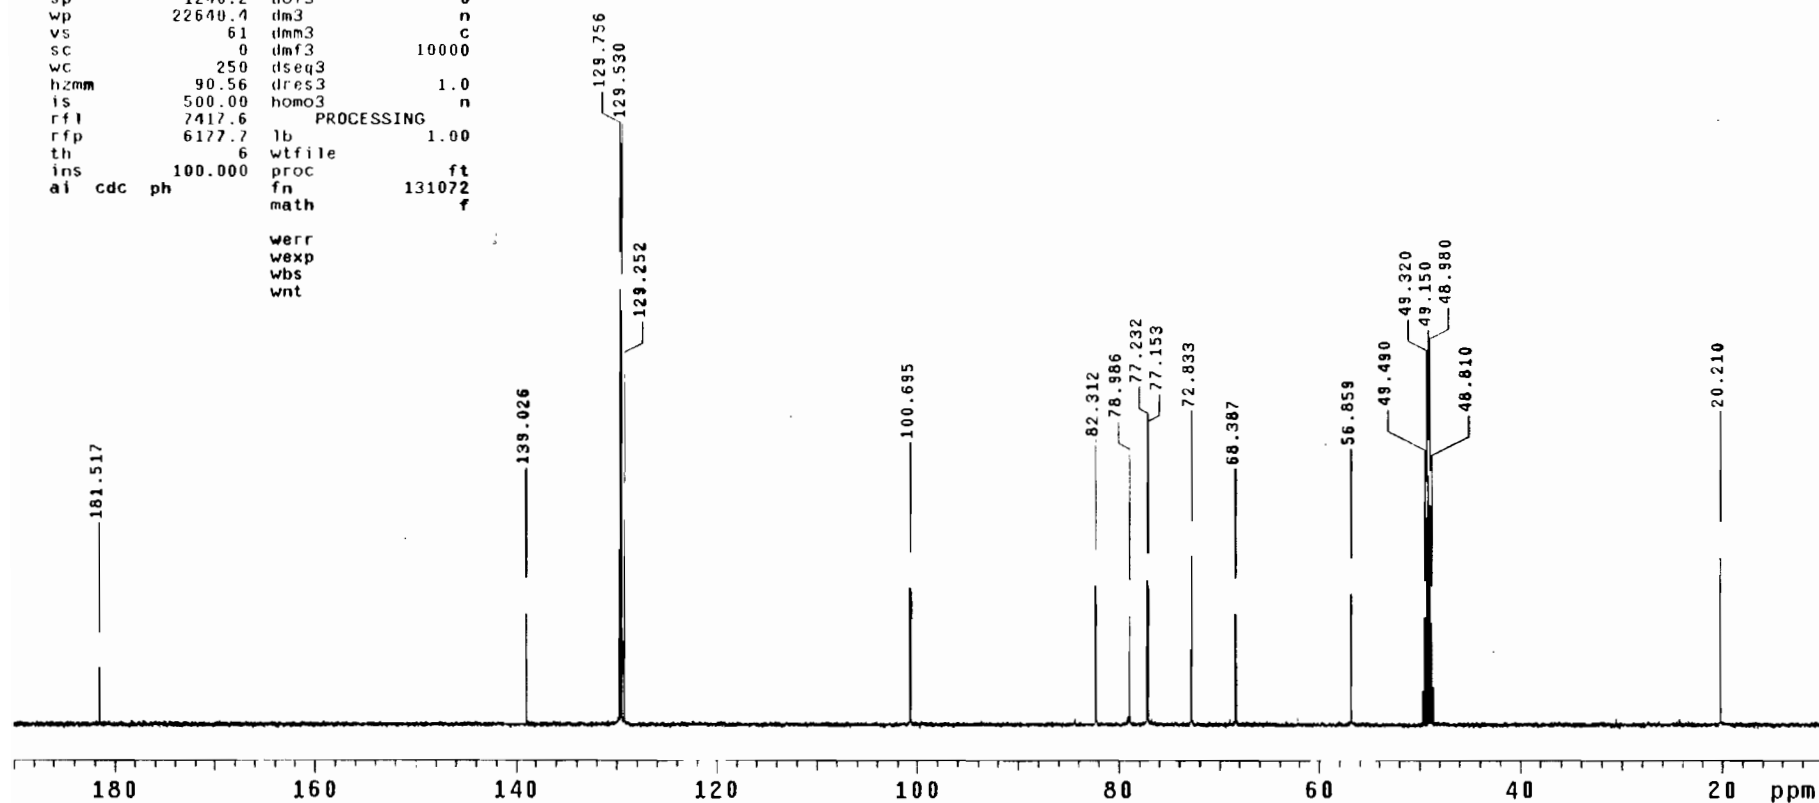

DHL-24

Pulse Sequence: dept

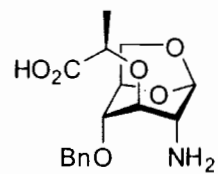

CH3 carbons

CH2 carbons

CH carbons

all protonated carbons

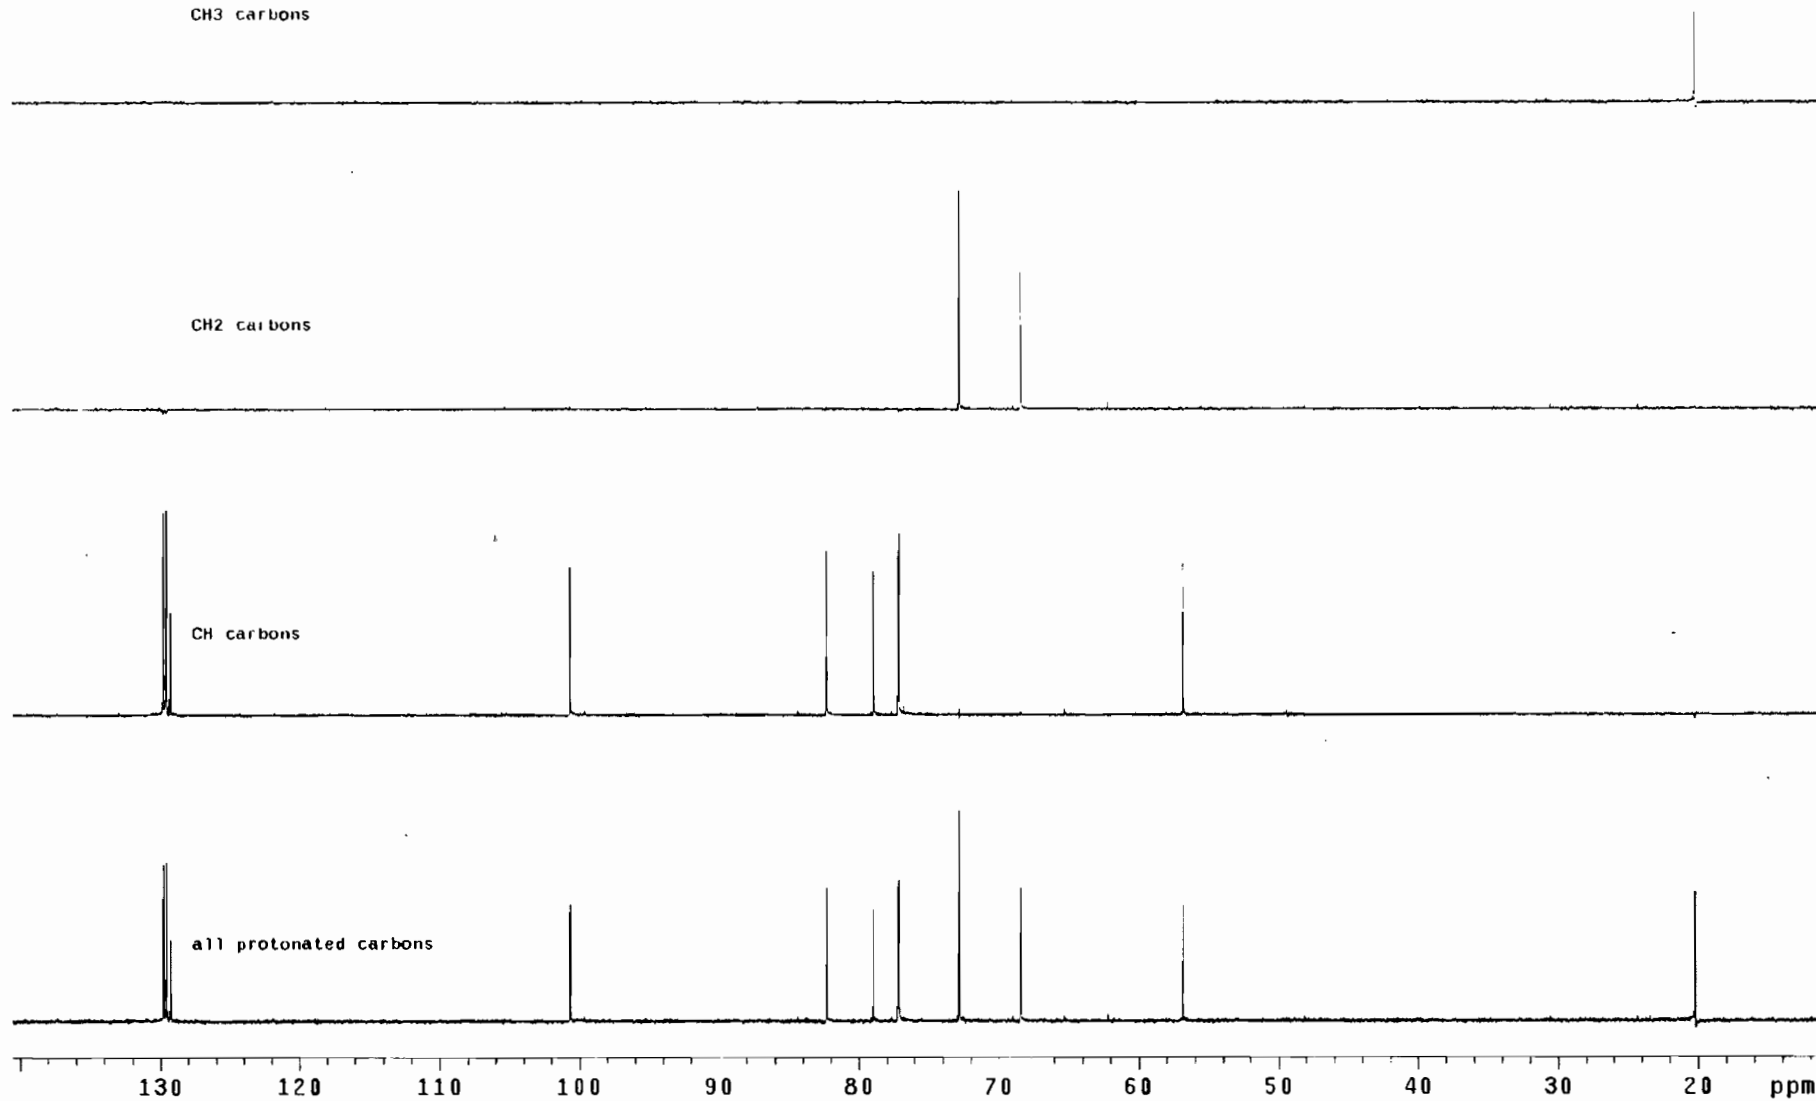

DHL-24

Pulse Sequence: hetcor

Solvent: cd3od

Ambient temperature

User: 1-14-87

INOVA-500 "inova5"

Relax. delay 1.500 sec

Acq. time 0.111 sec

Width 18403.5 Hz

2D Width 3236.6 Hz

4 repetitions

256 increments

OBSERVE C13, 125.6904993 MHz

DECOUPLE H1, 499.8653167 MHz

Power 40 dB

on during acquisition

off during delay

WALTZ-16 modulated

DATA PROCESSING

Line broadening 1.0 Hz

F1 DATA PROCESSING

Line broadening 0.3 Hz

FT size 4096 x 512

Total time 28 min, 41 sec

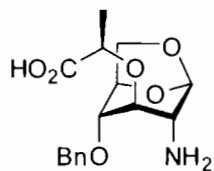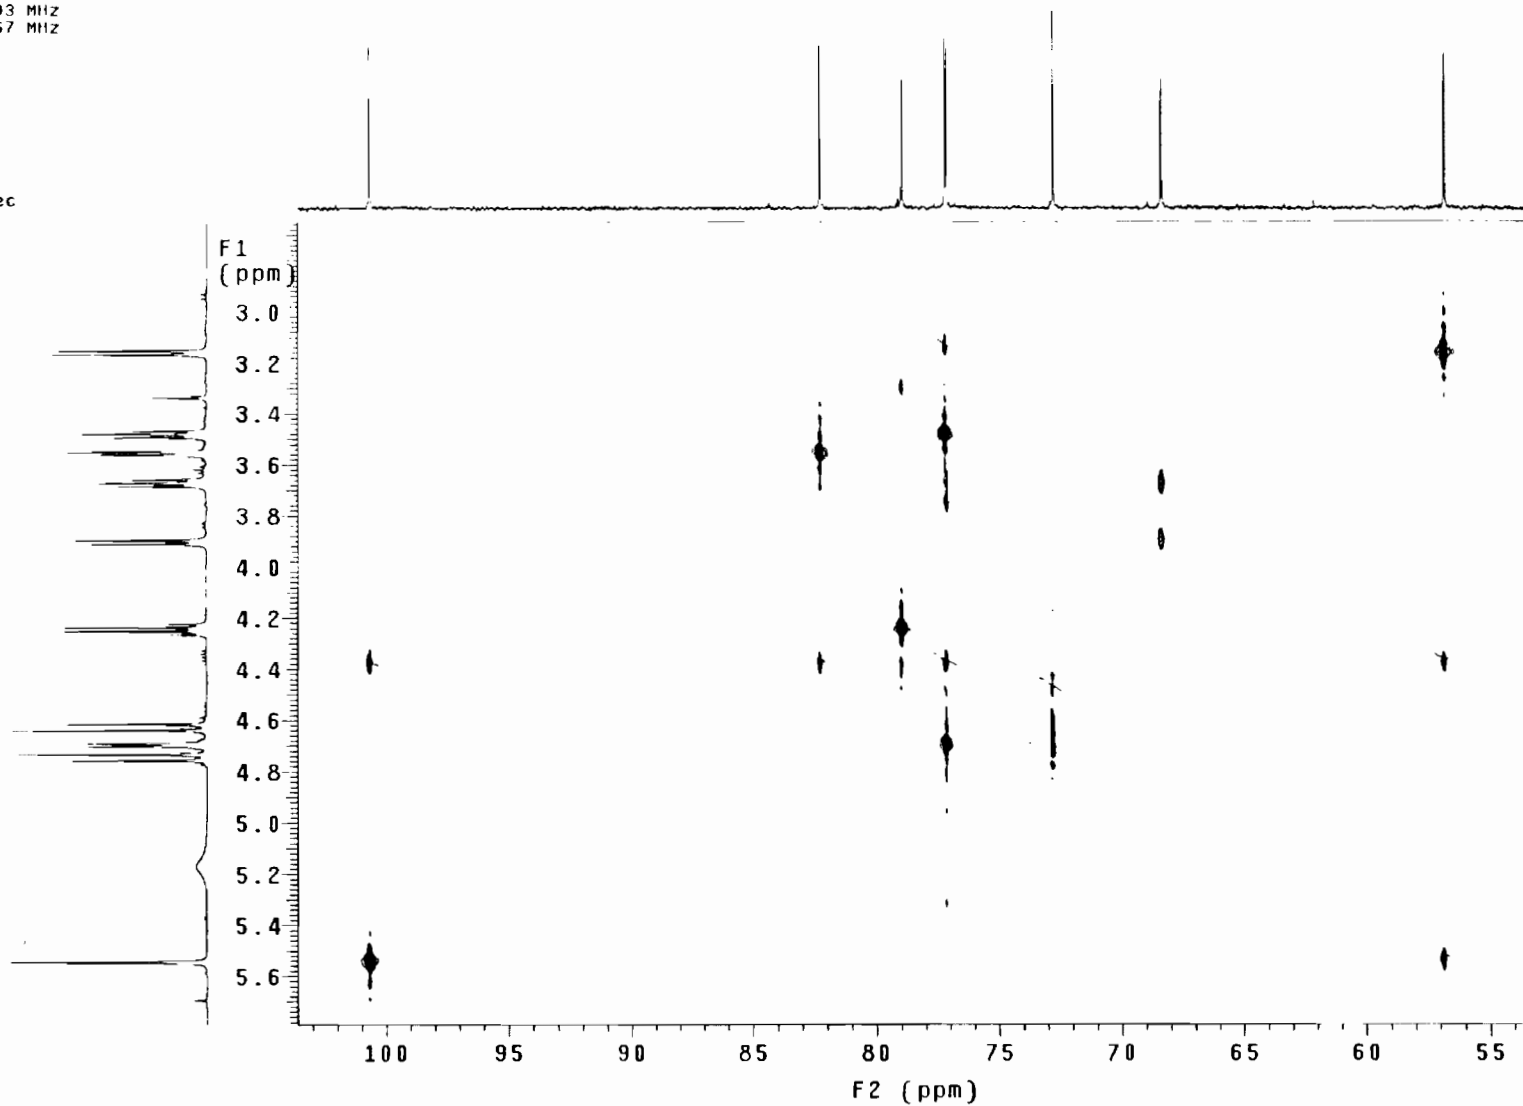

DHL-26-2

exp2 s2pu1

| SAMPLE      |             | DEC. & VT  |            |
|-------------|-------------|------------|------------|
| date        | Jan 31 2007 | dfrq       | 299.948    |
| solvent     | CDC13       | dn         | H1         |
| file        | exp         | dpwr       | 30         |
| ACQUISITION |             |            |            |
| sfrq        | 299.949     | dm         | nnn        |
| tn          | H1          | dmm        | c          |
| at          | 3.620       | dmf        | 200        |
| np          | 32768       | dseq       |            |
| sw          | 4525.4      | dres       | 1.0        |
| fb          | 2600        | homo       | n          |
| bs          | 4           | PROCESSING |            |
| tpwr        | 59          | wtfile     |            |
| pw          | 14.0        | proc       | ft         |
| d1          | 0.380       | fn         | 65536      |
| tof         | 481.6       | math       | f          |
| nt          | 16          |            |            |
| ct          | 16          | werr       |            |
| alock       | n           | wexp       | process pH |
| gain        | not used    | wbs        |            |
|             | FLAGS       | wnt        |            |
| il          | n           |            |            |
| in          | n           |            |            |
| dp          | y           |            |            |
| hs          | nn          |            |            |
| DISPLAY     |             |            |            |
| sp          | 319.2       |            |            |
| wp          | 3324.1      |            |            |
| vs          | 151         |            |            |
| sc          | 0           |            |            |
| wc          | 250         |            |            |
| hzmm        | 13.30       |            |            |
| is          | 125.39      |            |            |
| rfl         | 281.3       |            |            |
| rfp         | 0           |            |            |
| th          | 62          |            |            |
| ins         | 1.000       |            |            |
| nm          | cdc ph      |            |            |

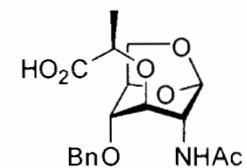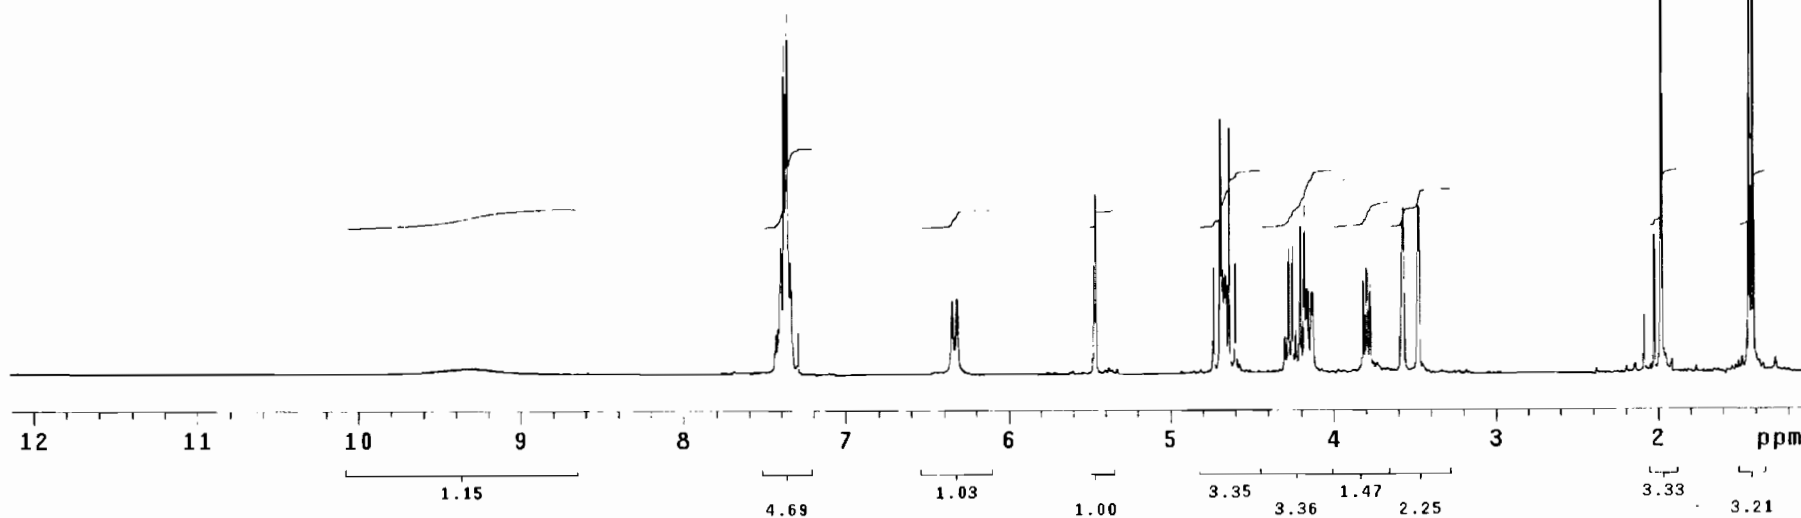

DHL-26-2

Pulse Sequence: relayh

Solvent: CDCl<sub>3</sub>

Ambient temperature

UNITYplus-300 "nmr3a.chem.nd.edu"

Relax. delay 1.400 sec

COSY 90-90

Acq. time 0.125 sec

Width 2045.6 Hz

2D Width 2045.6 Hz

4 repetitions

128 increments

OBSERVE H1, 299.9468517 MHz

DATA PROCESSING

Sine bell 0.063 sec

F1 DATA PROCESSING

Sine bell 0.063 sec

FT size 2048 x 1024

Total time 13 min, 29 sec

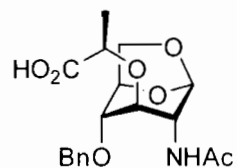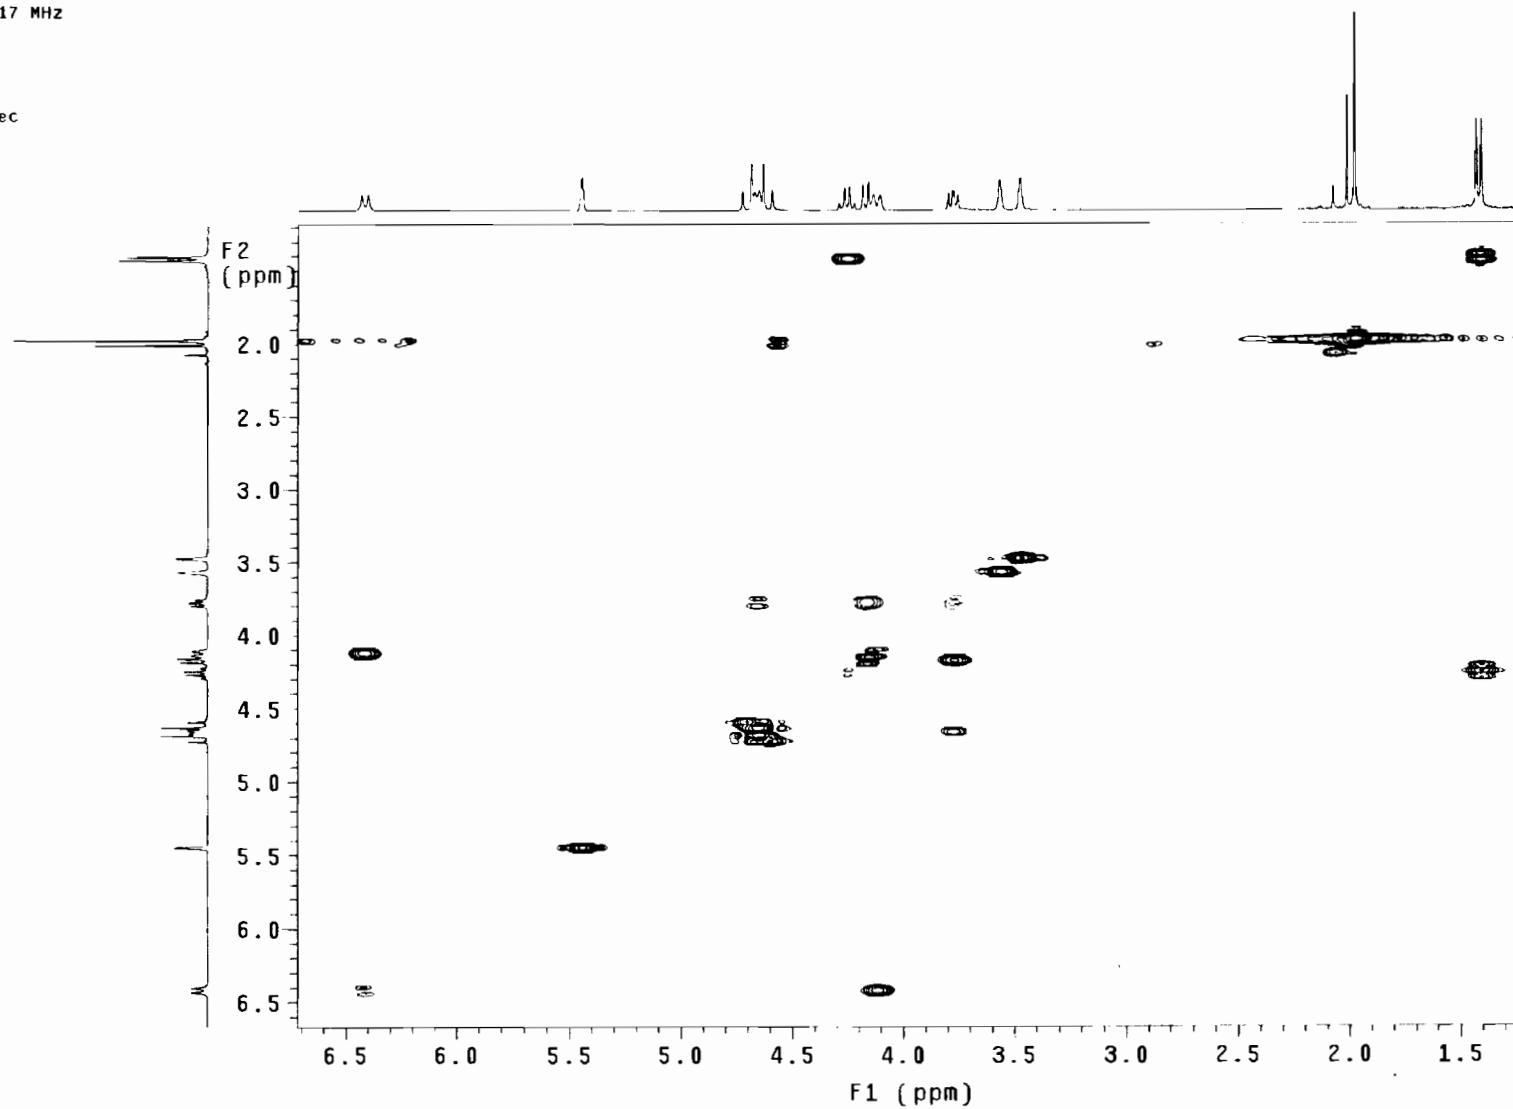

DHL-26-2

Pulse Sequence: relayh

Solvent: CDCl<sub>3</sub>

Ambient temperature

UNITYplus-300 "nmr3a.chem.nd.edu"

Relax. delay 1.400 sec

COSY 90-90

Acq. time 0.125 sec

Width 2045.6 Hz

2D Width 2045.6 Hz

4 repetitions

128 increments

OBSERVE H1, 299.9468517 MHz

DATA PROCESSING

Sine bell 0.063 sec

F1 DATA PROCESSING

Sine bell 0.063 sec

FT size 2048 x 1024

Total time 13 min, 29 sec

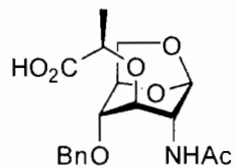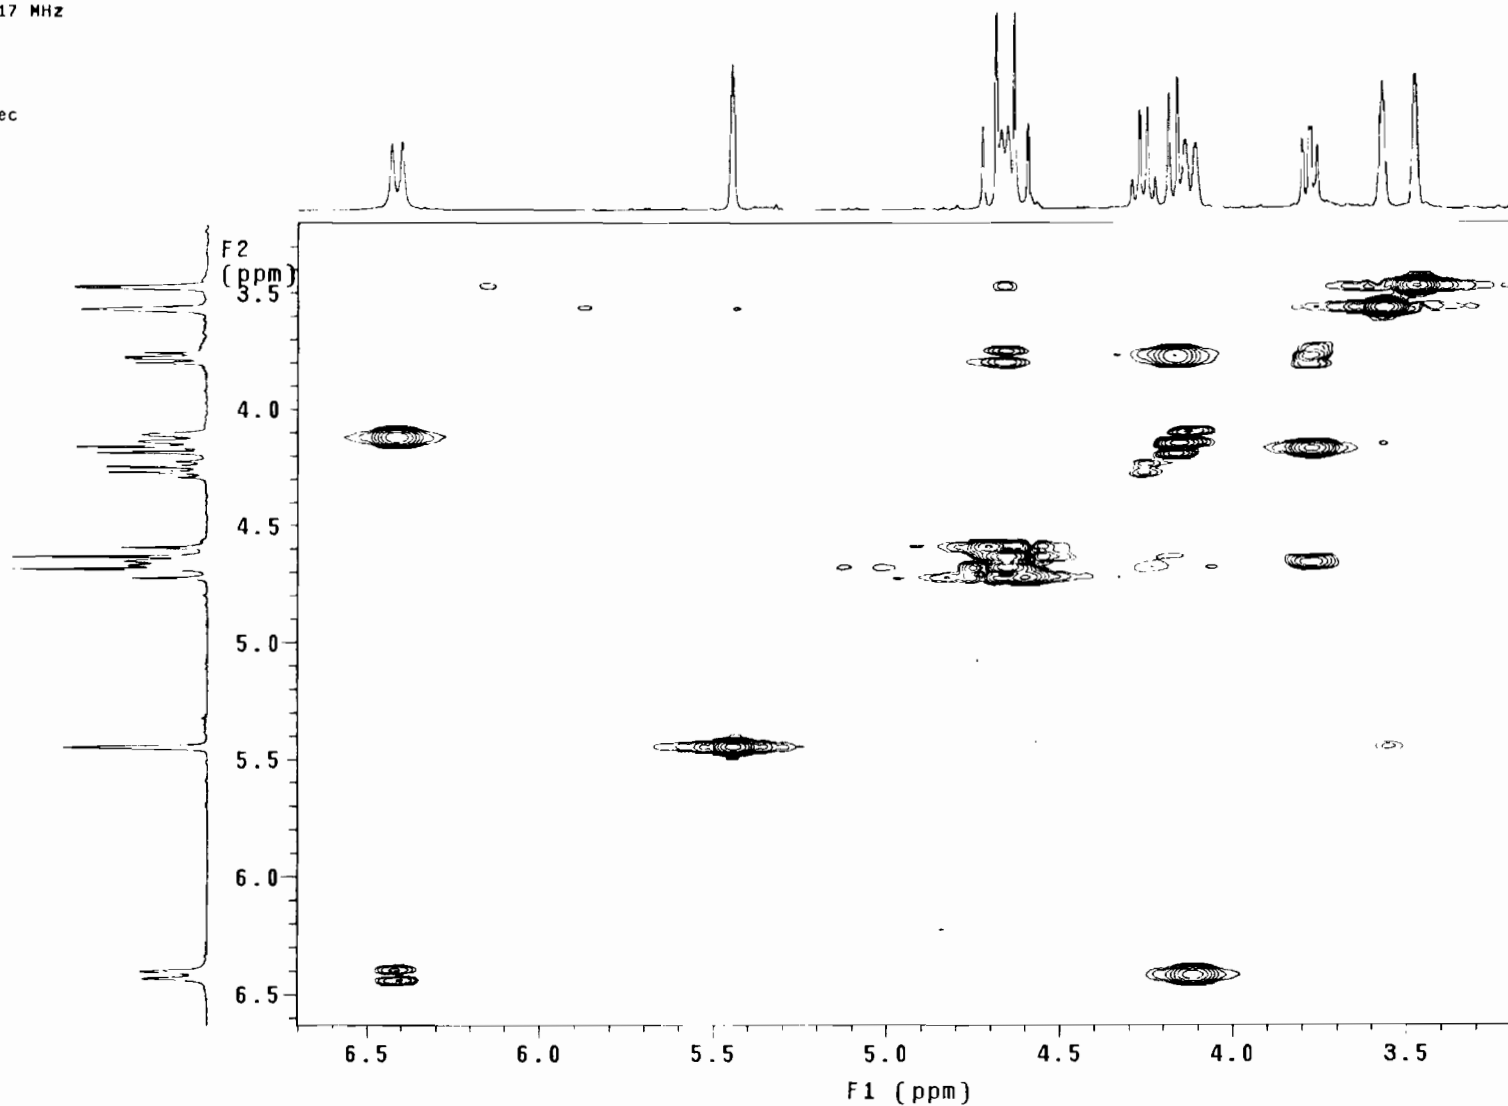

DHL-26-2

exp2 s2pu1

|             |             |            |             |
|-------------|-------------|------------|-------------|
| SAMPLE      |             | DEC. & VT  |             |
| date        | Jan 30 2007 | dfrq       | 299.949     |
| solvent     | CDC13       | dn         | H1          |
| file        | exp         | dpwr       | 40          |
| ACQUISITION |             | dof        | 272.7       |
| sfrq        | 75.429      | dm         | yyy         |
| tn          | C13         | dmm        | w           |
| at          | 0.957       | dmf        | 8033        |
| np          | 32768       | dseq       |             |
| sw          | 17116.0     | dres       | 1.0         |
| fb          | 9400        | homo       | n           |
| bs          | 4           | PROCESSING |             |
| tpwr        | 59          | lb         | 1.00        |
| pw          | 8.3         | wtfile     |             |
| d1          | 2.000       | proc       | ft          |
| tof         | 0           | fn         | 65536       |
| nt          | 1200        | math       | f           |
| ct          | 47          |            |             |
| alock       | n           | werr       |             |
| gain        | not used    | wexp       | process plc |
| FLAGS       |             | wls        | wft         |
| ll          | n           | wnt        |             |
| in          | n           |            |             |
| dp          | y           |            |             |
| hs          | nn          |            |             |
| DISPLAY     |             |            |             |
| sp          | 748.0       |            |             |
| wp          | 12797.1     |            |             |
| vs          | 52          |            |             |
| sc          | 0           |            |             |
| wc          | 250         |            |             |
| hzmm        | 51.19       |            |             |
| is          | 500.00      |            |             |
| rfl         | 6836.0      |            |             |
| rfp         | 5807.5      |            |             |
| th          | 7           |            |             |
| ins         | 100.000     |            |             |
| nm          | cdc         | ph         |             |

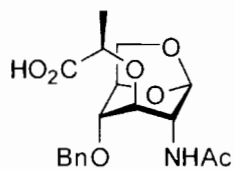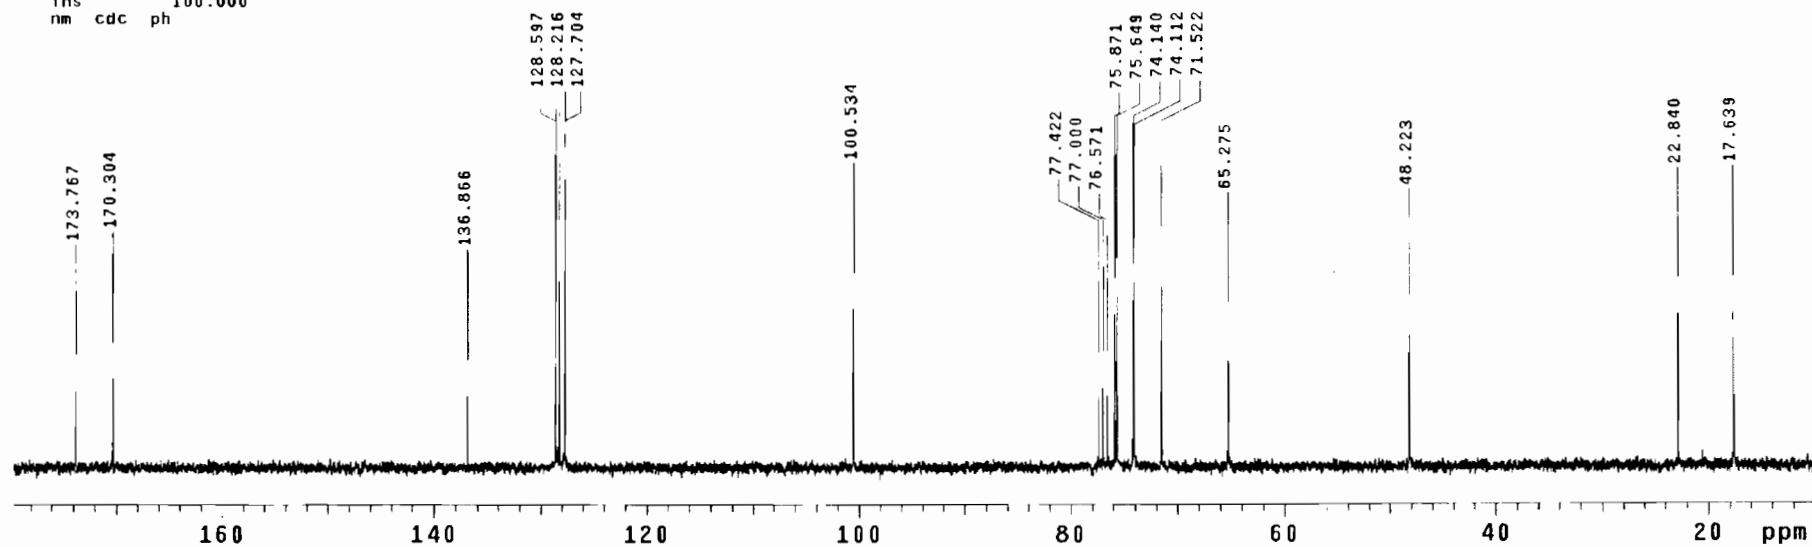

DHL-26-2

Pulse Sequence: dept

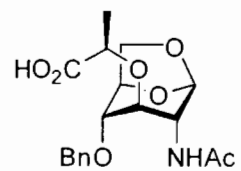

CH3 carbons

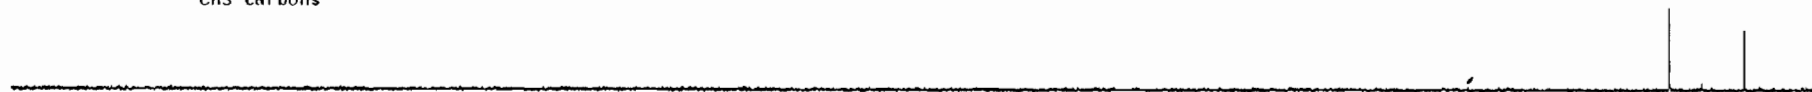

CH2 carbons

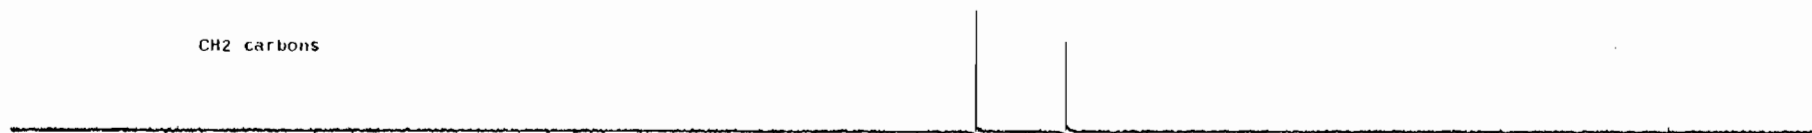

CH carbons

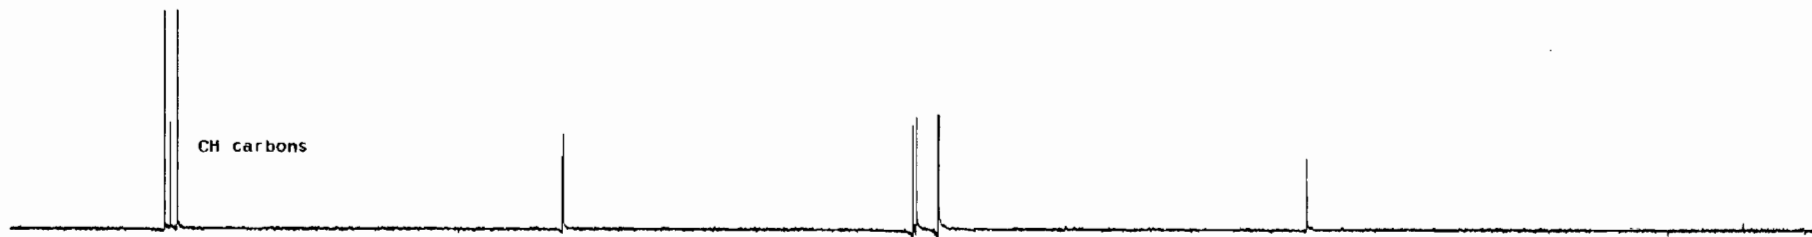

all protonated carbons

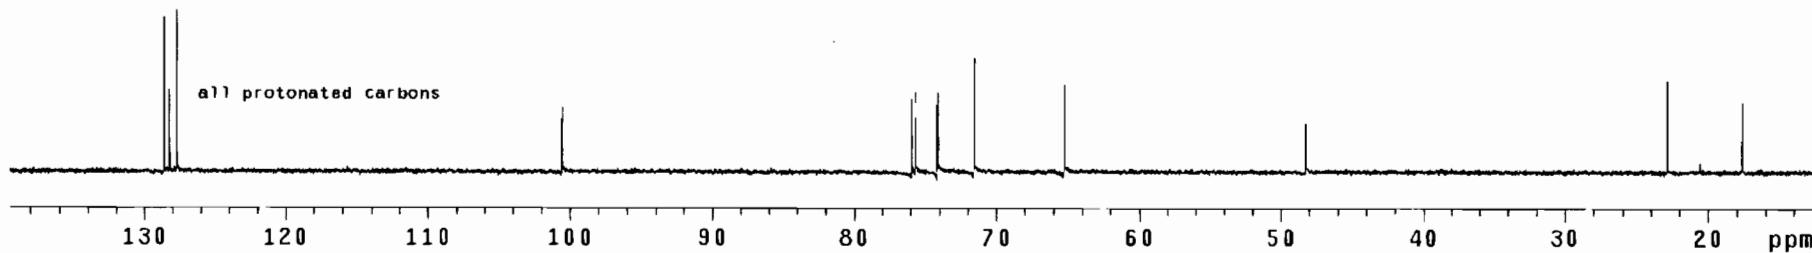

DHL-26-2

Pulse Sequence: hetcor

Solvent: CDCl<sub>3</sub>

Ambient temperature

User: 1-14-87

INOVA-500 "inova5"

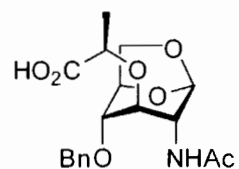

Relax. delay 1.500 sec

Acq. time 0.111 sec

Width 18403.5 Hz

2D Width 3382.4 Hz

8 repetitions

256 increments

OBSERVE C13, 125.6902068 MHz

DECOUPLE H1, 499.8633942 MHz

Power 40 dB

on during acquisition

off during delay

WALTZ-16 modulated

DATA PROCESSING

Line broadening 1.0 Hz

F1 DATA PROCESSING

Line broadening 0.3 Hz

FT size 4096 x 512

Total time 5/ min, 13 sec

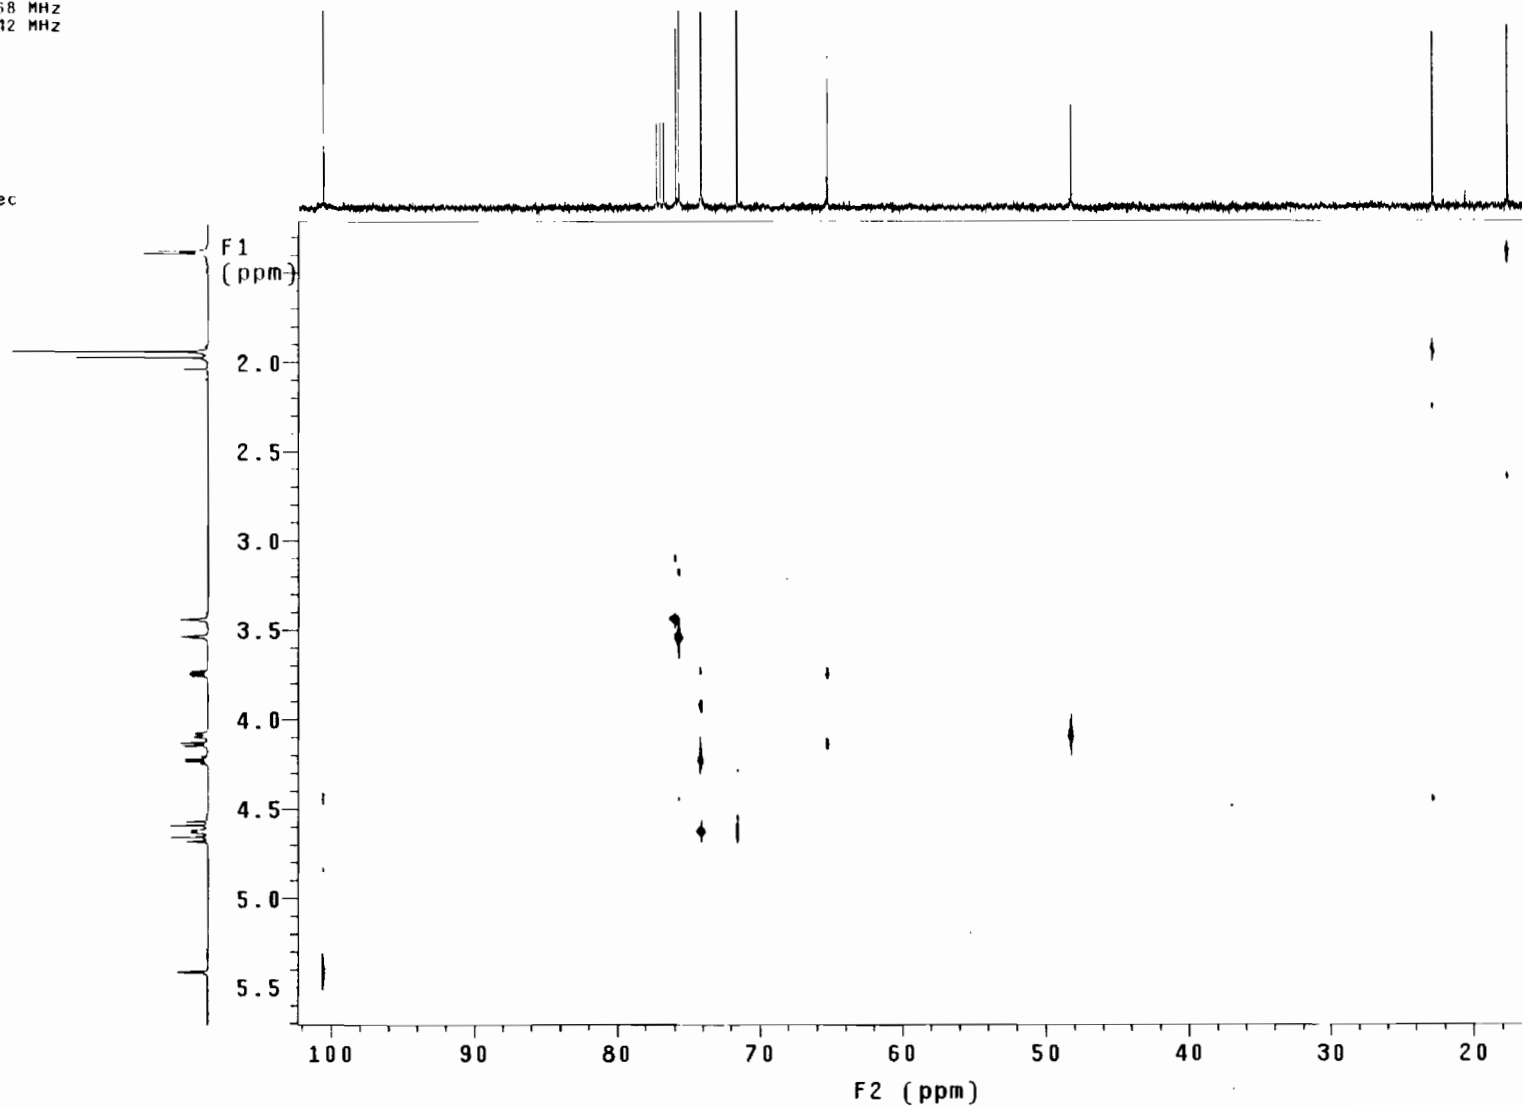

DHL-26-2

Pulse Sequence: hetcor

Solvent: CDCl<sub>3</sub>

Ambient temperature

User: 1-14-87

INOVA-500 "inova5"

Relax. delay 1.500 sec

Acq. time 0.111 sec

Width 18403.5 Hz

2D Width 3382.4 Hz

8 repetitions

256 increments

OBSERVE C13, 125.6902068 MHz

DECOUPLE H1, 499.8633942 MHz

Power 40 dB

on during acquisition

off during delay

WALTZ-16 modulated

DATA PROCESSING

Line broadening 1.0 Hz

F1 DATA PROCESSING

Line broadening 0.3 Hz

FT size 4096 x 512

Total time 57 min, 13 sec

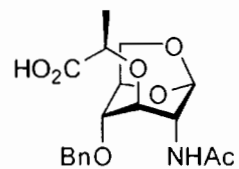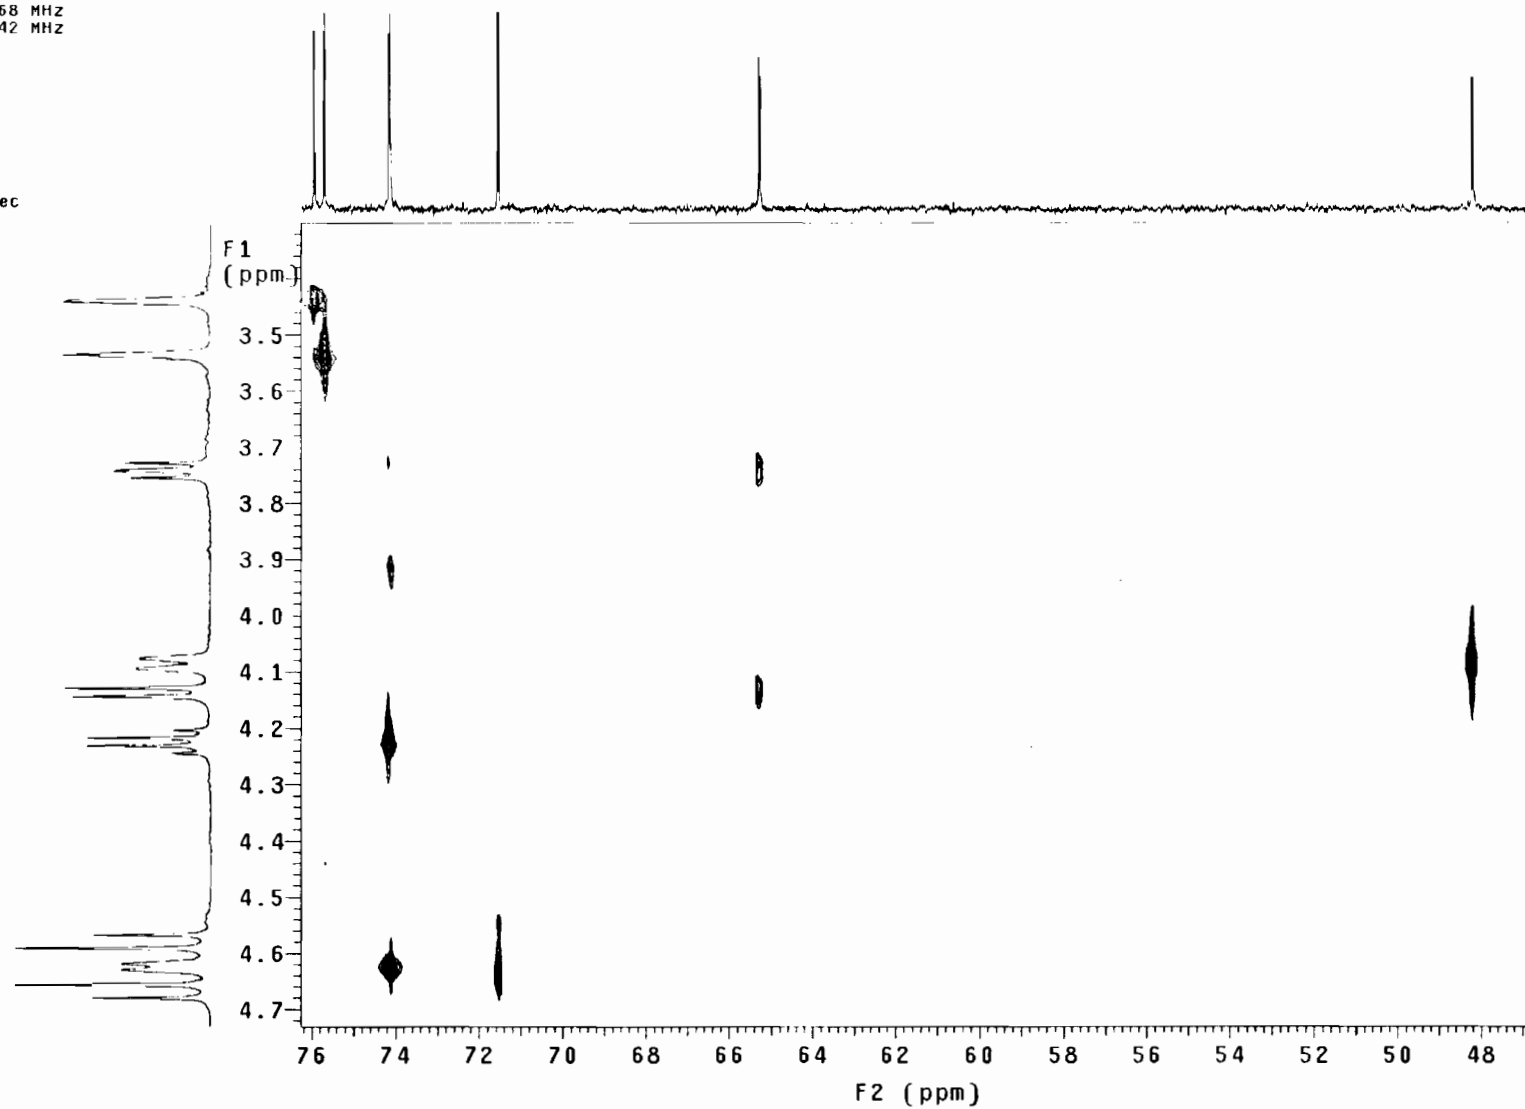

DHL27

exp1 s2pu1

| SAMPLE      |             | DEC. & VT  |             |
|-------------|-------------|------------|-------------|
| date        | Feb 23 2007 | dfrq       | 499.866     |
| solvent     | CD3CN       | dn         | H1          |
| file        | exp         | dpwr       | 30          |
| ACQUISITION |             | dof        | 0           |
| sfrq        | 499.867     | dm         | nan         |
| tn          | H1          | dmm        | c           |
| at          | 5.016       | dmf        | 200         |
| np          | 65536       | dseq       |             |
| sw          | 6533.3      | dres       | 1.0         |
| fb          | 4000        | homo       | n           |
| bs          | 4           | DEC2       |             |
| tpwr        | 61          | dfrq2      | 0           |
| pw          | 13.5        | dn2        |             |
| d1          | 0.100       | dpwr2      | 1           |
| tof         | 269.9       | dof2       | 0           |
| nt          | 16          | dm2        | n           |
| ct          | 16          | dmm2       | c           |
| alock       | n           | dmf2       | 200         |
| gain        | not used    | dseq2      |             |
| FLAGS       |             | dres2      | 1.0         |
| il          | n           | homo2      | n           |
| tn          | n           | DEC3       |             |
| dp          | y           | dfrq3      | 0           |
| hs          | nn          | dn3        |             |
| DISPLAY     |             | dpwr3      | 1           |
| sp          | 562.0       | dof3       | 0           |
| wp          | 3863.2      | dm3        | n           |
| vs          | 94          | dmm3       | c           |
| sc          | 0           | dmf3       | 200         |
| wc          | 250         | dseq3      |             |
| hzmm        | 15.45       | dres3      | 1.0         |
| is          | 145.68      | homo3      | n           |
| rfl         | 519.6       | PROCESSING |             |
| rfp         | 0           | wtfile     |             |
| th          | 7           | proc       | ft          |
| ins         | 1.000       | fn         | 65536       |
| ai          | ph          | math       | f           |
|             |             | werr       |             |
|             |             | wexp       | process p1H |
|             |             | wbs        |             |
|             |             | wnt        | wft         |

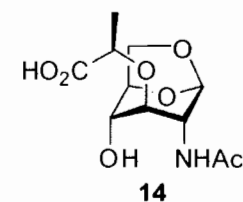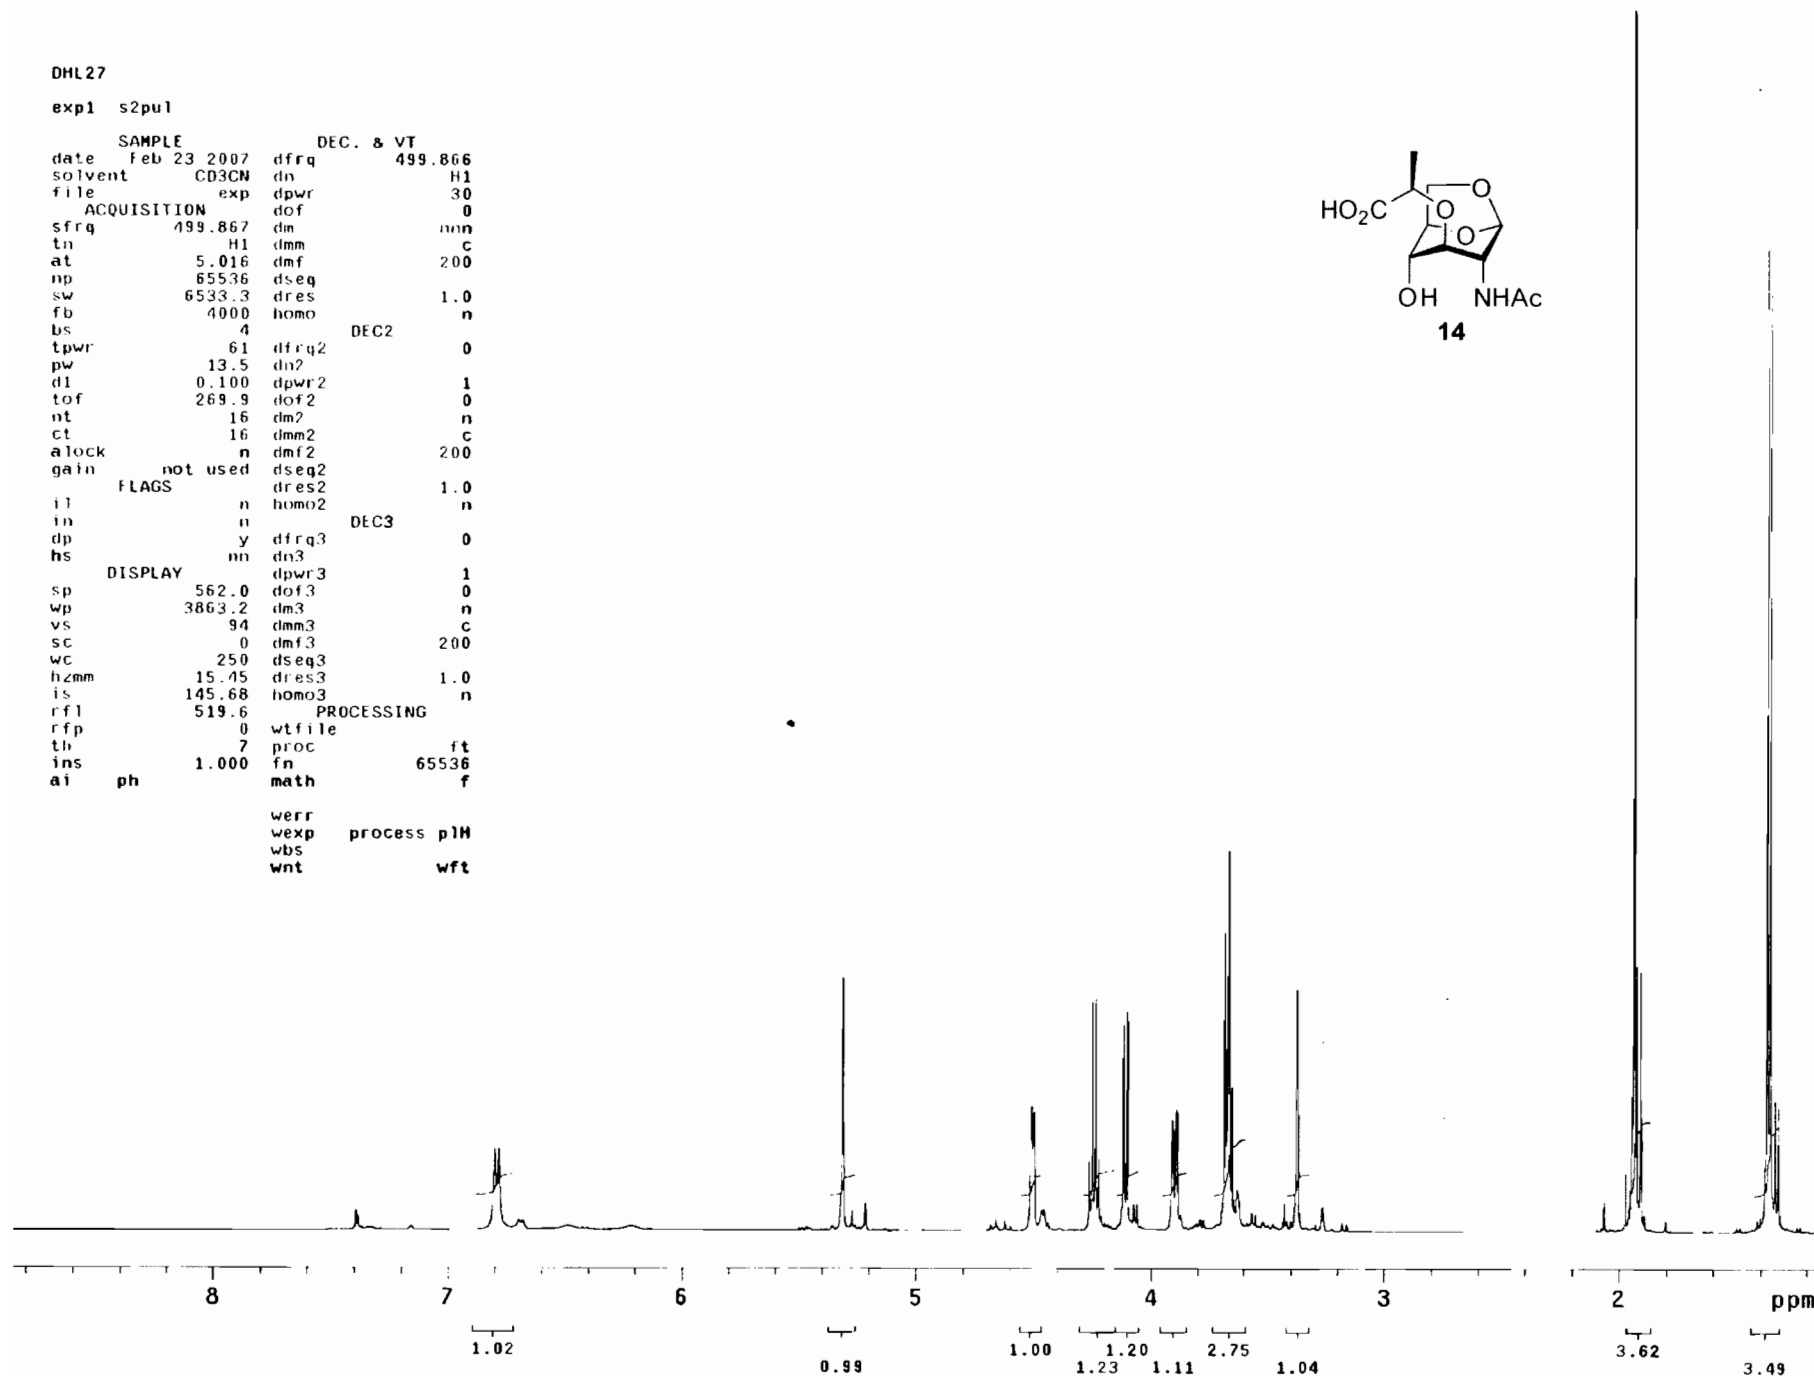

DHL27

Pulse Sequence: relayh

Solvent: CD3CN  
Ambient temperature  
INOVA-500 "inova5"

Relax. delay 1.300 sec  
COSY 90-90  
Acq. time 0.174 sec  
Width 2939.4 Hz  
2D Width 2939.4 Hz  
4 repetitions  
256 increments  
OBSERVE H1, 499.8638284 MHz  
DATA PROCESSING  
Sine bell 0.087 sec  
F1 DATA PROCESSING  
Sine bell 0.044 sec  
FT size 1024 x 1024  
Total time 26 min, 16 sec.

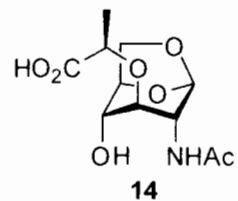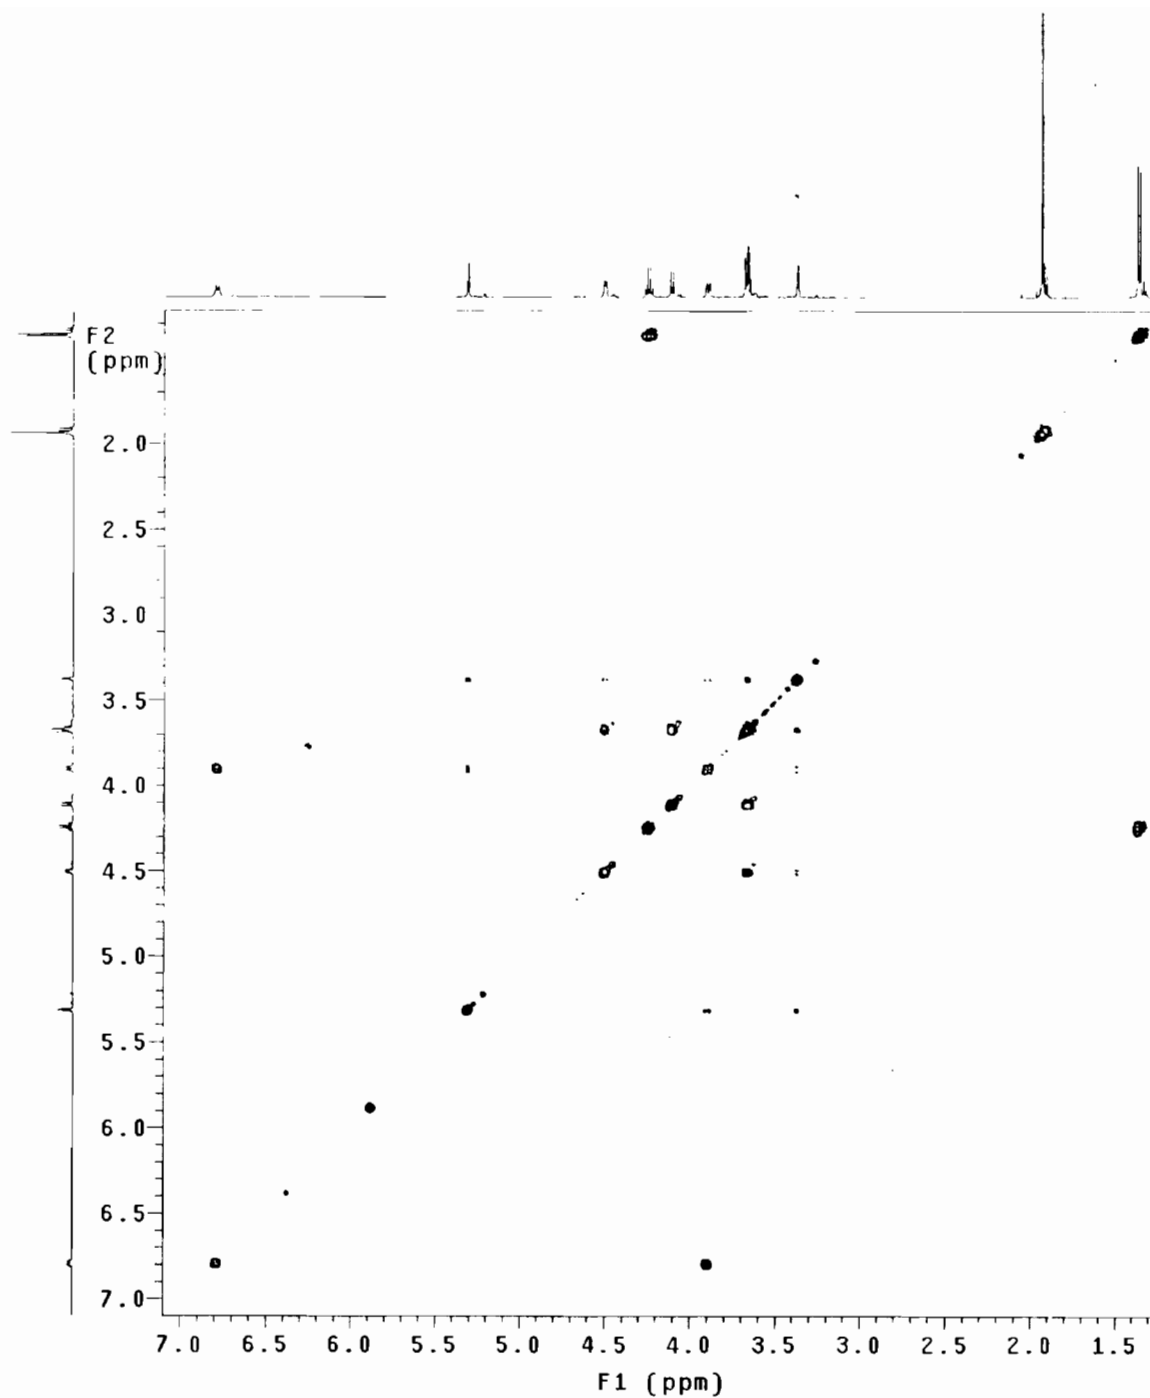

DHL27

Pulse Sequence: relayh

Solvent: CD3CN

Ambient temperature

INOVA-500 "Inova5"

Relax. delay 1.300 sec

COSY 90-90

Acq. time 0.174 sec

Width 2939.4 Hz

2D Width 2939.4 Hz

4 repetitions

256 increments

OBSERVE H1, 499.8638281 MHz

DATA PROCESSING

Sine bell 0.087 sec

F1 DATA PROCESSING

Sine bell 0.044 sec

FT size 1024 x 1024

Total time 26 min, 16 sec

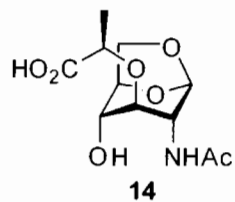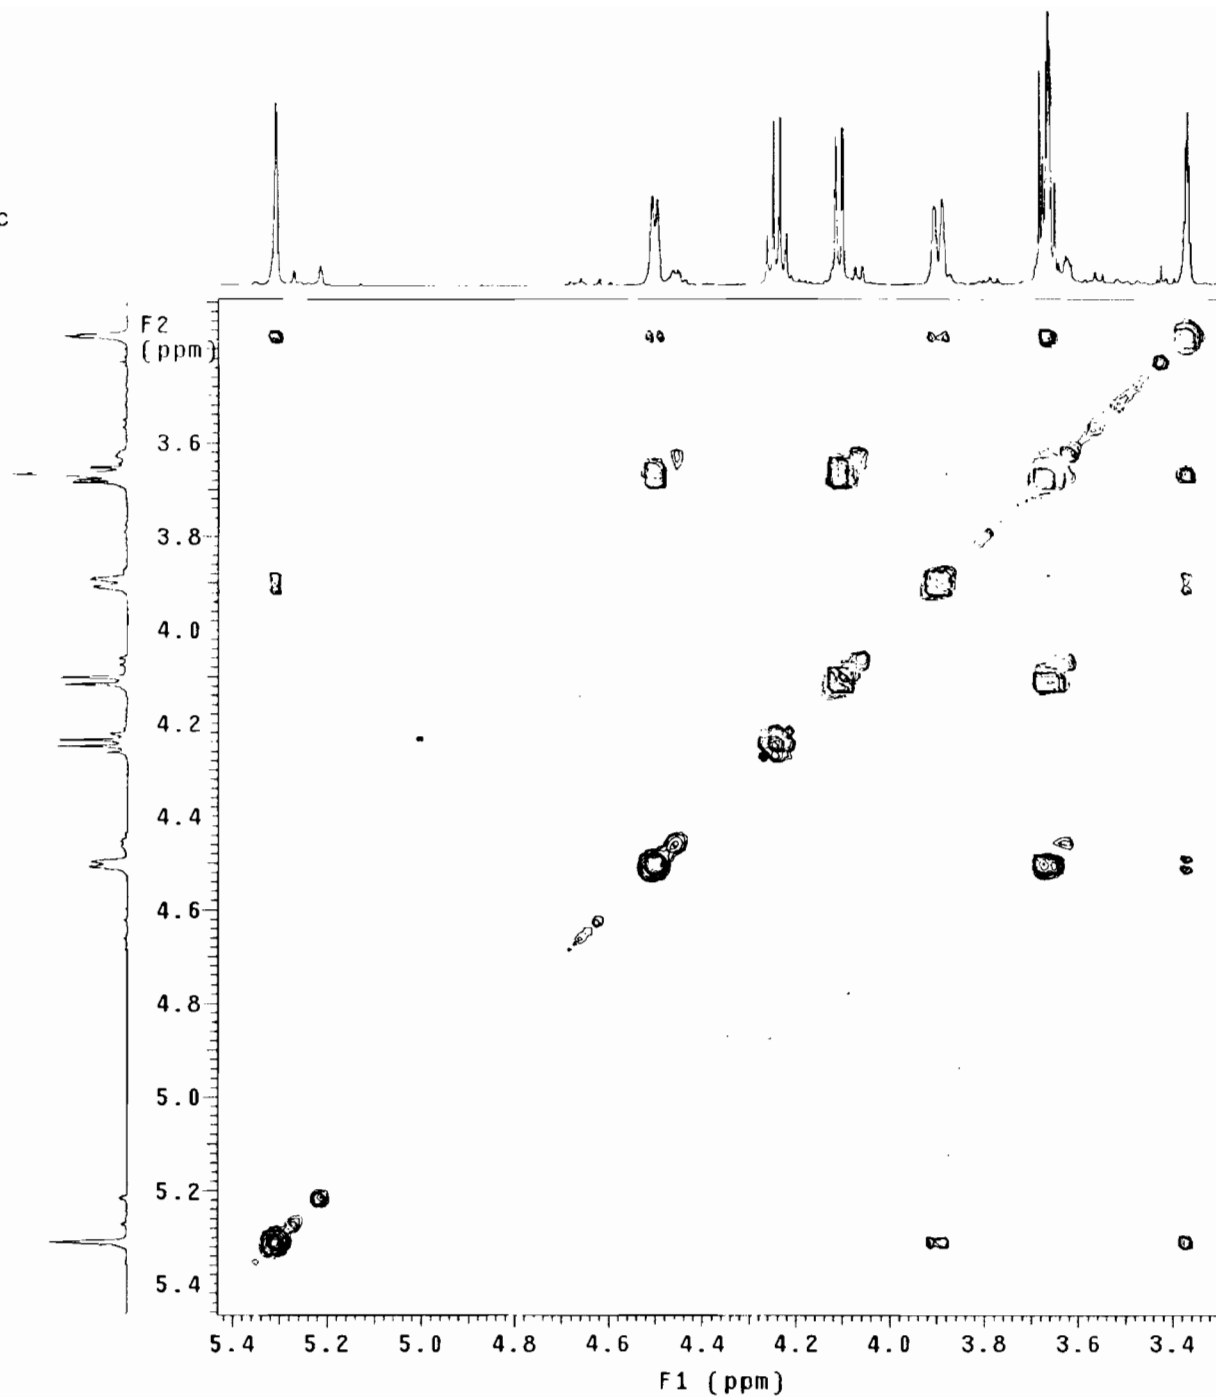

DHL27

exp2 s2pu1

| SAMPLE      |             | DEC. & VT  |         |
|-------------|-------------|------------|---------|
| date        | Feb 23 2007 | dfrq       | 499.866 |
| solvent     | cd3cn       | dn         | H1      |
| file        | exp         | dpwr       | 40      |
| ACQUISITION |             | dof        | 0       |
| sfrq        | 125.703     | dm         | yyy     |
| tn          | C13         | dmm        | w       |
| at          | 1.215       | dmf        | 8787.35 |
| np          | 65536       | dseq       |         |
| sw          | 26963.3     | dres       | 1.0     |
| fb          | 15000       | homo       | n       |
| bs          | 4           | DEC2       |         |
| tpwr        | 52          | dfrq2      | 0       |
| pw          | 10.2        | dn2        |         |
| d1          | 1.800       | dpwr2      | 1       |
| tof         | 144.5       | dof2       | 0       |
| nt          | 1200        | dm2        | n       |
| ct          | 81          | dmm2       | c       |
| alock       | n           | dmf2       | 10000   |
| gain        | not used    | dseq2      |         |
| FLAGS       |             | dres2      | 1.0     |
| rl          | n           | homo2      | n       |
| in          | n           | DEC3       |         |
| dp          | y           | dfrq3      | 0       |
| hs          | nn          | dn3        |         |
| DISPLAY     |             | dpwr3      | 1       |
| sp          | 1804.6      | dof3       | 0       |
| wp          | 20868.4     | dm3        | n       |
| vs          | 63          | dmm3       | c       |
| sc          | 0           | dmf3       | 10000   |
| wc          | 250         | dseq3      |         |
| hzmm        | 83.47       | dres3      | 1.0     |
| is          | 500.00      | homo3      | n       |
| rfl         | 1477.0      | PROCESSING |         |
| rfp         | 163.4       | lb         | 1.00    |
| th          | 5           | wtfile     |         |
| ins         | 100.000     | proc       | ft      |
| ai          | cdc ph      | fn         | 131072  |
|             |             | math       | f       |

werr  
wexp  
wbs  
wnt

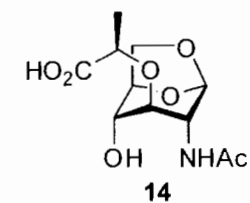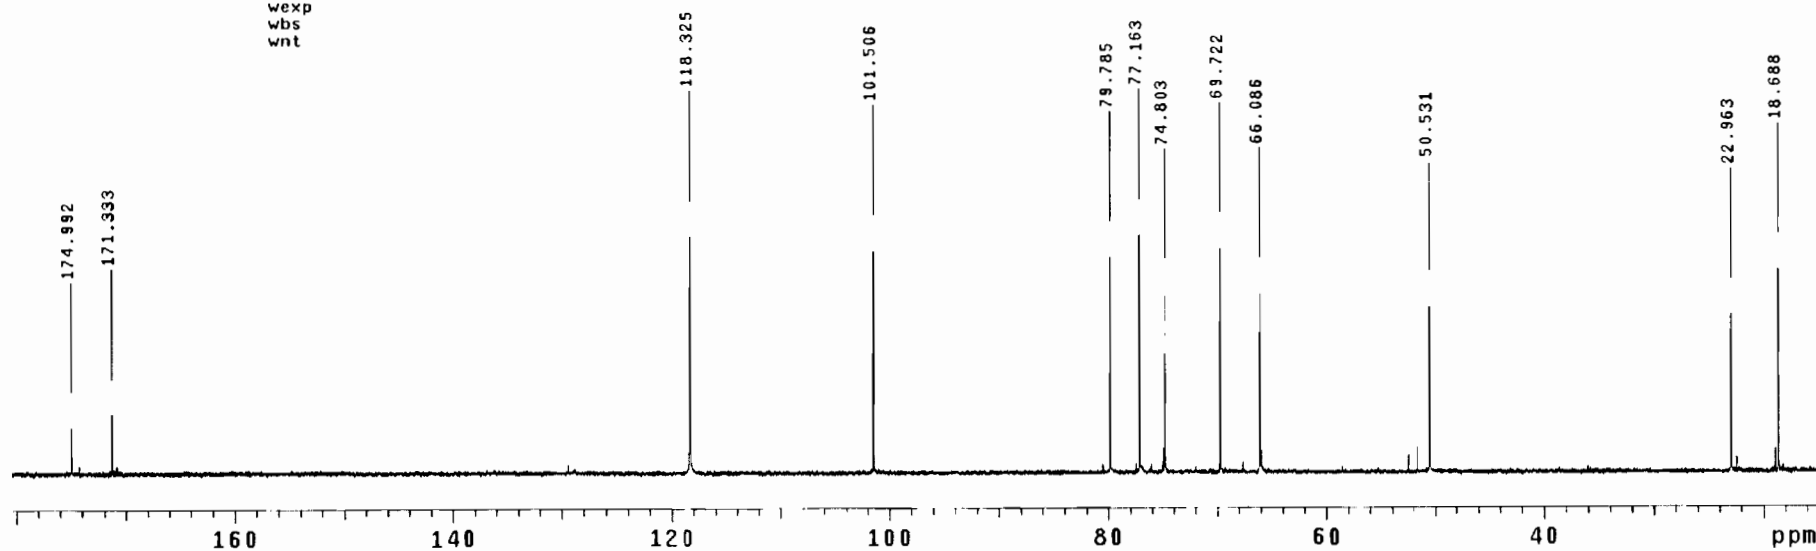

DHL-27

Pulse Sequence: dept

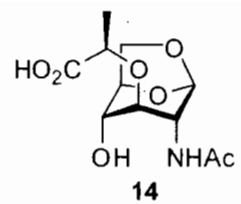

CH3 carbons

CH2 carbons

CH carbons

all protonated carbons

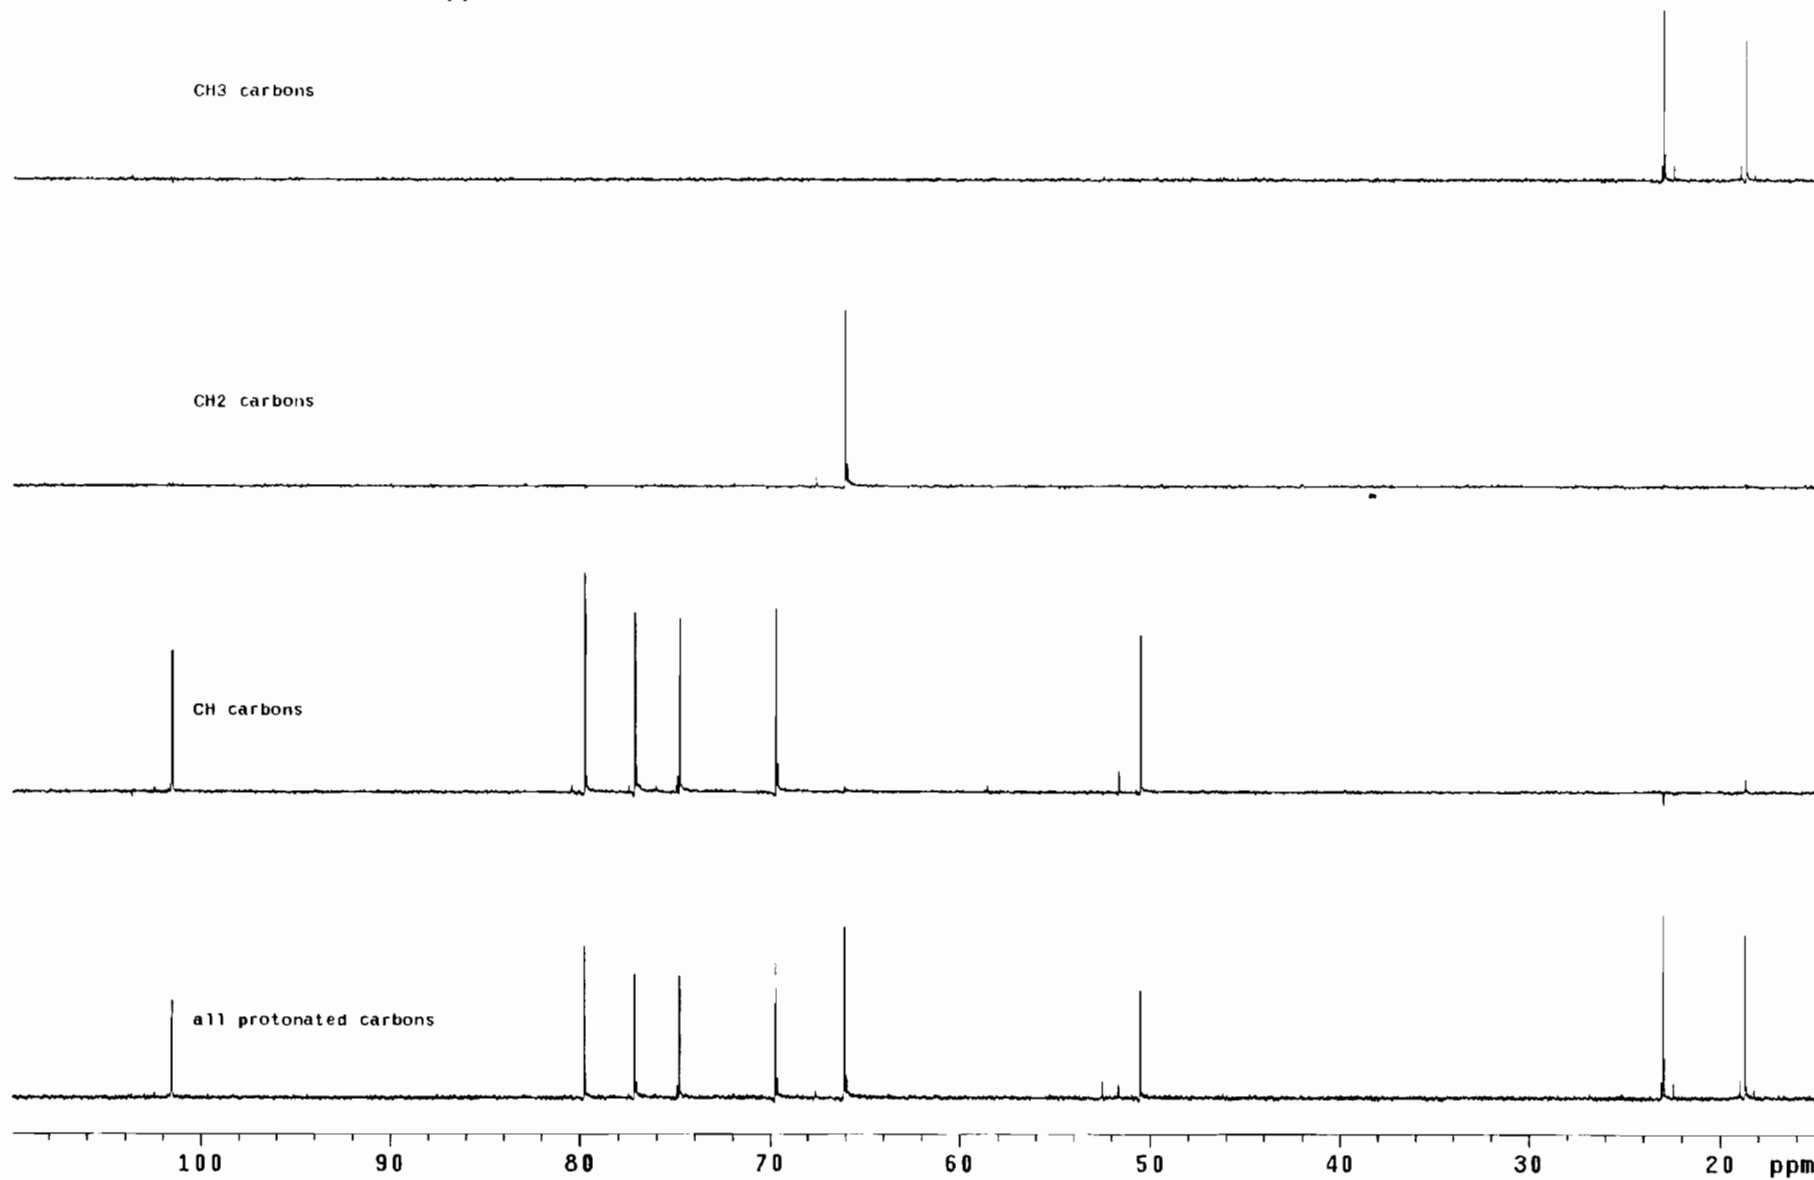

DHL-27

Pulse Sequence: hetcor

Solvent: cd3cn

Ambient temperature

User: 1-14-87

INOVA-500 "inova5"

Relax. delay 1.500 sec

Acq. time 0.111 sec

Width 18403.5 Hz

2D Width 2900.3 Hz

8 repetitions

256 increments

OBSERVE C13, 125.6907427 MHz

DECOUPLE H1, 499.8658787 MHz

Power 40 dB

on during acquisition

off during delay

WALTZ-16 modulated

DATA PROCESSING

Line broadening 1.0 Hz

F1 DATA PROCESSING

Line broadening 0.3 Hz

FT size 4096 x 512

Total time 57 min, 26 sec

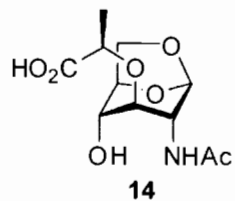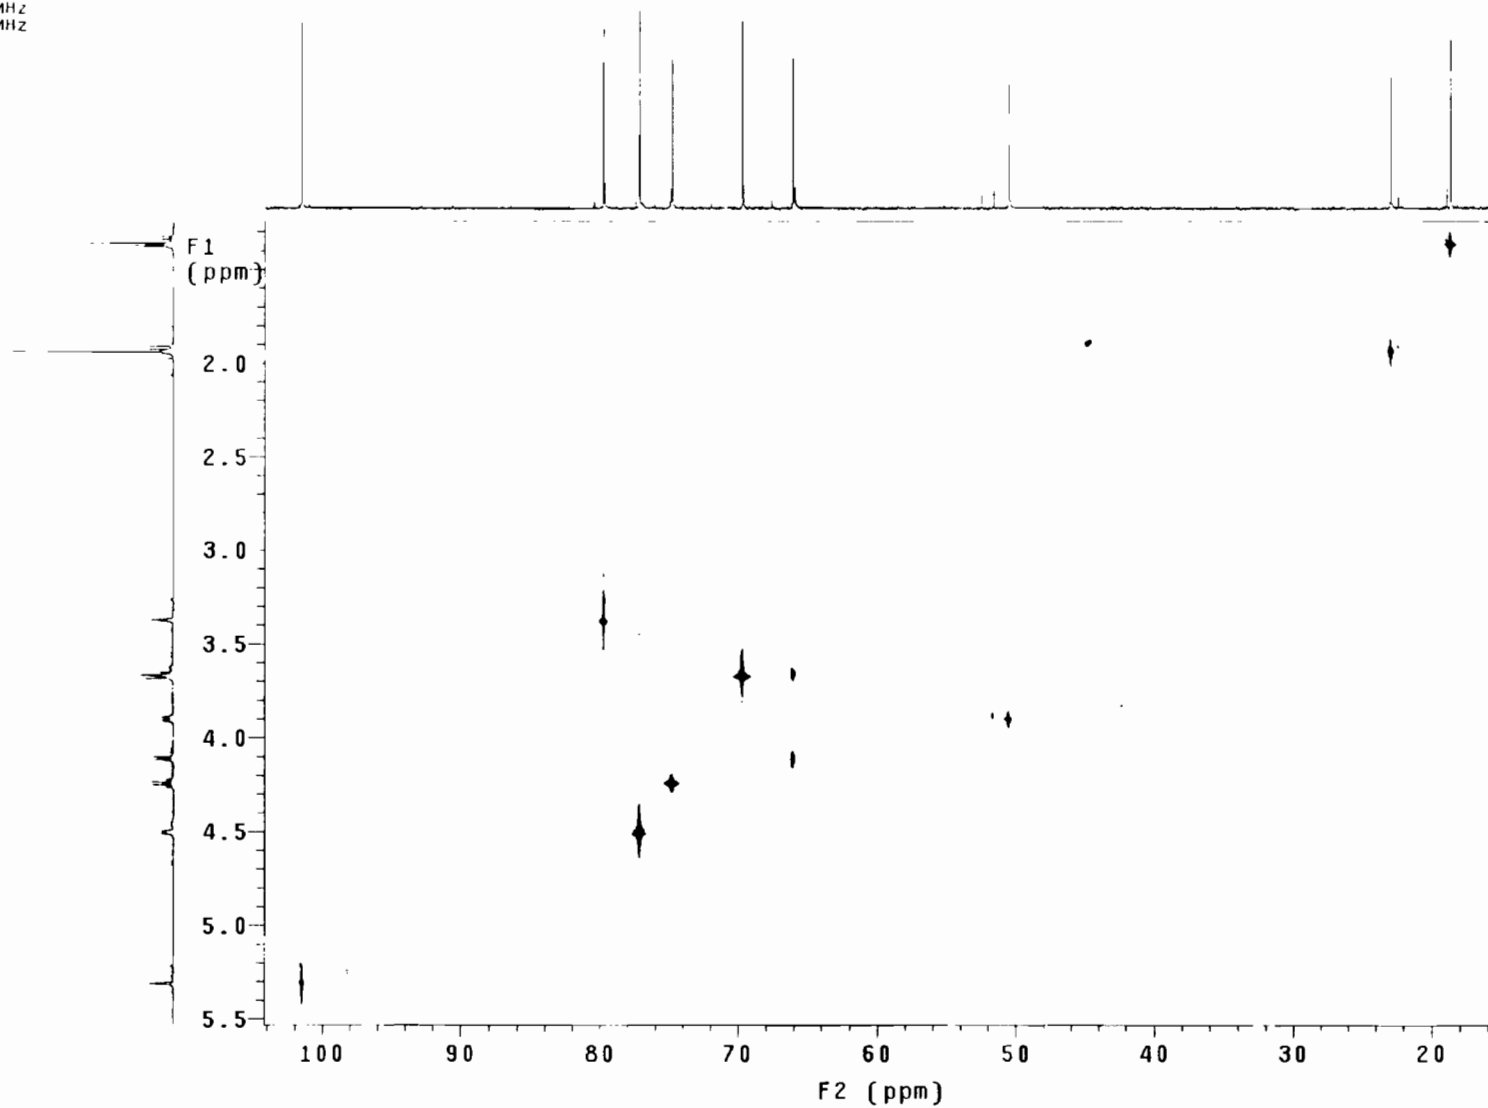

DHL-27

Pulse Sequence: hetcor

Solvent: cd3cn

Ambient temperature

User: 1-14-87

INOVA-500 "nova5"

Relax. delay 1.500 sec

Acq. time 0.111 sec

Width 18403.5 Hz

2D Width 2900.3 Hz

8 repetitions

256 increments

OBSERVE C13, 125.6907427 MHz

DECOUPLE H1, 499.8658787 MHz

Power 40 dB

on during acquisition

off during delay

WALTZ-16 modulated

DATA PROCESSING

Line broadening 1.0 Hz

F1 DATA PROCESSING

Line broadening 0.3 Hz

FT size 4096 x 512

Total time 57 min, 26 sec

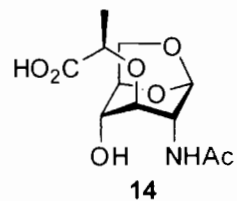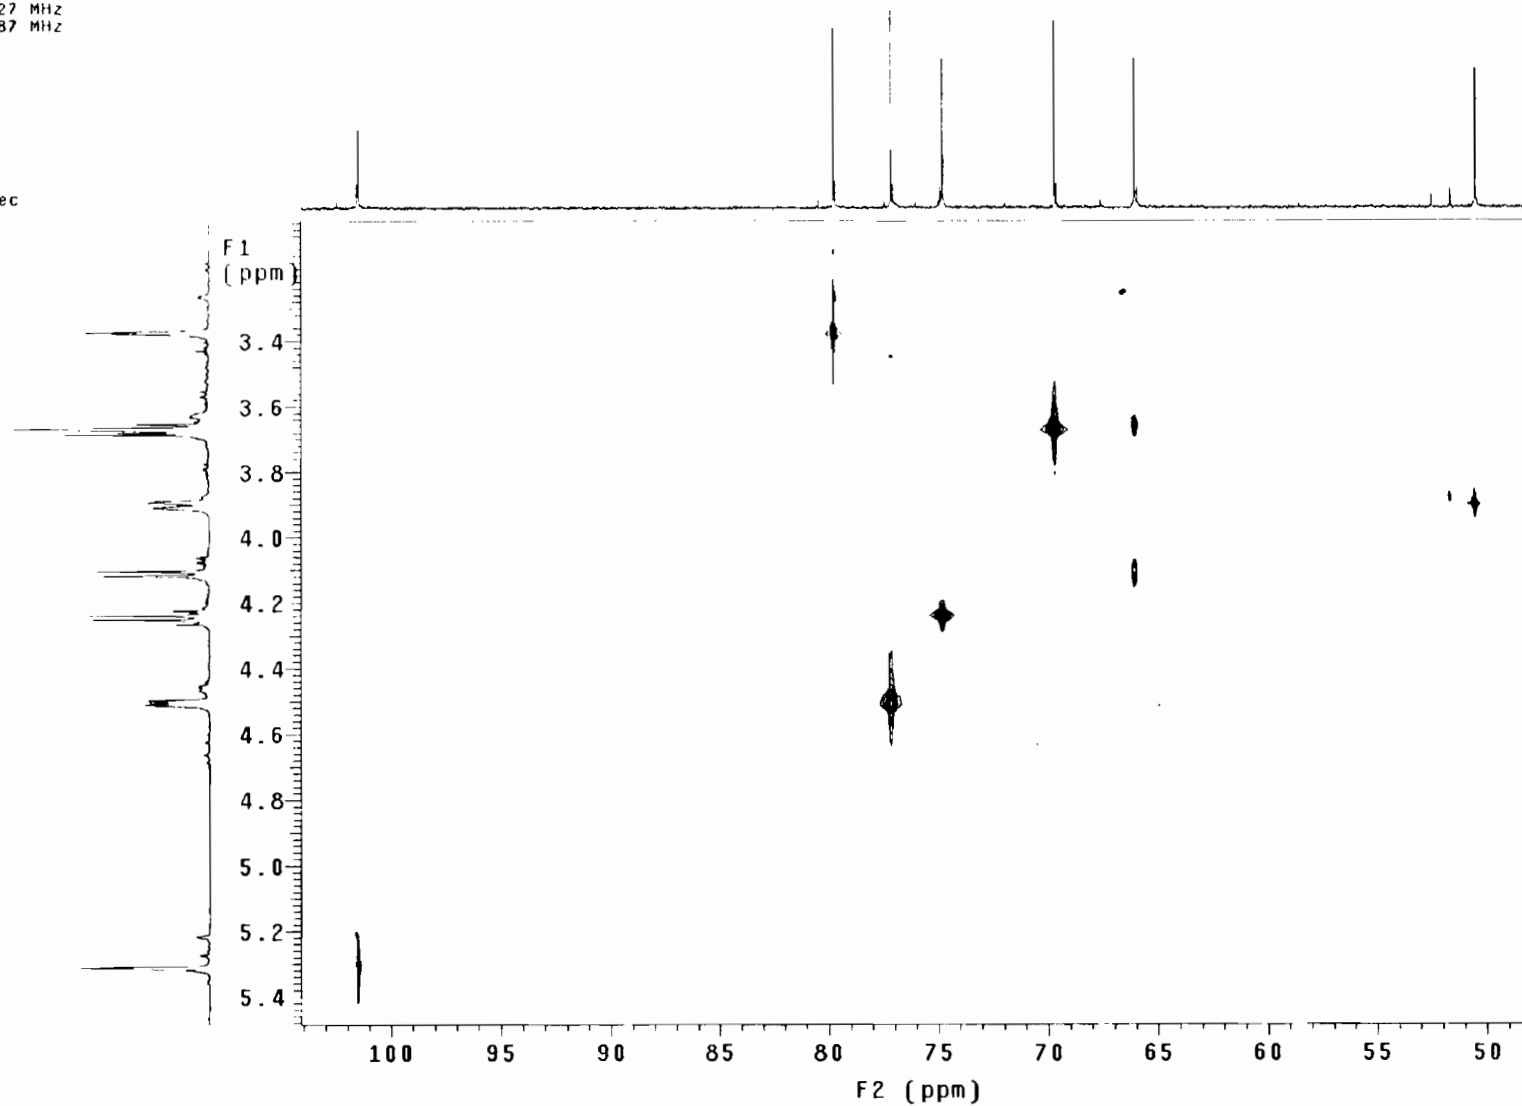

DHL-47

exp3 s2pu1

| SAMPLE               |                | DEC. & VT  |            |
|----------------------|----------------|------------|------------|
| date                 | Feb 1 2008     | dfrq       | 499.866    |
| solvent              | CD3CN          | dn         | H1         |
| file                 | /afs/nd.edu/u~ | dpwr       | 30         |
| ser26/dhesek/Priva~  |                | dof        | 0          |
| te/DHL/DHL-47-H.f.i~ |                | dm         | nnn        |
|                      |                | dmm        | c          |
| ACQUISITION          |                | dmf        | 200        |
| sfrq                 | 499.867        | dseq       |            |
| tn                   | H1             | dres       | 1.0        |
| at                   | 5.016          | homo       | n          |
| np                   | 65536          | DEC2       |            |
| sw                   | 6533.3         | dfrq2      | 0          |
| fb                   | 4000           | dn2        |            |
| bs                   | 4              | dpwr2      | 1          |
| tpwr                 | 61             | dof2       | 0          |
| pw                   | 13.5           | dm2        | n          |
| d1                   | 0.100          | dmm2       | c          |
| tof                  | 269.9          | dmf2       | 200        |
| nt                   | 16             | dseq2      |            |
| ct                   | 16             | dres2      | 1.0        |
| alock                | n              | homo2      | n          |
| gain                 | not used       | DEC3       |            |
| FLAGS                |                | dfrq3      | 0          |
| il                   | n              | dn3        |            |
| in                   | n              | dpwr3      | 1          |
| dp                   | y              | dof3       | 0          |
| hs                   | nn             | dm3        | n          |
| DISPLAY              |                | dmm3       | c          |
| sp                   | 635.2          | dmf3       | 200        |
| wp                   | 3854.4         | dseq3      |            |
| vs                   | 254            | dres3      | 1.0        |
| sc                   | 0              | homo3      | n          |
| wc                   | 250            | PROCESSING |            |
| hzmm                 | 15.42          | wtfile     |            |
| is                   | 400.00         | proc       | ft         |
| rfl                  | 523.8          | fin        | 65536      |
| rfp                  | 0              | math       | f          |
| th                   | 7              |            |            |
| ins                  | 1.000          | werr       |            |
| al                   | ph             | wexp       | process pH |
|                      |                | wbs        |            |
|                      |                | wnt        | wft        |

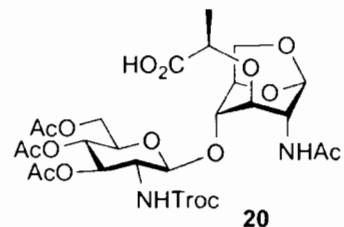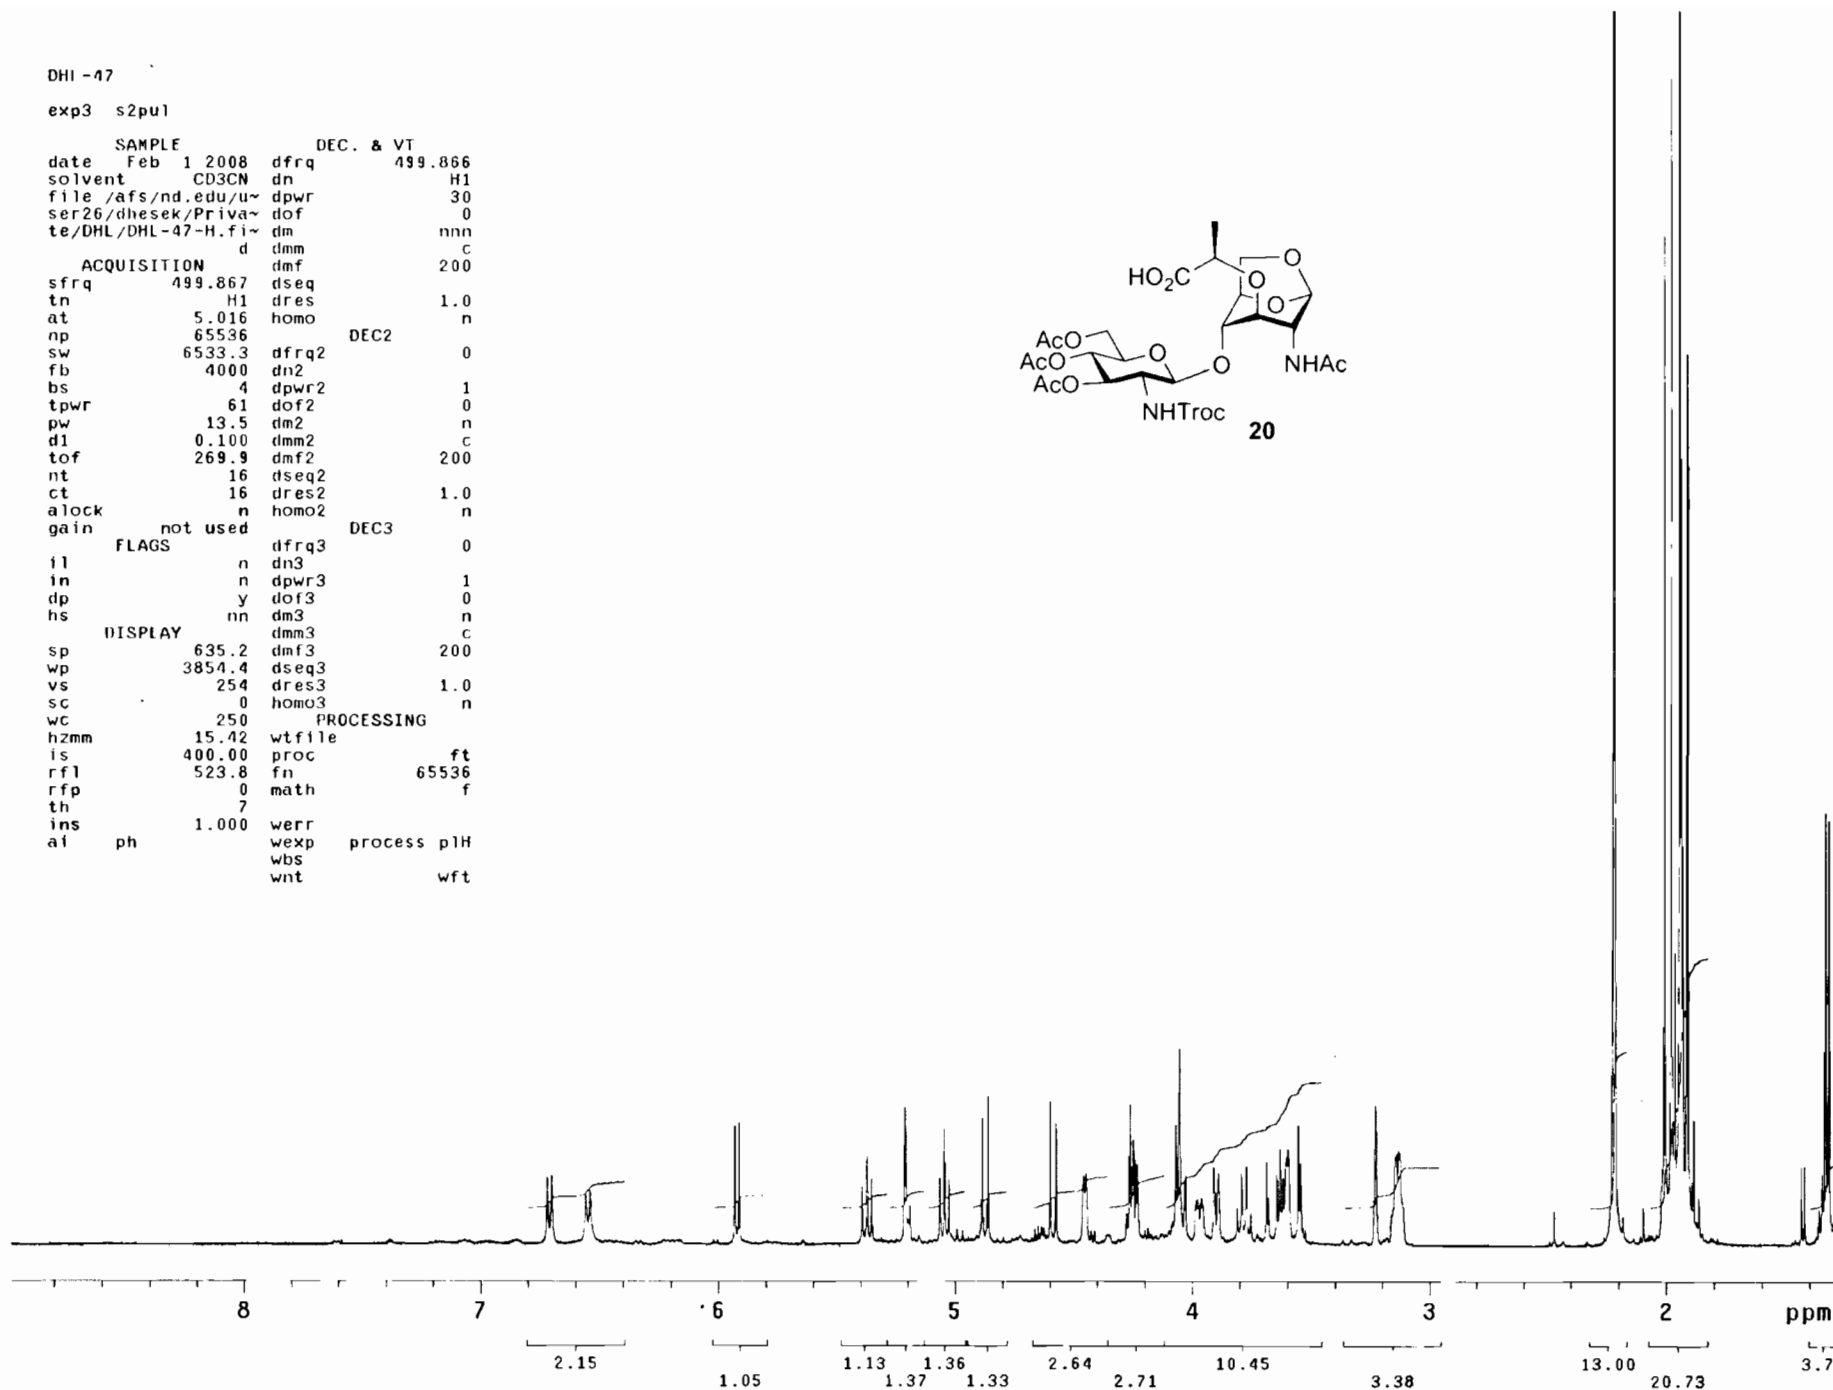

DHL-47

exp3 s2pu1

| SAMPLE              |                | DEC. & VT  |             |
|---------------------|----------------|------------|-------------|
| date                | Jan 31 2008    | dfrq       | 299.949     |
| solvent             | CDC13          | dn         | H1          |
| file                | /afs/nd.edu/u~ | dpwr       | 40          |
| ser26/dhesek/Priva~ |                | dof        | 272.7       |
| te/DHL/DHL-47-C.f~  |                | dm         | yyy         |
|                     | d              | dmm        | w           |
| ACQUISITION         |                | dmf        | 8033        |
| sfrq                | 75.429         | dseq       |             |
| tn                  | C13            | dres       | 1.0         |
| at                  | 0.957          | homo       | n           |
| np                  | 32768          | DEC2       |             |
| sw                  | 17116.0        | dfrq2      | undefined   |
| fb                  | 9400           | dn2        | undefined   |
| bs                  | 4              | dpwr2      | undefined   |
| tpwr                | 59             | dof2       | undefined   |
| pw                  | 8.3            | dm2        | undefined   |
| d1                  | 2.000          | dmm2       | undefined   |
| tof                 | 0              | dmf2       | undefined   |
| nt                  | 640            | dseq2      | undefined   |
| ct                  | 172            | dres2      | undefined   |
| alock               | n              | homo2      | undefined   |
| gain                | not used       | DEC3       |             |
| FLAGS               |                | dfrq3      | undefined   |
| il                  | n              | dn3        | undefined   |
| in                  | n              | dpwr3      | undefined   |
| dp                  | y              | dof3       | undefined   |
| hs                  | nn             | dm3        | undefined   |
| DISPLAY             |                | dmm3       | undefined   |
| sp                  | 770.4          | dmf3       | undefined   |
| wp                  | 12819.2        | dseq3      | undefined   |
| vs                  | 585            | dres3      | undefined   |
| sc                  | 0              | homo3      | undefined   |
| wc                  | 250            | PROCESSING |             |
| hzmm                | 51.28          | lb         | 1.00        |
| is                  | 500.00         | wtfile     |             |
| rfl                 | 6836.6         | proc       | ft          |
| rfp                 | 5807.5         | fn         | 65536       |
| th                  | 6              | math       | f           |
| ins                 | 100.000        |            |             |
| al                  | cdc ph         | werr       |             |
|                     |                | wexp       | process pic |
|                     |                | wbs        |             |
|                     |                | wnt        |             |

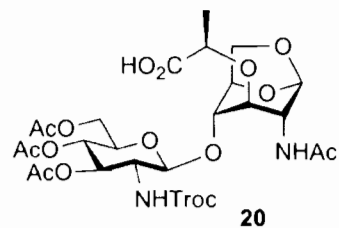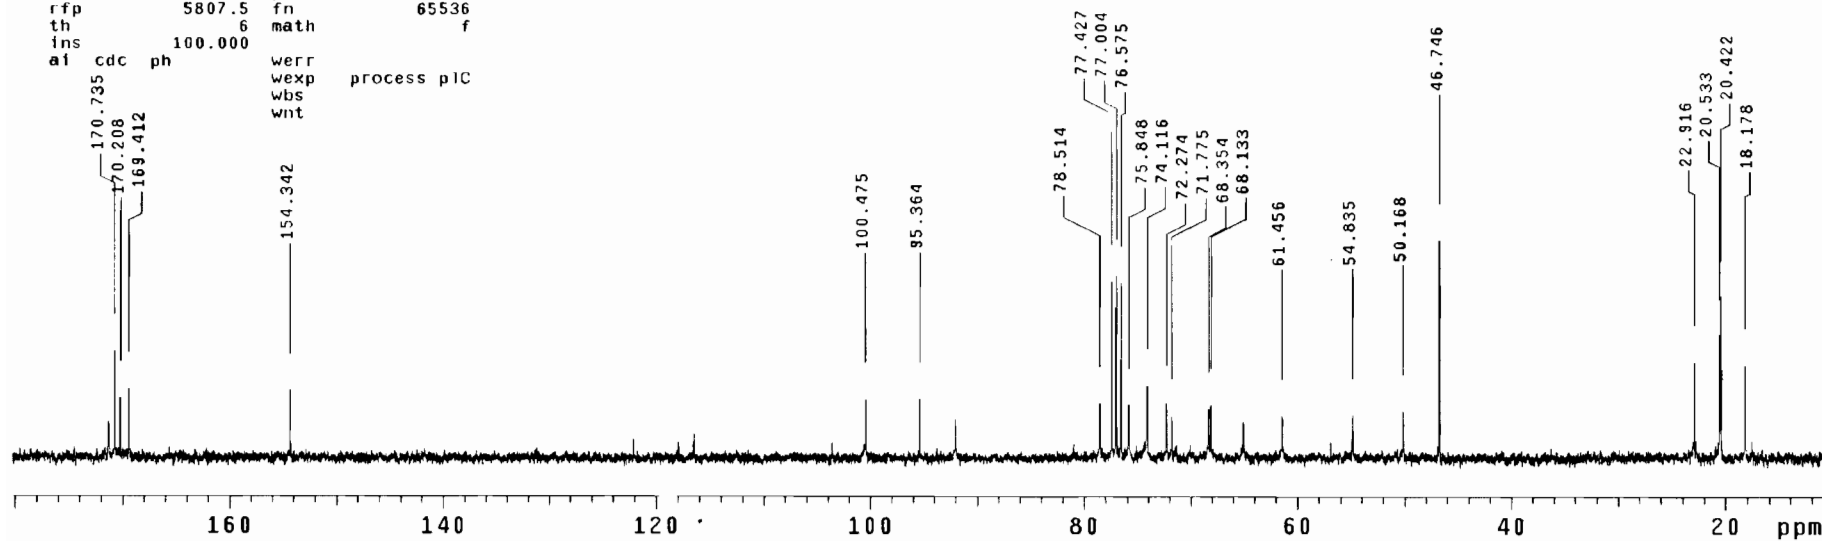

DHL-47

Pulse Sequence: dept

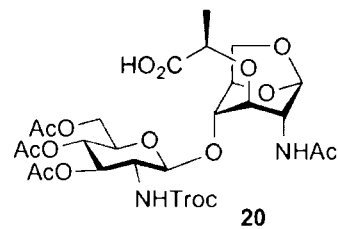

CH3 carbons

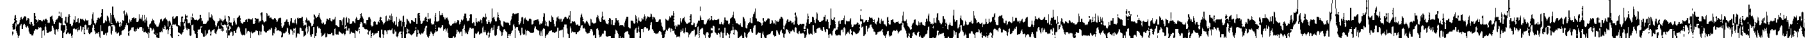

CH2 carbons

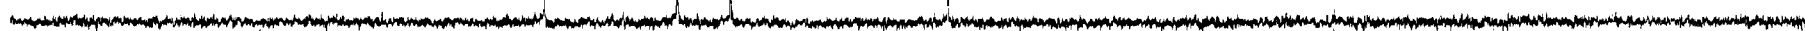

CH carbons

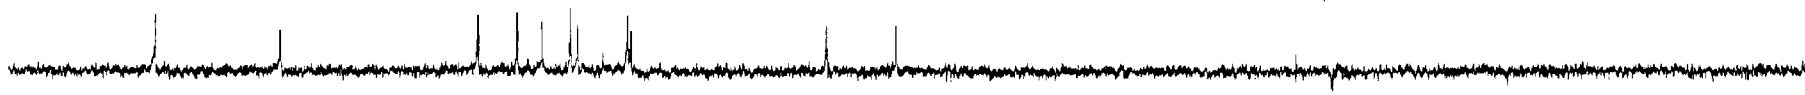

all protonated carbons

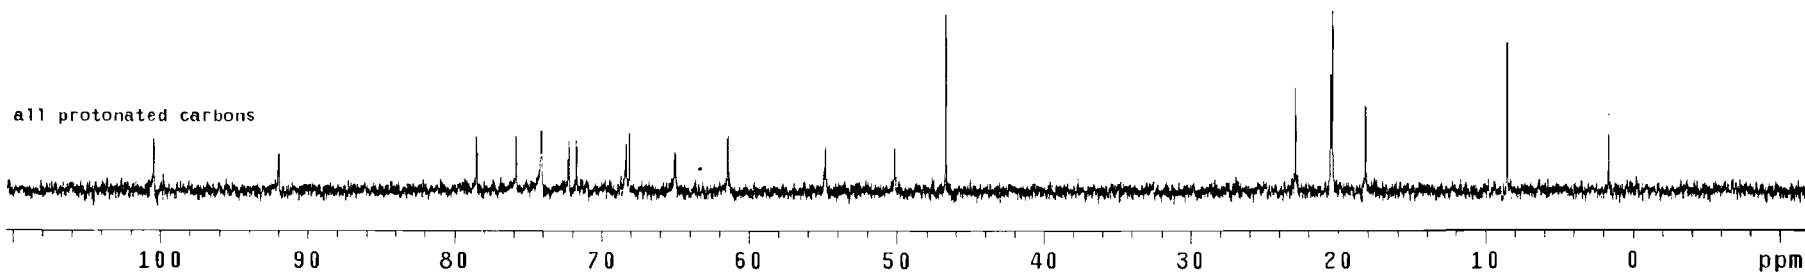

DHL-48\_3

exp1 Proton

|             |             |            |          |
|-------------|-------------|------------|----------|
| SAMPLE      |             | SPECIAL    |          |
| date        | Feb 17 2008 | temp       | 22.0     |
| solvent     | cd3od       | gain       | not used |
| file        | exp         | spin       | not used |
| ACQUISITION |             | hst        | 0.008    |
| sw          | 9615.4      | pw90       | 11.100   |
| at          | 3.408       | alfa       | 10.000   |
| np          | 65536       | FLAGS      |          |
| fb          | 4000        | il         | n        |
| bs          | 4           | in         | n        |
| ss          | 2           | dp         | y        |
| d1          | 1.000       | hs         | nn       |
| nt          | 16          | PROCESSING |          |
| ct          | 16          | fn         | 131072   |
| TRANSMITTER |             | DISPLAY    |          |
| tn          | H1          | sp         | 777.2    |
| sfrq        | 599.879     | wp         | 4561.9   |
| tof         | 599.8       | rfl        | 1208.5   |
| tpwr        | 61          | rpf        | 0        |
| pw          | 11.100      | rp         | -56.3    |
| DECOUPLER   |             | lp         | 5.8      |
| dn          | C13         | PLOT       |          |
| dof         | 0           | wc         | 250      |
| dm          | nnn         | sc         | 0        |
| dmm         | c           | vs         | 184      |
| dpwr        | 38          | th         | 50       |
| dmf         | 35088       | ai         | cdc ph   |

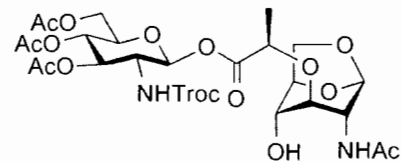

23

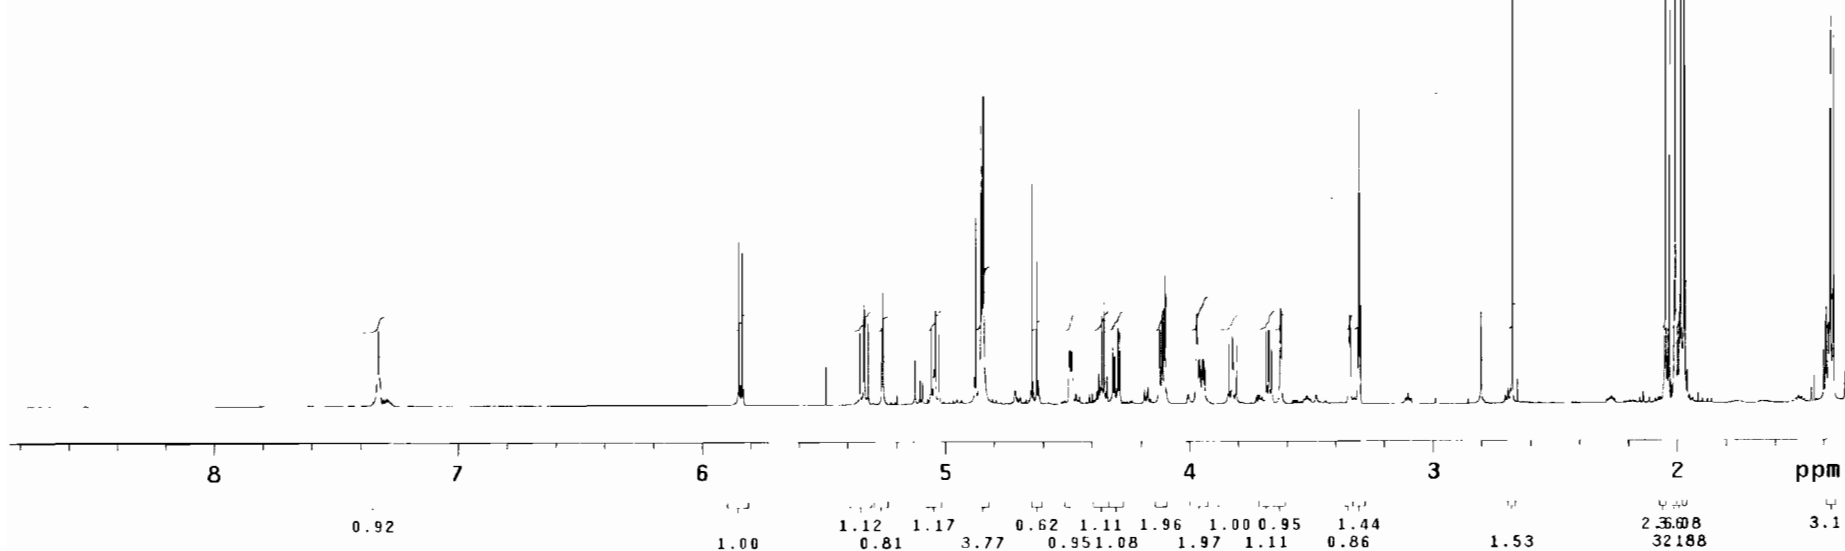

DHL-48\_3

exp2 Carbon

|             |             |            |          |
|-------------|-------------|------------|----------|
| SAMPLE      |             | SPECIAL    |          |
| date        | Feb 17 2008 | temp       | 22.0     |
| solvent     | cd3od       | gain       | not used |
| file        | exp         | spin       | not used |
| ACQUISITION |             | hst        | 0.008    |
| sw          | 36764.7     | pw90       | 7.500    |
| at          | 1.783       | alfa       | 10.000   |
| np          | 131072      | FLAGS      |          |
| fb          | 17000       | il         | n        |
| bs          | 8           | in         | n        |
| dl          | 1.720       | dp         | y        |
| nt          | 2400        | hs         | nn       |
| ct          | 224         | PROCESSING |          |
| tn          | C13         | lb         | 0.50     |
| sfrq        | 150.855     | fn         | 262144   |
| tof         | 1542.6      | sp         | 2279.9   |
| tpwr        | 58          | wp         | 23947.0  |
| pw          | 7.500       | rfl        | 9725.0   |
| DECOUPLER   |             | rfp        | 7413.7   |
| dn          | H1          | rp         | 19.9     |
| dof         | 0           | lp         | 56.1     |
| dm          | yyy         | PLOT       |          |
| dmm         | w           | wc         | 250      |
| dpwr        | 44          | sc         | 0        |
| dmf         | 13908       | vs         | 390      |
|             |             | th         | 7        |
|             |             | ai         | cdc ph   |

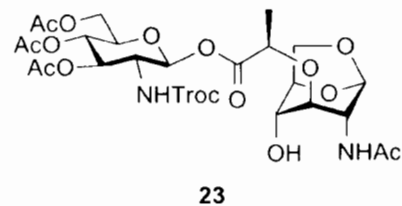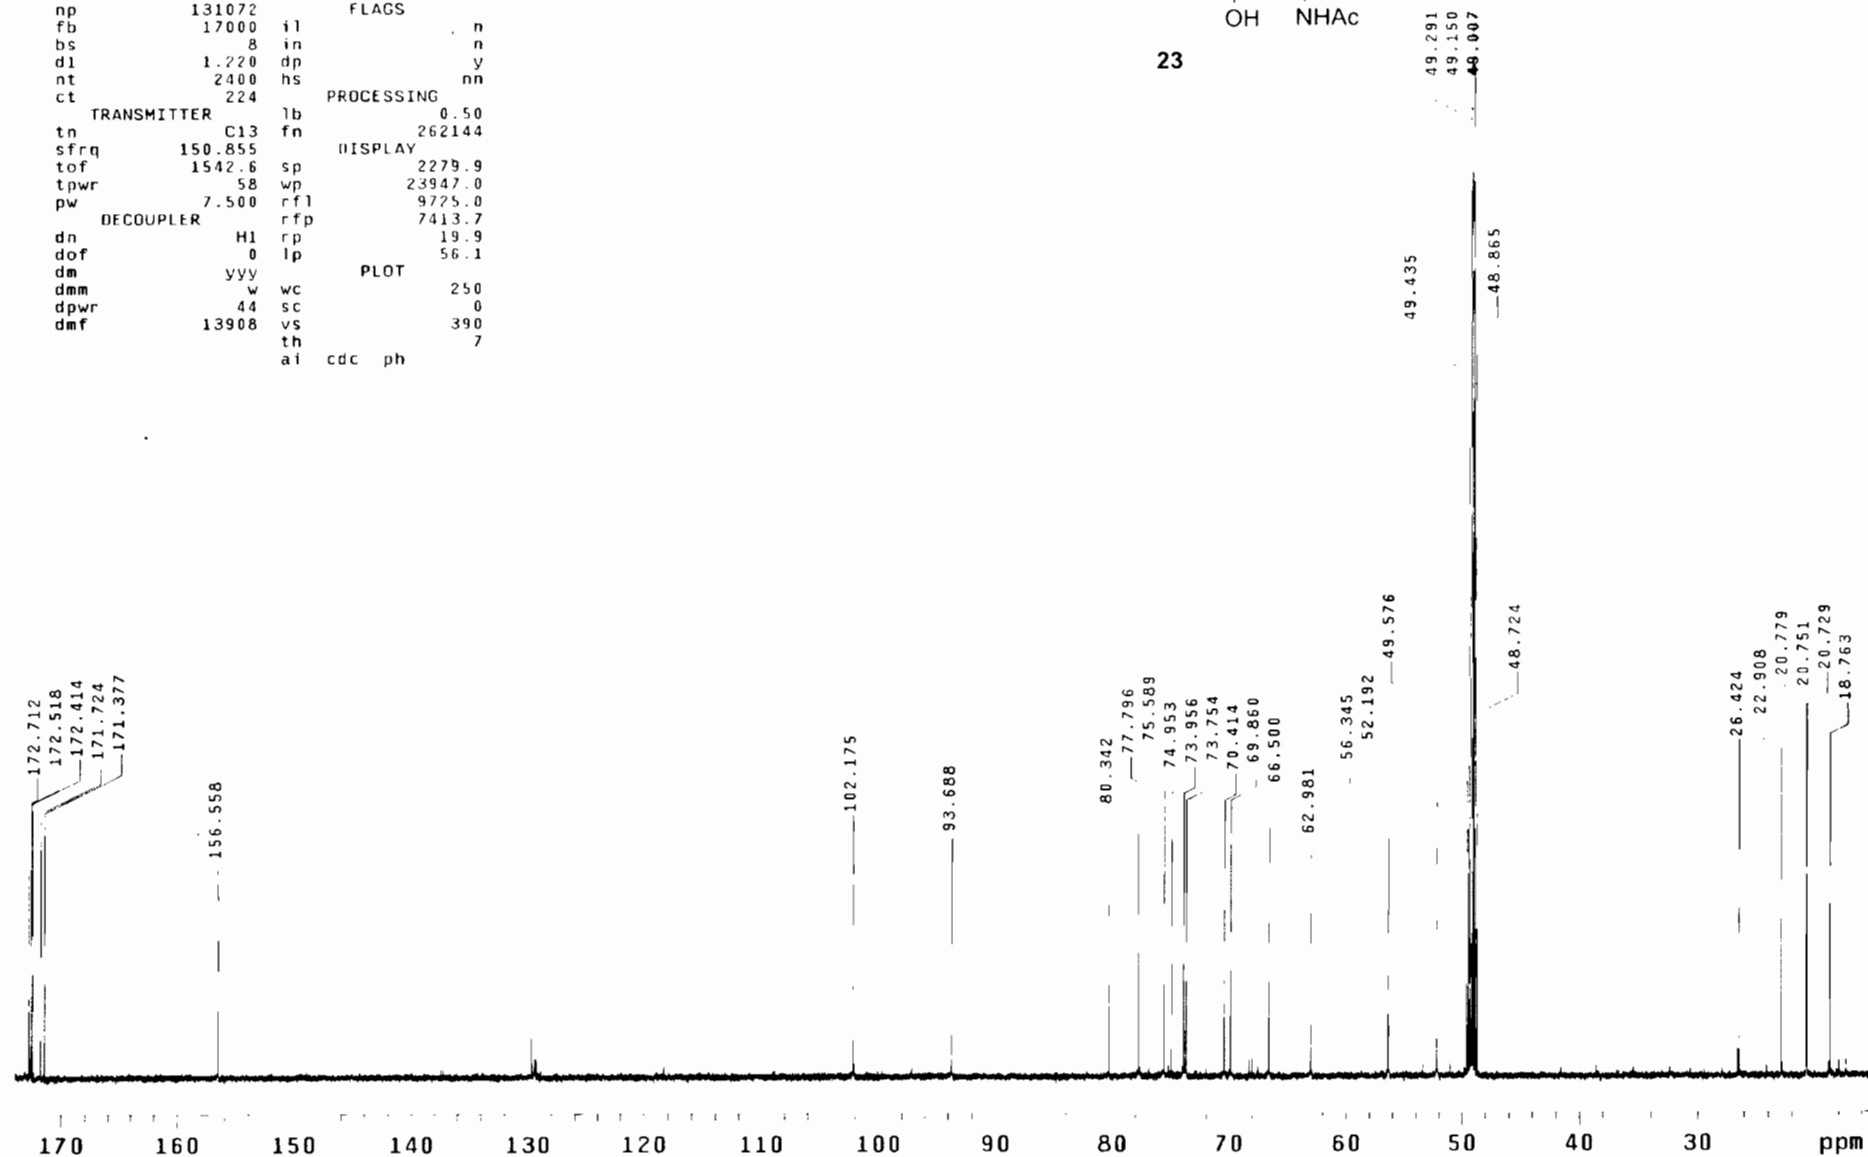

DHL-48\_3

File: xp

Pulse Sequence: DEPT

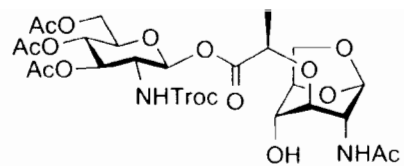

23

CH3 carbons

CH2 carbons

CH carbons

all protons 120 carbons 110 100 90 80 70 60 50 40 30 20 10 ppm

- S105 -

DHL-57

expl Proton

|             |             |            |          |
|-------------|-------------|------------|----------|
| SAMPLE      |             | SPECIAL    |          |
| date        | Mar 26 2008 | temp       | 22.0     |
| solvent     | cdcl3       | gain       | not used |
| file        | exp         | spin       | not used |
| ACQUISITION |             | hst        | 0.008    |
| sw          | 7225.4      | pw90       | 11.100   |
| at          | 3.408       | alfa       | 10.000   |
| np          | 49246       | FLAGS      |          |
| fb          | 4000        | il         | n        |
| bs          | 4           | in         | n        |
| ss          | 2           | dp         | y        |
| dl          | 1.000       | hs         | nn       |
| nt          | 8           | PROCESSING |          |
| ct          | 8           | fn         | 131072   |
| TRANSMITTER |             | DISPLAY    |          |
| tn          | H1          | sp         | -613.3   |
| sfrq        | 599.876     | wp         | 7225.3   |
| tof         | 0           | rfl        | 613.4    |
| tpwr        | 61          | rfp        | 0        |
| pw          | 11.100      | rp         | 143.2    |
| DECOUPLER   |             | lp         | 7.7      |
| dn          | C13         | PLOT       |          |
| do          | 0           | wc         | 250      |
| dm          | nnn         | sc         | 0        |
| dmm         | c           | vs         | 873      |
| dpwr        | 38          | th         | 45       |
| dml         | 35088       | ai         | cdc ph   |

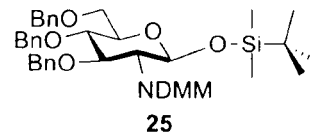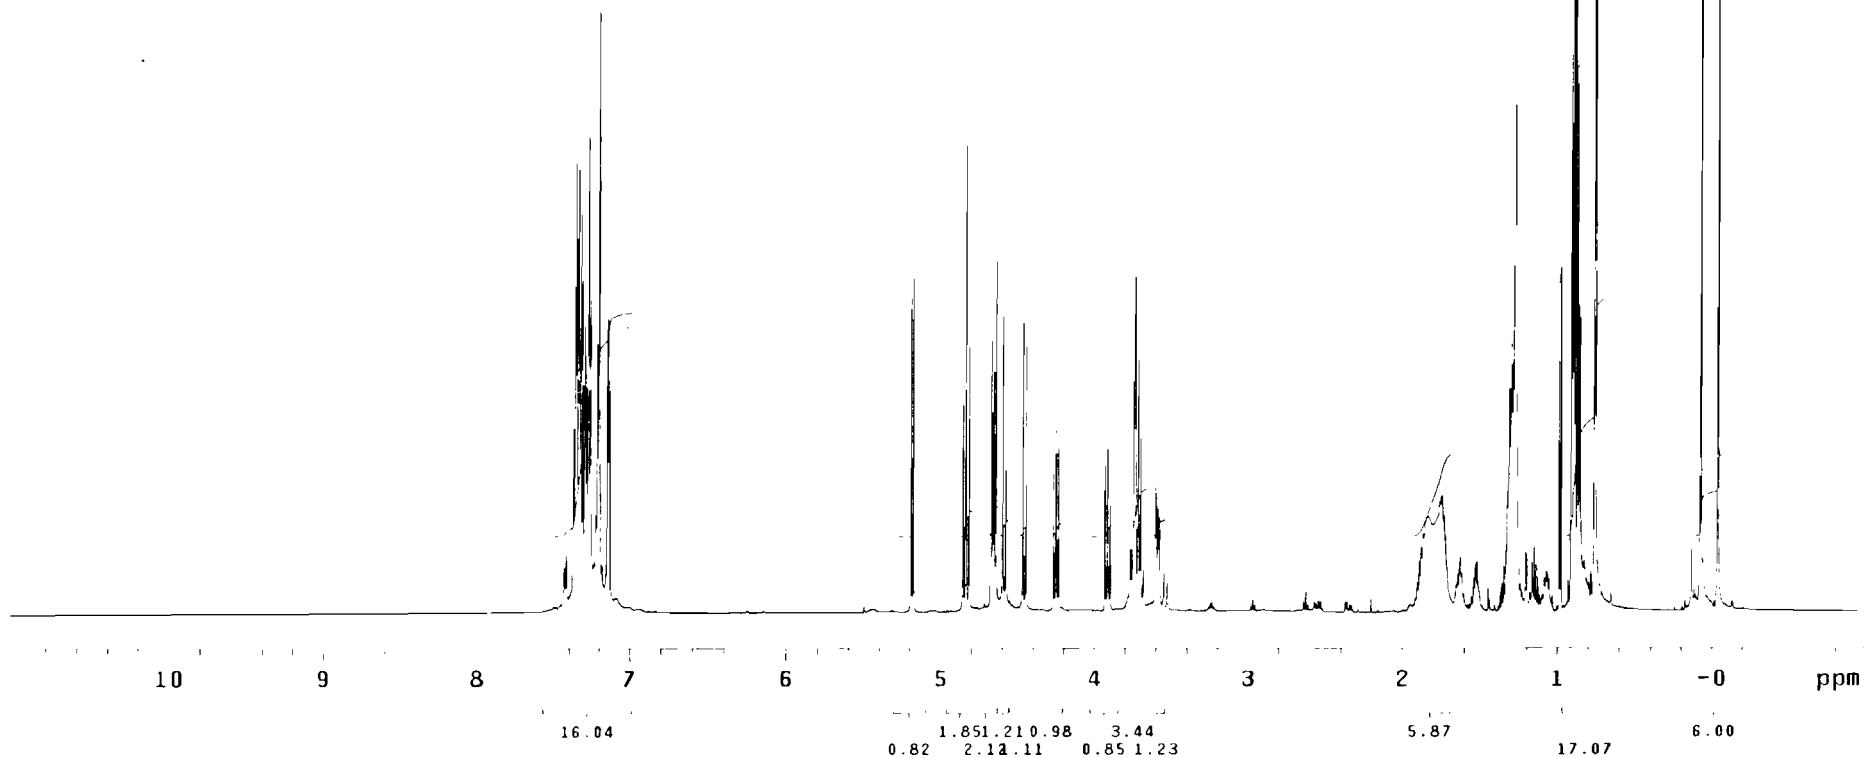

DHL-57

exp2 Carbon

| SAMPLE      |             | SPECIAL    |          |
|-------------|-------------|------------|----------|
| date        | Mar 26 2008 | temp       | 22.0     |
| solvent     | cdcl3       | gain       | not used |
| file        | exp         | spin       | not used |
| ACQUISITION |             |            |          |
| sw          | 30487.8     | hst        | 0.008    |
| at          | 1.783       | pw90       | 7.500    |
| np          | 108694      | alfa       | 10.000   |
| fb          | 17000       | FLAGS      |          |
| bs          | 4           | il         | n        |
| dl          | 1.220       | in         | n        |
| nt          | 256         | dp         | y        |
| ct          | 68          | hs         | nn       |
| TRANSMITTER |             | PROCESSING |          |
| tn          | C13         | lb         | 0.50     |
| sfrq        | 150.852     | fn         | 262144   |
| tof         | -720.0      | DISPLAY    |          |
| tpwr        | 58          | sp         | 1.6      |
| pw          | 7.500       | wp         | 27215.3  |
| DECOUPLER   |             | rfl        | 1668.5   |
| dn          | H1          | rfp        | 0        |
| dof         | 0           | rp         | -128.4   |
| dm          | yvy         | lp         | -4.3     |
| dmm         | w           | PLOT       |          |
| dpwr        | 44          | wc         | 250      |
| dmf         | 13908       | sc         | 0        |
|             |             | vs         | 151      |
|             |             | th         | 5        |
|             |             | ai         | cdc ph   |

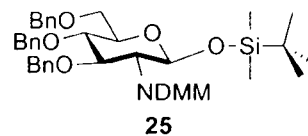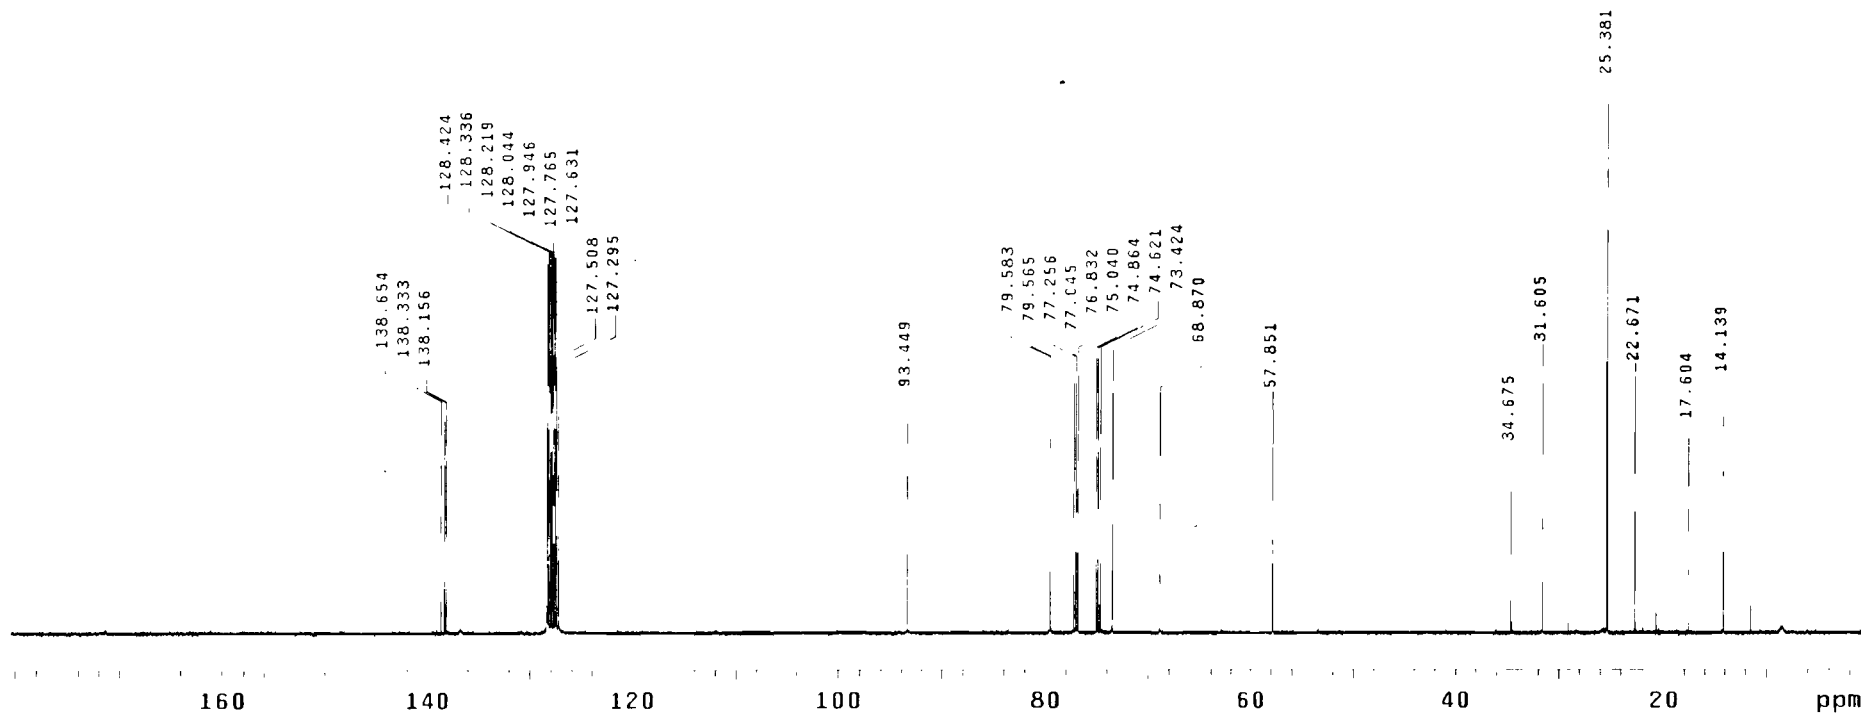

Heteronuclear polarization transfer experiment

File: xp

Pulse Sequence: DEPT

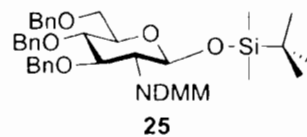

CH3 carbons

CH2 carbons

CH carbons

all protonated carbons

140

120

100

80

60

40

20

0

ppm

DHL-58

exp1 s2pul

| SAMPLE      |            | DEC. & VT  |            |
|-------------|------------|------------|------------|
| date        | Apr 2 2008 | dfrq       | 499.864    |
| solvent     | CDC13      | dn         | H1         |
| file        | exp        | dpwr       | 30         |
| ACQUISITION |            |            |            |
| sfrq        | 499.864    | dm         | nnn        |
| tn          | H1         | dmm        | c          |
| at          | 5.016      | dmf        | 200        |
| np          | 65536      | dseq       |            |
| sw          | 6533.3     | dres       | 1.0        |
| fb          | 4000       | homo       | n          |
| bs          | 4          |            |            |
| tpwr        | 61         | dfrq2      | 0          |
| pw          | 13.5       | dn2        |            |
| d1          | 0.100      | dpwr2      | 1          |
| tof         | 269.9      | dof2       | 0          |
| nt          | 16         | dm2        | n          |
| ct          | 16         | dmm2       | c          |
| alock       | n          | dmf2       | 200        |
| gain        | not used   | dseq2      |            |
|             |            | dres2      | 1.0        |
| il          | n          | homo2      | n          |
| in          | n          |            |            |
| dp          | y          | dfrq3      | 0          |
| hs          | nn         | dn3        |            |
|             |            | dpwr3      | 1          |
| sp          | 682.9      | dof3       | 0          |
| wp          | 4472.7     | dm3        | n          |
| vs          | 194        | dmm3       | c          |
| sc          | 0          | dmf3       | 200        |
| wc          | 250        | dseq3      |            |
| hzmm        | 17.89      | dres3      | 1.0        |
| is          | 100.00     | homo3      | n          |
| rfl         | 510.6      | PROCESSING |            |
| rfp         | 0          | wtfile     |            |
| th          | 7          | proc       | ft         |
| ins         | 15.000     | fn         | 65536      |
| ai          | ph         | math       | f          |
|             |            | werr       |            |
|             |            | wexp       | process pH |
|             |            | wbs        |            |
|             |            | wnt        | wft        |

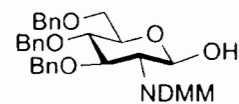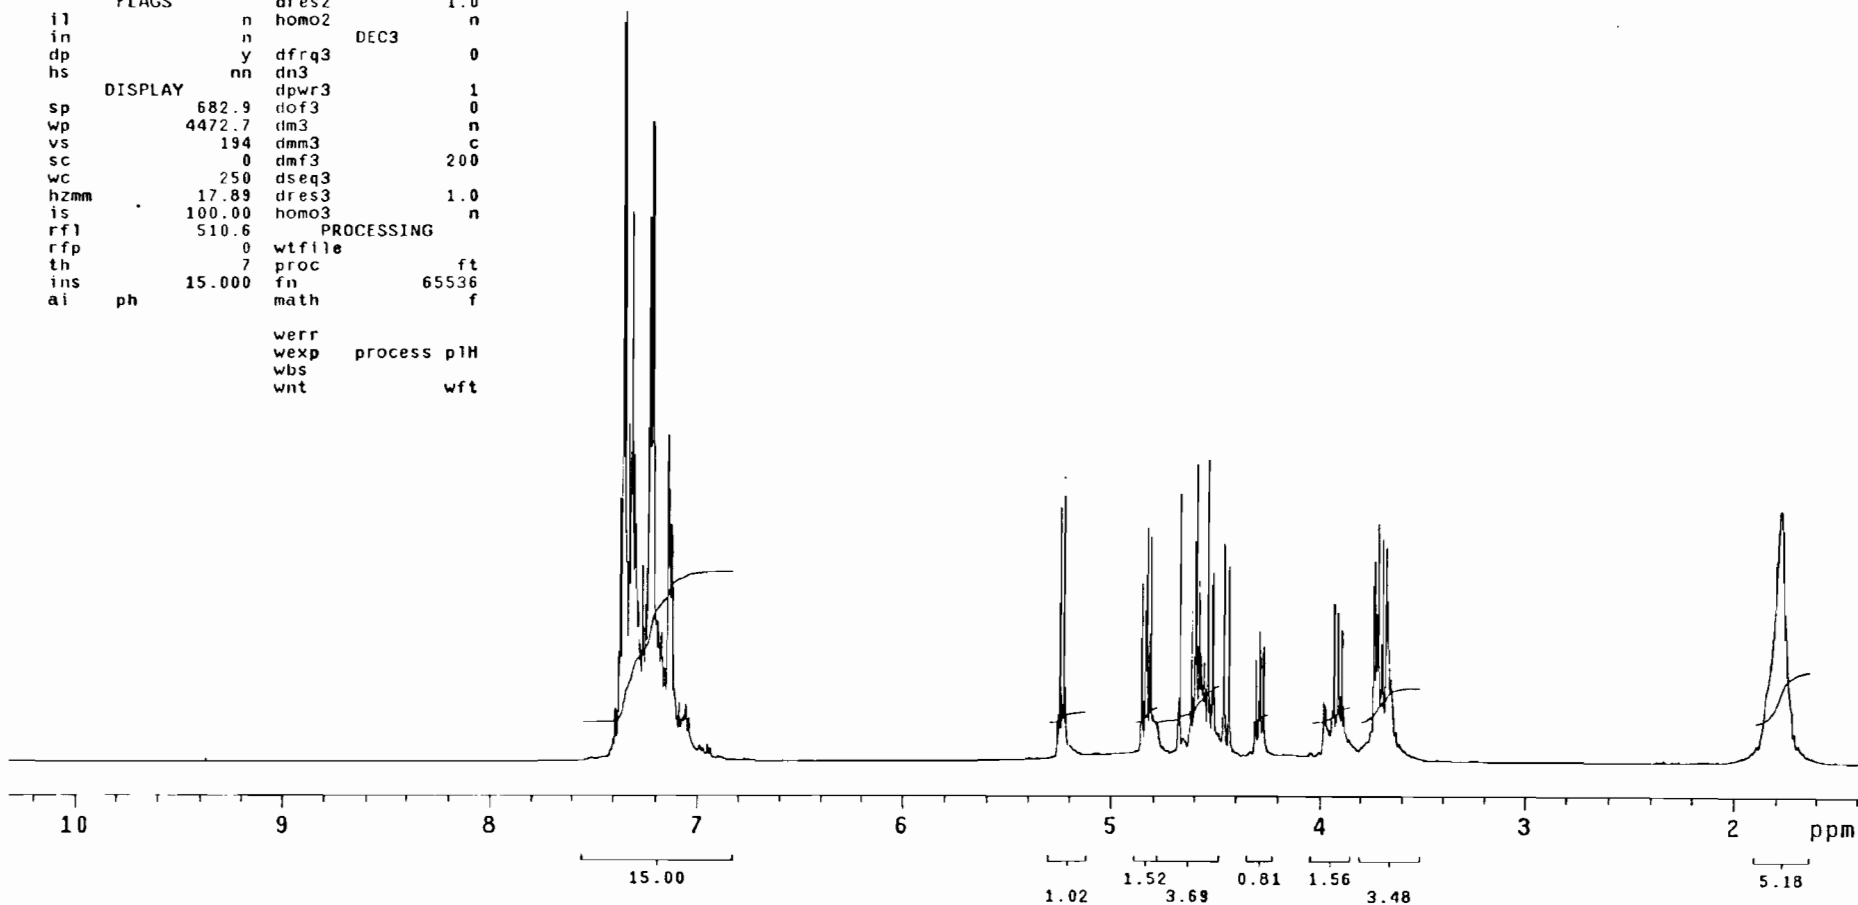

DHL-58

exp2 s2pu1

| SAMPLE      |            | DEC. & VT  |         |
|-------------|------------|------------|---------|
| date        | Apr 2 2008 | dfrq       | 499.864 |
| solvent     | CDC13      | dn         | H1      |
| file        | exp        | dpwr       | 40      |
| ACQUISITION |            |            |         |
| sfrq        | 125.702    | dof        | 0       |
| tn          | C13        | dm         | yyy     |
| at          | 1.215      | dmm        | w       |
| np          | 65536      | dseq       | 8787.35 |
| sw          | 26963.3    | dres       | 1.0     |
| fb          | 15000      | homo       | n       |
| bs          | 4          |            |         |
| tpwr        | 52         | dfrq2      | 0       |
| pw          | 10.2       | dn2        |         |
| dl          | 1.800      | dpwr2      | 1       |
| tof         | 144.5      | dof2       | 0       |
| nt          | 1200       | dm2        | n       |
| ct          | 104        | dmm2       | c       |
| alock       | n          | dmf2       | 10000   |
| gain        | not used   | dseq2      |         |
| FLAGS       |            | dres2      | 1.0     |
| il          | n          | homo2      | n       |
| in          | n          |            |         |
| dp          | y          | dfrq3      |         |
| hs          | nn         | dn3        |         |
| DISPLAY     |            | dpwr3      |         |
| sp          | -59.9      | dof3       |         |
| wp          | 22817.3    | dm3        |         |
| vs          | 122        | dmm3       |         |
| sc          | 0          | dmf3       | 10000   |
| wc          | 250        | dseq3      |         |
| hzmm        | 91.27      | dres3      | 1.0     |
| is          | 500.00     | homo3      | n       |
| rfl         | 1441.5     |            |         |
| rfp         | 0          | PROCESSING |         |
| th          | 6          | lb         | 1.00    |
| ins         | 100.000    | wfile      |         |
| ai          | cdc ph     | proc       | ft      |
|             |            | fn         | 131072  |
|             |            | math       | f       |

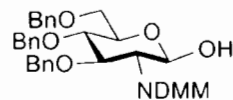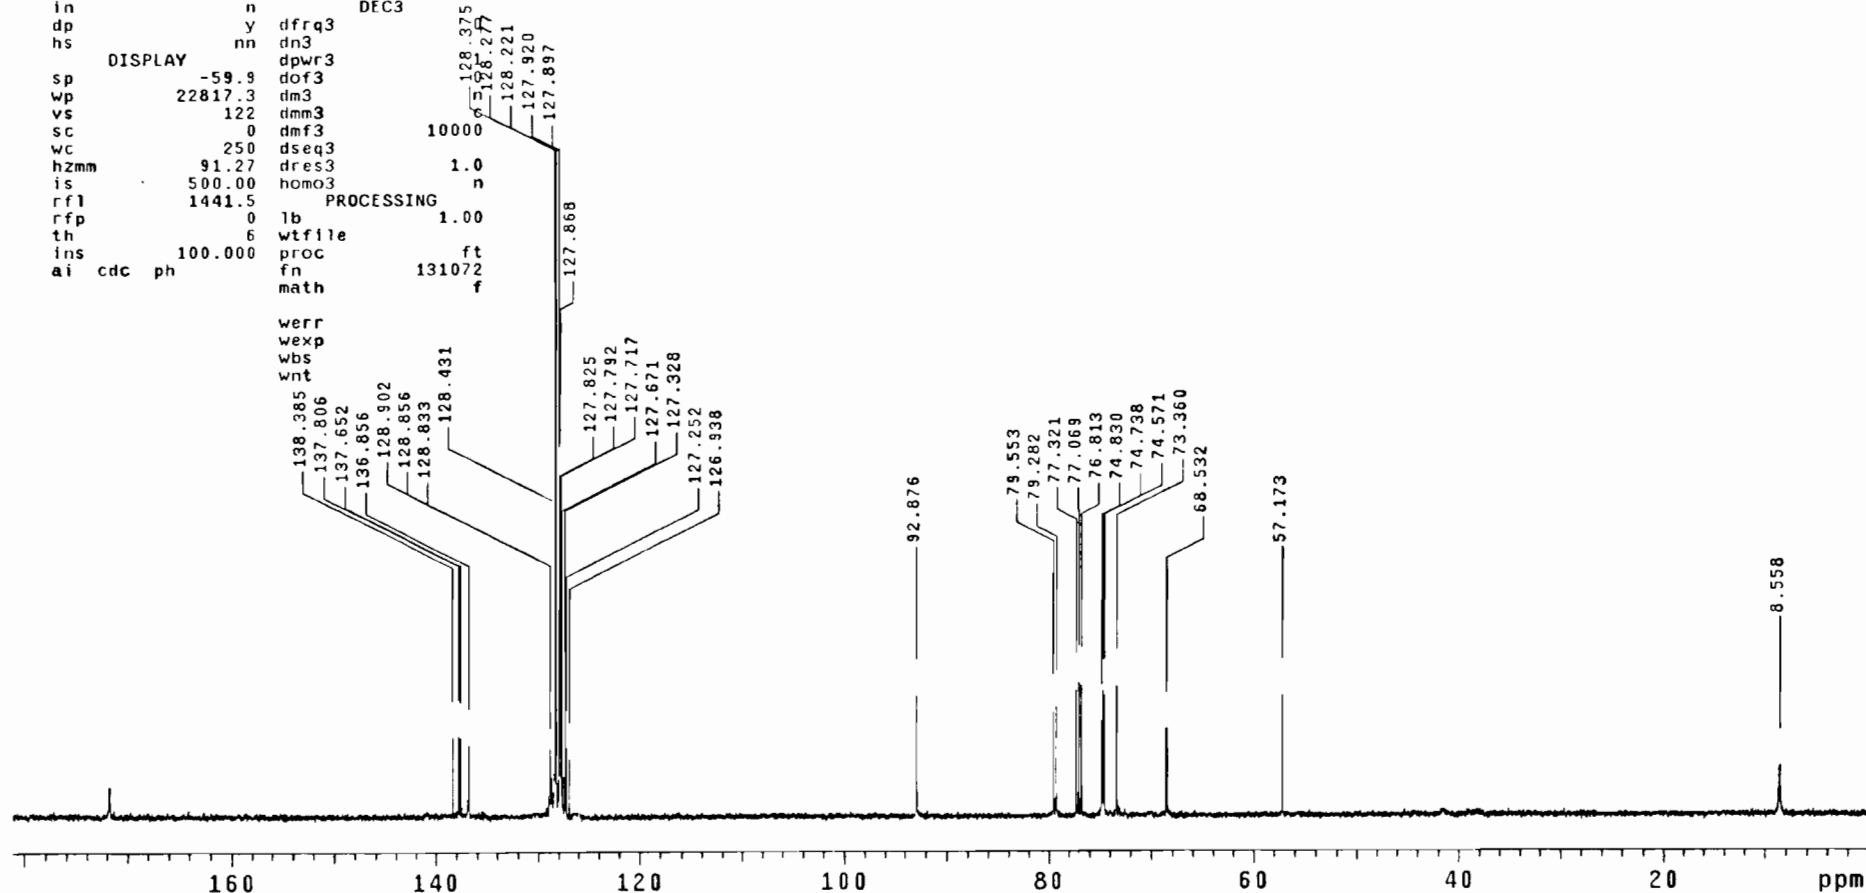

DHL-67

exp1 s2pu1

|             |             |            |            |
|-------------|-------------|------------|------------|
| SAMPLE      |             | DEC & VT   |            |
| date        | Apr 27 2008 | dfi q      | 499.864    |
| solvent     | CDC13       | dn         | H1         |
| file        | exp         | dpwr       | 30         |
| ACQUISITION |             | dof        | 0          |
| sfrq        | 499.864     | dm         | nnn        |
| tn          | H1          | dmm        | C          |
| at          | 5.016       | dmf        | 200        |
| np          | 65536       | dseq       |            |
| sw          | 6533.3      | dres       | 1.0        |
| fb          | 4000        | homo       | n          |
| bs          | 4           | DEC2       |            |
| tpwr        | 61          | dfi q2     | 0          |
| pw          | 13.5        | dn2        |            |
| d1          | 0.100       | dpwr2      | 1          |
| tof         | 269.9       | dof2       | 0          |
| nt          | 16          | dm2        | n          |
| ct          | 16          | dmm2       | C          |
| alock       | n           | dmf2       | 200        |
| gain        | not used    | dseq2      |            |
| FLAGS       |             | dres2      | 1.0        |
| il          | n           | homo2      | n          |
| in          | n           | DEC3       |            |
| dp          | y           | dfi q3     | 0          |
| hs          | nn          | dn3        |            |
| DISPLAY     |             | dpwr3      | 1          |
| sp          | -510.4      | dof3       | 0          |
| wp          | 6533.1      | dm3        | n          |
| vs          | 210         | dmm3       | C          |
| sc          | 0           | dmf3       | 200        |
| wc          | 250         | dseq3      |            |
| hzmm        | 26.13       | dres3      | 1.0        |
| is          | 225.00      | homo3      | n          |
| rfl         | 510.6       | PROCESSING |            |
| rfp         | 0           | wtfile     |            |
| th          | 7           | proc       | ft         |
| ins         | 6.000       | fn         | 65536      |
| ai          | ph          | math       | f          |
|             |             | werr       |            |
|             |             | wexp       | process pH |
|             |             | wls        |            |
|             |             | wnt        | wft        |

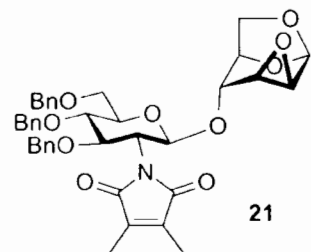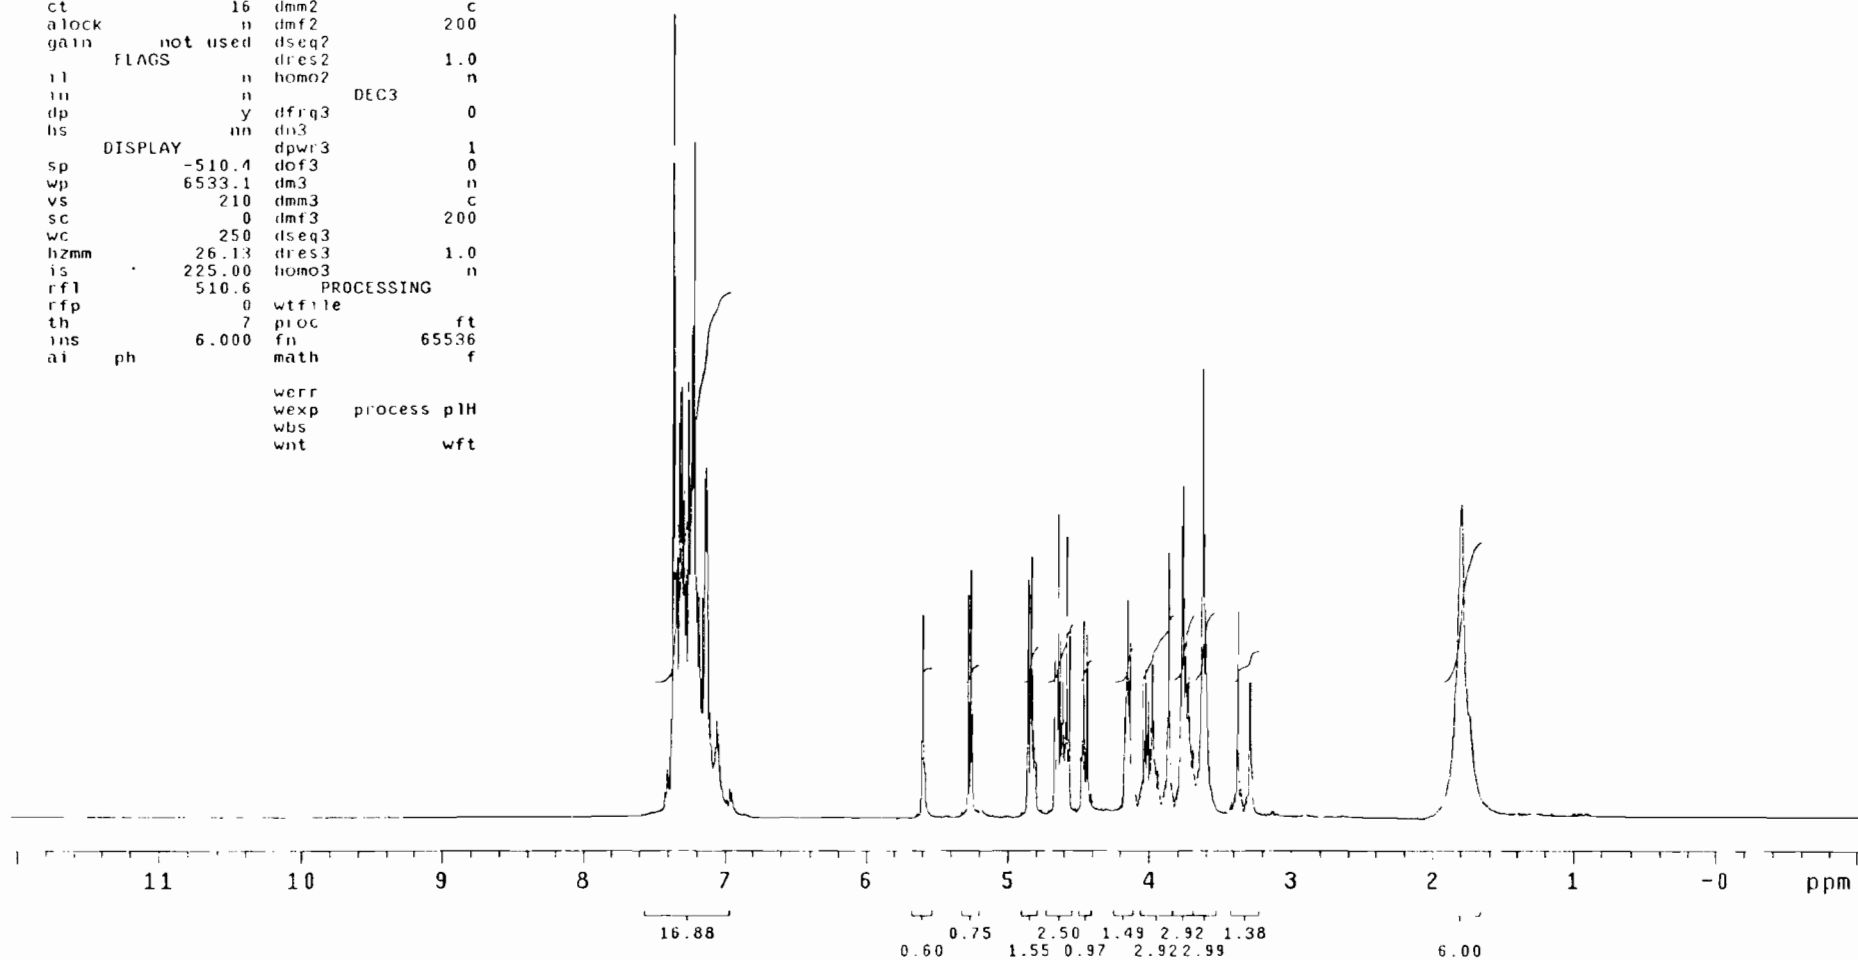

DHL 6.7

exp2 52pul

|             |             |           |         |
|-------------|-------------|-----------|---------|
| SAMPLE      |             | DEC. & VT |         |
| date        | Apr 27 2008 | dfrq      | 499.864 |
| solvent     | CDC13       | dn        | H1      |
| file        | exp         | dpwr      | 40      |
| ACQUISITION |             | dof       | 0       |
| sfrq        | 125.702     | dm        | VVY     |
| tn          | C13         | dmm       | W       |
| at          | 1.215       | dmf       | 8787.35 |
| np          | 65536       | dseq      |         |
| sw          | 26963.3     | dres      | 1.0     |
| fb          | 15000       | homo      | n       |
| bs          | 4           | DEC2      |         |
| tpwr        | 52          | dfrq2     | 0       |
| pw          | 10.2        | dn2       |         |
| d1          | 1.800       | dpwr2     | 1       |
| tof         | 144.5       | dof2      | 0       |
| nt          | 18000       | dm2       | n       |
| ct          | 108         | dmm2      | C       |
| alock       | n           | dmf2      | 10000   |
| gain        | not used    | dseq2     |         |
| FLAGS       |             | dres2     | 1.0     |
| il          | n           | homo2     | n       |
| in          | n           | DEC3      |         |
| dp          | y           | dfrq3     | 0       |
| hs          | nm          | dn3       |         |
| DISPLAY     |             | dpwr3     | 1       |
| sp          | 589.3       | dof3      | 0       |
| wp          | 21718.8     | dm3       | n       |
| vs          | 210         | dmm3      | C       |
| sc          | 0           | dmf3      |         |
| wc          | 250         | dseq3     |         |
| hzmm        | 86.88       | dres3     |         |
| is          | 500.00      | homo3     |         |
| rfl         | 1395.0      | PROC      |         |
| rfp         | 0           | ib        |         |
| th          | 5           | wtfile    |         |
| ins         | 100.000     | proc      |         |
| ai          | cdc ph      | fn        |         |
|             |             | math      |         |

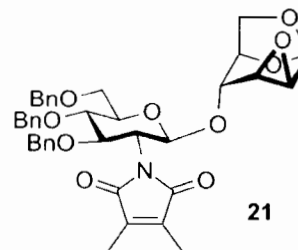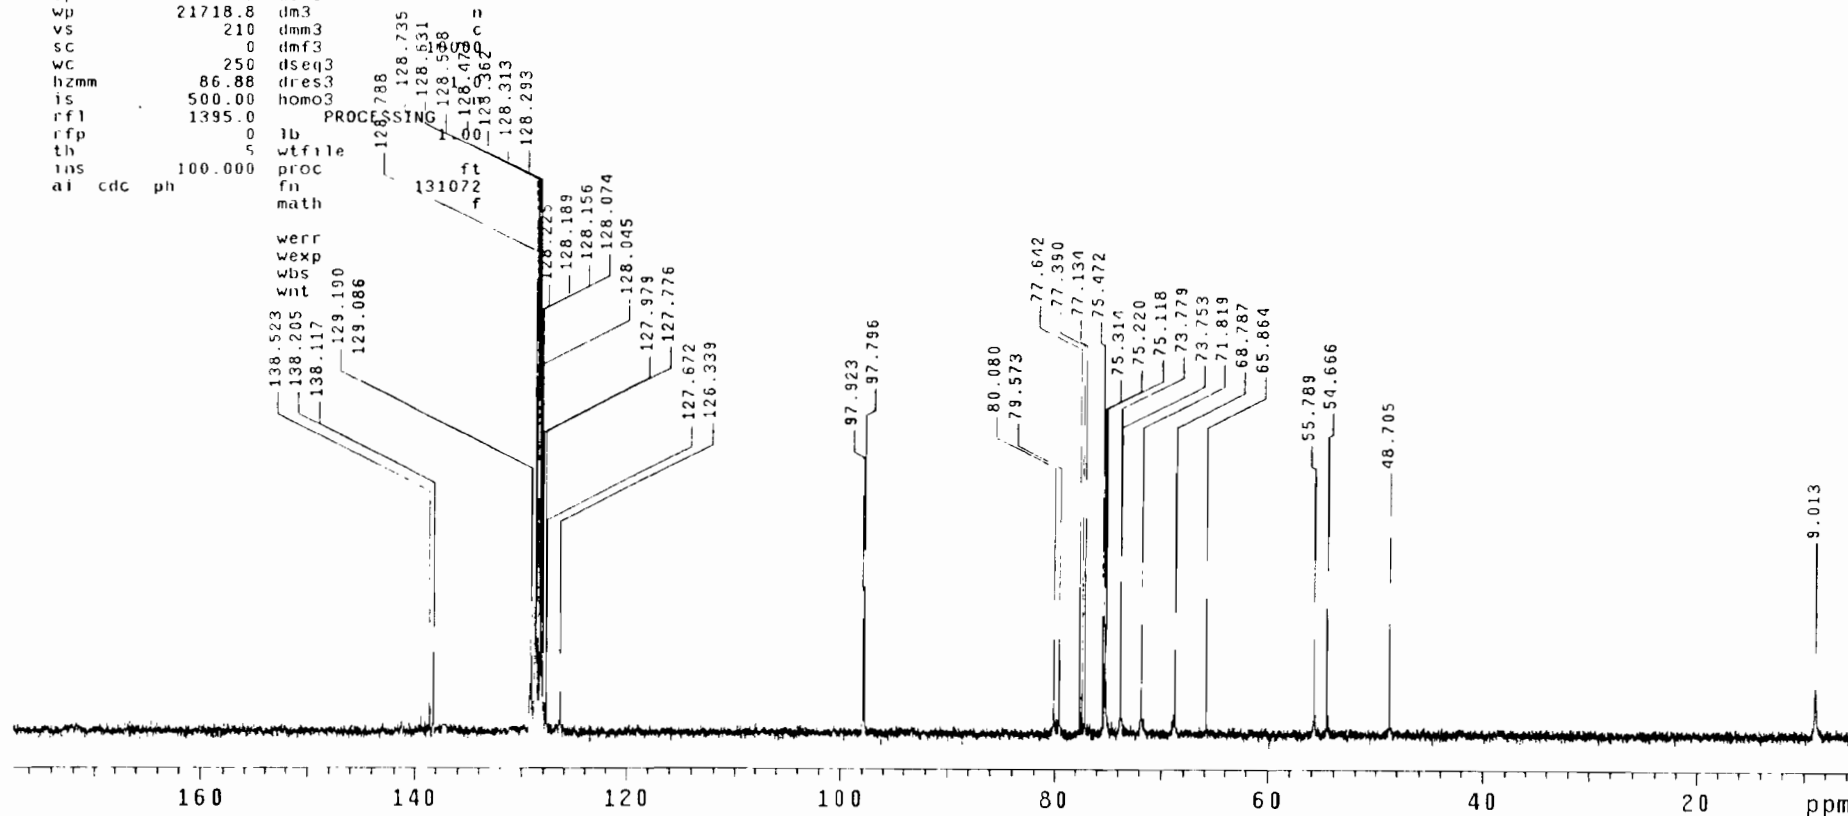

DHL-67

Pulse Sequence: dept

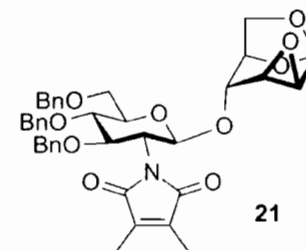

CH3 carbons

CH2 carbons

CH carbons

all protonated carbons

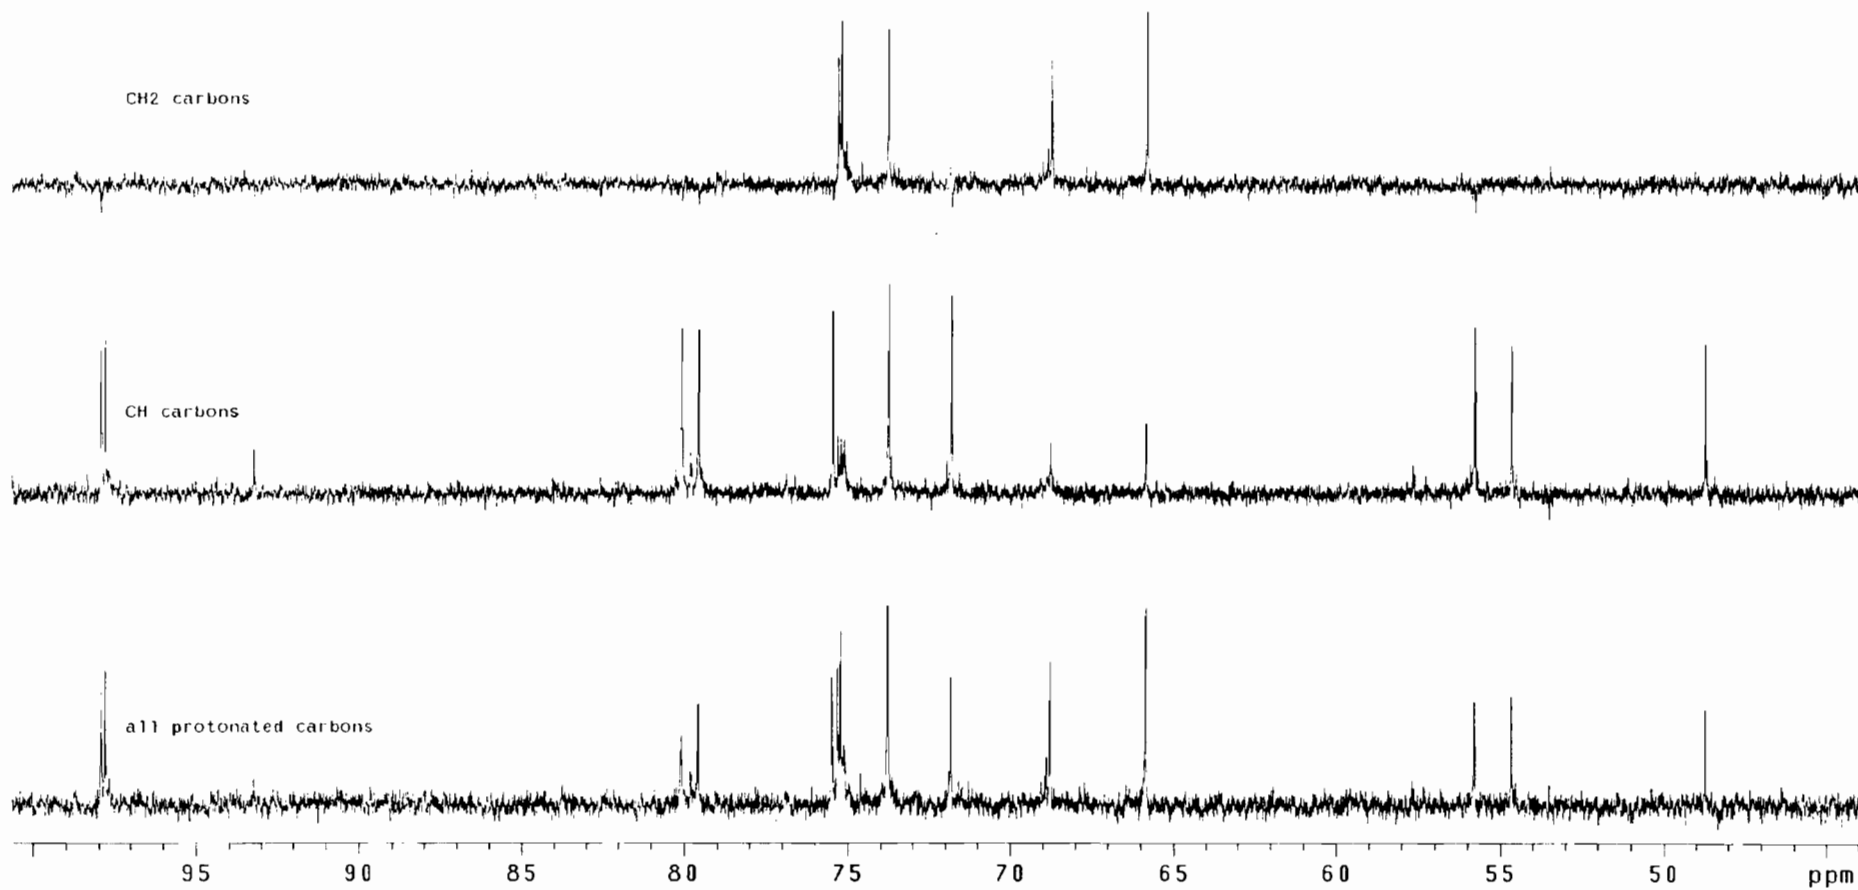

DHL-68\_1

exp1 s2pu1

| SAMPLE      |             | DEC. & VT  |             |
|-------------|-------------|------------|-------------|
| date        | May 18 2008 | dfrq       | 499.864     |
| solvent     | CDC13       | dn         | H1          |
| file        | exp         | dpwr       | 0           |
| ACQUISITION |             | dof        | 0           |
| sfrq        | 499.864     | dm         | nnn         |
| tn          | H1          | dmm        | c           |
| at          | 5.016       | dmf        | 200         |
| np          | 65536       | dseq       |             |
| sw          | 6543.3      | dres       | 1.0         |
| fb          | 4000        | homo       | n           |
| bs          | 4           | DEC2       |             |
| tpwr        | 61          | dfrq2      | 0           |
| pw          | 13.5        | dn2        |             |
| d1          | 0.100       | dpwr2      | 1           |
| tof         | 269.9       | dof2       | 0           |
| nt          | 32          | dm2        | n           |
| ct          | 32          | dmm2       | c           |
| alock       | n           | dmf2       | 200         |
| gain        | not used    | dseq2      |             |
| FLAGS       |             | dres2      | 1.0         |
| it          | n           | homo2      | n           |
| in          | n           | DEC3       |             |
| dp          | y           | dfrq3      | 0           |
| hs          | nn          | dn3        |             |
| DISPLAY     |             | dpwr3      | 1           |
| sp          | 502.5       | dof3       | 0           |
| wp          | 4996.3      | dm3        | n           |
| vs          | 203         | dmm3       | c           |
| sc          | 0           | dmf3       | 200         |
| wc          | 250         | dseq3      |             |
| hzmm        | 19.99       | dres3      | 1.0         |
| is          | 100.00      | homo3      | n           |
| rfl         | 510.6       | PROCESSING |             |
| rfp         | 0           | wfile      |             |
| th          | 7           | proc       | ft          |
| ins         | 6.000       | fn         | 65536       |
| al          | ph          | math       | f           |
|             |             | werr       |             |
|             |             | wexp       | process p1H |
|             |             | wbs        |             |
|             |             | wnt        | wft         |

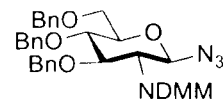

27

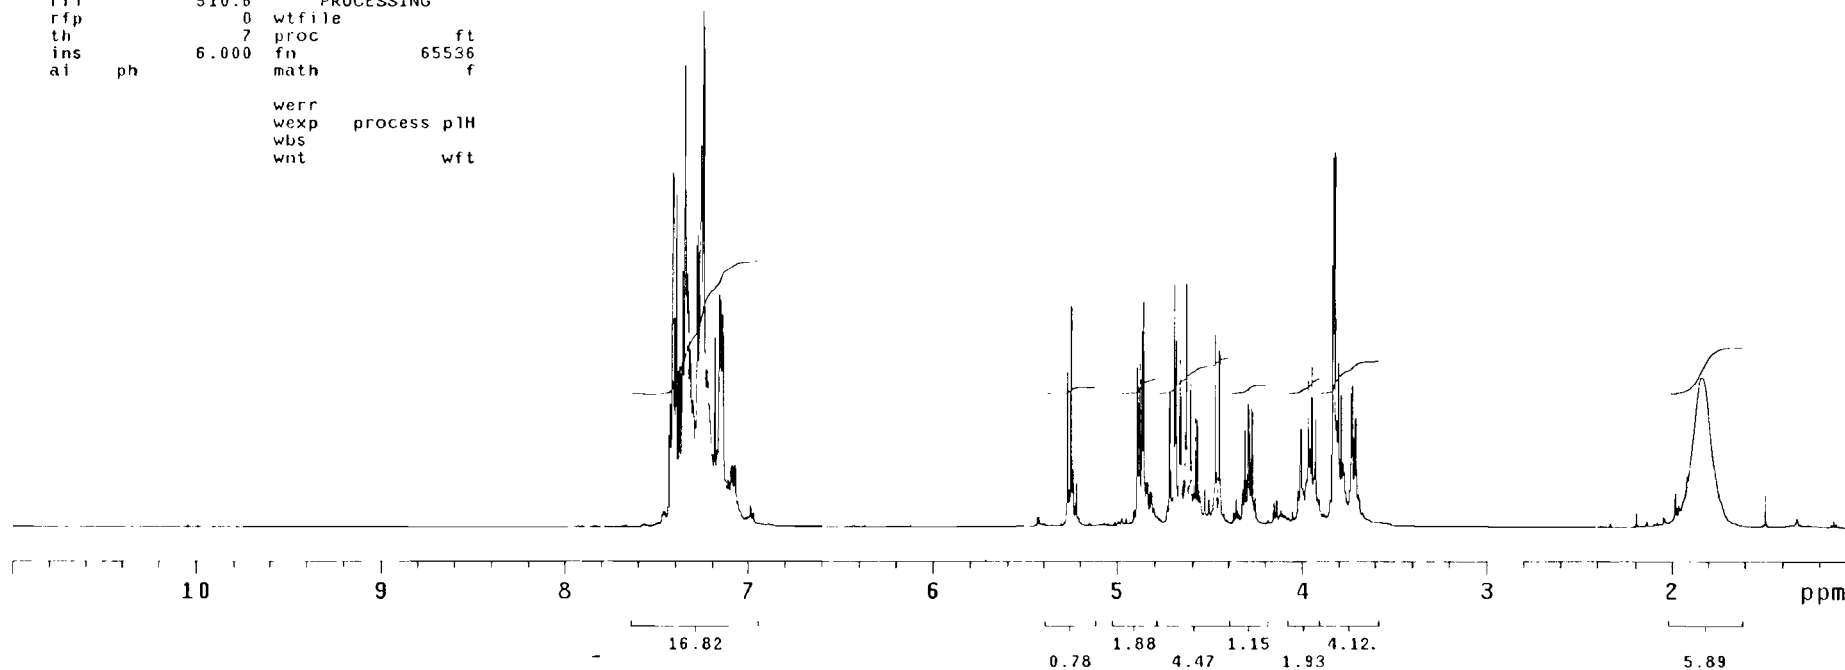

DHL-68\_1

exp? s2pul

| SAMPLE      |             | DEC. & VT |         |
|-------------|-------------|-----------|---------|
| date        | May 18 2008 | dfrq      | 499.864 |
| solvent     | CDCl3       | dn        | H1      |
| file        | exp         | dpwr      | 40      |
| ACQUISITION |             |           |         |
| sfrq        | 125.702     | dof       | 0       |
| tn          | C13         | dmm       | yyy     |
| at          | 1.215       | dmf       | 8787.35 |
| np          | 65536       | dseq      |         |
| sw          | 26963.3     | dres      | 1.0     |
| fb          | 15000       | homo      | n       |
| bs          | 4           | DEC2      |         |
| tpwr        | 52          | dfrq2     | 0       |
| pw          | 10.2        | dn2       |         |
| d1          | 1.800       | dpwr2     | 1       |
| tof         | 144.5       | dof2      | 0       |
| nt          | 10000       | dm2       | n       |
| ct          | 64          | dmm2      | c       |
| alock       | n           | dmf2      | 10000   |
| gain        | not used    | dseq2     |         |
| FLAGS       |             | dres2     | 1.0     |
| il          | n           | homo2     | n       |
| in          | n           | DEC3      |         |
| dp          | y           | dfrq3     | 0       |
| hs          | nn          | dn3       |         |
| DISPLAY     |             |           |         |
| sp          | 756.1       | dpwr3     | 1       |
| wp          | 22675.4     | dof3      | 0       |
| vs          | 145         | dm3       | n       |
| sc          | 0           | dmm3      | c       |
| wc          | 250         | dmf3      | 10000   |
| hzmm        | 90.70       | dseq3     |         |
| is          | 500.00      | dres3     | 1.0     |
| rfl         | 1405.6      | homo3     | n       |
| PROCESSING  |             |           |         |
| rft         | 0           | lb        | 1.00    |
| th          | 4           | wtfile    |         |
| ins         | 100.000     | proc      | ft      |
| al cdc ph   |             | fn        | 131072  |
|             |             | math      | f       |

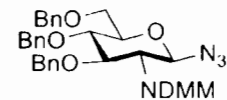

27

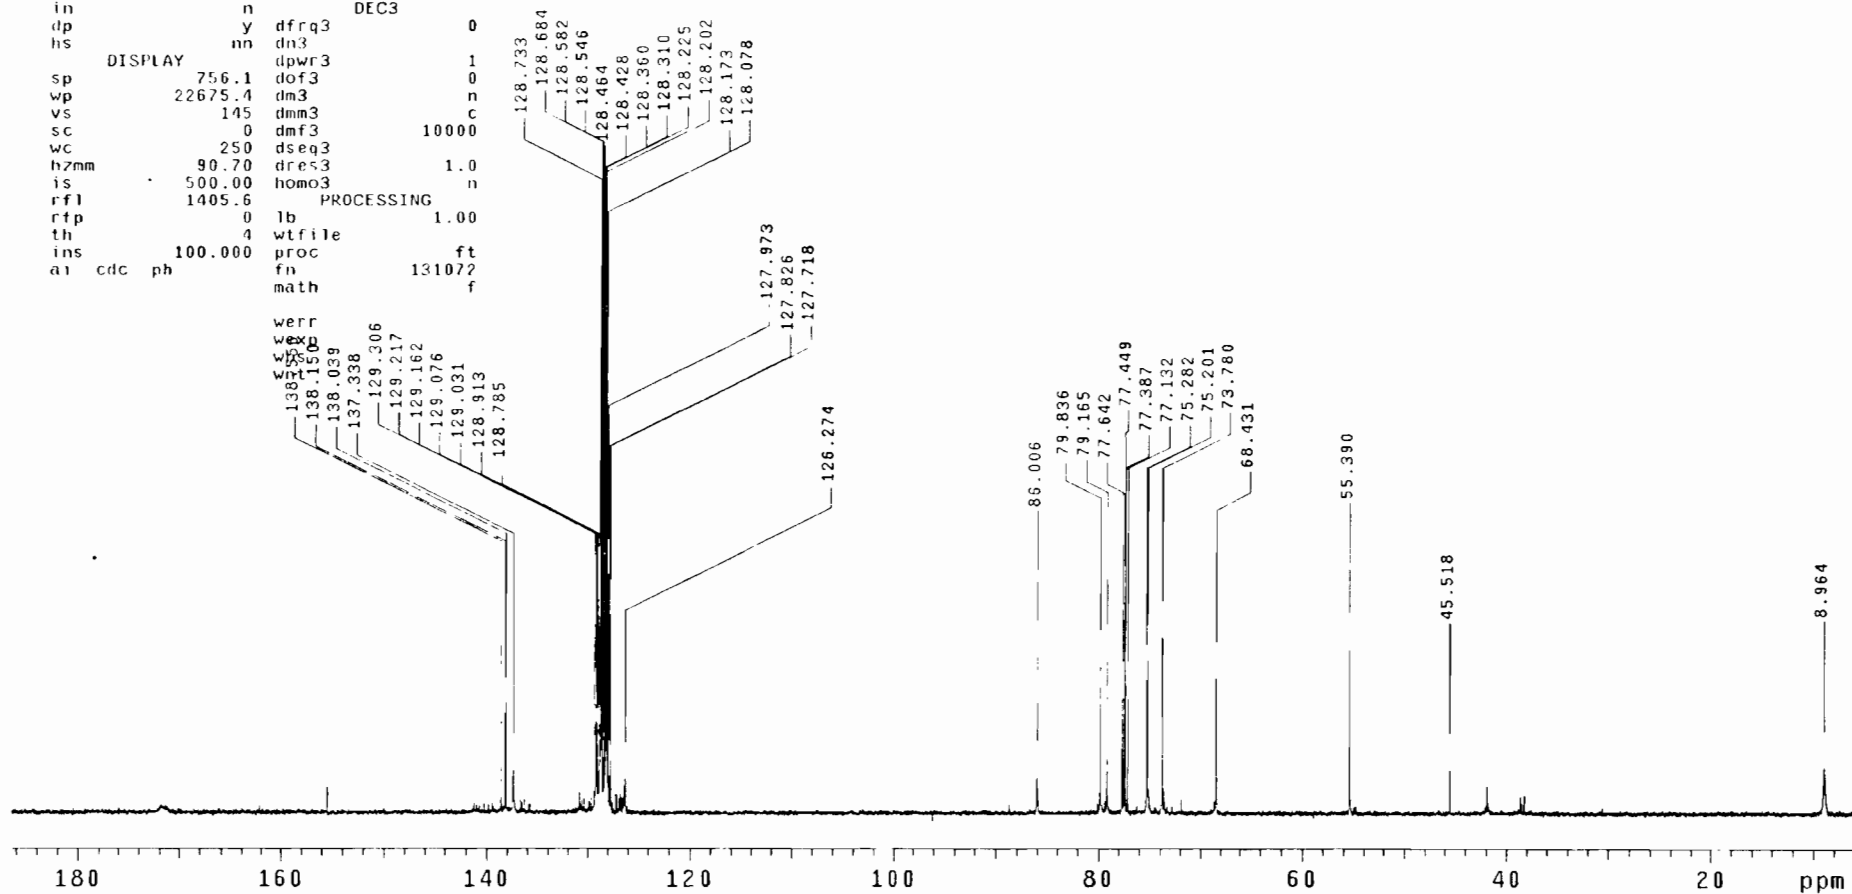

DHL-68\_1

Pulse Sequence: dept

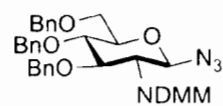

27

CH3 carbons

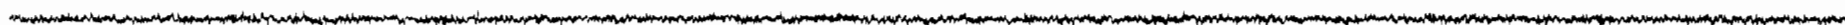

CH2 carbons

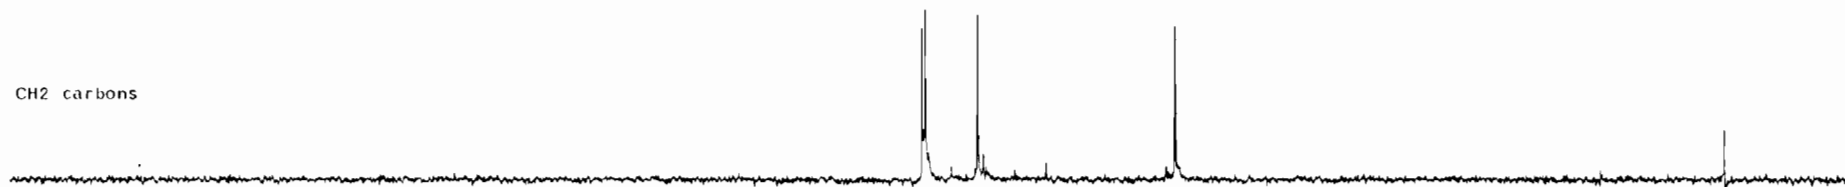

CH carbons

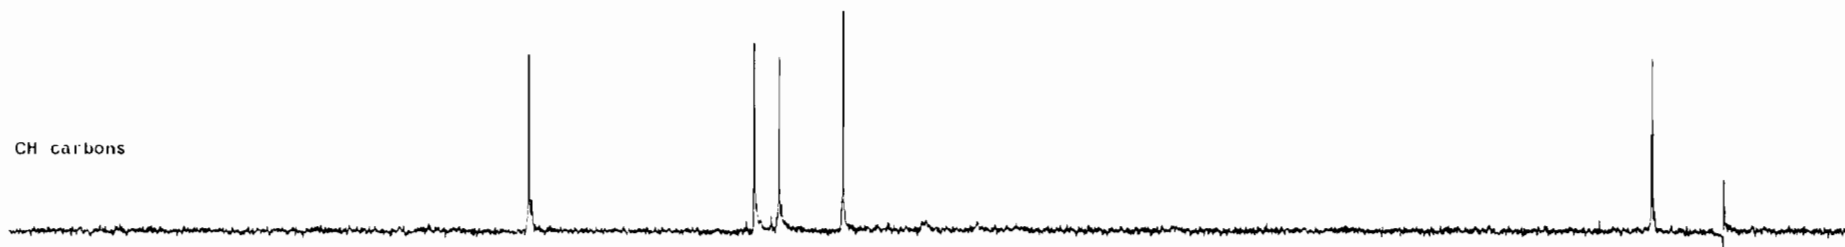

all protonated carbons

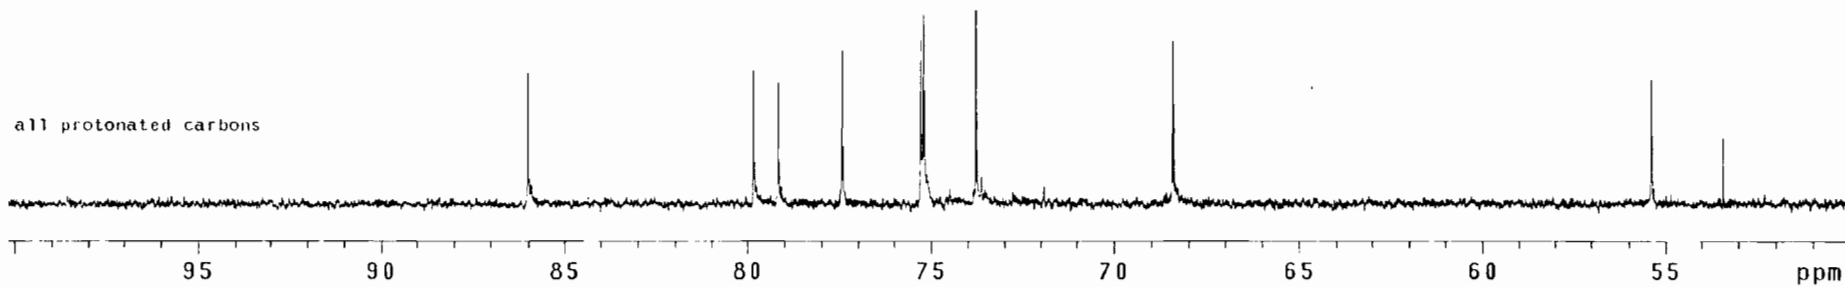

DHL-68\_3

exp3 s2pu1

| SAMPLE      |             | DEC. & VT  |             |
|-------------|-------------|------------|-------------|
| date        | May 14 2008 | dfrq       | 299.948     |
| solvent     | cdcl3       | dn         | H1          |
| file        | exp         | dpwr       | 30          |
| ACQUISITION |             | dof        | 0           |
| sfrq        | 299.949     | dm         | nnn         |
| tn          | H1          | dmm        | c           |
| at          | 3.620       | dmf        | 200         |
| np          | 32768       | dseq       |             |
| sw          | 4525.4      | dres       | 1.0         |
| fb          | 2600        | homo       | n           |
| bs          | 4           | PROCESSING |             |
| tpwr        | 59          | wtfile     |             |
| pw          | 14.0        | proc       | ft          |
| d1          | 0.380       | fn         | 65536       |
| tof         | 481.6       | math       | f           |
| nt          | 16          |            |             |
| ct          | 16          | werr       |             |
| alock       | n           | wexp       | process p1H |
| gain        | not used    | wbs        |             |
|             | FLAGS       | wnt        |             |
| il          | n           |            |             |
| in          | n           |            |             |
| dp          | y           |            |             |
| hs          | nn          |            |             |
| DISPLAY     |             |            |             |
| sp          | -6.4        |            |             |
| wp          | 3597.6      |            |             |
| vs          | 76          |            |             |
| sc          | 0           |            |             |
| wc          | 250         |            |             |
| hzmm        | 14.39       |            |             |
| is          | 81.27       |            |             |
| rfl         | 309.5       |            |             |
| rfp         | 0           |            |             |
| th          | 62          |            |             |
| ins         | 6.000       |            |             |
| nm          | cdc ph      |            |             |

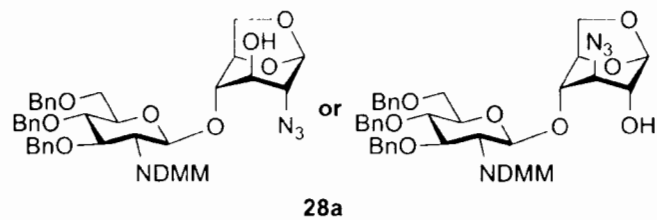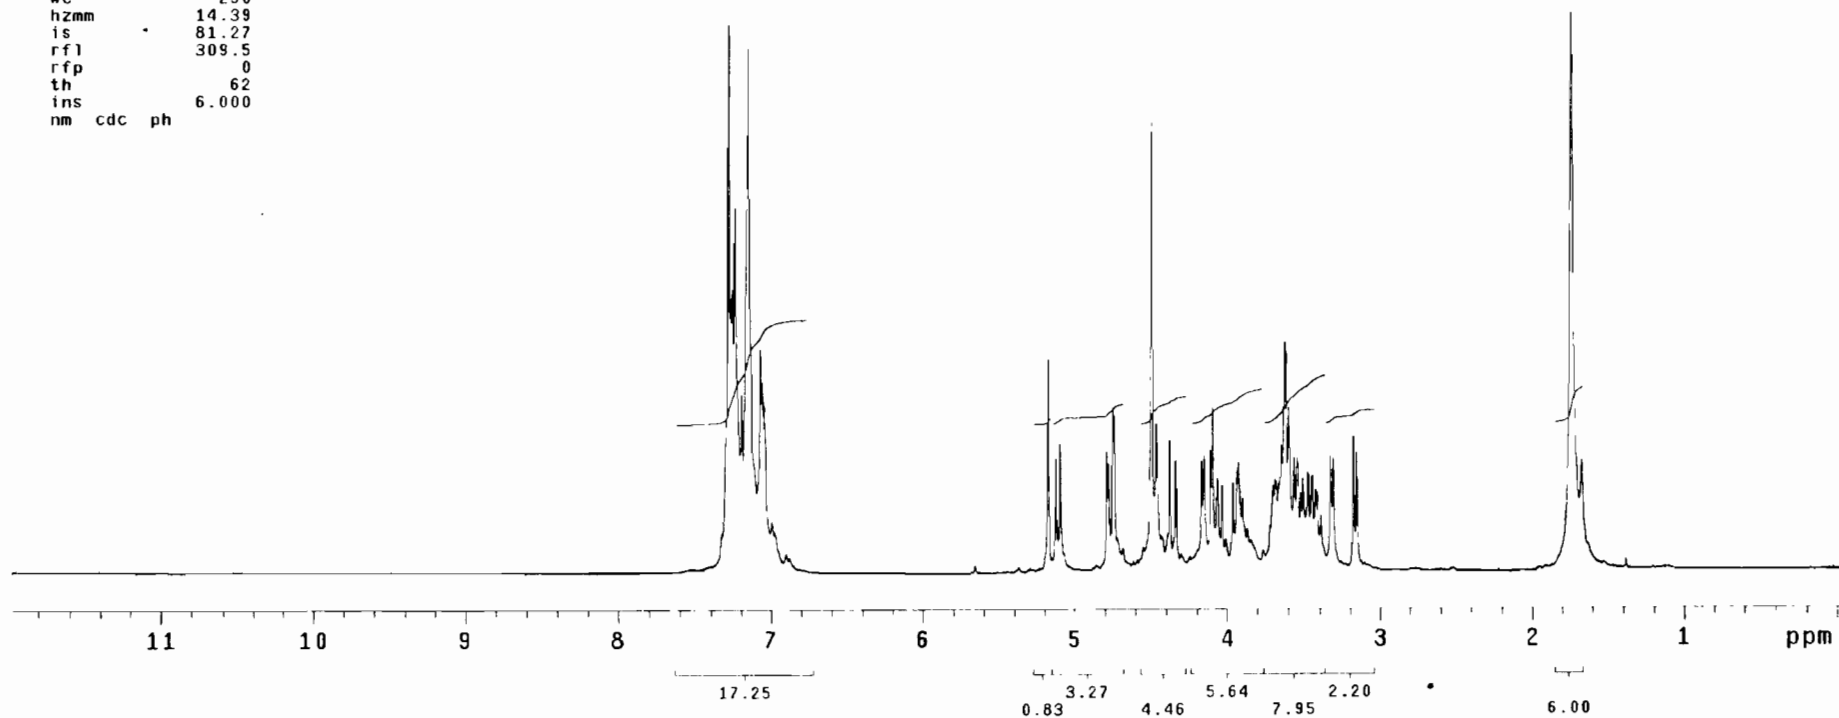

DHL-68\_3

exp4 s2pu1

| SAMPLE      |             | DEC. & VT  |             |
|-------------|-------------|------------|-------------|
| date        | May 14 2008 | dfrq       | 299.949     |
| solvent     | CDC13       | dn         | H1          |
| file        | exp         | dpwr       | 40          |
| ACQUISITION |             | dof        | 272.7       |
| sfrq        | 75.429      | dm         | YYY         |
| tn          | C13         | dmm        | w           |
| at          | 0.957       | dmd        | 8033        |
| np          | 32768       | dseq       |             |
| sw          | 17116.0     | dres       | 1.0         |
| fb          | 9400        | homo       | n           |
| bs          | 4           | PROCESSING |             |
| tpwr        | 59          | lb         | 1.00        |
| pw          | 8.3         | wtfile     |             |
| d1          | 2.000       | proc       | ft          |
| tof         | 0           | fn         | 65536       |
| nt          | 640         | math       | f           |
| ct          | 196         |            |             |
| alock       | n           | werr       |             |
| gain        | not used    | wexp       | process p1C |
| FLAGS       |             | wbs        | wft         |
| il          | n           | wnt        |             |
| in          | n           |            |             |
| dp          | y           |            |             |
| hs          | nn          |            |             |
| DISPLAY     |             |            |             |
| sp          | 5.8         |            |             |
| wp          | 13561.9     |            |             |
| vs          | 44          |            |             |
| sc          | 0           |            |             |
| wc          | 250         |            |             |
| hzmm        | 54.25       |            |             |
| is          | 500.00      |            |             |
| rfl         | 6830.8      |            |             |
| rfp         | 5824.8      |            |             |
| th          | 5           |            |             |
| ins         | 100.000     |            |             |
| nm          | cdc         | ph         |             |

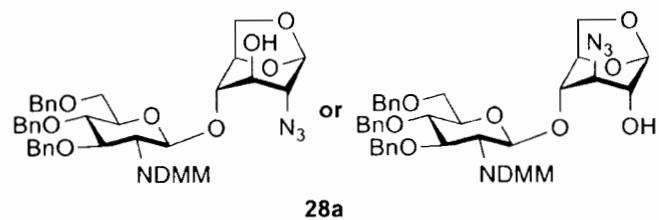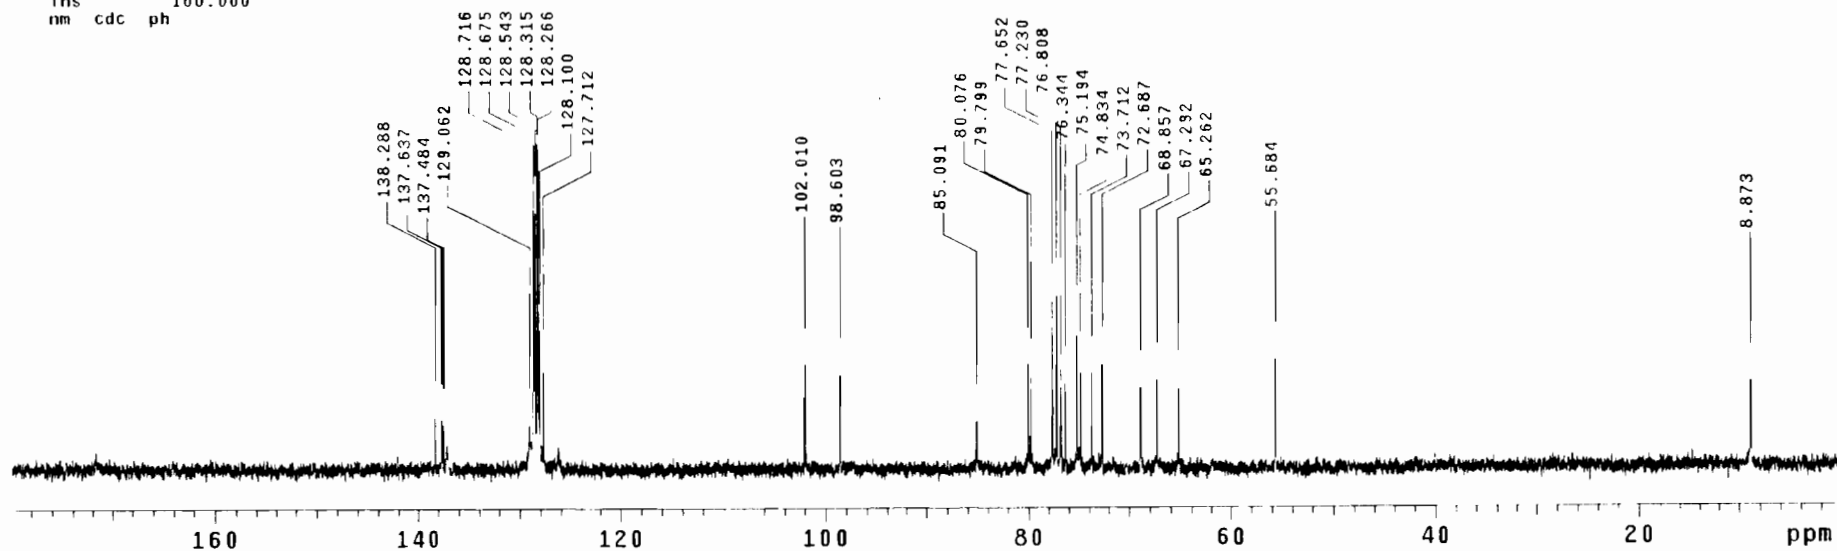

DHL-68\_4

exp1 s2pu1

| SAMPLE      |             | DEC. & VT |            |
|-------------|-------------|-----------|------------|
| date        | May 17 2008 | dfrq      | 499.864    |
| solvent     | CDCl3       | dn        | H1         |
| file        | exp         | dpwr      | 30         |
| ACQUISITION |             |           |            |
| sfrq        | 499.864     | dm        | nmh        |
| tn          | H1          | dmm       | c          |
| at          | 5.016       | dmf       | 200        |
| np          | 65536       | dseq      |            |
| sw          | 6533.3      | dres      | 1.0        |
| fb          | 4000        | homo      | n          |
| bs          | 4           | DEC2      |            |
| tpwr        | 61          | dfrq2     | 0          |
| pw          | 13.5        | dn2       |            |
| dl          | 0.100       | dpwr2     | 1          |
| tof         | 269.9       | dof2      | 0          |
| nt          | 32          | dm2       | n          |
| ct          | 32          | dmm2      | c          |
| alock       | n           | dmf2      | 200        |
| gain        | not used    | dseq2     |            |
| FLAGS       |             | dres2     | 1.0        |
| il          | n           | homo2     | n          |
| fn          | n           | DEC3      |            |
| dp          | y           | dfrq3     | 0          |
| hs          | nm          | dn3       |            |
| DISPLAY     |             |           |            |
| sp          | 502.5       | dpwr3     | 1          |
| wp          | 4996.3      | dof3      | 0          |
| vs          | 143         | dm3       | n          |
| sc          | 0           | dmm3      | c          |
| wc          | 250         | dmf3      | 200        |
| hzmm        | 19.99       | dseq3     |            |
| is          | 100.00      | dres3     | 1.0        |
| rfl         | 510.6       | homo3     | n          |
| PROCESSING  |             |           |            |
| rfl         | 0           | wtfile    | ft         |
| th          | 7           | proc      | fn         |
| ins         | 6.400       | math      | f          |
| ai          | ph          | werr      |            |
|             |             | wexp      | process pH |
|             |             | wbs       |            |
|             |             | wnt       | wft        |

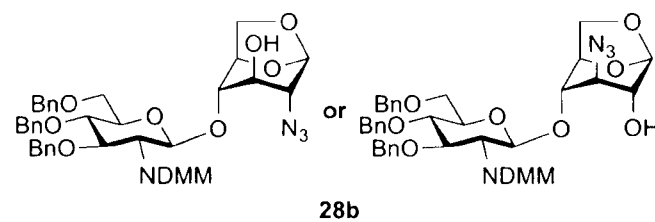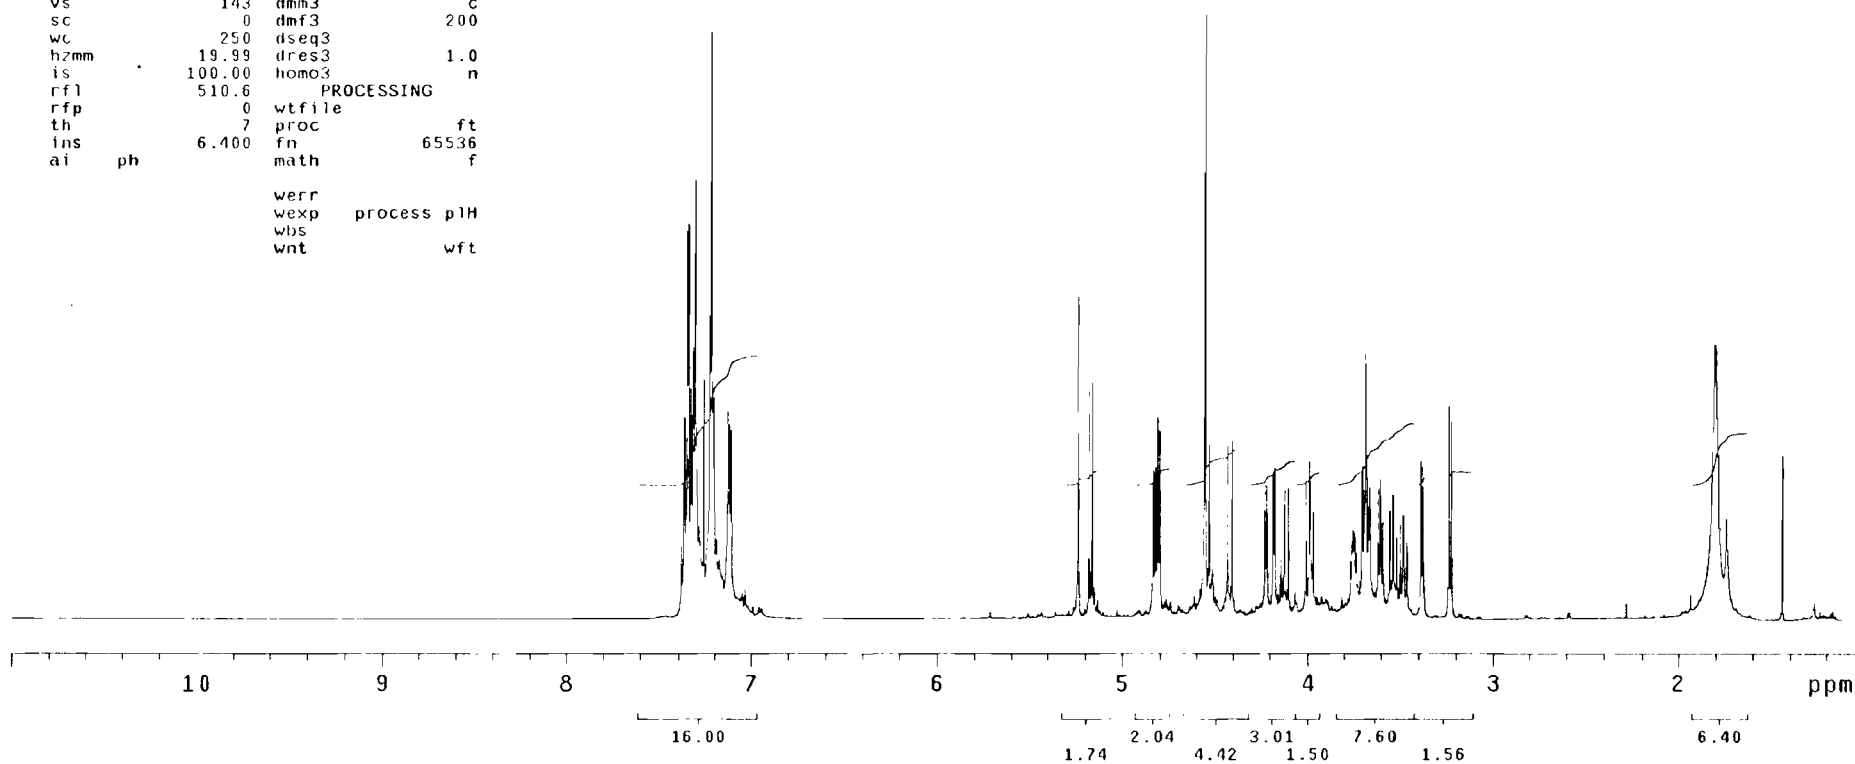

DHL-68\_4

exp2 s2pu1

| SAMPLE      |             | DEC. & VT  |         |
|-------------|-------------|------------|---------|
| date        | May 17 2008 | dfrq       | 499.864 |
| solvent     | CDC13       | dn         | H1      |
| file        | exp         | dpwr       | 40      |
| ACQUISITION |             | dof        | 0       |
| sfrq        | 125.702     | dm         | yyy     |
| tn          | C13         | dmm        | w       |
| at          | 1.215       | dmi        | 8787.35 |
| np          | 65536       | dseq       |         |
| sw          | 26963.3     | dres       | 1.0     |
| fb          | 15000       | homo       | n       |
| bs          | 4           | DEC2       |         |
| tpwr        | 52          | dfrq2      | 0       |
| pw          | 10.2        | dn2        |         |
| dl          | 1.800       | dpwr2      | 1       |
| tof         | 144.5       | dof2       | 0       |
| nt          | 10000       | dm2        | n       |
| ct          | 5381        | dmm2       | c       |
| alock       | n           | dmi2       | 10000   |
| gain        | not used    | dseq2      |         |
| FLAGS       |             | dres2      | 1.0     |
| il          | n           | homo2      | n       |
| in          | n           | DEC3       |         |
| dp          | y           | dfrq3      | 0       |
| hs          | nn          | dn3        |         |
| DISPLAY     |             | dpwr3      | 1       |
| sp          | 826.8       | dof3       | 0       |
| wp          | 22604.6     | dm3        | n       |
| vs          | 381         | dmm3       | c       |
| sc          | 0           | dmi3       | 10000   |
| wc          | 250         | dseq3      |         |
| hzmm        | 90.42       | dres3      | 1.0     |
| is          | 500.00      | homo3      | n       |
| rfl         | 1405.6      | PROCESSING |         |
| rfp         | 0           | lb         | 1.00    |
| th          | 4           | wtfile     |         |
| ins         | 100.000     | proc       | ft      |
| ai          | cdc         | fn         | 131072  |
| ph          |             | math       | f       |
|             |             | werr       |         |
|             |             | wexp       |         |
|             |             | wbs        |         |
|             |             | wnt        |         |

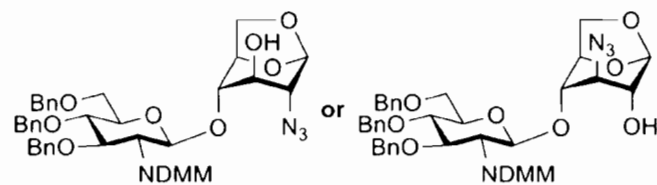

28b

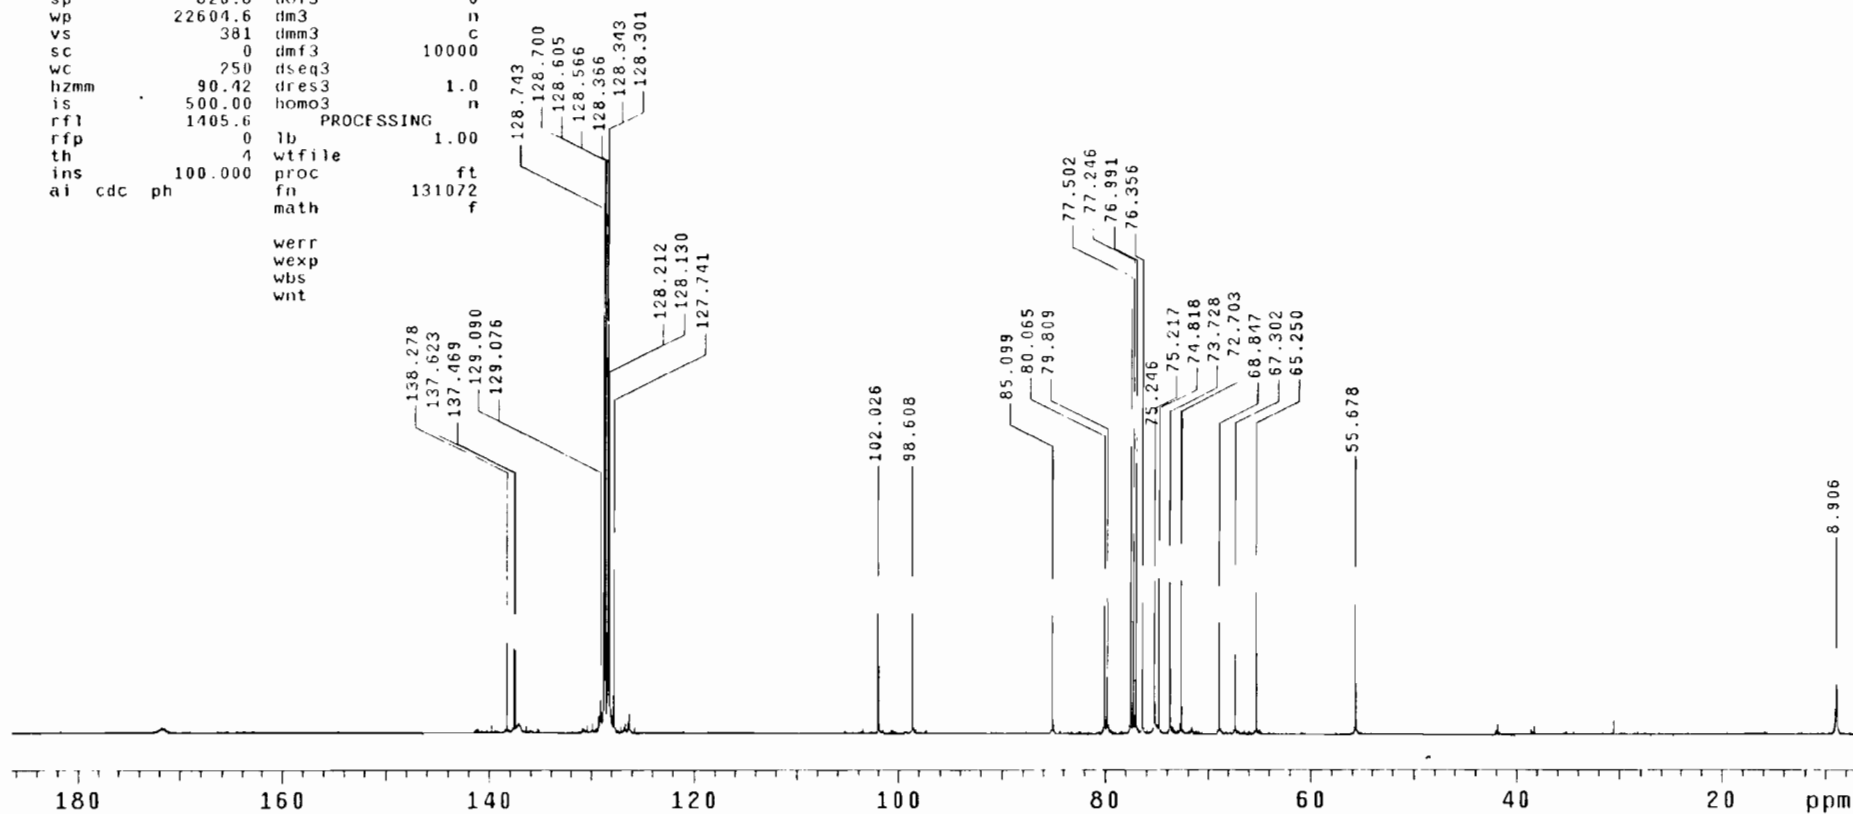

DHL-68\_4

Pulse Sequence: dept

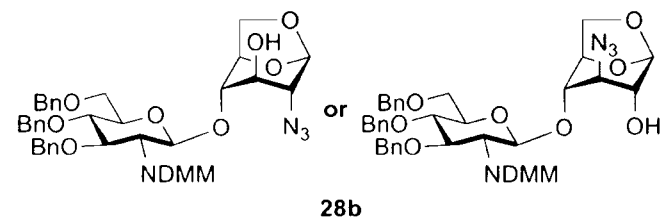

CH3 carbons

CH2 carbons

CH carbons

all protonated carbons

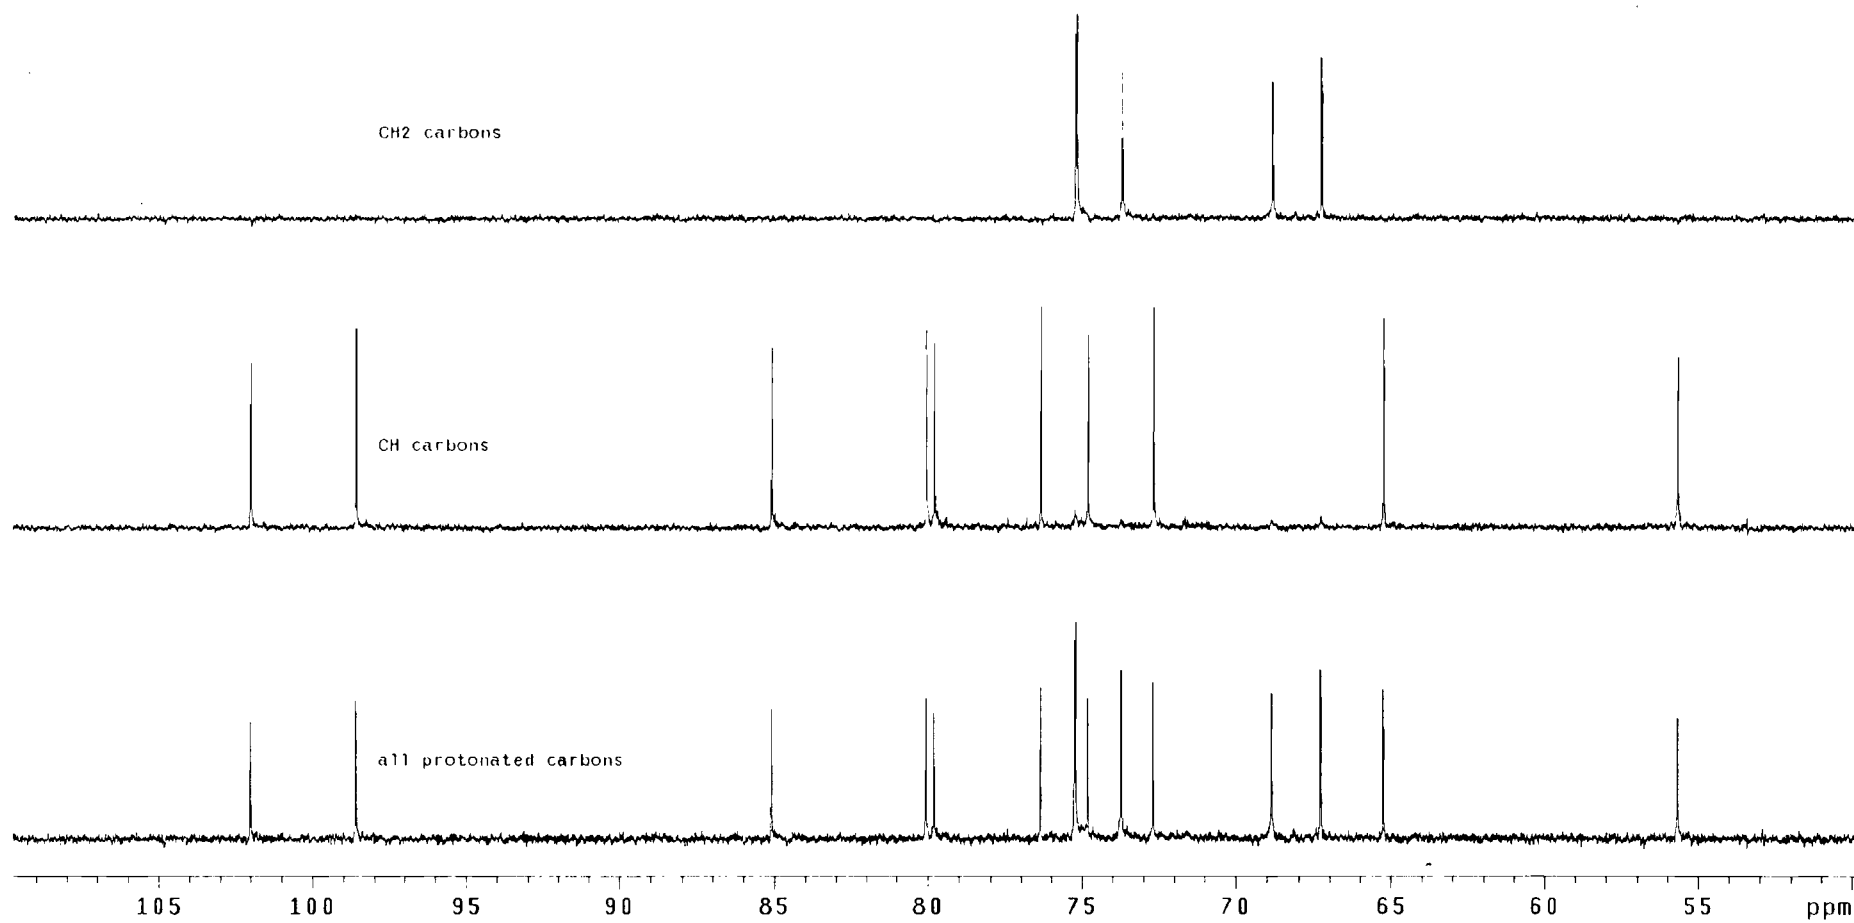

DHL-77

exp1 s2pu1

|             |            |            |            |
|-------------|------------|------------|------------|
| SAMPLE      |            | DEC. & VT  |            |
| date        | Jun 5 2008 | dfrq       | 499.864    |
| solvent     | CDC13      | dn         | H1         |
| file        | exp        | dpwr       | 30         |
| ACQUISITION |            | dof        | 0          |
| sfrq        | 499.864    | dm         | nnn        |
| tn          | H1         | dmm        | c          |
| at          | 5.016      | dmf        | 200        |
| np          | 65536      | dscq       |            |
| sw          | 6533.3     | dres       | 1.0        |
| fb          | 4000       | homo       | n          |
| bs          | 4          | DEC2       |            |
| tpwr        | 61         | dfrq2      | 0          |
| pw          | 13.5       | dn2        |            |
| d1          | 0.100      | dpwr2      | 1          |
| tof         | 269.9      | dof2       | 0          |
| nt          | 16         | dm2        | n          |
| ct          | 16         | dmm2       | c          |
| alock       | n          | dmf2       | 200        |
| gain        | not used   | dscq2      |            |
| FLAGS       |            | dres2      | 1.0        |
| il          | n          | homo2      | n          |
| in          | n          | DEC3       |            |
| dp          | y          | dfrq3      | 0          |
| hs          | nn         | dn3        |            |
| DISPLAY     |            | dpwr3      | 1          |
| sp          | 791.0      | dof3       | 0          |
| wp          | 2940.1     | dm3        | n          |
| vs          | 46         | dmm3       | c          |
| sc          | 0          | dmf3       | 200        |
| wc          | 250        | dscq3      |            |
| hzmm        | 11.76      | dres3      | 1.0        |
| rs          | 200.00     | homo3      | n          |
| rfl         | 510.6      | PROCESSING |            |
| rfp         | 0          | wtfile     |            |
| th          | 7          | proc       | ft         |
| ins         | 1.000      | fn         | 65536      |
| ai          | ph         | math       | f          |
|             |            | werr       |            |
|             |            | wexp       | process pH |
|             |            | wbs        |            |
|             |            | wnt        | wft        |

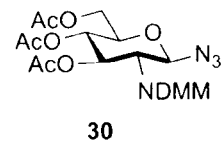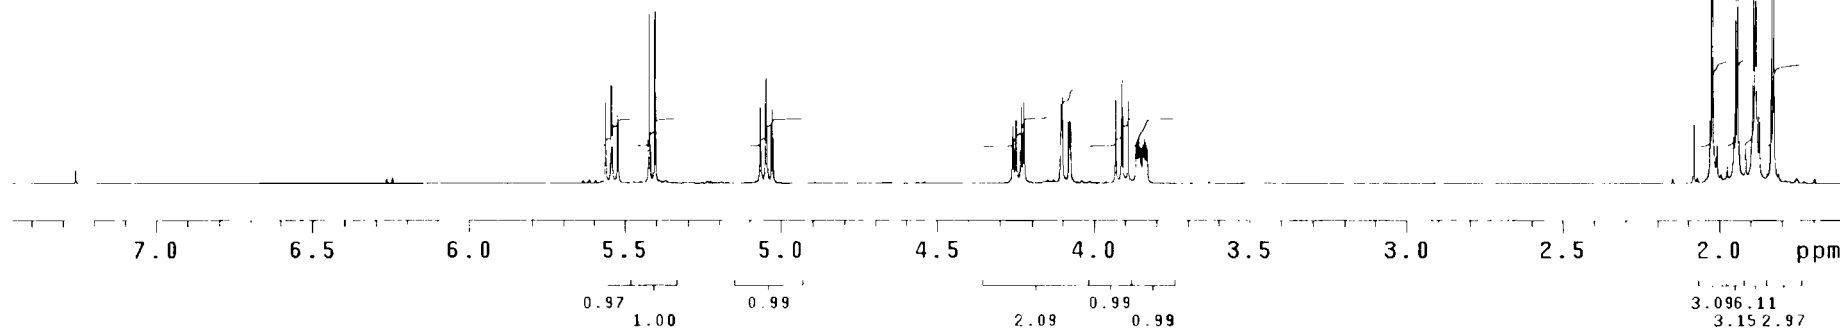

DHL-77

Pulse Sequence: relayh

Solvent: CDCl<sub>3</sub>

Ambient temperature

INOVA-500 "nmr2a.chem.nd.edu"

Relax. delay 1.300 sec

COSY 90-90

Acq. time 0.219 sec

Width 2334.9 Hz

2D Width 2334.9 Hz

4 repetitions

256 increments

OBSERVE H1, 499.8611751 MHz

DATA PROCESSING

Sine bell 0.110 sec

F1 DATA PROCESSING

Sine bell 0.055 sec

FT size 1024 x 1024

Total time 27 min, 14 sec

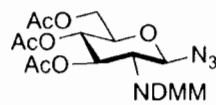

30

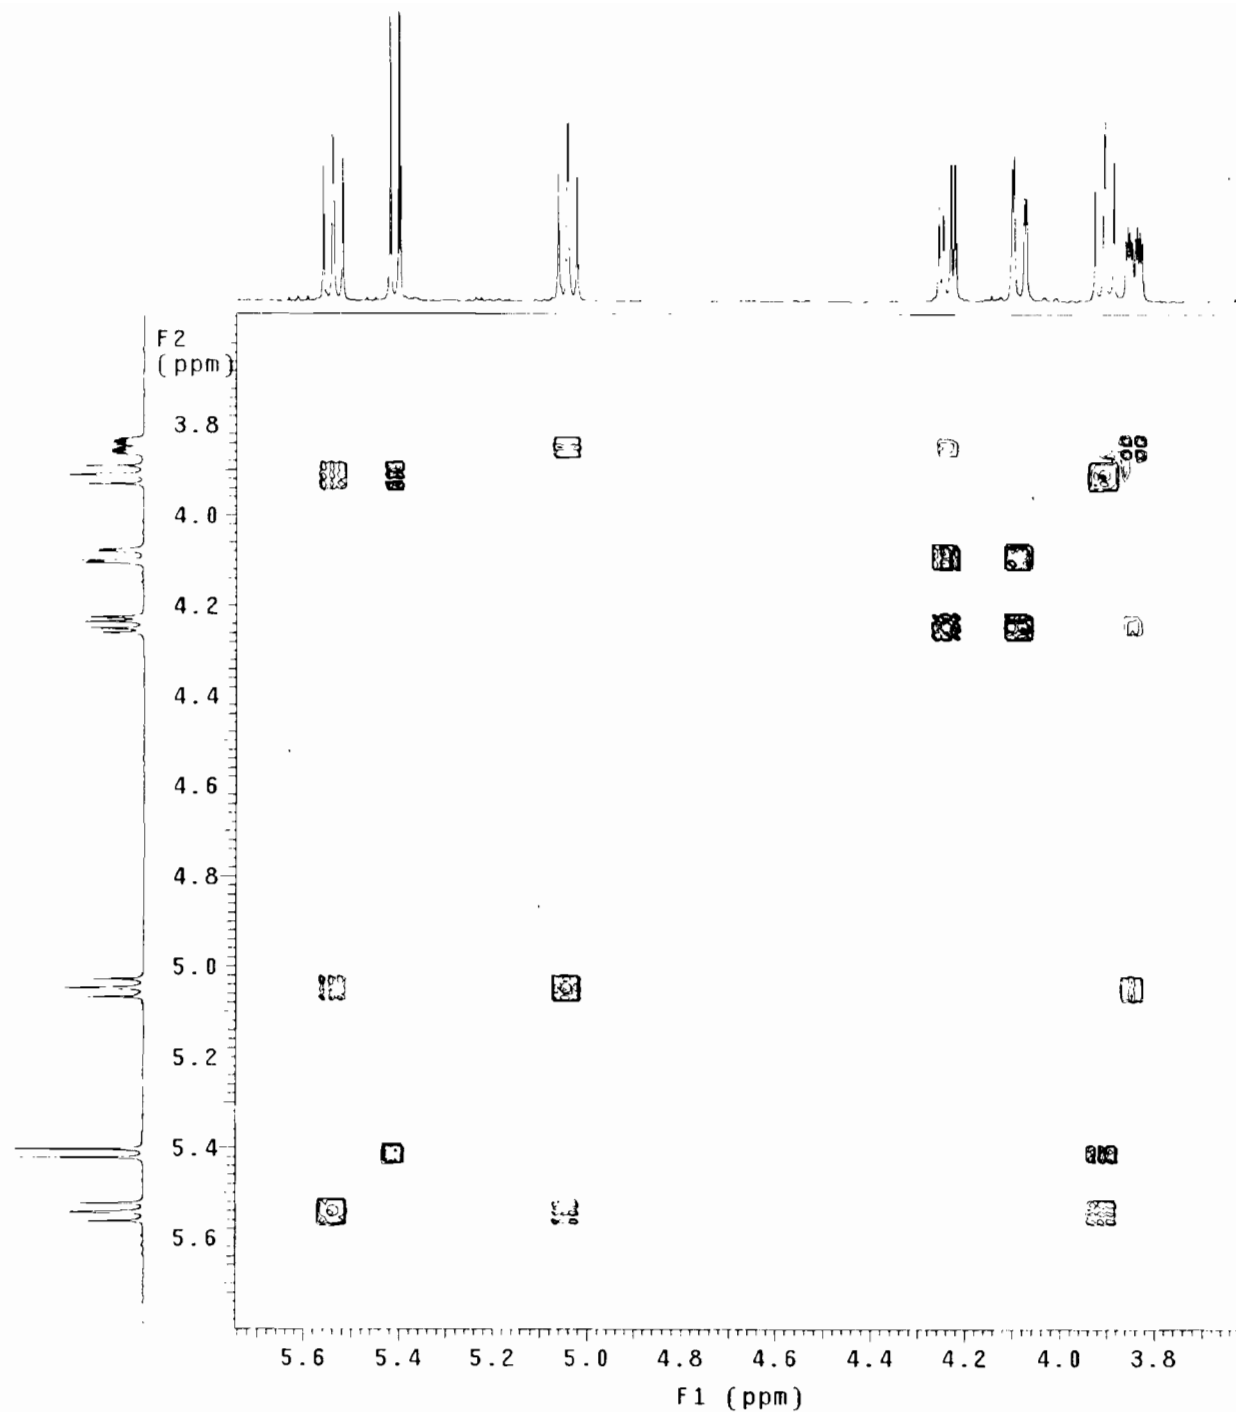

DHL-77

exp2 s2pu1

|             |            |            |         |
|-------------|------------|------------|---------|
| SAMPLE      |            | DEC. & VT  |         |
| date        | Jun 5 2008 | dfrq       | 499.864 |
| solvent     | CDC13      | dn         | H1      |
| file        | exp        | dpwr       | 40      |
| ACQUISITION |            | dof        | 0       |
| sfrq        | 125.702    | dm         | yyy     |
| tn          | C13        | dmm        | w       |
| at          | 1.215      | dmf        | 8787.35 |
| np          | 65536      | dseq       |         |
| sw          | 26963.3    | dres       | 1.0     |
| fb          | 15000      | homo       | n       |
| bs          | 4          | DEC2       |         |
| tpwr        | 52         | dfrq2      | 0       |
| pw          | 10.2       | dn2        |         |
| dl          | 1.800      | dpwr2      | 1       |
| tof         | 144.5      | dof2       | 0       |
| nt          | 64         | dm2        | n       |
| ct          | 60         | dmm2       | c       |
| alock       | n          | dmf2       | 10000   |
| gain        | not used   | dseq2      |         |
| FLAGS       |            | dres2      | 1.0     |
| il          | n          | homo2      | n       |
| in          | n          | DEC3       |         |
| dp          | y          | dfrq3      | 0       |
| hs          | nn         | dn3        |         |
| DISPLAY     |            | dpwr3      | 1       |
| sp          | -0.6       | dof3       | 0       |
| wp          | 22604.6    | dm3        | n       |
| vs          | 64         | dmm3       | c       |
| sc          | 0          | dmf3       | 10000   |
| wc          | 250        | dseq3      |         |
| hzmm        | 90.42      | dres3      | 1.0     |
| ts          | 500.00     | homo3      | n       |
| rf1         | 11125.0    | PROCESSING |         |
| rfp         | 9707.1     | lb         | 1.00    |
| th          | 6          | wtfile     |         |
| ins         | 100.000    | proc       | ft      |
| ai          | cdc ph     | fn         | 131072  |
|             |            | math       | f       |

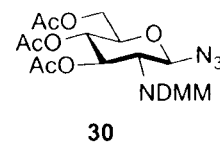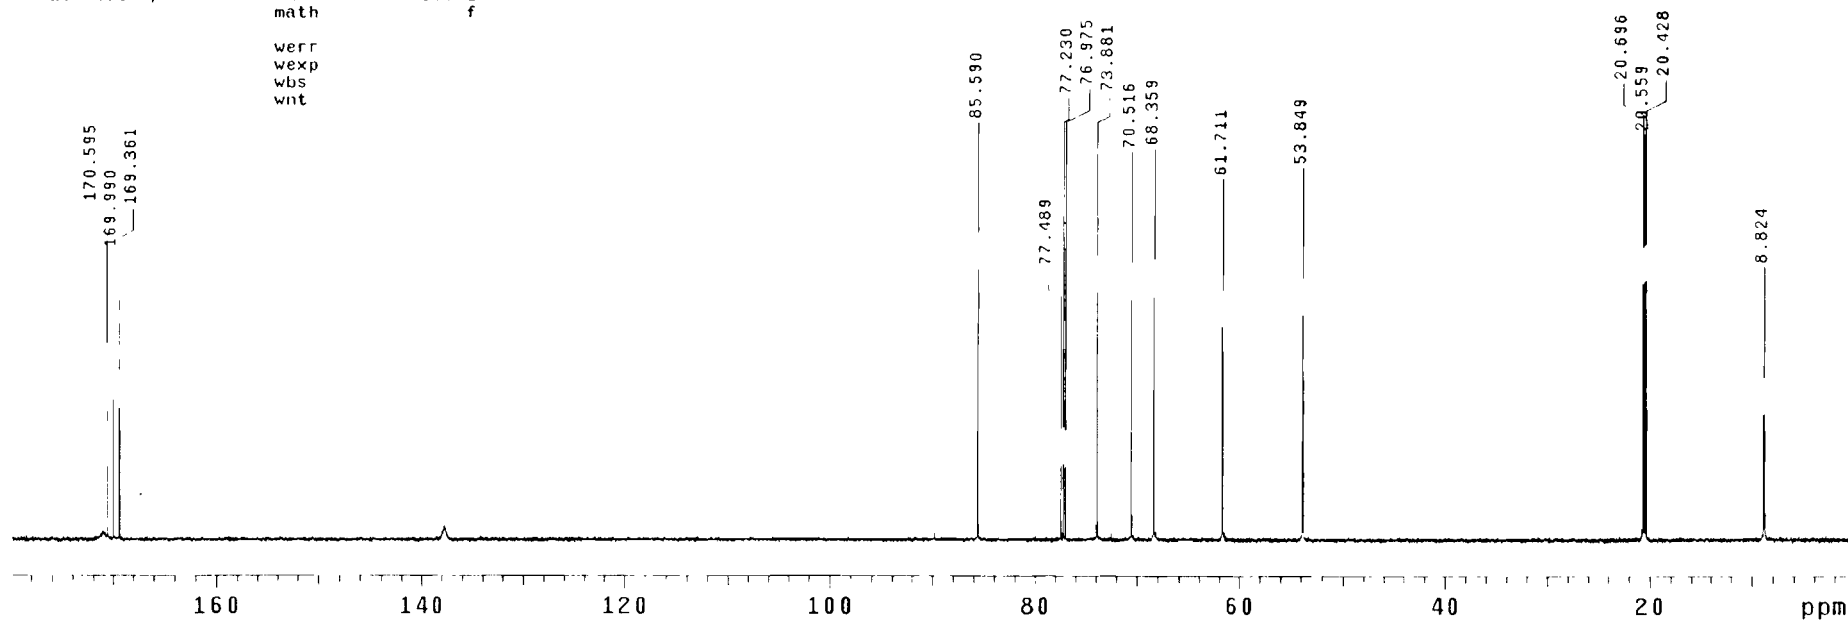

DHL-77

Pulse Sequence: dept

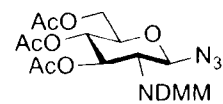

30

CH3 carbons

CH2 carbons

CH carbons

all protonated carbons

100 90 80 70 60 50 40 30 20 10 ppm

DHL-77

Pulse Sequence: hetcor

Solvent: CDCl<sub>3</sub>

Ambient temperature

User: 1-14-87

INOVA-500 "nmr2a.chem.nd.edu"

Relax. delay 1.500 sec

Acq. time 0.111 sec

Width 18403.5 Hz

2D Width 2030.3 Hz

4 repetitions

128 increments

OBSERVE C13, 125.6901825 MHz

DECOUPLE H1, 499.8630359 MHz

Power 40 dB

on during acquisition

off during delay

WALTZ-16 modulated

DATA PROCESSING

line broadening 1.0 Hz

F1 DATA PROCESSING

line broadening 0.3 Hz

FT size 4096 x 512

Total time 14 min, 20 sec

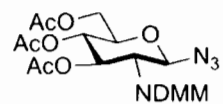

30

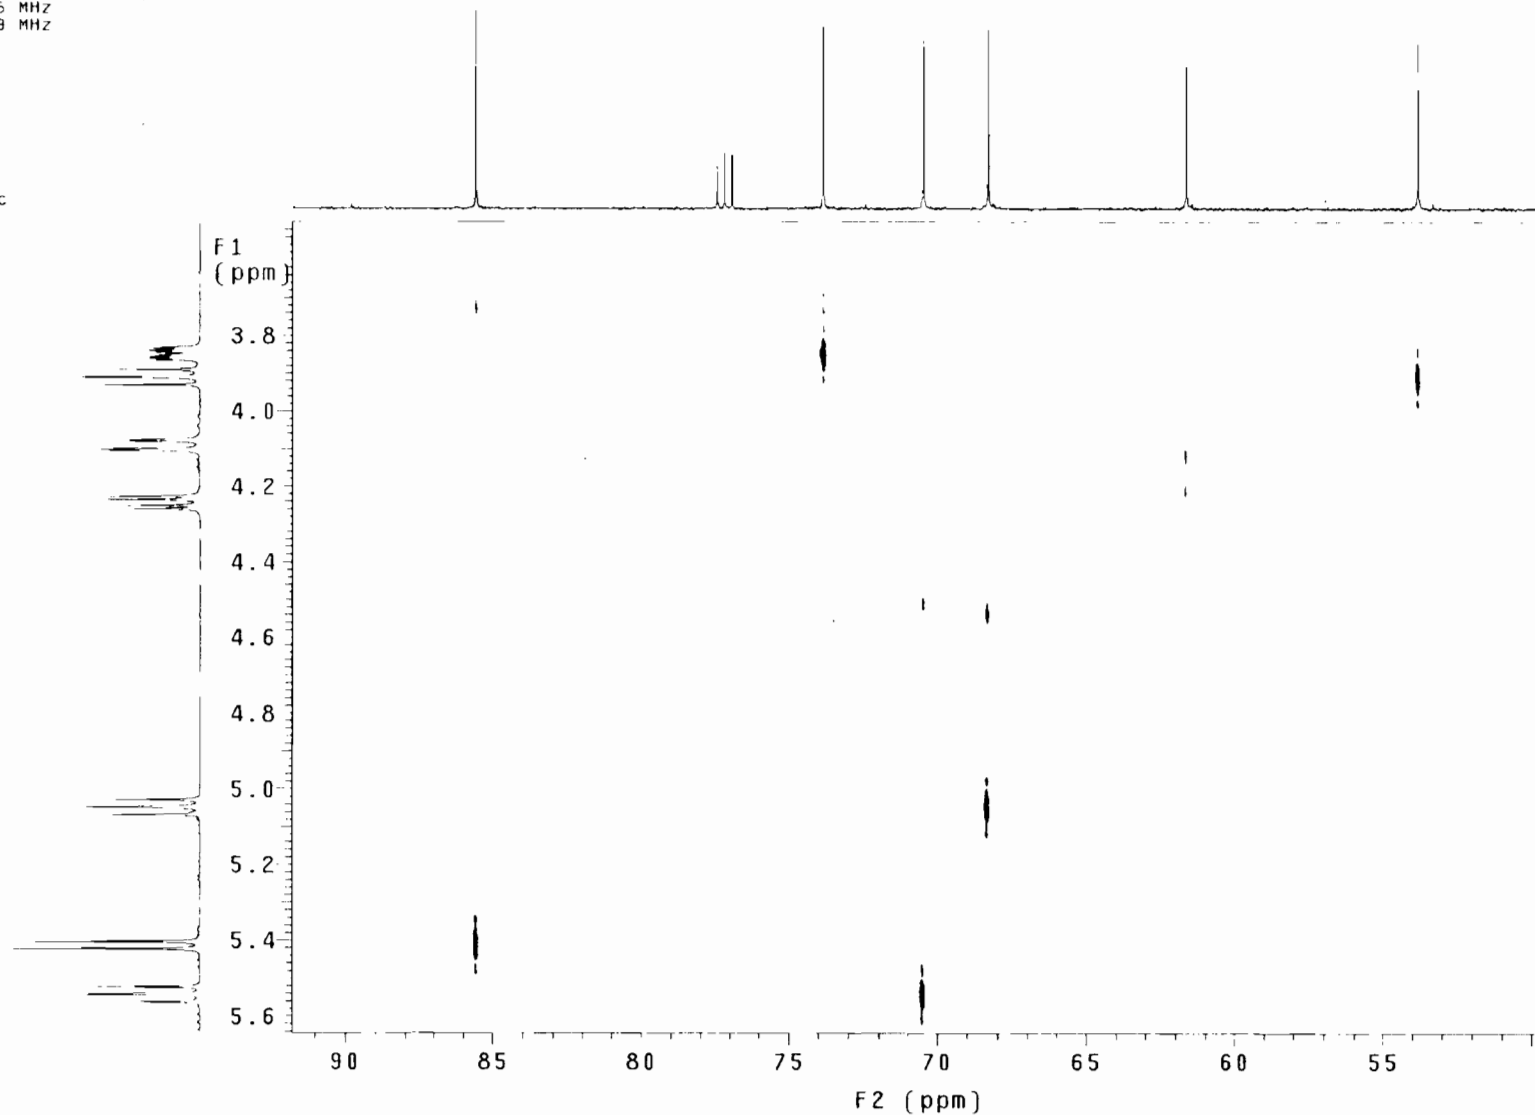

DHL-73

expl s2pu1

|             |             |            |            |
|-------------|-------------|------------|------------|
| SAMPLE      |             | DEC. & VT  |            |
| date        | May 30 2008 | dfrq       | 499.864    |
| solvent     | CDCl3       | dn         | H1         |
| file        | exp         | dpwr       | 30         |
| ACQUISITION |             | dof        | 0          |
| sfrq        | 499.864     | dm         | nmh        |
| tn          | H1          | dmm        | C          |
| at          | 5.016       | dmf        | 200        |
| np          | 65536       | dseq       |            |
| sw          | 6533.3      | dres       | 1.0        |
| fb          | 4000        | homo       | n          |
| bs          | 4           | DEC2       |            |
| tpwr        | 61          | dfrq2      | 0          |
| pw          | 13.5        | dn2        |            |
| d1          | 0.100       | dpwr2      | 1          |
| tof         | 269.9       | dof2       | 0          |
| nt          | 16          | dm2        | n          |
| ct          | 16          | dmm2       | C          |
| alock       | n           | dmf2       | 200        |
| gain        | not used    | dseq2      |            |
| FLAGS       |             | dres2      | 1.0        |
| il          | n           | homo2      | n          |
| in          | n           | DEC3       |            |
| dp          | y           | dfrq3      | 0          |
| hs          | nn          | dn3        |            |
| DISPLAY     |             | dpwr3      | 1          |
| sp          | 502.5       | dof3       | 0          |
| wp          | 4987.7      | dm3        | n          |
| vs          | 185         | dmm3       | C          |
| sc          | 0           | dmf3       | 200        |
| wc          | 250         | dseq3      |            |
| hzmm        | 19.95       | dres3      | 1.0        |
| is          | 73.59       | homo3      | n          |
| if1         |             | PROCESSING |            |
| rft         | 510.6       | wtfile     |            |
| rft         | 0           | proc       | ft         |
| th          | 7           | fn         | 65536      |
| ins         | 10.400      | math       | f          |
| al          | ph          | werr       |            |
|             |             | wexp       | process pH |
|             |             | wbs        |            |
|             |             | wnt        | wft        |

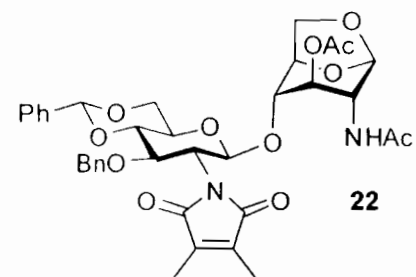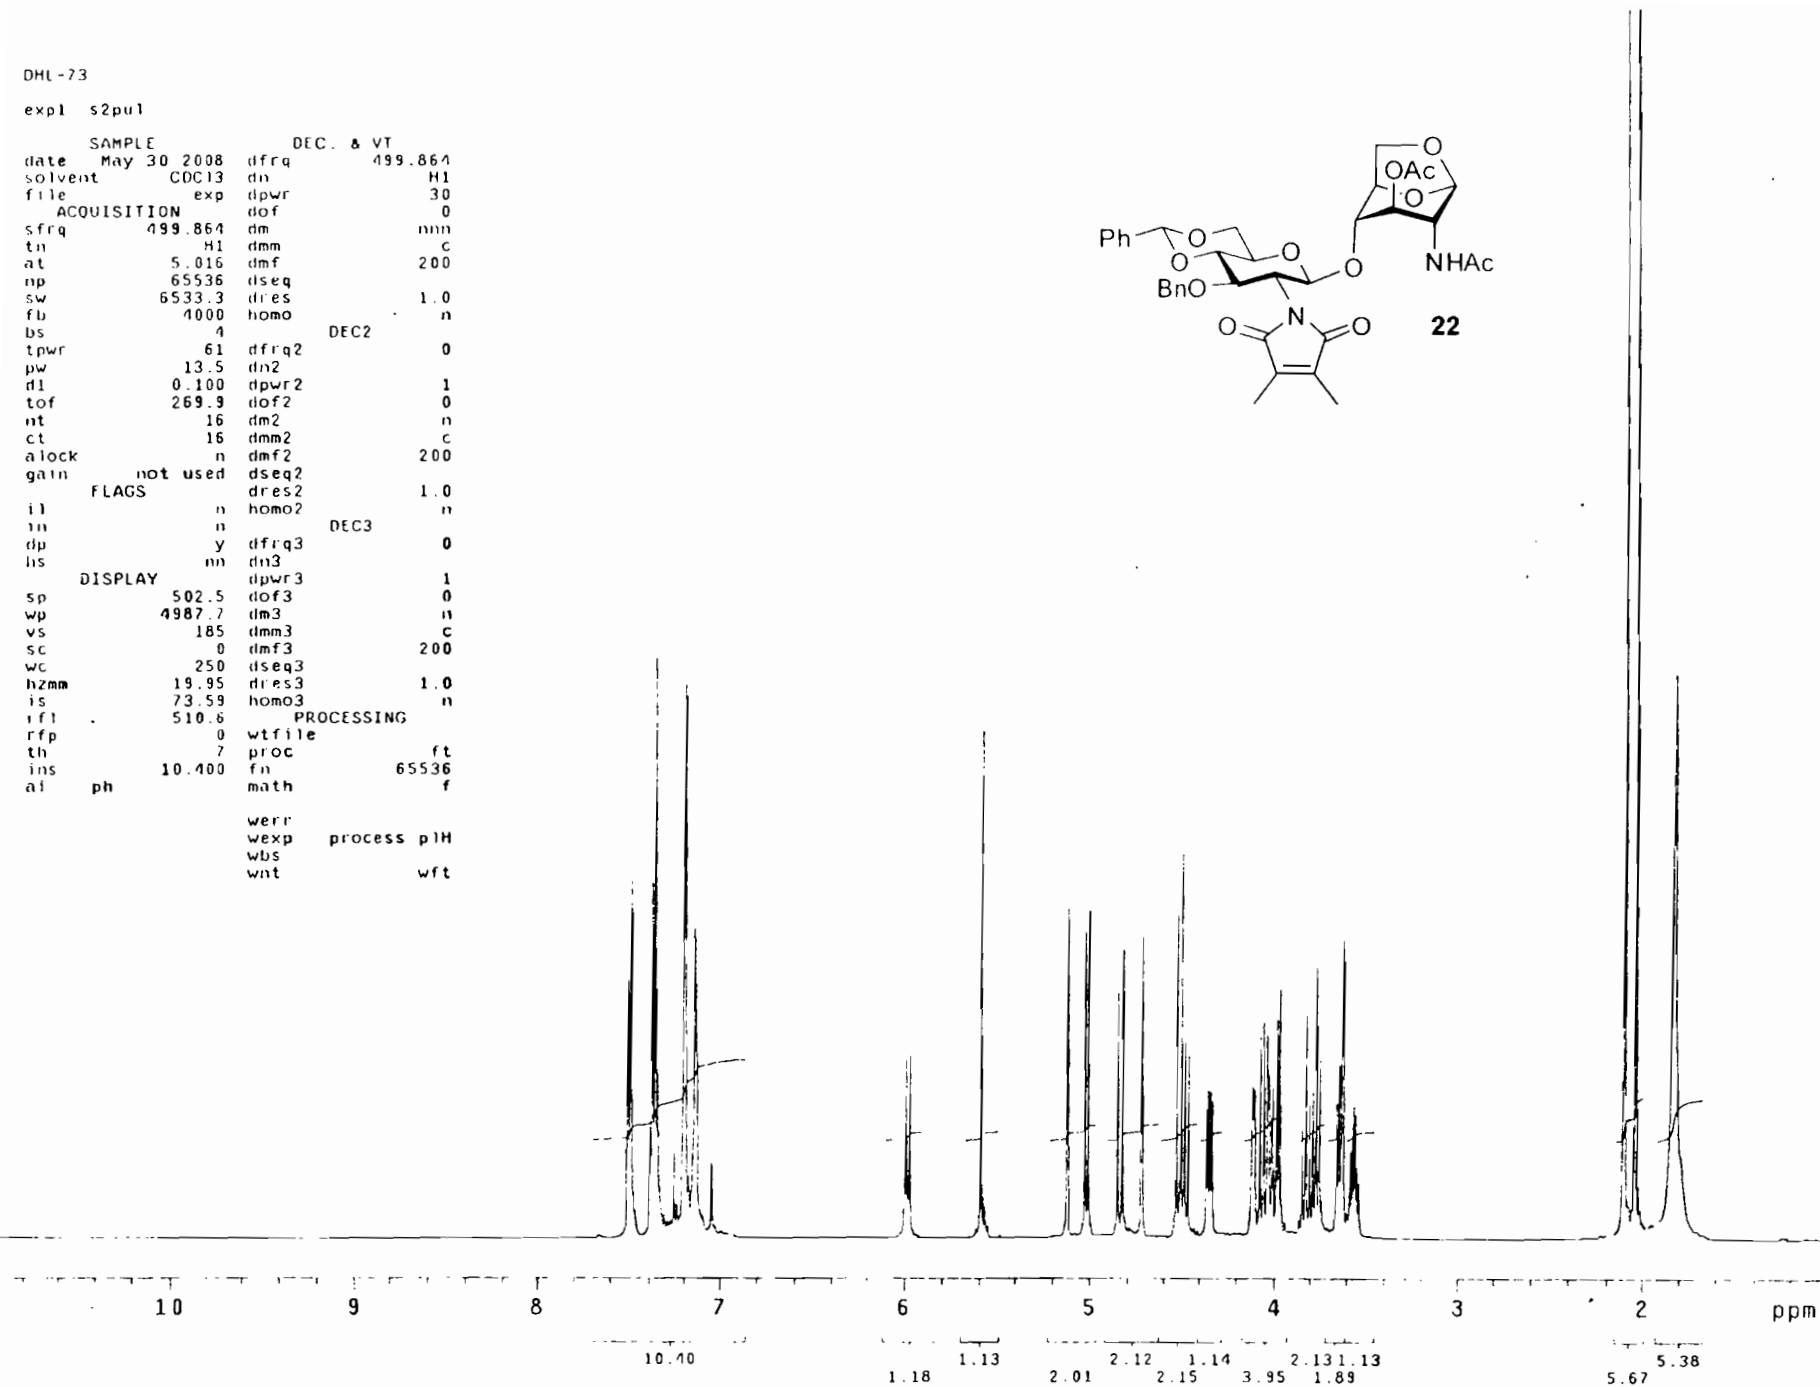

DHL-73

Pulse Sequence: relayh

Solvent: CDCl<sub>3</sub>  
Ambient temperature  
INOVA-500 "nmr2a.chem.nd.edu

Relax. delay 1.300 sec  
COSY 90-90  
Acq. time 0.161 sec  
Width 3172.1 Hz  
2D Width 3172.1 Hz  
8 repetitions  
256 increments  
OBSERVE H1, 499.8611751 MHz  
DATA PROCESSING  
Sine bell 0.081 sec  
F1 DATA PROCESSING  
Sine bell 0.040 sec  
FT size 1024 x 1024  
Total time 51 min, 48 sec

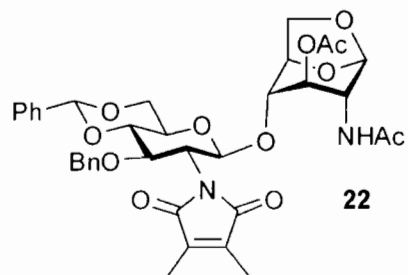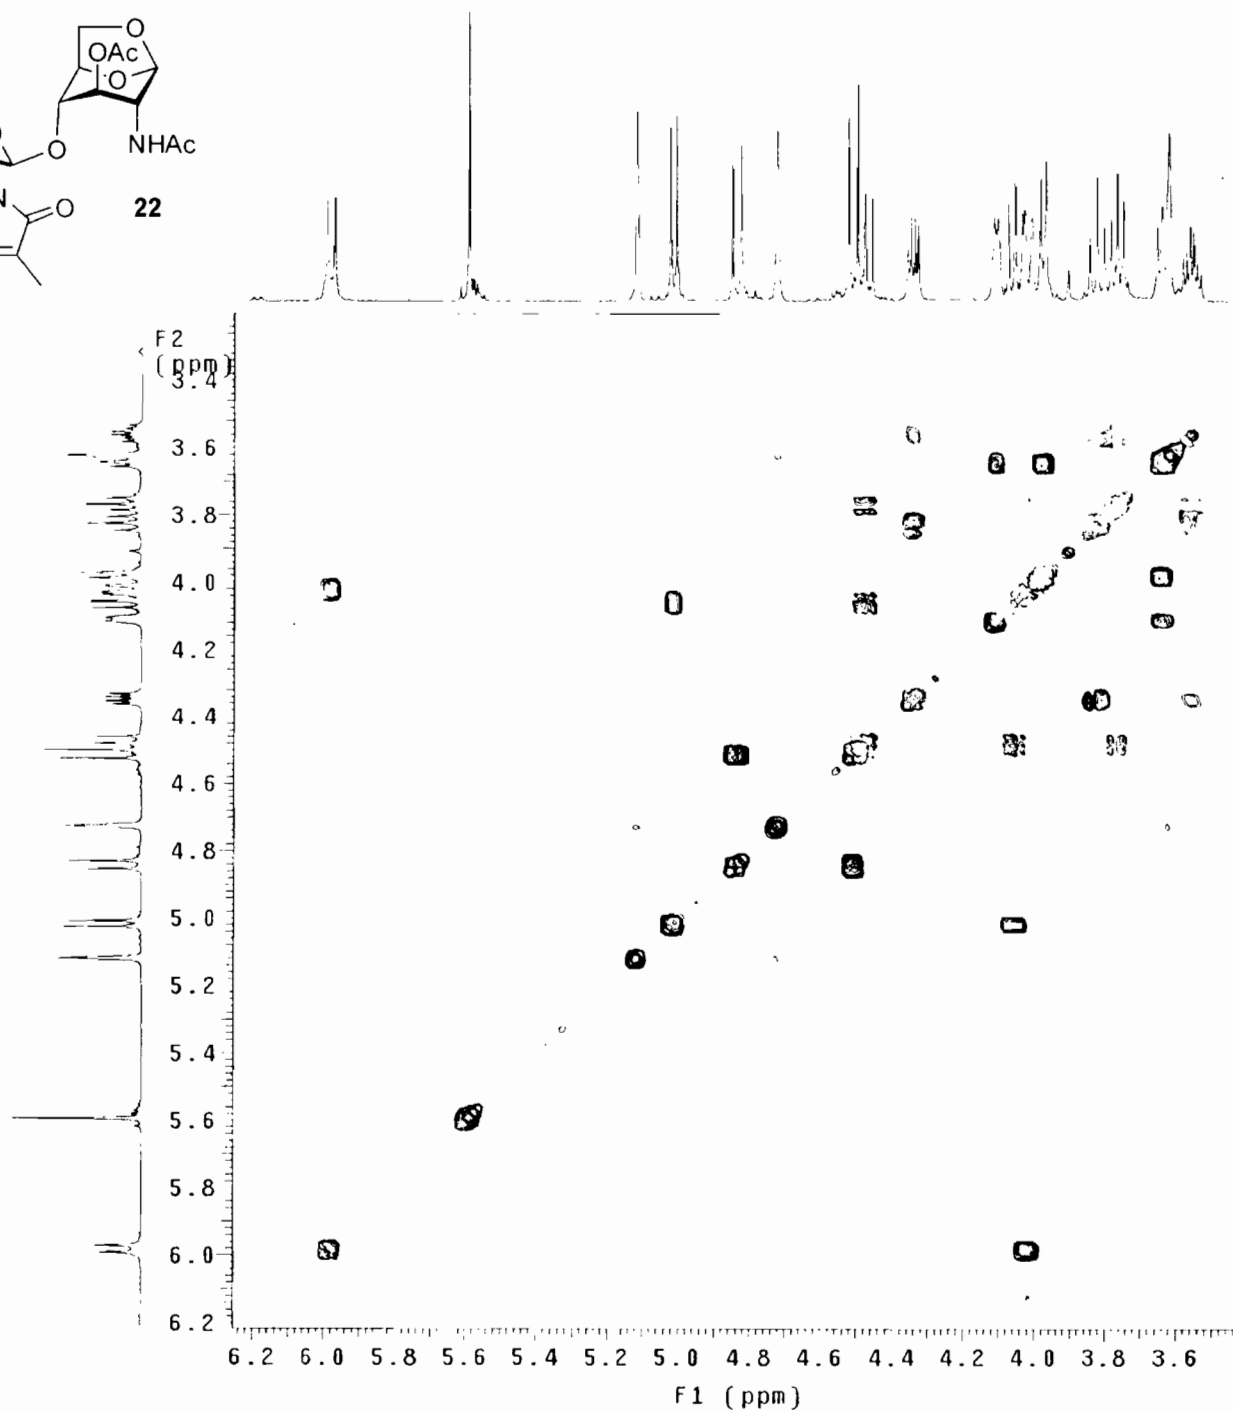

DHI -73

exp2 s2pu1

| SAMPLE      |             | DEC. & VT  |         |
|-------------|-------------|------------|---------|
| date        | May 30 2008 | dfrq       | 499.864 |
| solvent     | CDC13       | dn         | H1      |
| file        | exp         | dpwr       | 40      |
| ACQUISITION |             | dof        | 0       |
| sfrq        | 125.702     | dm         | yyy     |
| tn          | C13         | dmm        | w       |
| at          | 1.215       | dmf        | 8787.35 |
| np          | 65536       | dseq       |         |
| sw          | 26963.3     | dres       | 1.0     |
| fb          | 15000       | homo       | n       |
| bs          | 4           | DFC2       |         |
| tpwr        | 52          | dfrq2      | 0       |
| pw          | 10.2        | dn2        |         |
| d1          | 1.800       | dpwr2      | 1       |
| tof         | 144.5       | dof2       | 0       |
| nt          | 640         | dm2        | n       |
| ct          | 146         | dmm2       | c       |
| alock       | n           | dmf2       | 10000   |
| gain        | not used    | dseq2      |         |
| FLAGS       |             | dres2      | 1.0     |
| il          | n           | homo2      | n       |
| in          | n           | DFC3       |         |
| dp          | y           | dfrq3      | 0       |
| hs          | nn          | dn3        |         |
| DISPLAY     |             | dpwr3      | 1       |
| sp          | 837.5       | dof3       | 0       |
| wp          | 23415.1     | dm3        | n       |
| vs          | 111         | dmm3       | c       |
| sc          | 0           | dmf3       | 10000   |
| wc          | 250         | dseq3      |         |
| hzmm        | 93.66       | dres3      | 1.0     |
| is          | 500.00      | homo3      | n       |
| rfl         | 11133.6     | PROCESSING |         |
| rpf         | 9707.1      | lb         | 1.00    |
| th          | 5           | wtfile     |         |
| ins         | 100.000     | proc       | ft      |
| ai          | cdc ph      | fn         | 131072  |
|             |             | math       | f       |

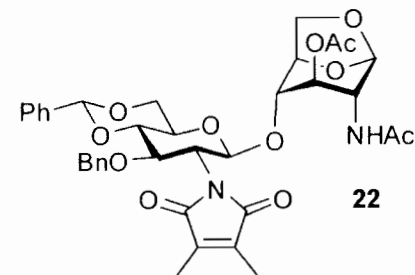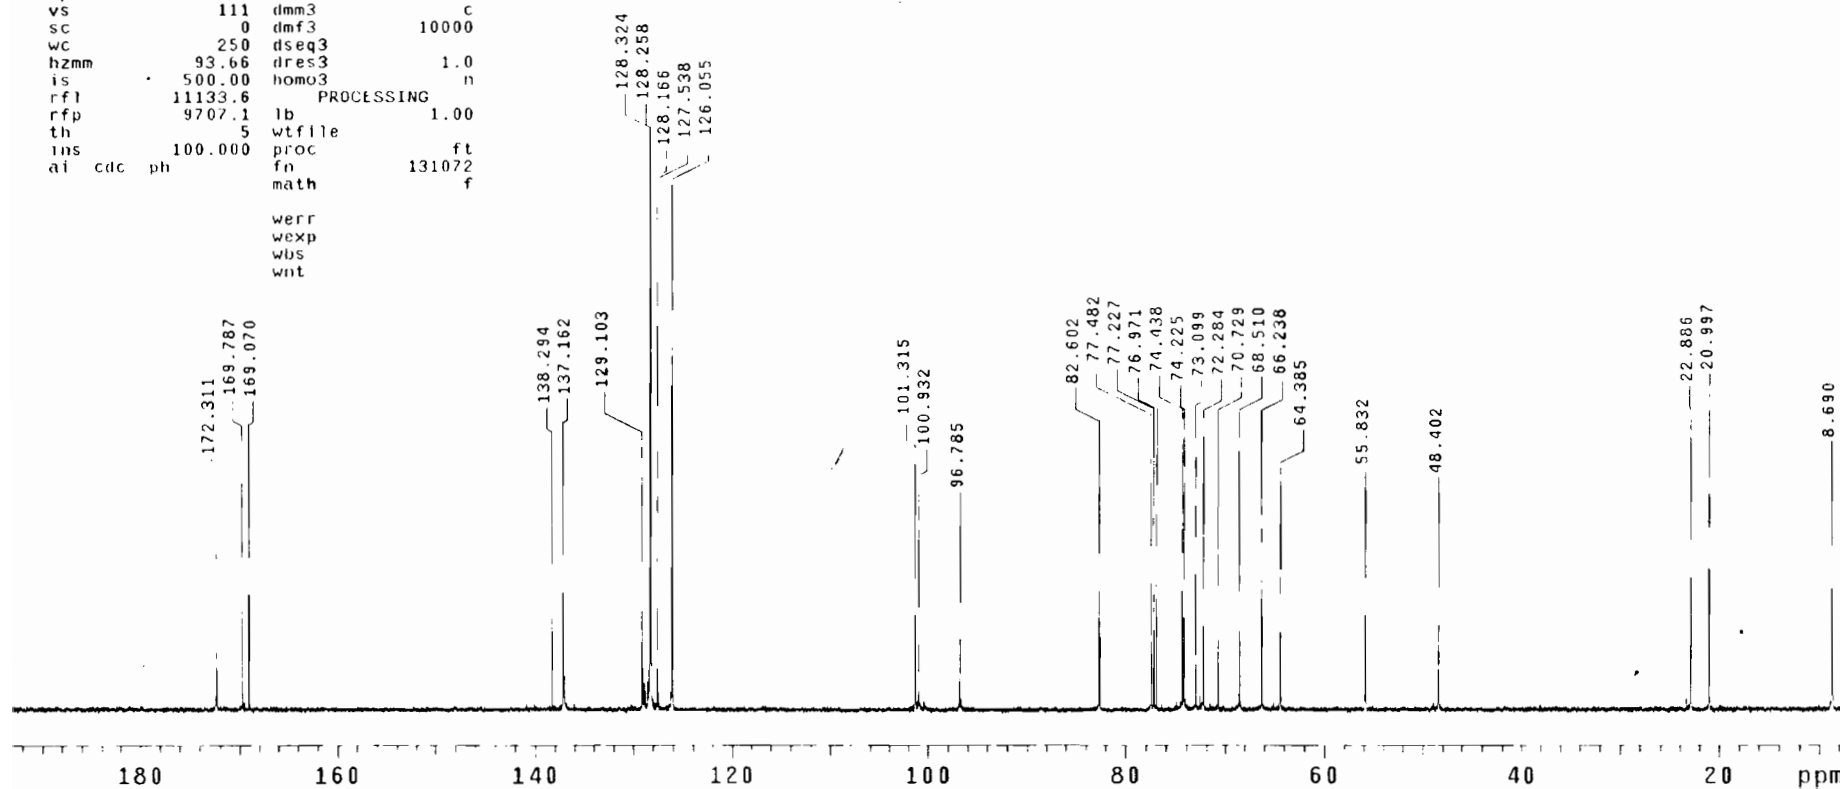

DHL-73

Pulse Sequence: hetcor

Solvent: CDCl<sub>3</sub>

Ambient temperature

User: 1-14-87

INOVA-500 "nmr2a.chem.nd.edu"

Relax. delay 1.500 sec

Acq. time 0.111 sec

Width 18403.5 Hz

2D Width 3408.0 Hz

4 repetitions

256 increments

OBSERVE C13, 125.6901907 MHz

DECOUPLE H1, 499.8635019 MHz

Power 40 dB

on during acquisition

off during delay

WALTZ-16 modulated

DATA PROCESSING

Line broadening 1.0 Hz

F1 DATA PROCESSING

Line broadening 0.3 Hz

FT size 4096 x 512

Total time 28 min, 39 sec

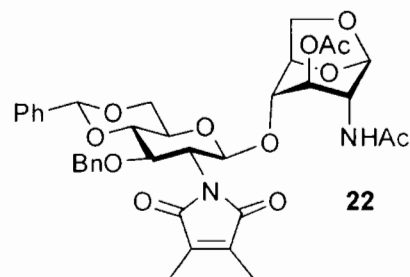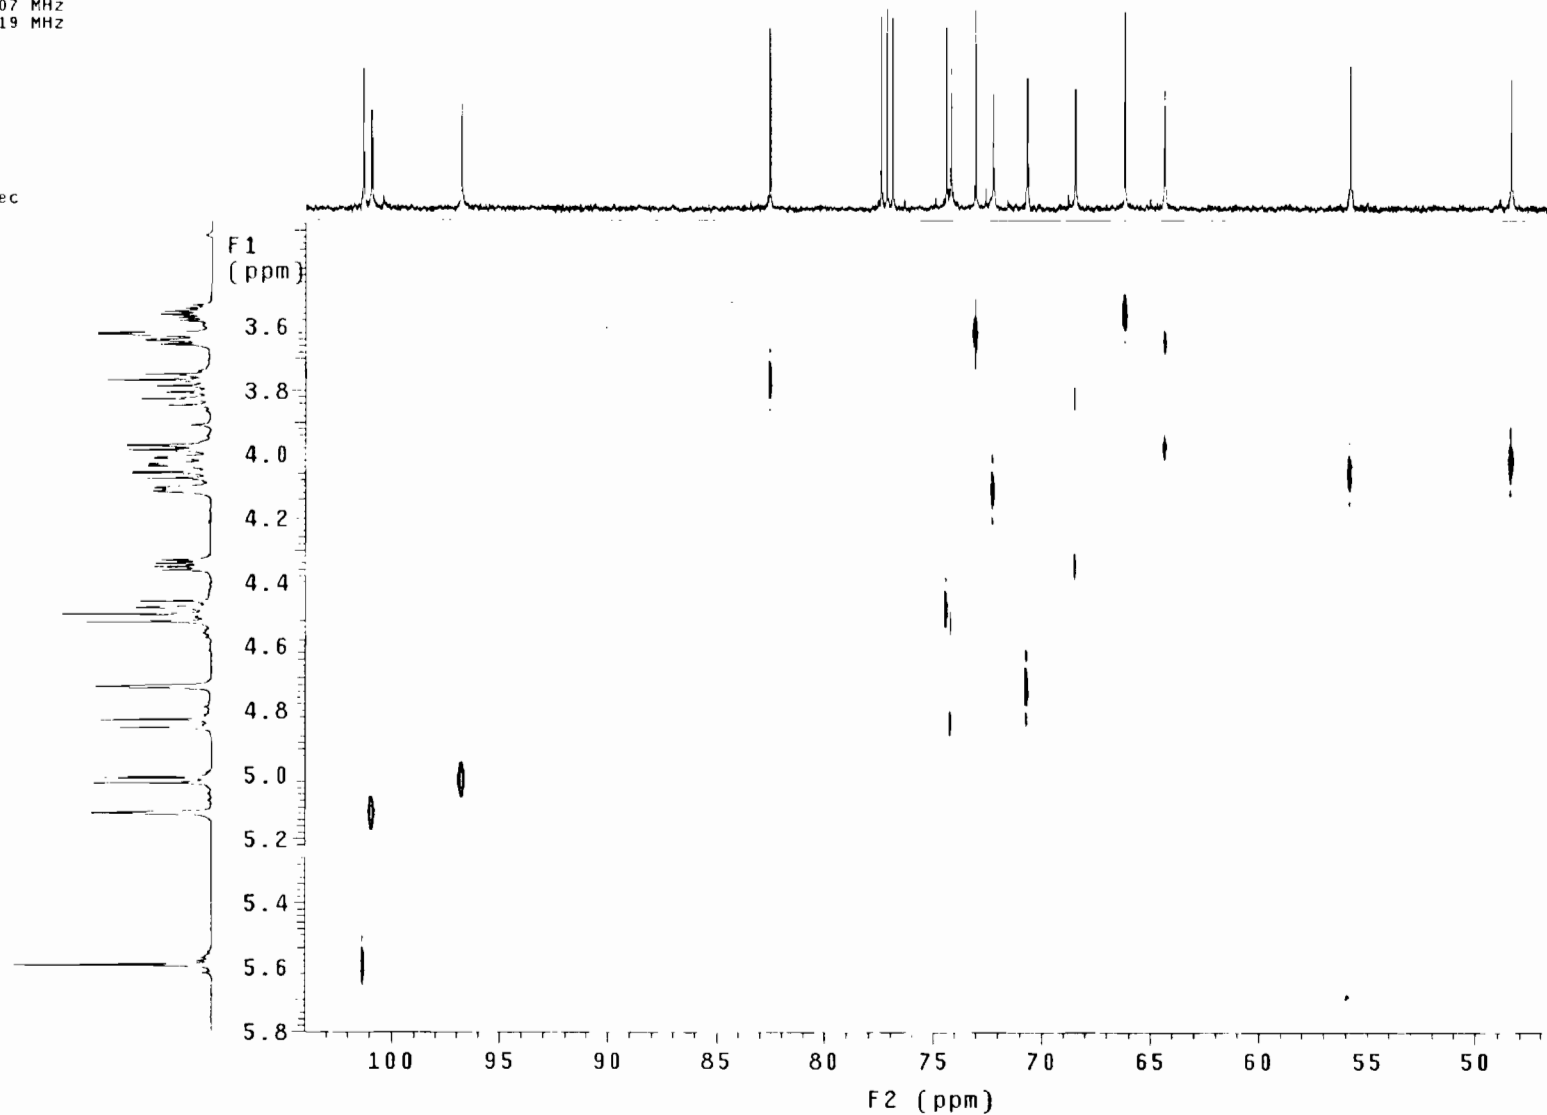

DHL-75

exp1 s2pul

| SAMPLE      |            | DEC. & VT |            |
|-------------|------------|-----------|------------|
| date        | Jun 1 2008 | dfrq      | 499.864    |
| solvent     | CDC13      | dn        | H1         |
| file        | exp        | dpwr      | 30         |
| ACQUISITION |            |           |            |
| sfrq        | 499.864    | dm        | nnn        |
| tn          | H1         | dmm       | c          |
| at          | 5.016      | dmf       | 200        |
| np          | 65536      | dseq      |            |
| sw          | 6533.3     | dres      | 1.0        |
| fb          | 4000       | homo      | n          |
| bs          | 4          |           |            |
| tpwr        | 61         | dfrq2     | 0          |
| pw          | 13.5       | dn2       |            |
| dl          | 0.100      | dpwr2     | 1          |
| tof         | 269.9      | dof2      | 0          |
| nt          | 16         | dm2       | n          |
| ct          | 16         | dmm2      | c          |
| alock       | n          | dmf2      | 200        |
| gain        | not used   | dseq2     |            |
|             |            | dres2     | 1.0        |
| il          | FLAGS      | homo2     | n          |
| in          | n          |           |            |
| dp          | y          | dfrq3     | 0          |
| hs          | nn         | dn3       |            |
|             |            | dpwr3     | 1          |
| sp          | 760.1      | dof3      | 0          |
| wp          | 3871.8     | dm3       | n          |
| vs          | 120        | dmm3      | c          |
| sc          | 0          | dmf3      | 200        |
| wc          | 250        | dseq3     |            |
| hzmm        | 15.49      | dres3     | 1.0        |
| is          | 400.00     | homo3     | n          |
| rfl         | 510.6      |           |            |
| rfp         | 0          | wtfile    |            |
| th          | 7          | proc      | ft         |
| ins         | 3.000      | fn        | 65536      |
| ai          | ph         | math      | f          |
|             |            | werr      |            |
|             |            | wexp      | process pH |
|             |            | wbs       |            |
|             |            | wnt       | wft        |

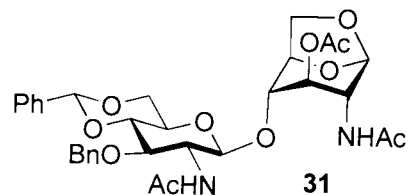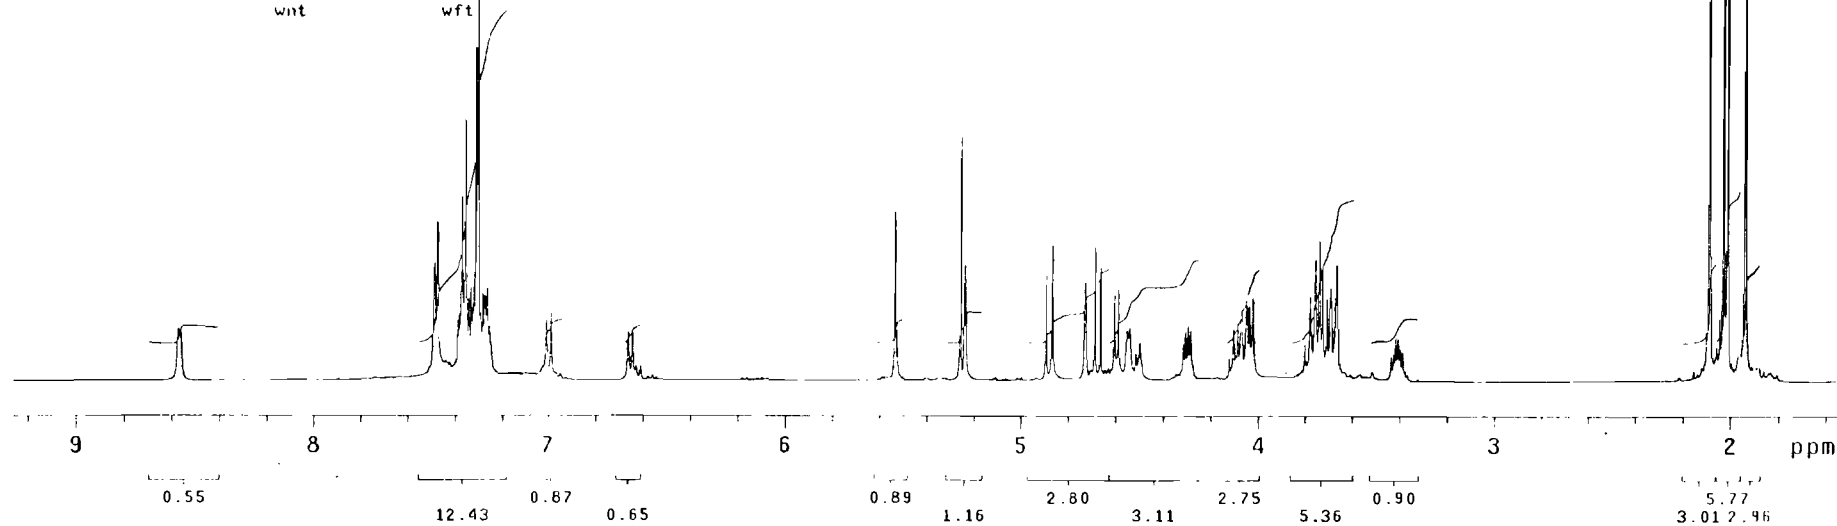

DHL-75

Pulse Sequence: relayh

Solvent: CDCl<sub>3</sub>  
Ambient temperature  
INOVA-500 "nmr2a.chem.nd.edu"

Relax. delay 1.300 sec  
COSY 90-90  
Acq. time 0.147 sec  
Width 3494.5 Hz  
2D Width 3494.5 Hz  
8 repetitions  
256 increments  
OBSERVE H1, 499.8611751 MHz  
DATA PROCESSING  
Sine bell 0.073 sec  
F1 DATA PROCESSING  
Sine bell 0.037 sec  
F1 size 1024 x 1024  
Total time 51 min, 10 sec

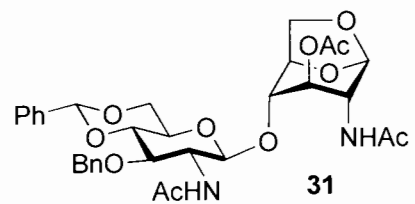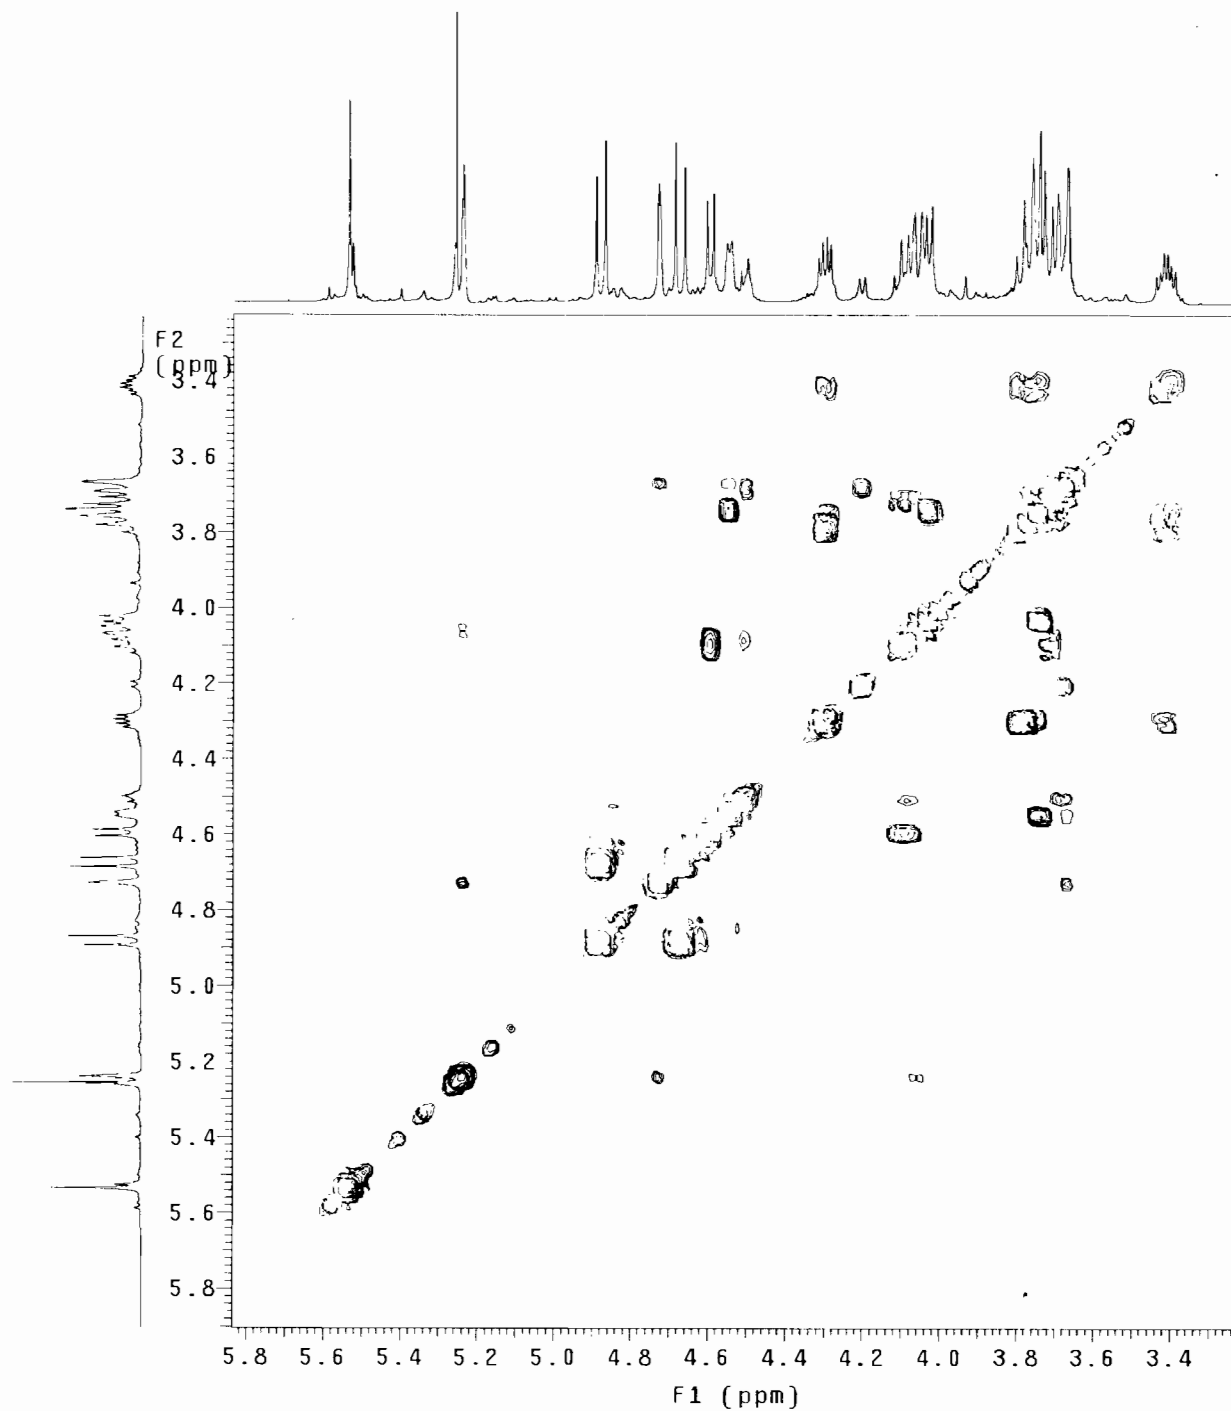

DHL-75

exp2 s2pul

| SAMPLE      |            | DEC. & VT  |         |
|-------------|------------|------------|---------|
| date        | Jun 1 2008 | dfrq       | 499.864 |
| solvent     | CDC13      | dn         | H1      |
| file        | exp        | dpwr       | 40      |
| ACQUISITION |            | dof        | 0       |
| sfrq        | 125.702    | dm         | yyy     |
| tn          | C13        | dmm        | w       |
| at          | 1.215      | dmf        | 8787.35 |
| np          | 65536      | dseq       |         |
| sw          | 26963.3    | dres       | 1.0     |
| fb          | 15000      | homo       | n       |
| bs          | 4          | DEC2       |         |
| tpwr        | 52         | dfrq2      | 0       |
| pw          | 10.2       | dn2        |         |
| dl          | 1.800      | dpwr2      | 1       |
| tof         | 144.5      | dof2       | 0       |
| nt          | 1200       | dm2        | n       |
| ct          | 284        | dmm2       | c       |
| alock       | n          | dmf2       | 10000   |
| gain        | not used   | dseq2      |         |
| FLAGS       |            | dres2      | 1.0     |
| il          | n          | homo2      | n       |
| in          | n          | DEC3       |         |
| dp          | y          | dfrq3      | 0       |
| hs          | nn         | dn3        |         |
| DISPLAY     |            | dpwr3      | 1       |
| sp          | 2250.8     | dof3       | 0       |
| wp          | 19651.8    | dm3        | n       |
| vs          | 243        | dmm3       | c       |
| sc          | 0          | dmf3       | 10000   |
| wc          | 250        | dseq3      |         |
| hzmm        | 78.61      | dres3      | 1.0     |
| is          | 500.00     | homo3      | n       |
| rfl         | 11131.2    | PROCESSING |         |
| rfp         | 9707.1     | lb         | 1.00    |
| th          | 6          | wtfile     |         |
| ins         | 100.000    | proc       | ft      |
| ai          | cdc ph     | fn         | 131072  |
|             |            | math       | f       |

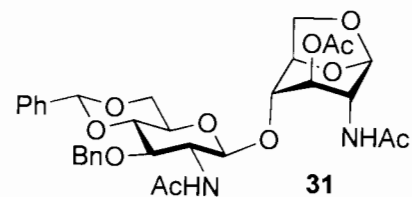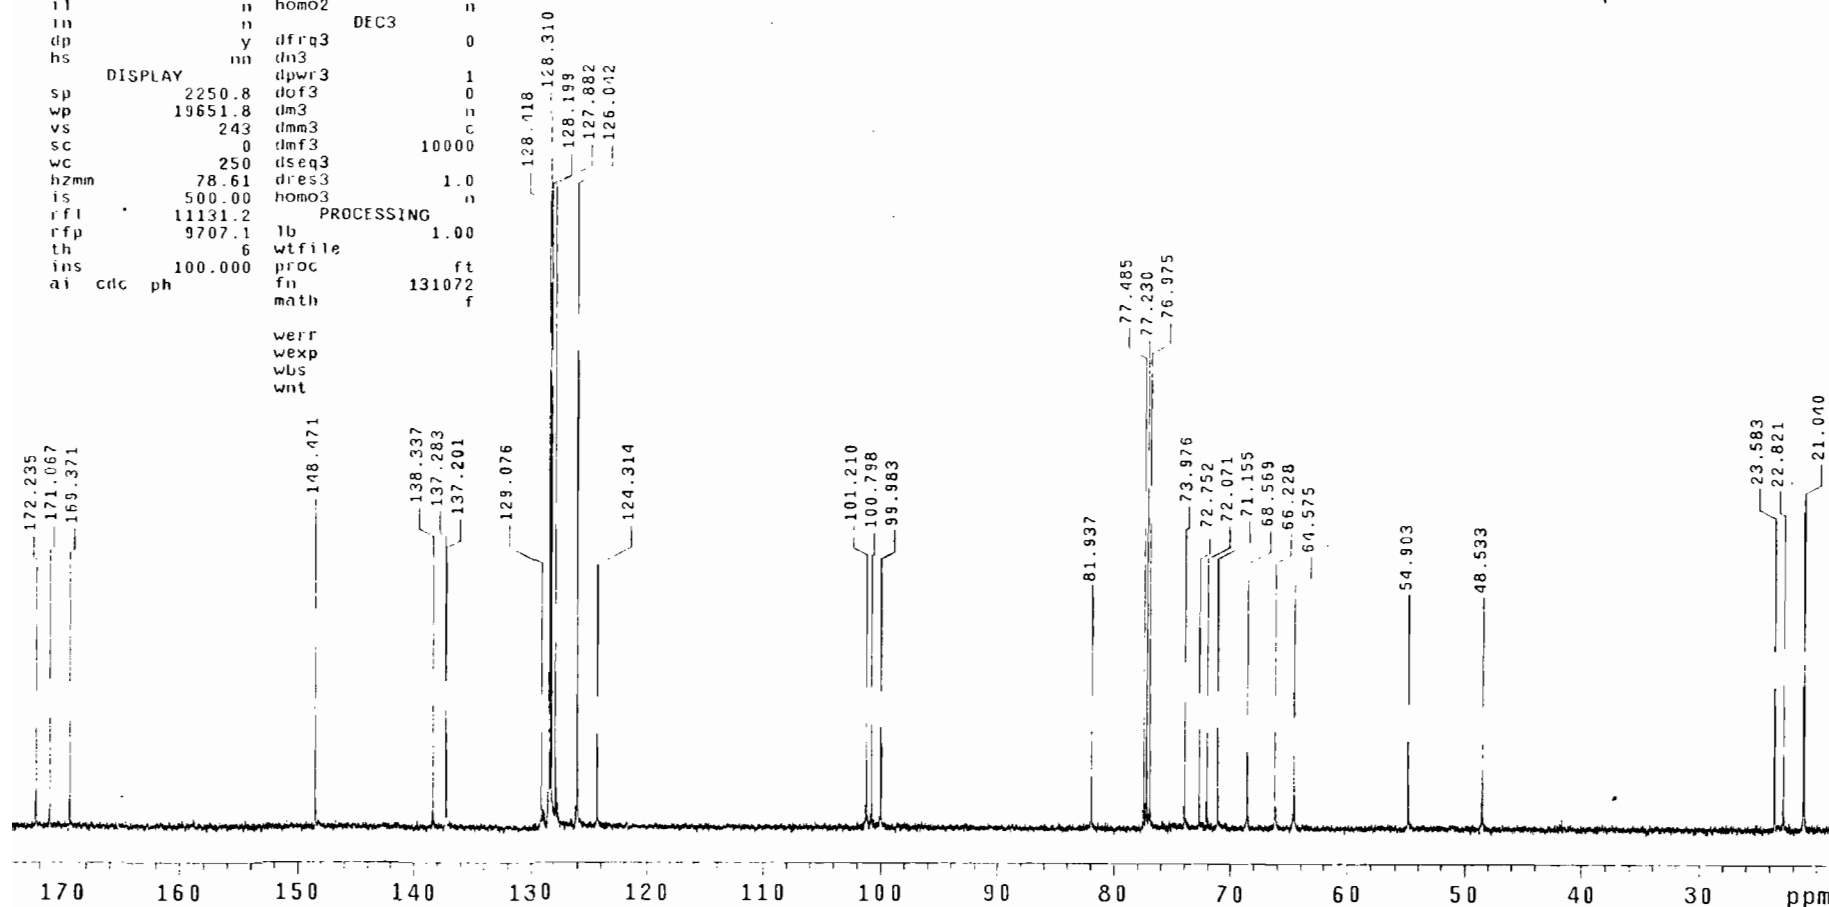

DHL-75

Pulse Sequence: dept

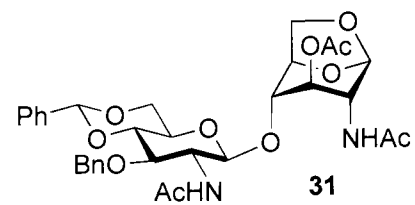

CH3 carbons

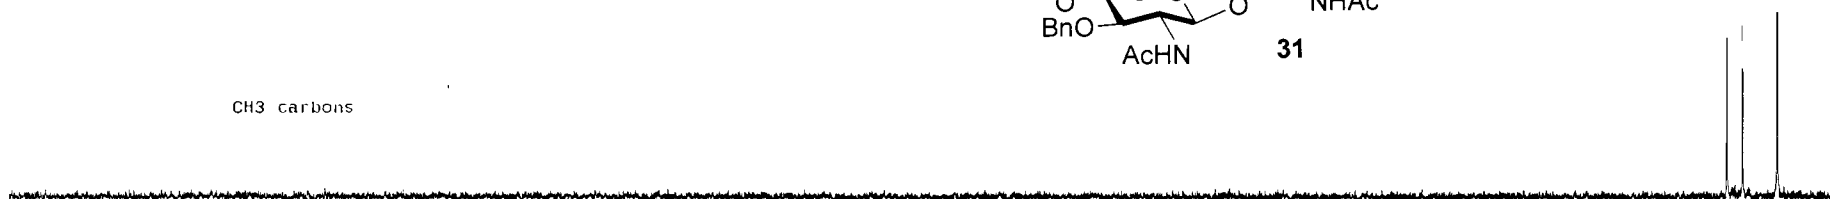

CH2 carbons

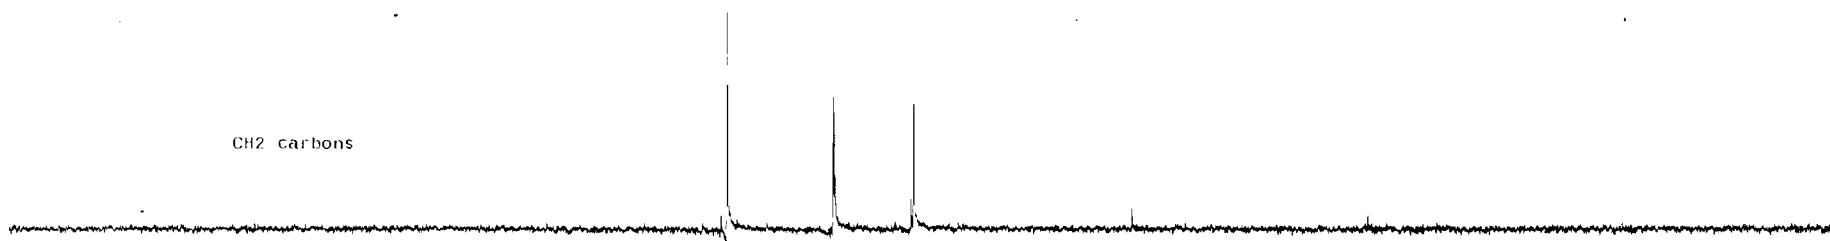

CH carbons

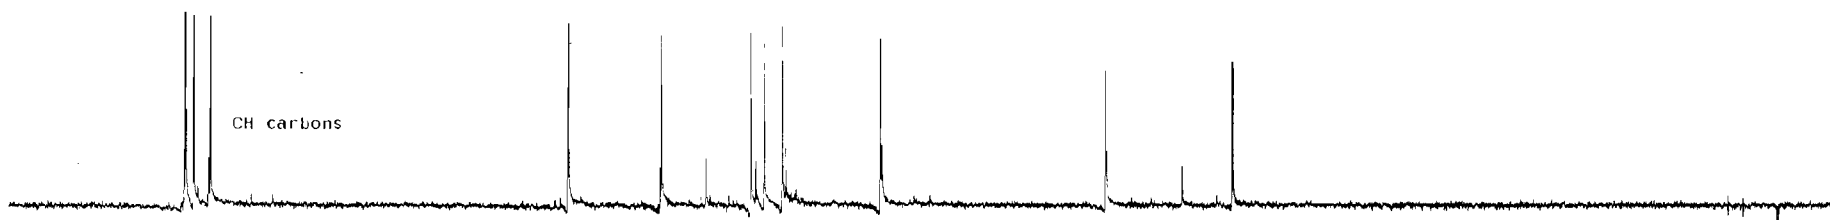

all protonated carbons

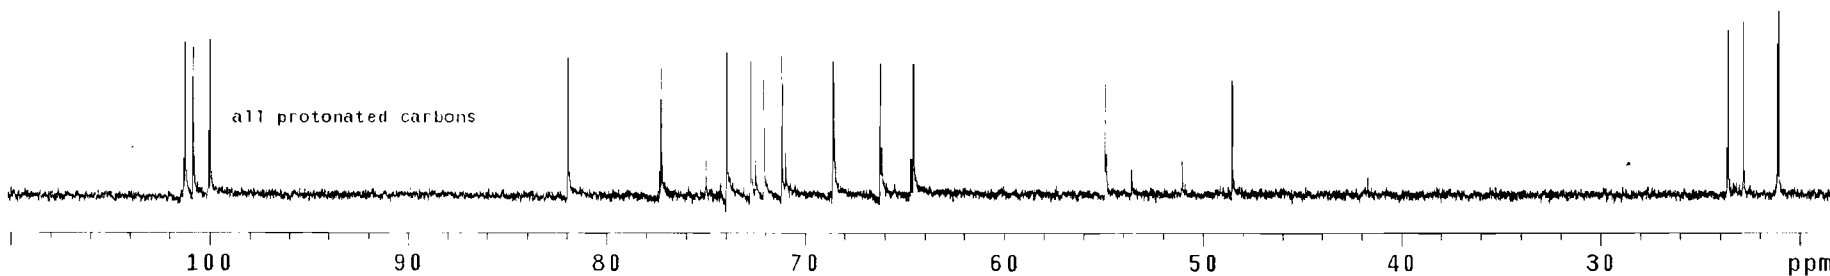

DHL-75

Pulse Sequence: hetcor

Solvent: CDCl<sub>3</sub>

Ambient temperature

User: 1-14-87

INOVA-500 "nmr2a.chem.nd.edu"

Relax. delay 1.500 sec

Acq. time 0.111 sec

Width 18403.5 Hz

2D Width 3461.4 Hz

8 repetitions

512 increments

OBSERVE C13, 125.6901883 MHz

DECOUPLE H1, 499.8637637 MHz

Power 40 dB

on during acquisition

off during delay

WALTZ-16 modulated

DATA PROCESSING

Line broadening 1.0 Hz

F1 DATA PROCESSING

Line broadening 0.3 Hz

FT size 4096 x 1024

Total time 1 hr, 56 min, 48 sec

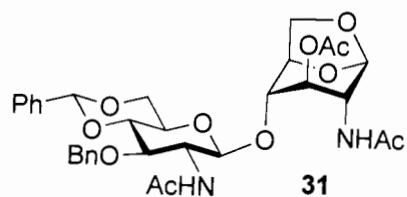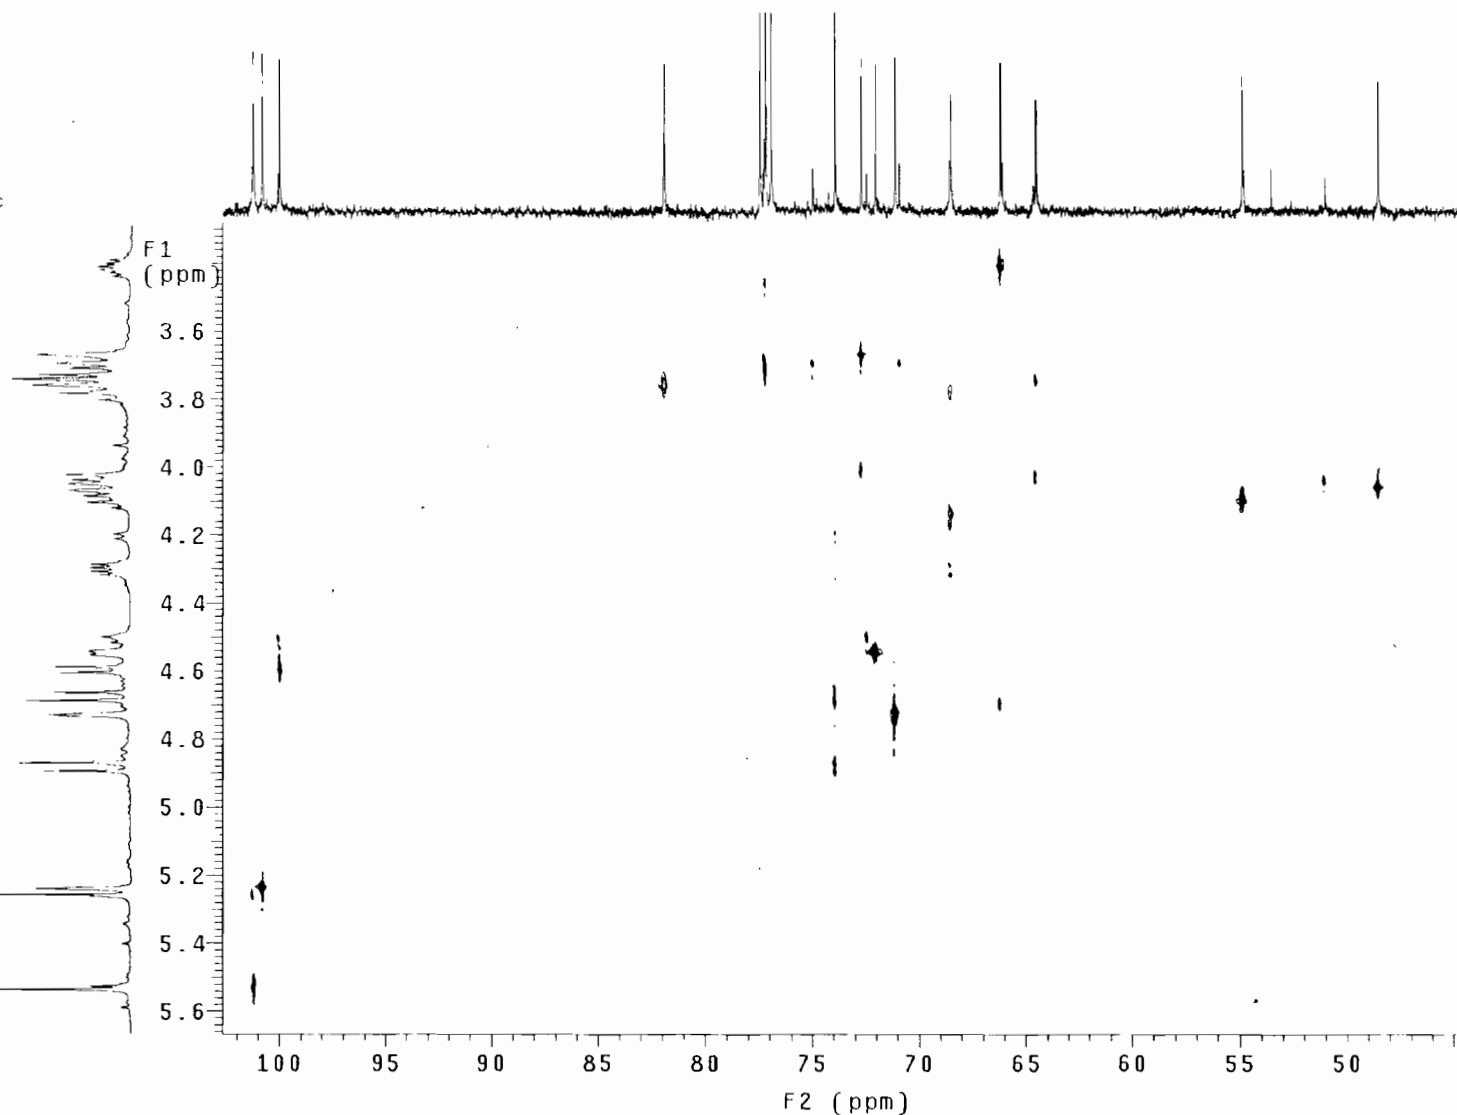

DHL-76

exp1 s2pu1

| SAMPLE      |             | DEC. & VT  |         |
|-------------|-------------|------------|---------|
| date        | Jun 13 2008 | dfrq       | 499.866 |
| solvent     | DMF         | dn         | H1      |
| file        | exp         | dpwr       | 30      |
| ACQUISITION |             | dof        | 0       |
| sfrq        | 499.866     | dm         | nnn     |
| tn          | H1          | dmm        | C       |
| at          | 5.016       | dmf        | 200     |
| np          | 90288       | dseq       |         |
| sw          | 8999.9      | dres       | 1.0     |
| fb          | 5000        | homo       | n       |
| bs          | 4           | DEC2       |         |
| tpwr        | 61          | dfrq2      | 0       |
| pw          | 13.5        | dn2        | 1       |
| dl          | 0.100       | dpwr2      | 0       |
| tof         | 269.9       | dof2       | 0       |
| nt          | 16          | dm2        | n       |
| ct          | 16          | dmm2       | C       |
| alock       | n           | dmf2       | 200     |
| gain        | not used    | dseq2      |         |
| FLAGS       |             | dres2      | 1.0     |
| il          | n           | homo2      | n       |
| in          | n           | DEC3       |         |
| dp          | y           | dfrq3      | 0       |
| hs          | nn          | dn3        | 1       |
| DISPLAY     |             | dpwr3      | 0       |
| sp          | 860.8       | dof3       | n       |
| wp          | 4919.6      | dm3        | C       |
| vs          | 158         | dmm3       | 200     |
| sc          | 0           | dmf3       |         |
| wc          | 250         | dseq3      |         |
| hzmm        | 19.68       | dres3      | 1.0     |
| is          | 200.00      | homo3      | n       |
| rfl         | -825.1      | PROCESSING |         |
| rfp         | 0           | wtfile     | ft      |
| th          | 7           | proc       | 65536   |
| ins         | 1.000       | fn         | f       |
| ai          | ph          | math       |         |

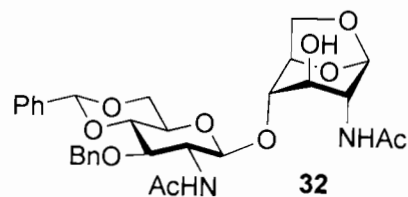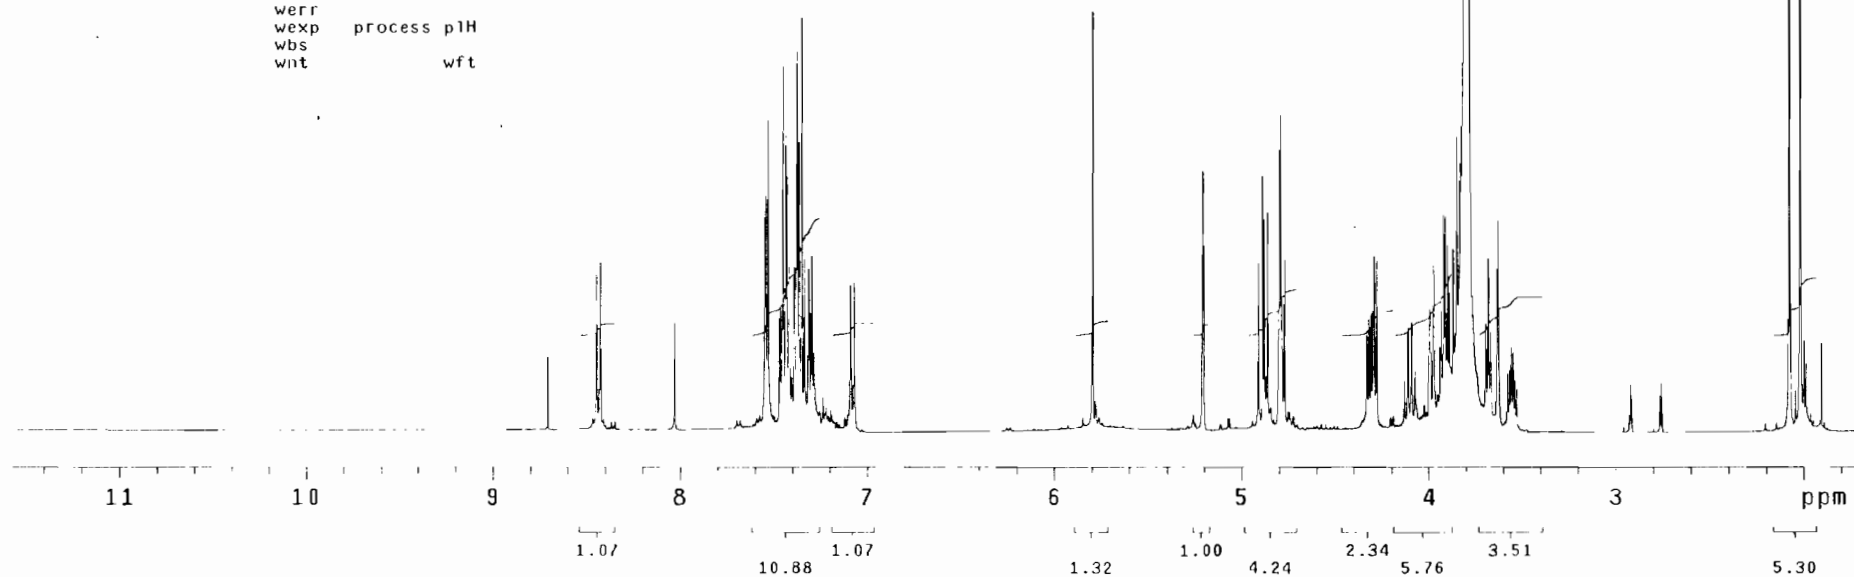

DHL-76

Pulse Sequence: relayh

Solvent: DMF

Ambient temperature

INOVA-500 "nmr2a.chem.nd.edu"

Relax. delay 1.300 sec

COSY 90-90

Acq. time 0.142 sec

Width 3606.9 Hz

2D Width 3606.9 Hz

16 repetitions

512 increments

OBSERVE H1, 499.8607706 MHz

DATA PROCESSING

Sine bell 0.071 sec

F1 DATA PROCESSING

Sine bell 0.035 sec

FT size 1024 x 1024

Total time 3 hr, 28 min, 9 sec

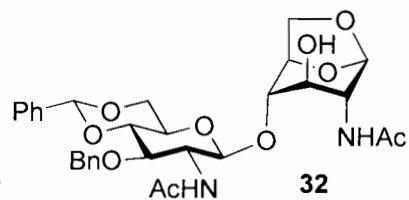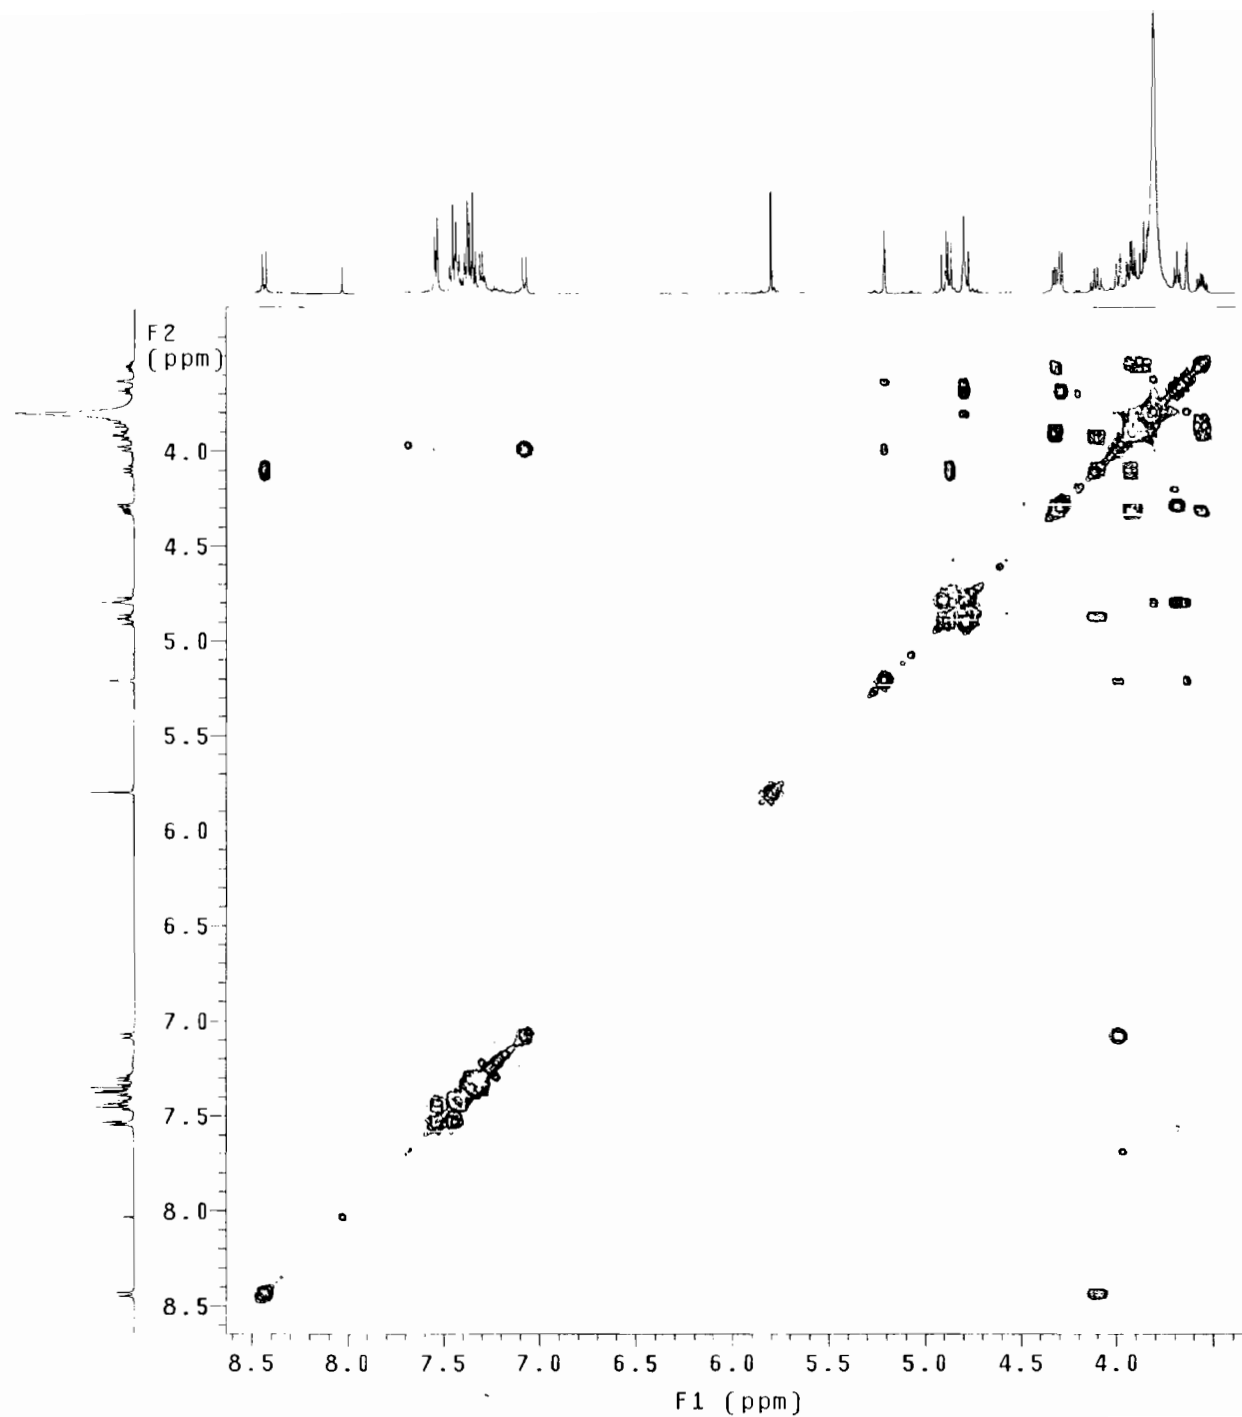

DHL-76

Pulse Sequence: relayh

Solvent: DMF  
Ambient temperature  
INOVA-500 "nmr2a.chem.nd.edu"

Relax. delay 1.300 sec  
COSY 90-90  
Acq. time 0.142 sec  
Width 3606.9 Hz  
2D Width 3606.9 Hz  
16 repetitions  
512 increments  
OBSERVE H1, 499.8607706 MHz  
DATA PROCESSING  
Sine bell 0.071 sec  
F1 DATA PROCESSING  
Sine bell 0.035 sec  
FF size 1024 x 1024  
Total time 3 hr, 28 min, 9 sec

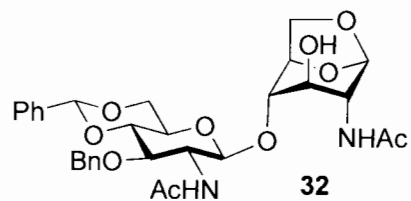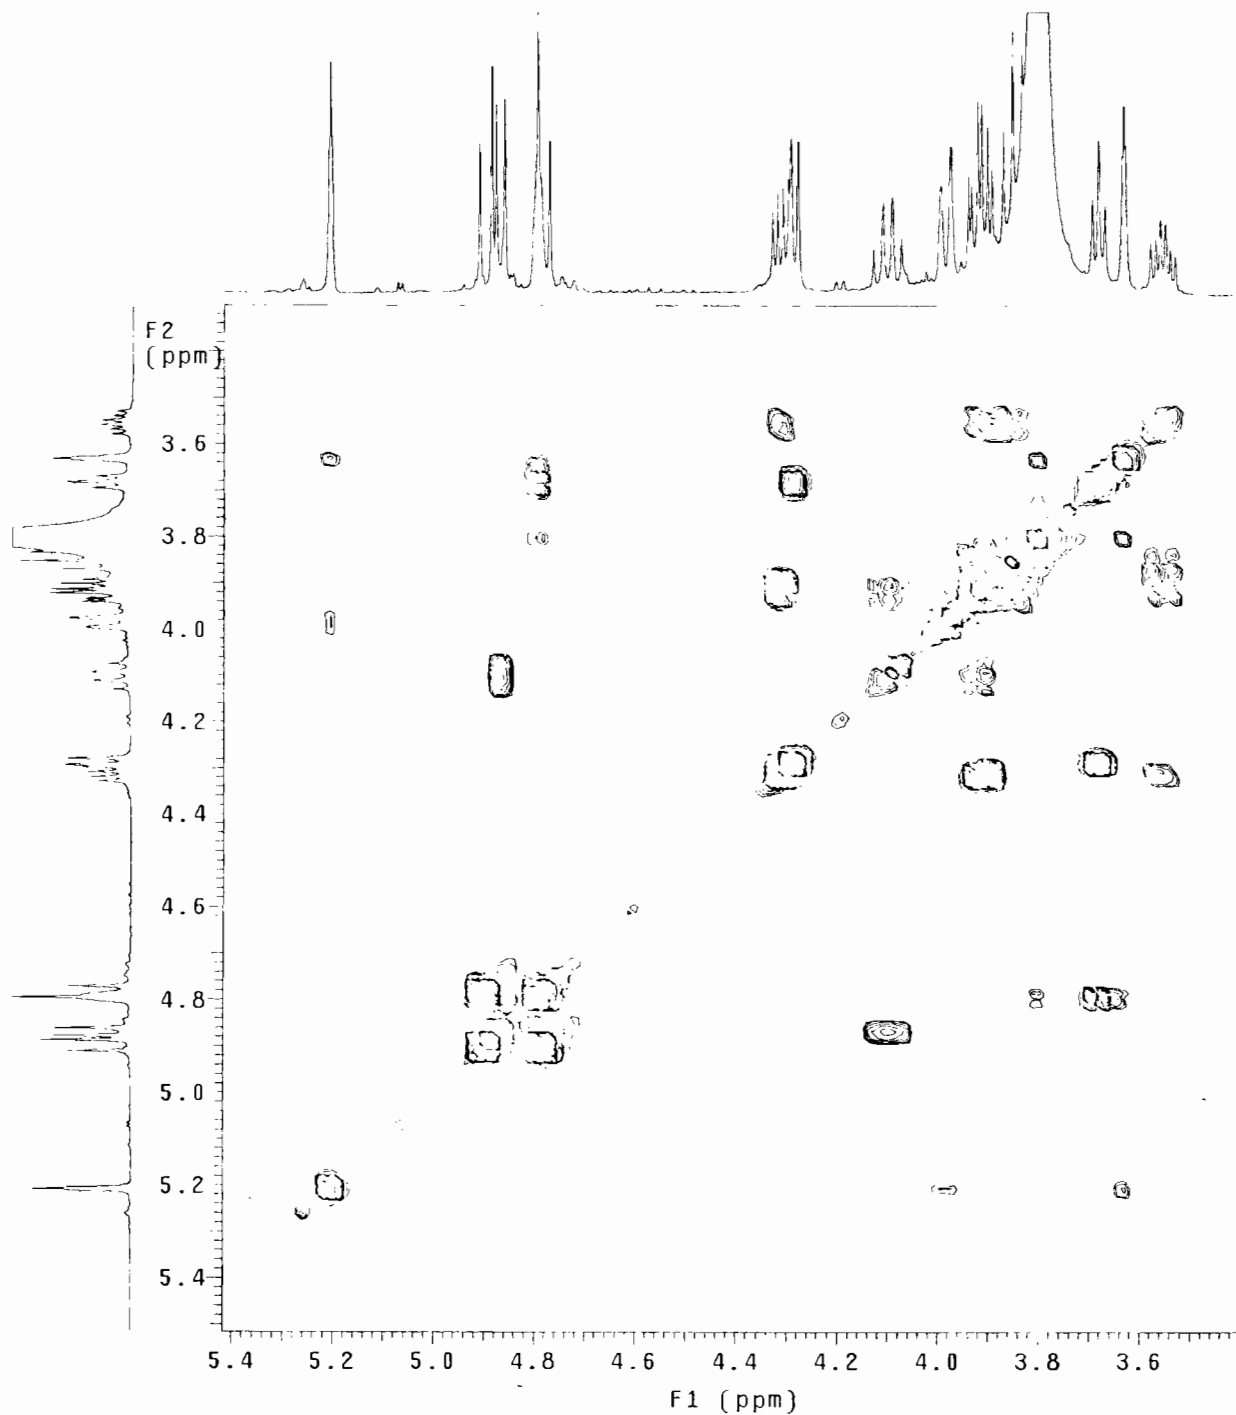

DHL-76

exp2 s2pu1

| SAMPLE      |             | DEC. & VT  |         |
|-------------|-------------|------------|---------|
| date        | Jun 13 2008 | dfrq       | 499.866 |
| solvent     | DMF         | dn         | H1      |
| file        | exp         | dpwr       | 40      |
| ACQUISITION |             | dof        | 0       |
| sfrq        | 125.703     | dm         | yyy     |
| tn          | C13         | dmm        | w       |
| at          | 1.215       | dmf        | 8787.35 |
| np          | 65536       | dseq       |         |
| sw          | 26963.3     | dres       | 1.0     |
| fb          | 15000       | homo       | n       |
| bs          | 4           | DEC2       |         |
| tpwr        | 52          | dfrq2      | 0       |
| pw          | 10.2        | dn2        |         |
| d1          | 1.800       | dpwr2      | 1       |
| tof         | 144.5       | dof2       | 0       |
| nt          | 6000        | dm2        | n       |
| ct          | 6000        | dmm2       | c       |
| alock       | n           | dmf2       | 10000   |
| gain        | not used    | dseq2      |         |
| FLAGS       |             | dies2      | 1.0     |
| il          | n           | homo2      | n       |
| in          | n           | DEC3       |         |
| dp          | y           | dfrq3      | 0       |
| hs          | nn          | dn3        |         |
| DISPLAY     |             | dpwr3      | 1       |
| sp          | 2274.7      | dof3       | 0       |
| wp          | 22852.7     | dm3        | n       |
| vs          | 191         | dmm3       | c       |
| sc          | 0           | dmf3       | 10000   |
| wc          | 250         | dseq3      |         |
| hzmm        | 91.41       | dies3      | 1.0     |
| is          | 500.00      | homo3      | n       |
| rfl         | 772.7       | PROCESSING |         |
| rpf         | 0           | lb         | 1.00    |
| th          | 2           | wtfile     |         |
| ins         | 100.000     | proc       | ft      |
| ai          | cdc ph      | fn         | 131072  |
|             |             | math       | f       |

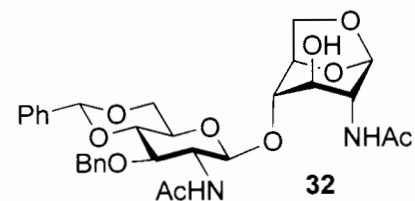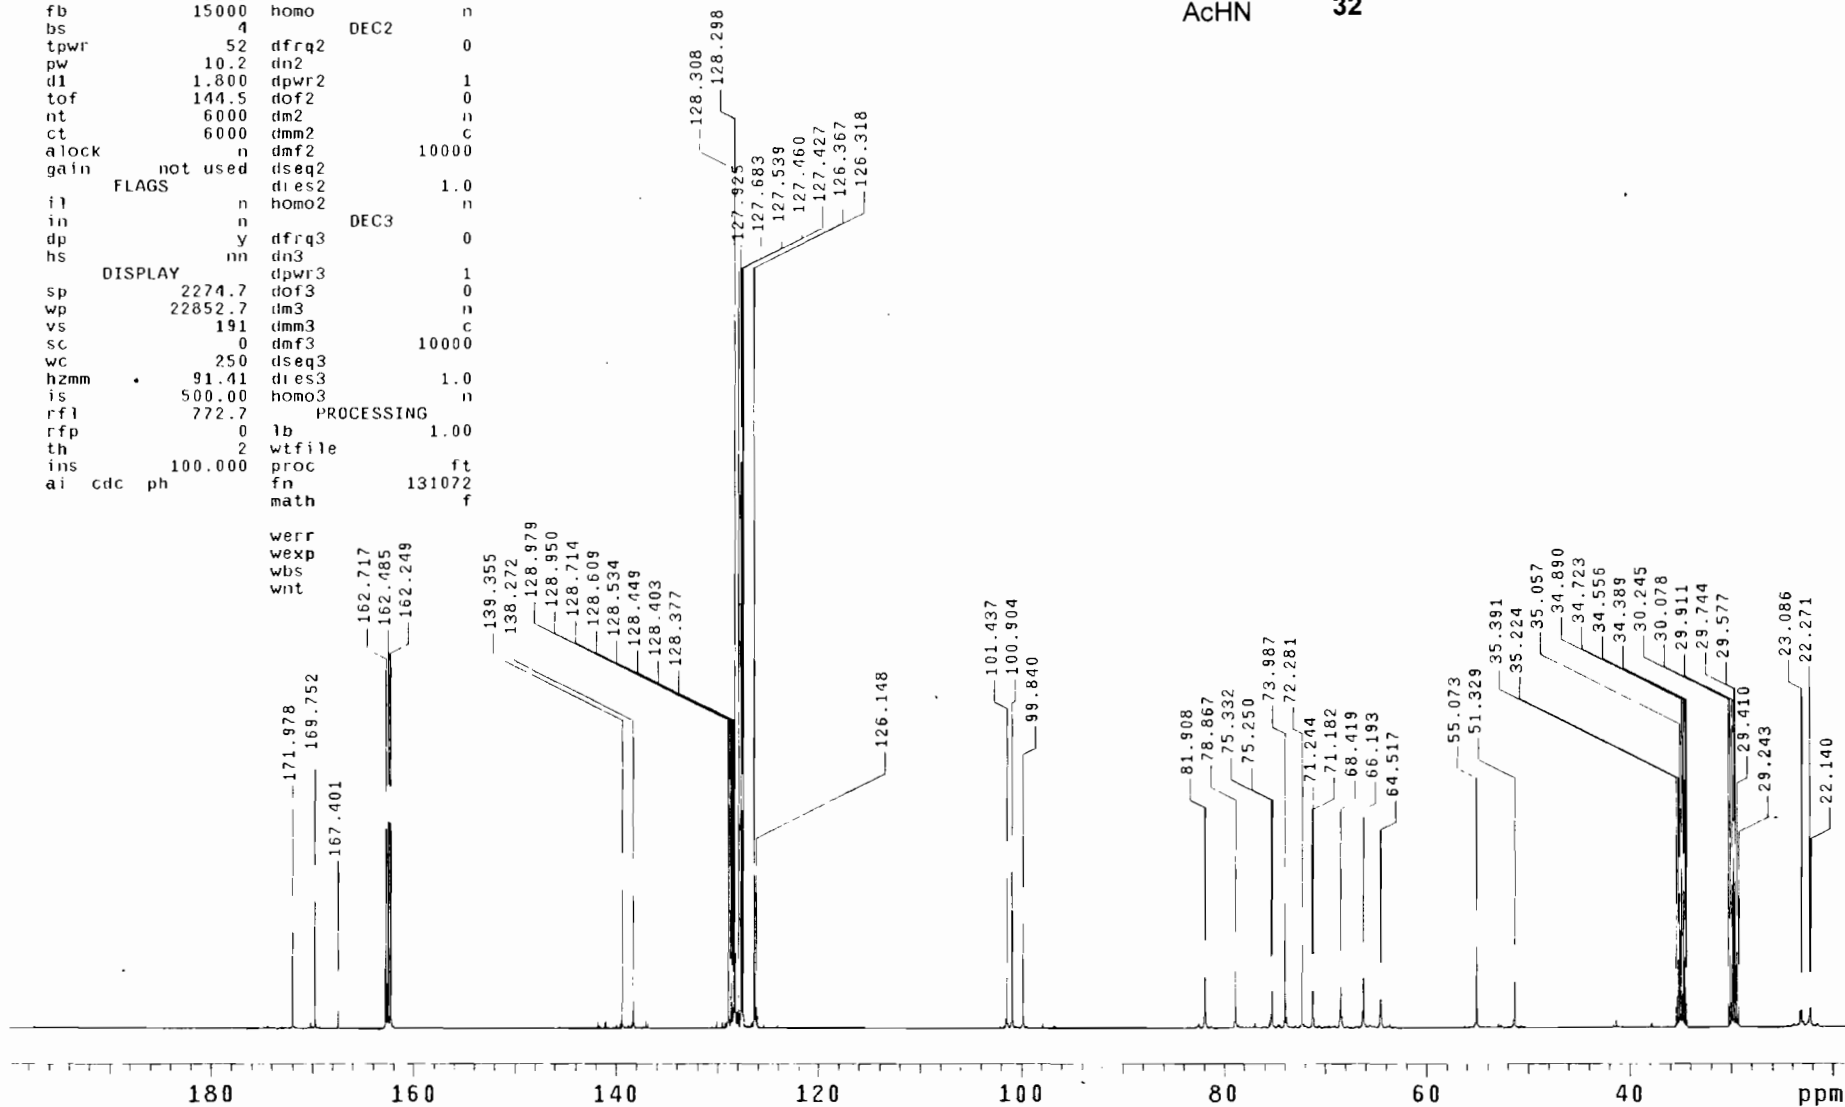

DHL-76

Pulse Sequence: dept

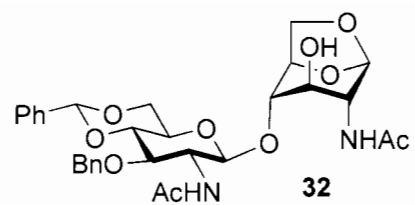

CH3 carbons

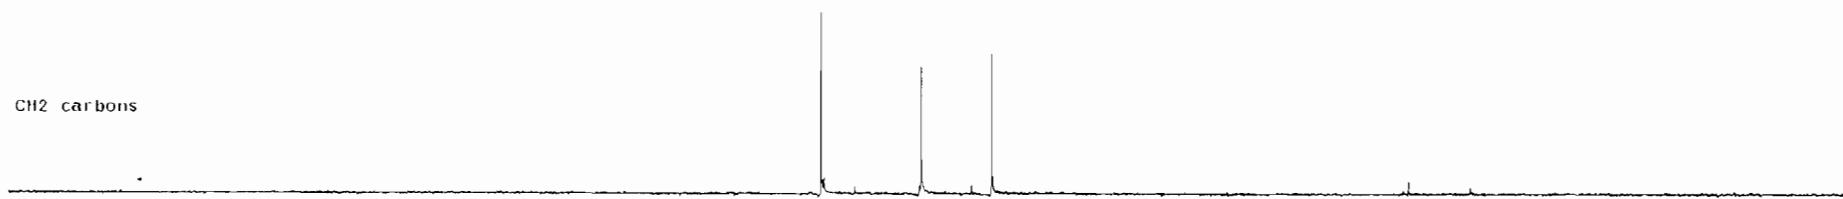

CH2 carbons

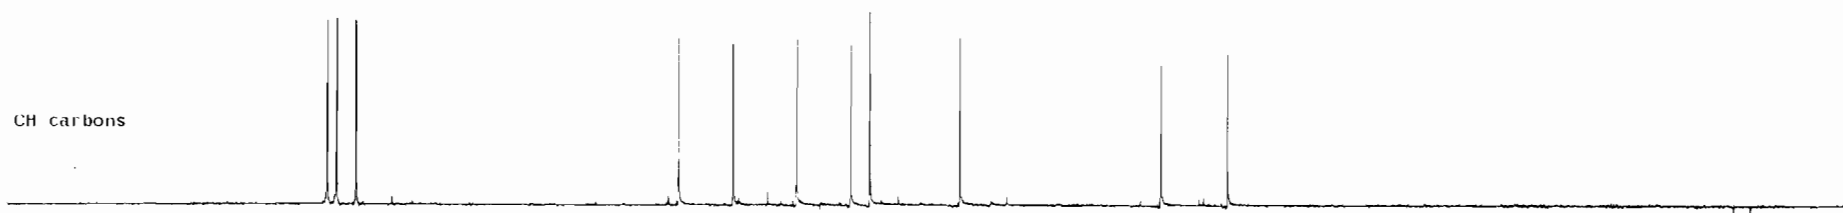

CH carbons

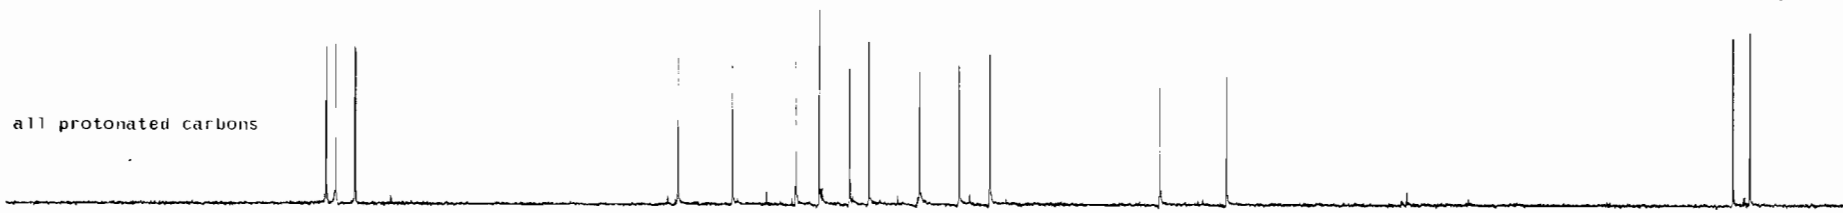

all protonated carbons

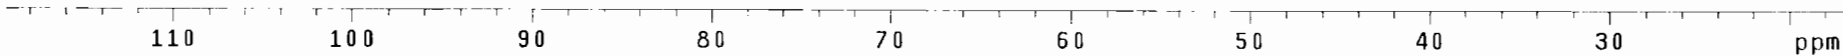

DHL-76

Pulse Sequence: hetcor

Solvent: DMF

Ambient temperature

User: 1-14-87

INOVA-500 "nmr2a.chem.nd.edu"

Relax. delay 1.500 sec

Acq. time 0.111 sec

Width 18403.5 Hz

2D Width 3534.8 Hz

16 repetitions

512 increments

OBSERVE C13, 125.6900811 MHz

DECOUPLE H1, 499.8634194 MHz

Power 40 dB

on during acquisition

off during delay

WALTZ-16 modulated

DATA PROCESSING

Line broadening 1.0 Hz

F1 DATA PROCESSING

Line broadening 0.3 Hz

FT size 4096 x 1024

Total time 3 hr, 53 min, 17 sec

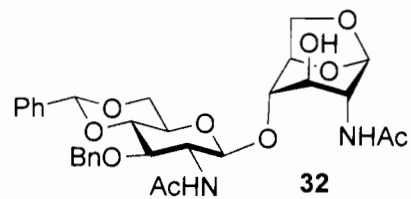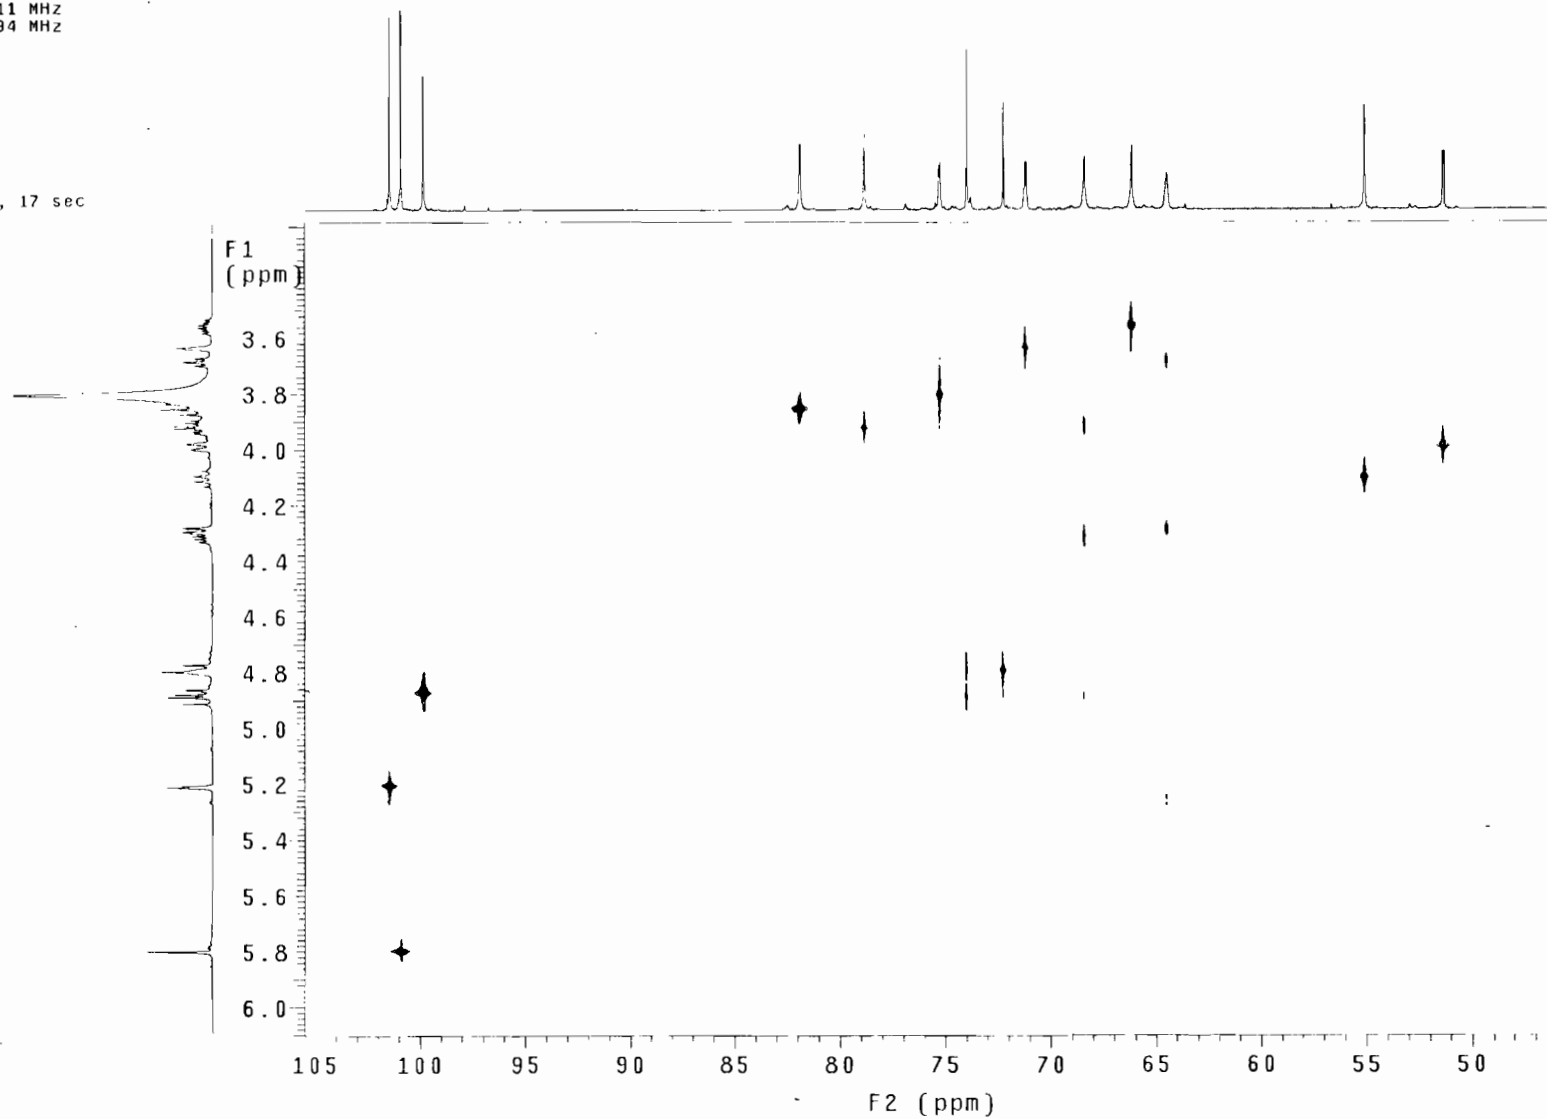

DHL-82

exp1 s2pu1

| SAMPLE      |             | DEC. & VT  |            |
|-------------|-------------|------------|------------|
| date        | Jun 16 2008 | dfrq       | 499.866    |
| solvent     | CD3CN       | dn         | H1         |
| file        | exp         | dpwr       | 30         |
| ACQUISITION |             | dof        | 0          |
| sfrq        | 499.867     | dm         | nm         |
| tn          | H1          | dmm        | c          |
| at          | 5.016       | dmf        | 200        |
| np          | 65536       | dseq       |            |
| sw          | 6533.3      | dres       | 1.0        |
| fb          | 4000        | homo       | n          |
| bs          | 4           | DEC2       |            |
| tpwr        | 61          | dfrq2      | 0          |
| pw          | 13.5        | dn2        |            |
| d1          | 0.100       | dpwr2      | 1          |
| tof         | 269.9       | dof2       | 0          |
| nt          | 16          | dm2        | n          |
| ct          | 16          | dmm2       | c          |
| alock       | n           | dmf2       | 200        |
| gain        | not used    | dseq2      |            |
| FLAGS       |             | dres2      | 1.0        |
| il          | n           | homo2      | n          |
| in          | n           | DEC3       |            |
| dp          | y           | dfrq3      | 0          |
| hs          | nn          | dn3        |            |
| DISPLAY     |             | dpwr3      | 1          |
| sp          | 506.4       | dof3       | 0          |
| wp          | 4764.6      | dm3        | n          |
| vs          | 114         | dmm3       | c          |
| sc          | 0           | dmf3       | 200        |
| wc          | 250         | dseq3      |            |
| hzmm        | 19.06       | dres3      | 1.0        |
| is          | 143.64      | homo3      | n          |
| rfl         | 1493.6      | PROCESSING |            |
| rfp         | 969.7       | wtfile     |            |
| th          | 7           | proc       | ft         |
| ins         | 3.000       | fn         | 65536      |
| ai          | ph          | math       | f          |
|             |             | werr       |            |
|             |             | wexp       | process pH |
|             |             | wbs        |            |
|             |             | wnt        | wft        |

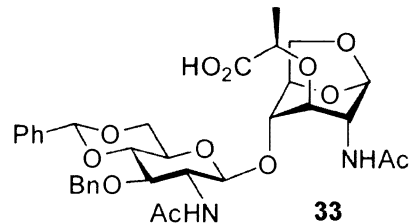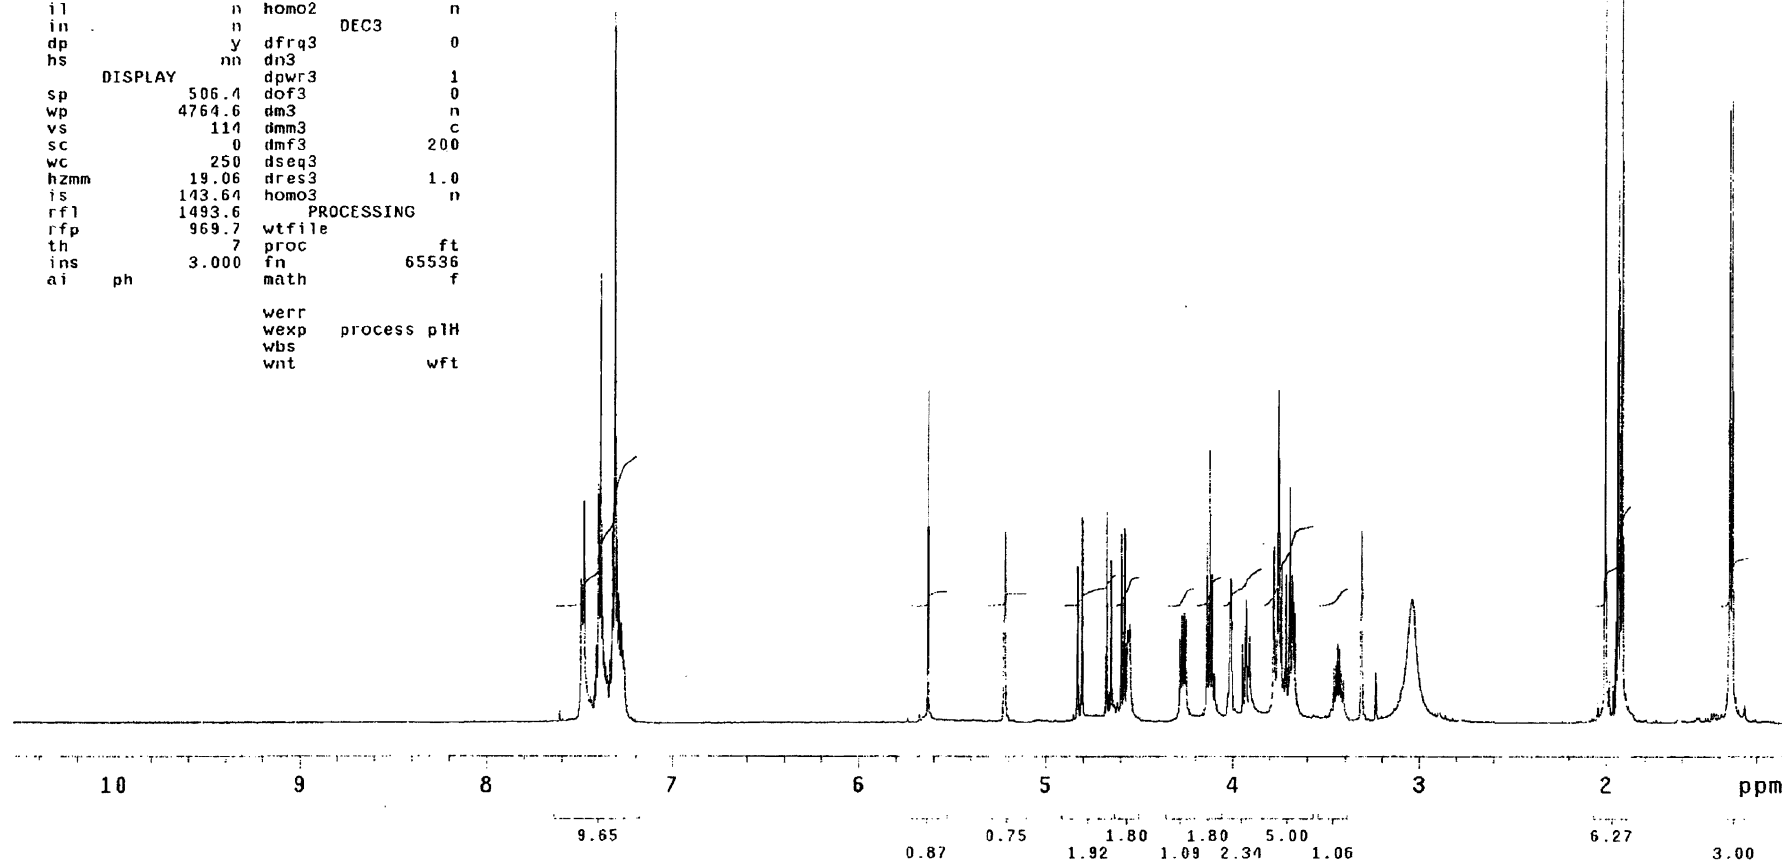

OHL-82

Pulse Sequence: relayh

Solvent: CD3CN

Ambient temperature

INOVA-500 "nmr2a.chem.nd.edu"

Relax. delay 1.300 sec

COSY 90-90

Acq. time 0.138 sec

Width 3708.5 Hz

2D Width 3708.5 Hz

16 repetitions

512 increments

OBSERVE H1, 499.8638327 MHz

DATA PROCESSING

Sine bell 0.069 sec

F1 DATA PROCESSING

Sine bell 0.035 sec

FT size 1024 x 1024

Total time 3 hr, 27 min, 21 sec

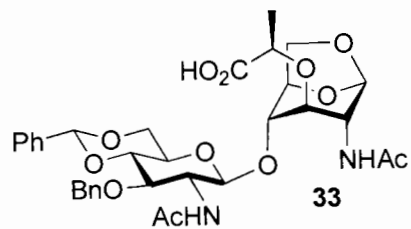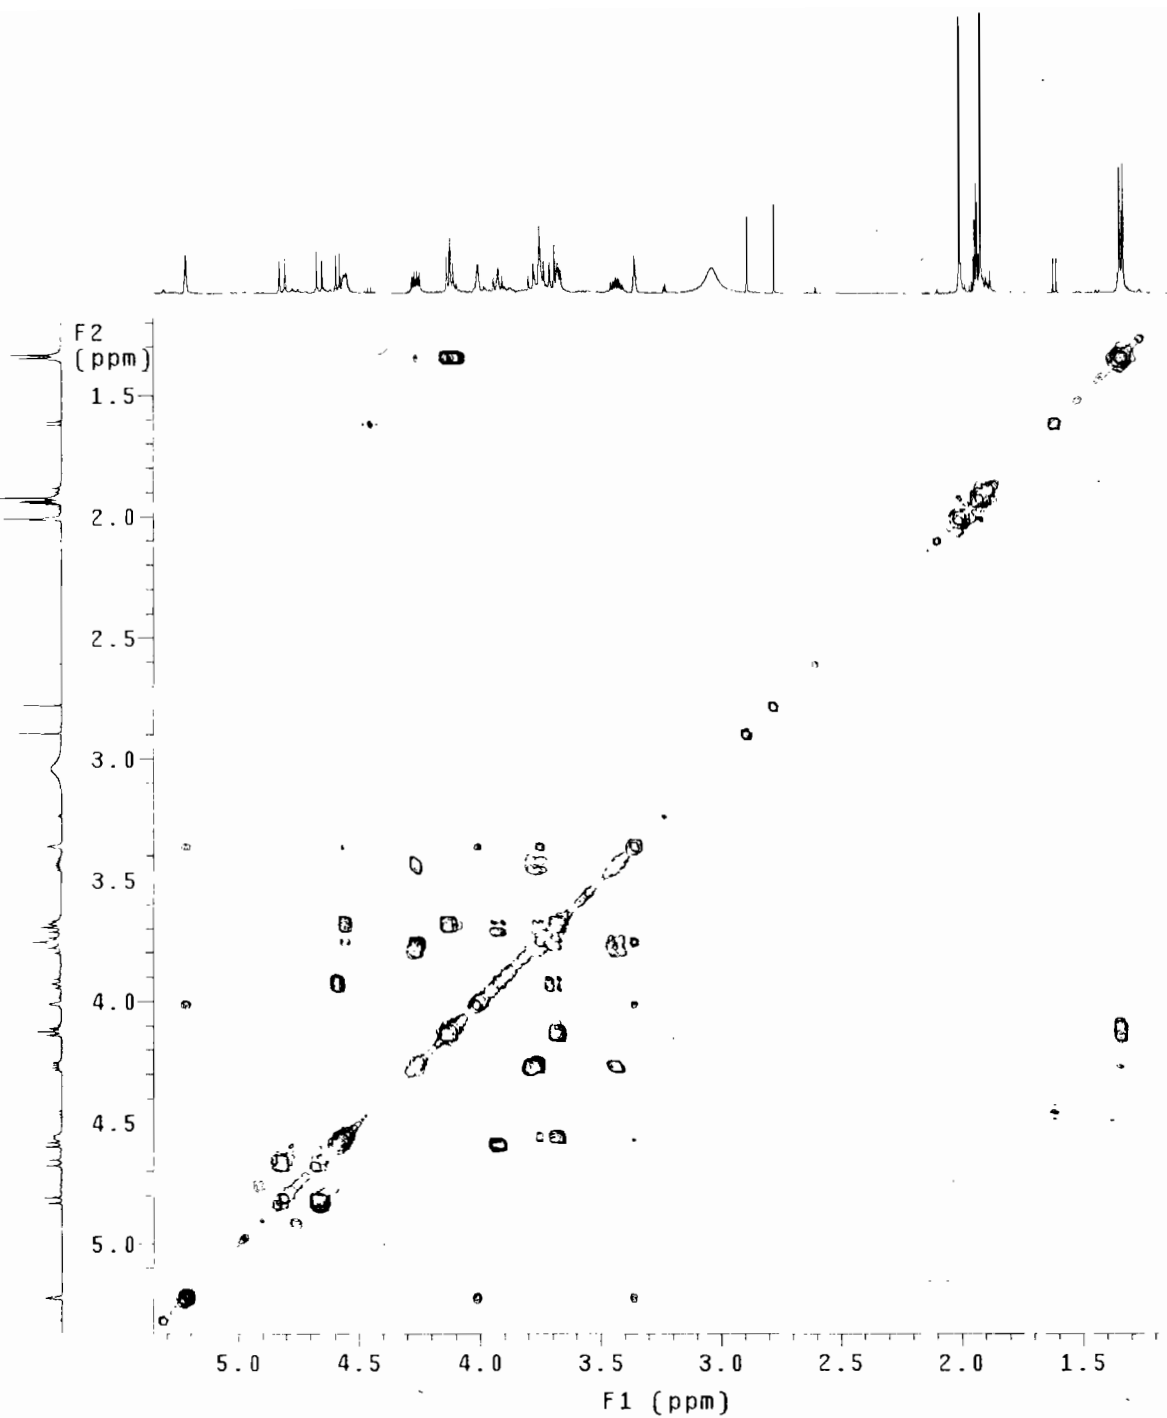

DHL-82

Pulse Sequence: relayh

Solvent: CD3CN

Ambient temperature

INOVA-500 "nmr2a.chem.nd.edu"

Relax. delay 1.300 sec

COZY 90-90

Acq. time 0.138 sec

Width 3708.5 Hz

2D Width 3708.5 Hz

16 repetitions

512 increments

OBSERVE H1, 499.8638327 MHz

DATA PROCESSING

Sine bell 0.069 sec

F1 DATA PROCESSING

Sine bell 0.035 sec

FT size 1024 x 1024

Total time 3 hr, 27 min, 21 sec

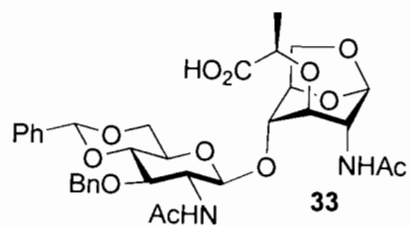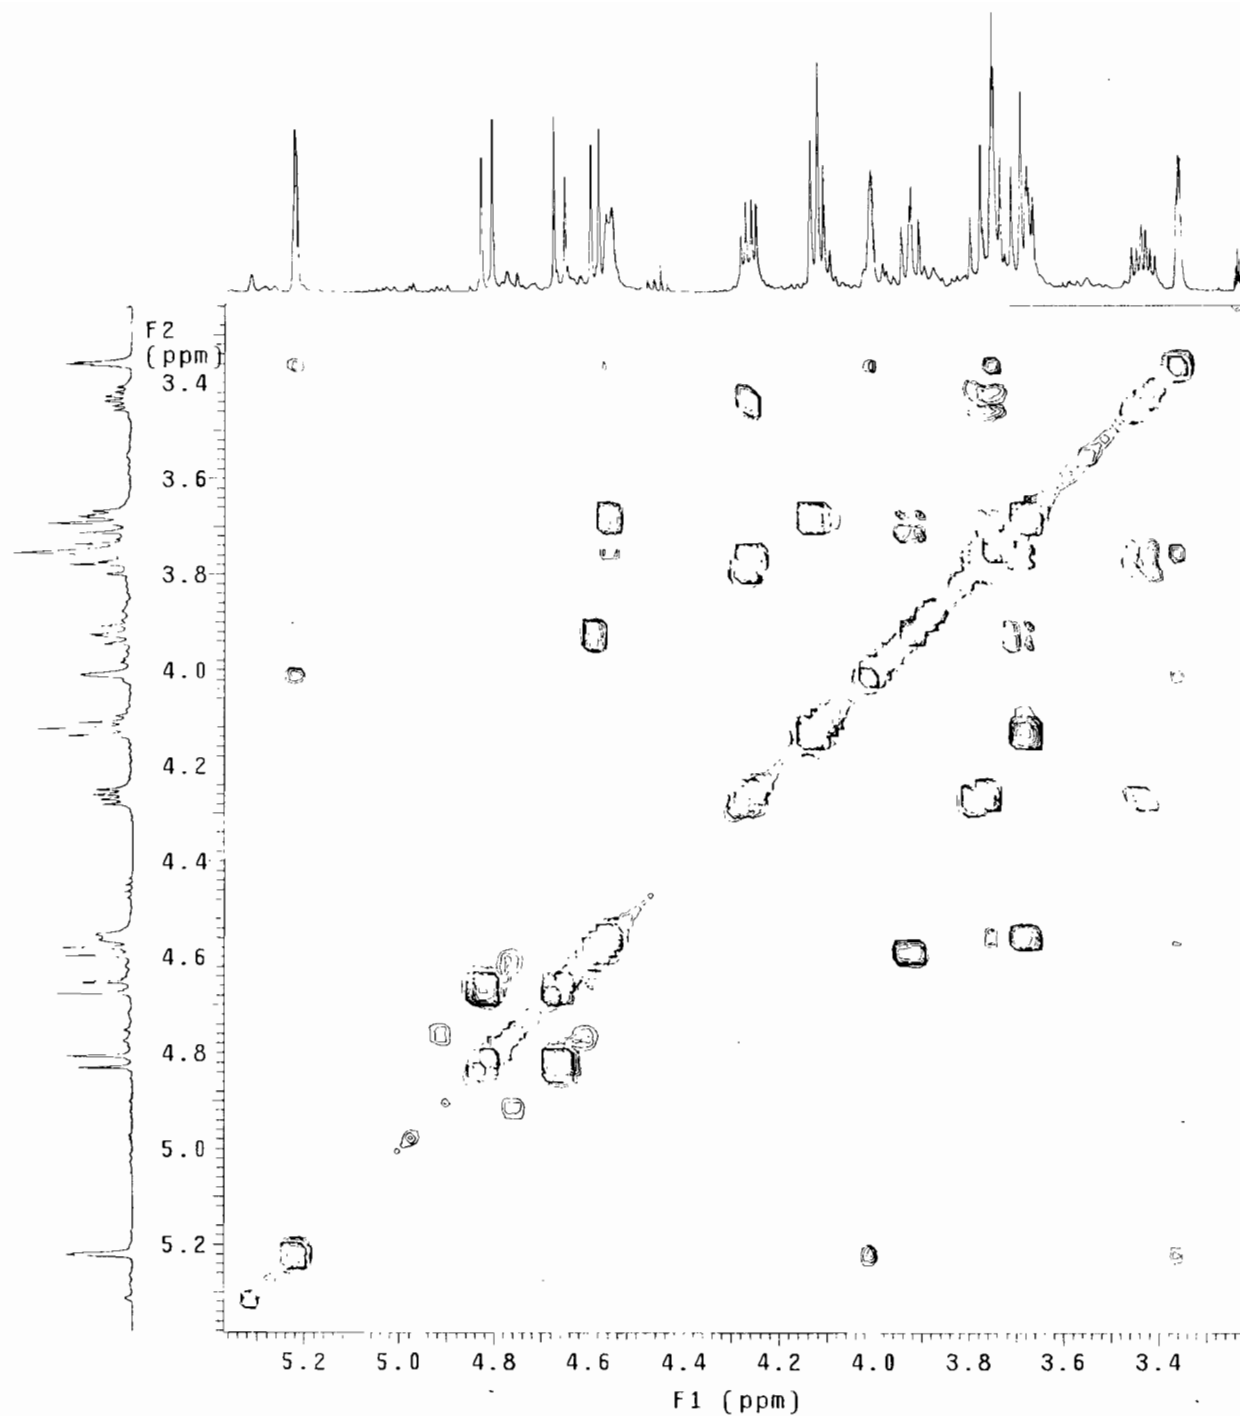

DHL-82

exp7 s2pu1

| SAMPLE      |             | DEC. & VT  |         |
|-------------|-------------|------------|---------|
| date        | Jun 16 2008 | dfrq       | 499.866 |
| solvent     | cd3cn       | dn         | H1      |
| file        | exp         | dpwr       | 40      |
| ACQUISITION |             | dof        | 0       |
| sfrq        | 125.703     | dm         | yyy     |
| tn          | C13         | dmm        | w       |
| at          | 1.215       | dmf        | 8787.35 |
| np          | 65536       | dseq       |         |
| sw          | 26963.3     | dres       | 1.0     |
| fb          | 15000       | homo       | n       |
| bs          | 4           | DEC2       |         |
| tpwr        | 52          | dfrq2      | 0       |
| pw          | 10.2        | dn2        |         |
| dl          | 1.800       | dpwr2      | 1       |
| tof         | 144.5       | dof2       | 0       |
| nt          | 6000        | dm2        | n       |
| ct          | 5145        | dmm2       | c       |
| alock       | n           | dmf2       | 10000   |
| gain        | not used    | dseq2      |         |
| FLAGS       |             | dres2      | 1.0     |
| il          | n           | homo2      | n       |
| in          | n           | DEC3       |         |
| dp          | y           | dfrq3      | 0       |
| hs          | nn          | dn3        |         |
| DISPLAY     |             | dpwr3      | 1       |
| sp          | 1686.3      | dof3       | 0       |
| wp          | 21577.3     | dm3        | n       |
| vs          | 319         | dmm3       | c       |
| sc          | 0           | dmf3       | 10000   |
| wc          | 250         | dseq3      |         |
| hzmm        | 86.31       | dres3      | 1.0     |
| is          | 500.00      | homo3      | n       |
| rfl         | 1290.0      | PROCESSING |         |
| rfp         | 0           | lb         | 1.00    |
| th          | 4           | wtfile     |         |
| ins         | 100.000     | proc       | ft      |
| ai          | cdc ph      | fn         | 131072  |
|             |             | math       | f       |

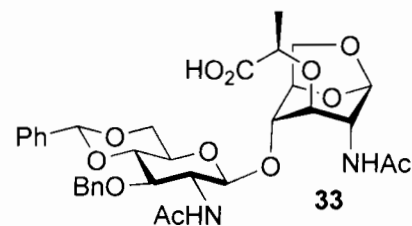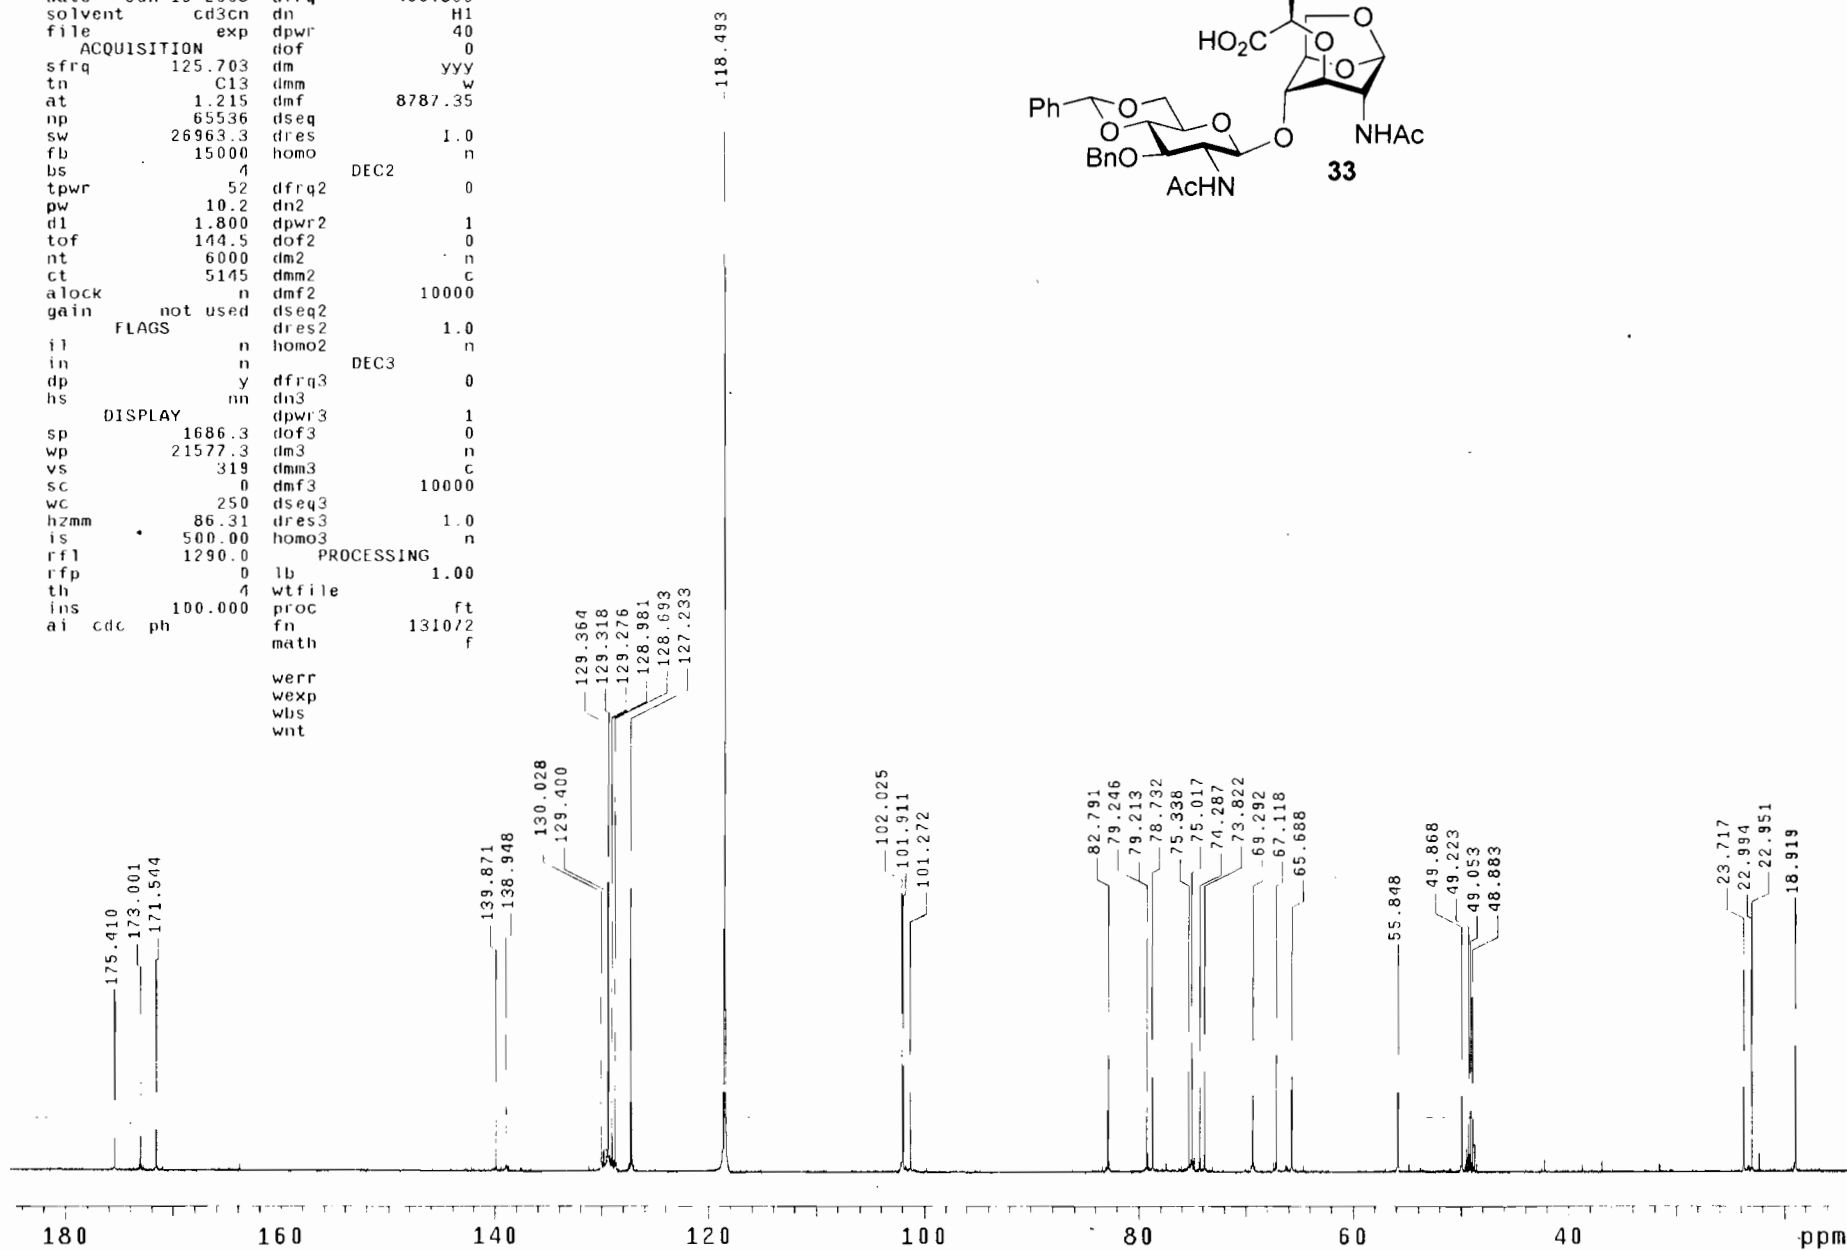

DHL-82

Pulse Sequence: dept

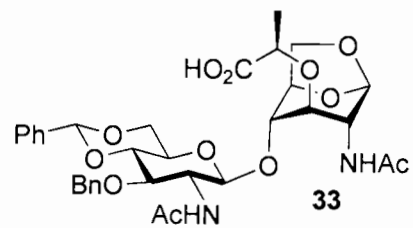

CH3 carbons

CH2 carbons

CH carbons

all protonated carbons

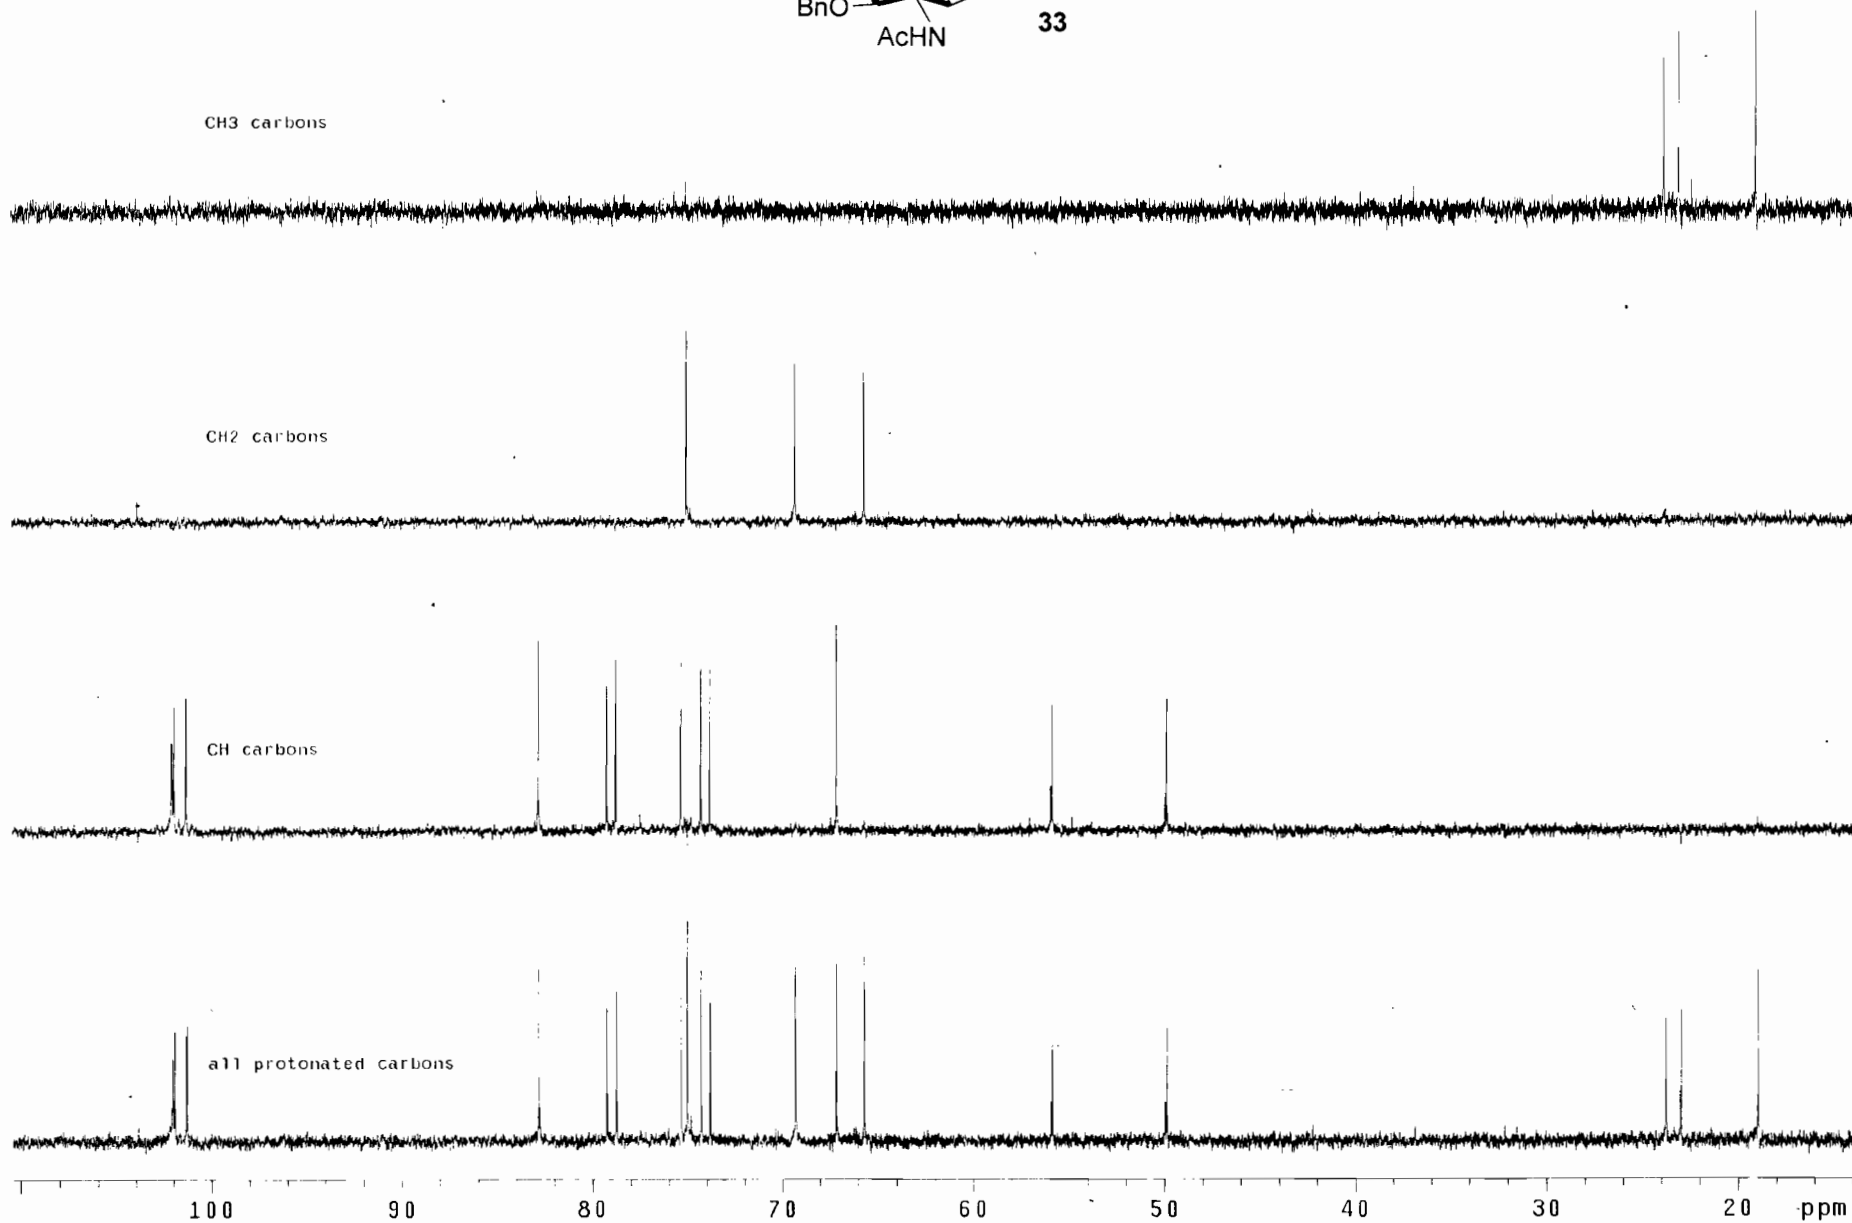

DHL-82

Pulse Sequence: hetcor

Solvent: cd3cn

Ambient temperature

User: 1-14-87

INOVA-500 "nmr2a.chem.nd.edu"

Relax. delay 1.500 sec

Acq. time 0.111 sec

Width 18403.5 Hz

2D Width 3511.2 Hz

24 repetitions

512 increments

OBSERVE C13, 125.6907190 MHz

DECOUPLE H1, 499.8660601 MHz

Power 40 dB

on during acquisition

off during delay

WALTZ-16 modulated

DATA PROCESSING

Line broadening 1.0 Hz

F1 DATA PROCESSING

Line broadening 0.3 Hz

FT size 4096 x 1024

Total time 5 hr, 49 min, 59 sec

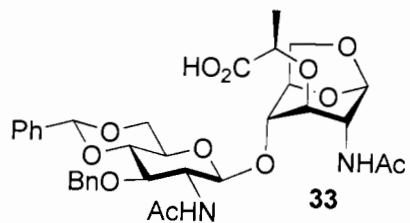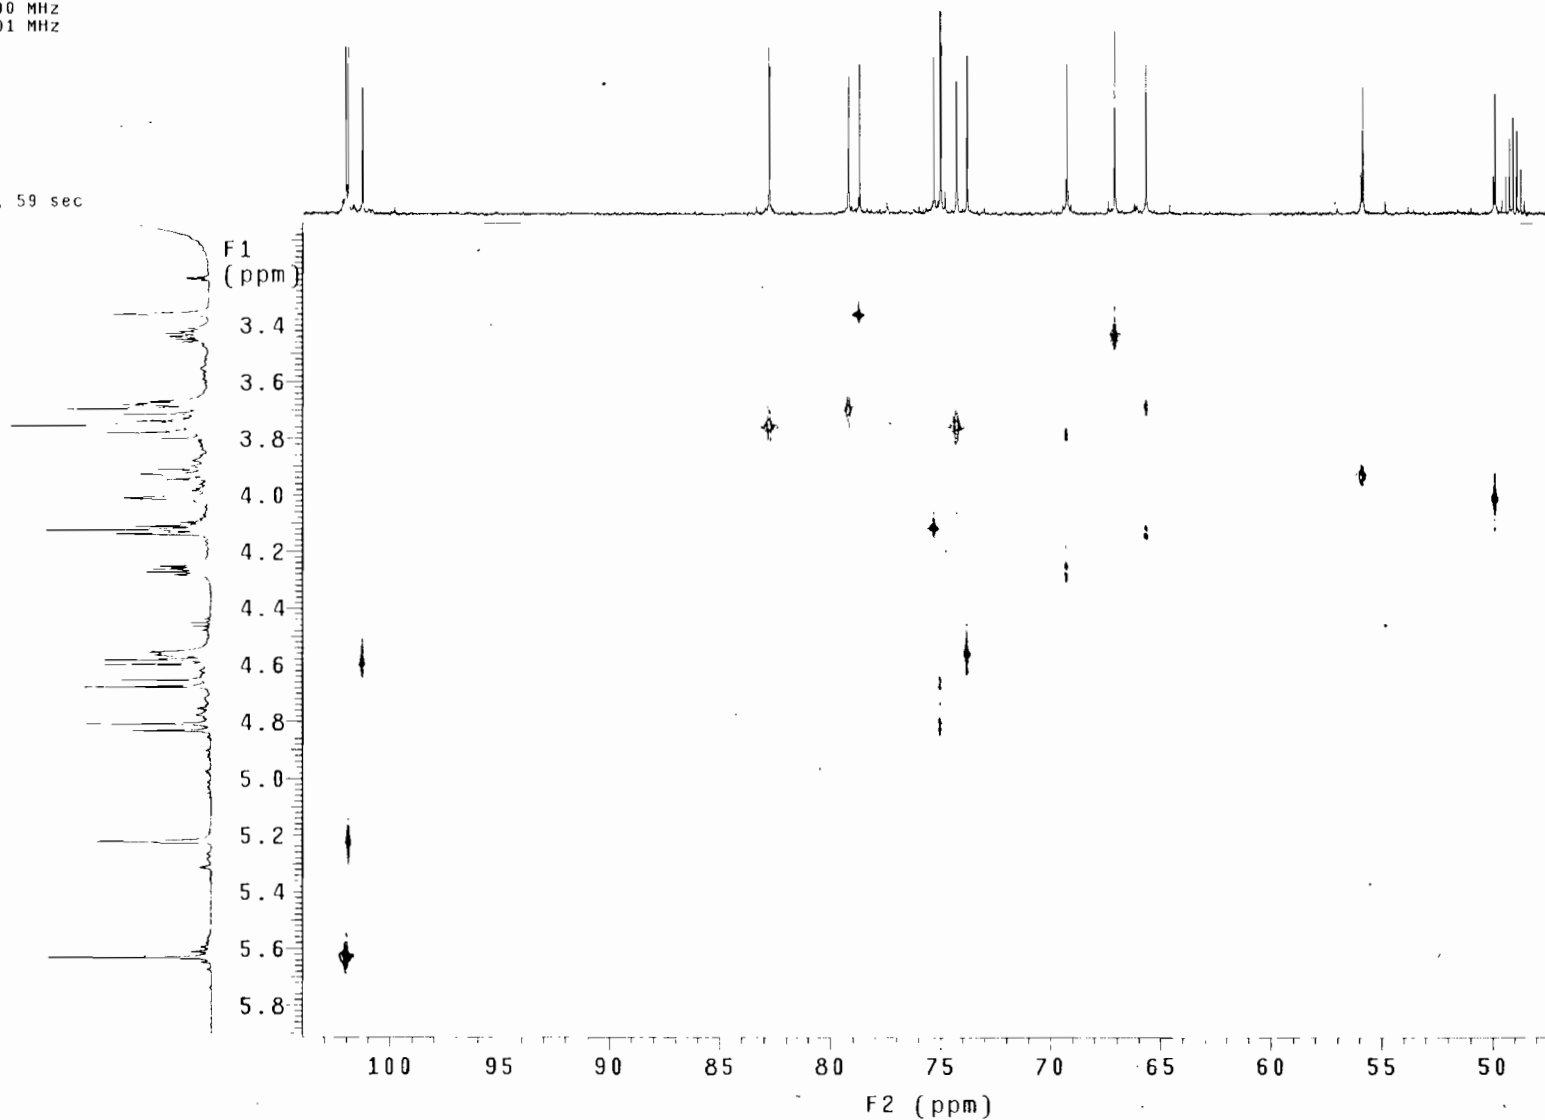

DHL-88

expl s2pu1

| SAMPLE      |             | DEC. & VT  |             |
|-------------|-------------|------------|-------------|
| date        | Jul 17 2008 | dfrq       | 499.866     |
| solvent     | CD3CN       | dn         | H1          |
| file        | exp         | dpwr       | 30          |
| ACQUISITION |             | dof        | 0           |
| sfrq        | 499.867     | dm         | nnn         |
| tn          | H1          | dmm        | c           |
| at          | 5.016       | dmf        | 200         |
| np          | 65536       | dseq       |             |
| sw          | 6533.3      | dres       | 1.0         |
| fb          | 4000        | homo       | n           |
| bs          | 4           | DEC2       |             |
| tpwr        | 61          | dfrq2      | 0           |
| pw          | 13.5        | dn2        |             |
| d1          | 0.100       | dpwr2      | 1           |
| tof         | 269.9       | dof2       | 0           |
| nt          | 16          | dm2        | n           |
| ct          | 16          | dmm2       | c           |
| alock       | n           | dmf2       | 200         |
| gain        | not used    | dseq2      |             |
| FLAGS       |             | dres2      | 1.0         |
| il          | n           | homo2      | n           |
| in          | n           | DEC3       |             |
| dp          | y           | dfrq3      | 0           |
| hs          | nn          | dn3        |             |
| DISPLAY     |             | dpwr3      | 1           |
| sp          | 481.4       | dof3       | 0           |
| wp          | 4627.2      | dm3        | n           |
| vs          | 263         | dmm3       | c           |
| sc          | 0           | dmf3       | 200         |
| wc          | 250         | dseq3      |             |
| hzmm        | 18.51       | dres3      | 1.0         |
| ls          | 200.00      | homo3      | n           |
| rfl         | 497.3       | PROCESSING |             |
| rpf         | 0           | wtfile     |             |
| th          | 7           | proc       | ft          |
| ins         | 1.000       | fn         | 65536       |
| ai          | ph          | math       | f           |
|             |             | werr       |             |
|             |             | wexp       | process plH |
|             |             | wbs        |             |
|             |             | wnt        | wft         |

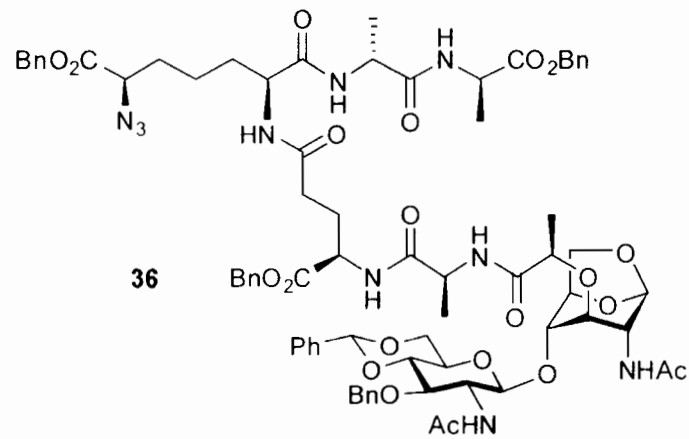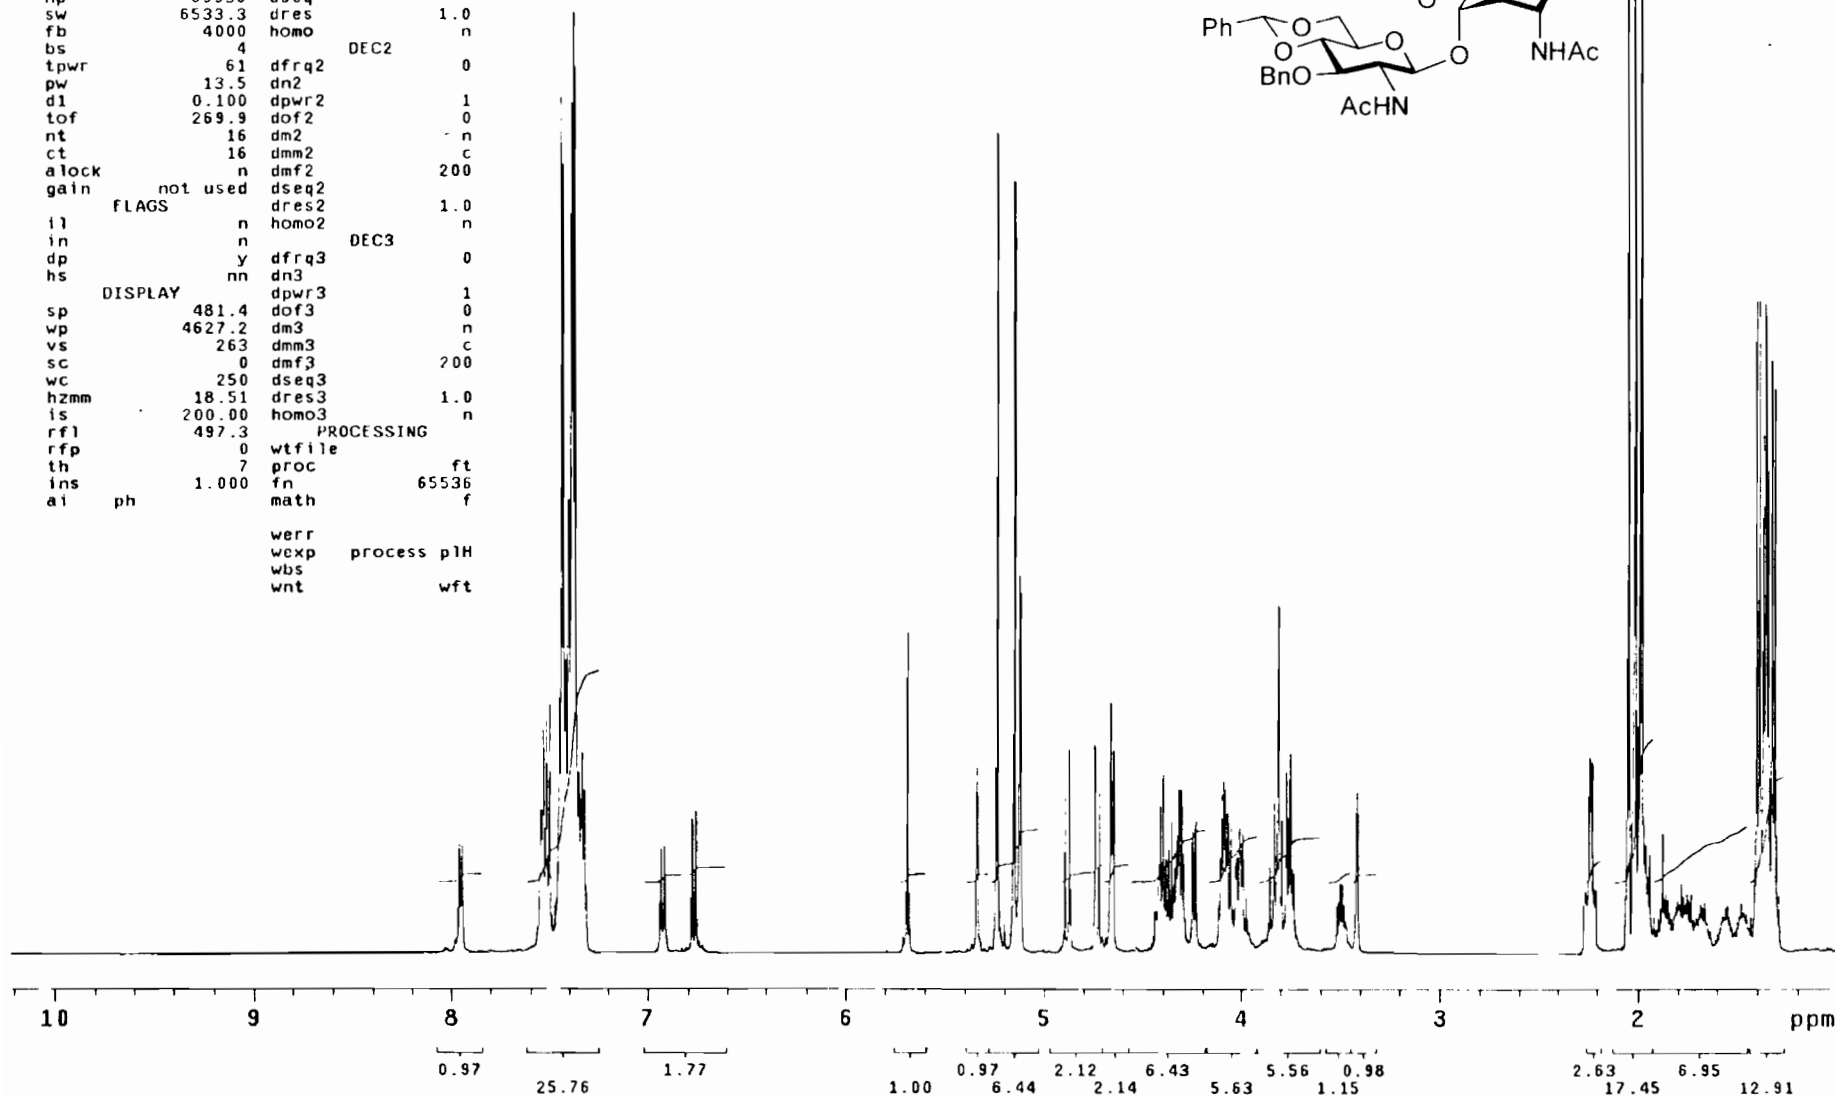

DHL-88

Pulse Sequence: relayh

Solvent: CD3CN

Ambient temperature

INOVA-500 "nmr2a.chem.nd.edu"

Relax. delay 1.300 sec

COSY 90-90

Acq. time 0.141 sec

Width 3640.0 Hz

2D Width 3640.0 Hz

8 repetitions

512 increments

OBSERVE H1, 499.8638062 MHz

DATA PROCESSING

Sine bell 0.070 sec

F1 DATA PROCESSING

Sine bell 0.035 sec

FT size 1024 x 1024

Total time 1 hr, 44 min, 2 sec

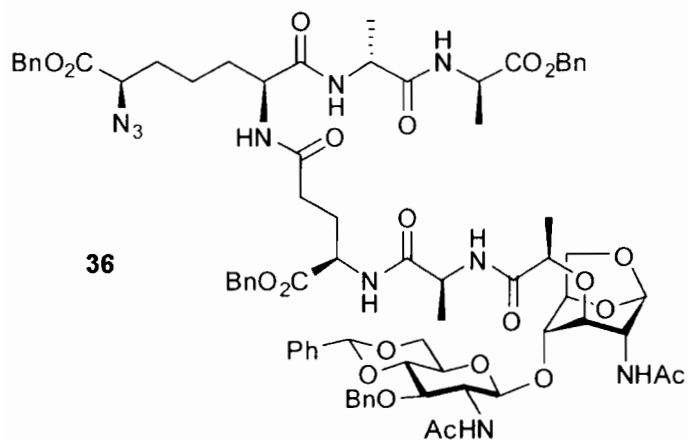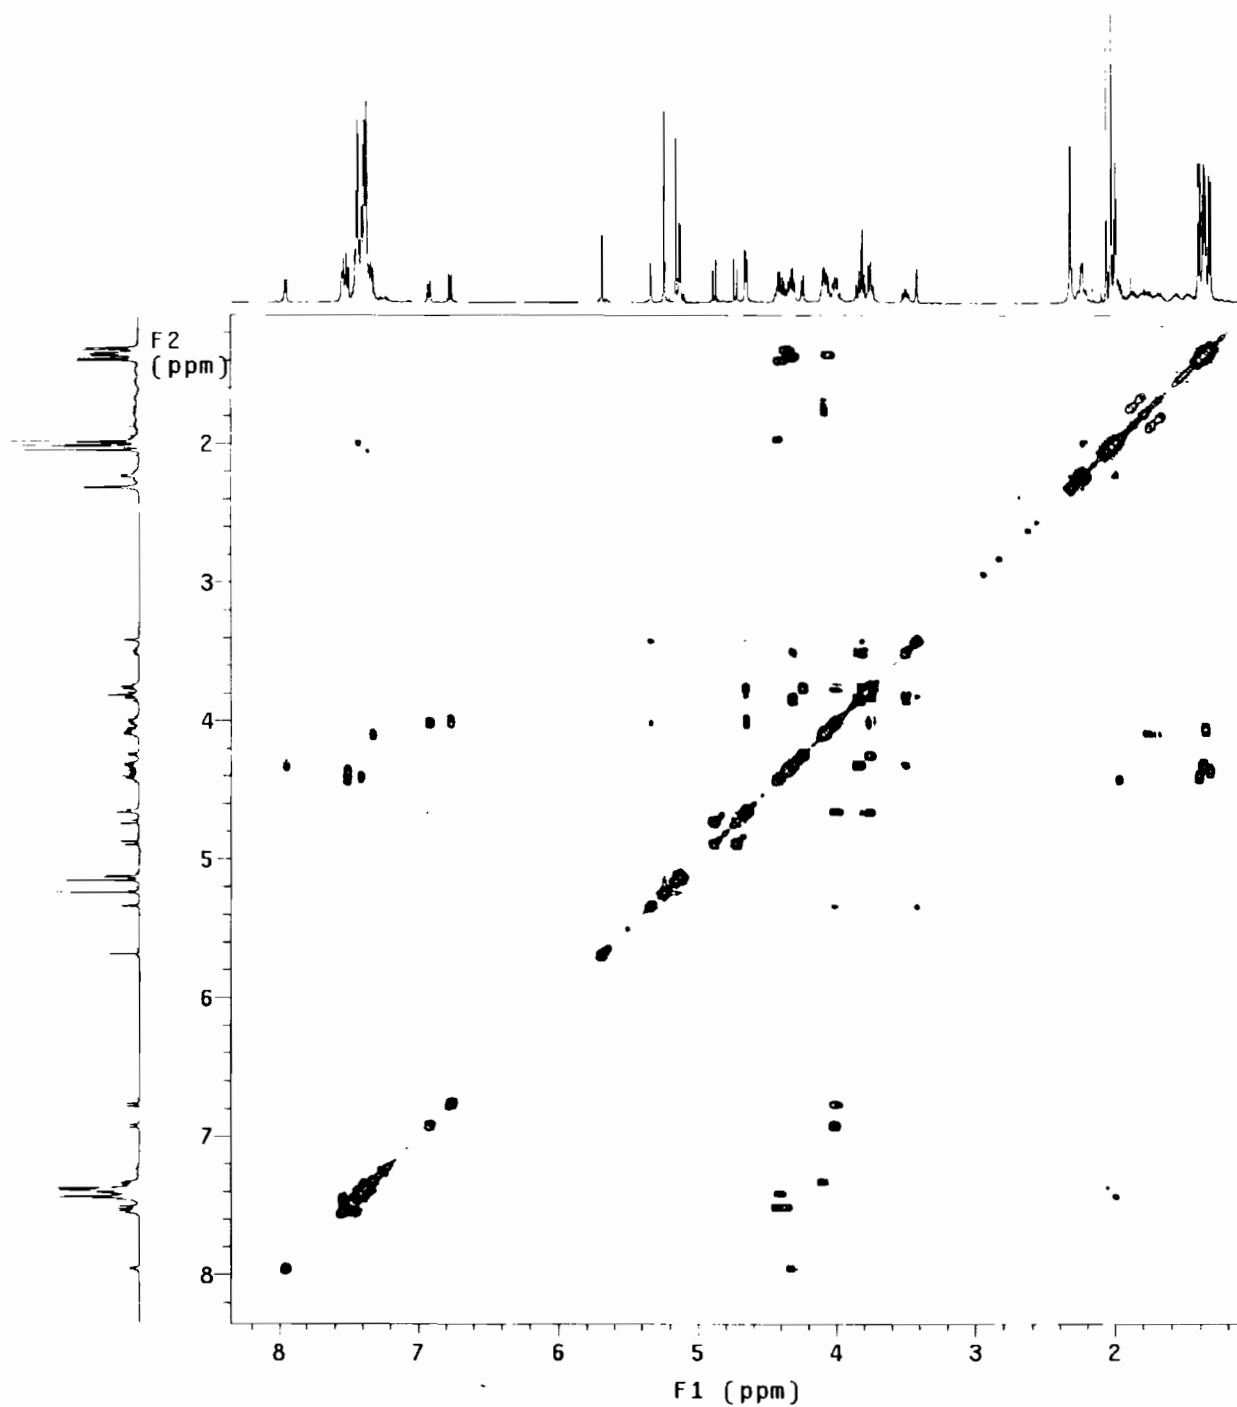

DHL-88

Pulse Sequence: relayh

Solvent: CD<sub>3</sub>CN

Ambient temperature

INOVA-500 "nmr2a.chem.nd.edu"

Relax. delay 1.300 sec

COSY 90-90

Acq. time 0.141 sec

Width 3640.0 Hz

2D Width 3640.0 Hz

8 repetitions

512 increments

OBSERVE H1, 499.8638062 MHz

DATA PROCESSING

Sine bell 0.070 sec

F1 DATA PROCESSING

Sine bell 0.035 sec

FT size 1024 x 1024

Total time 1 hr, 44 min, 2 sec

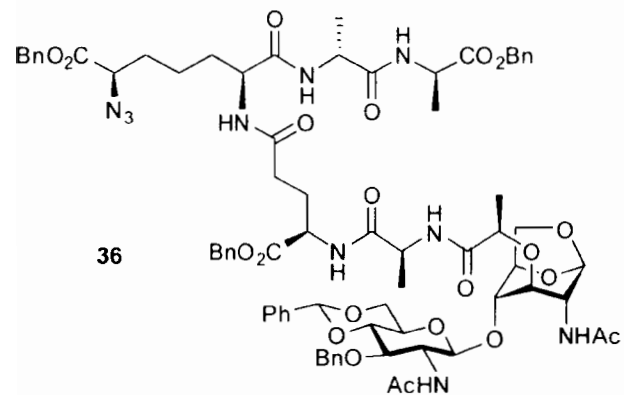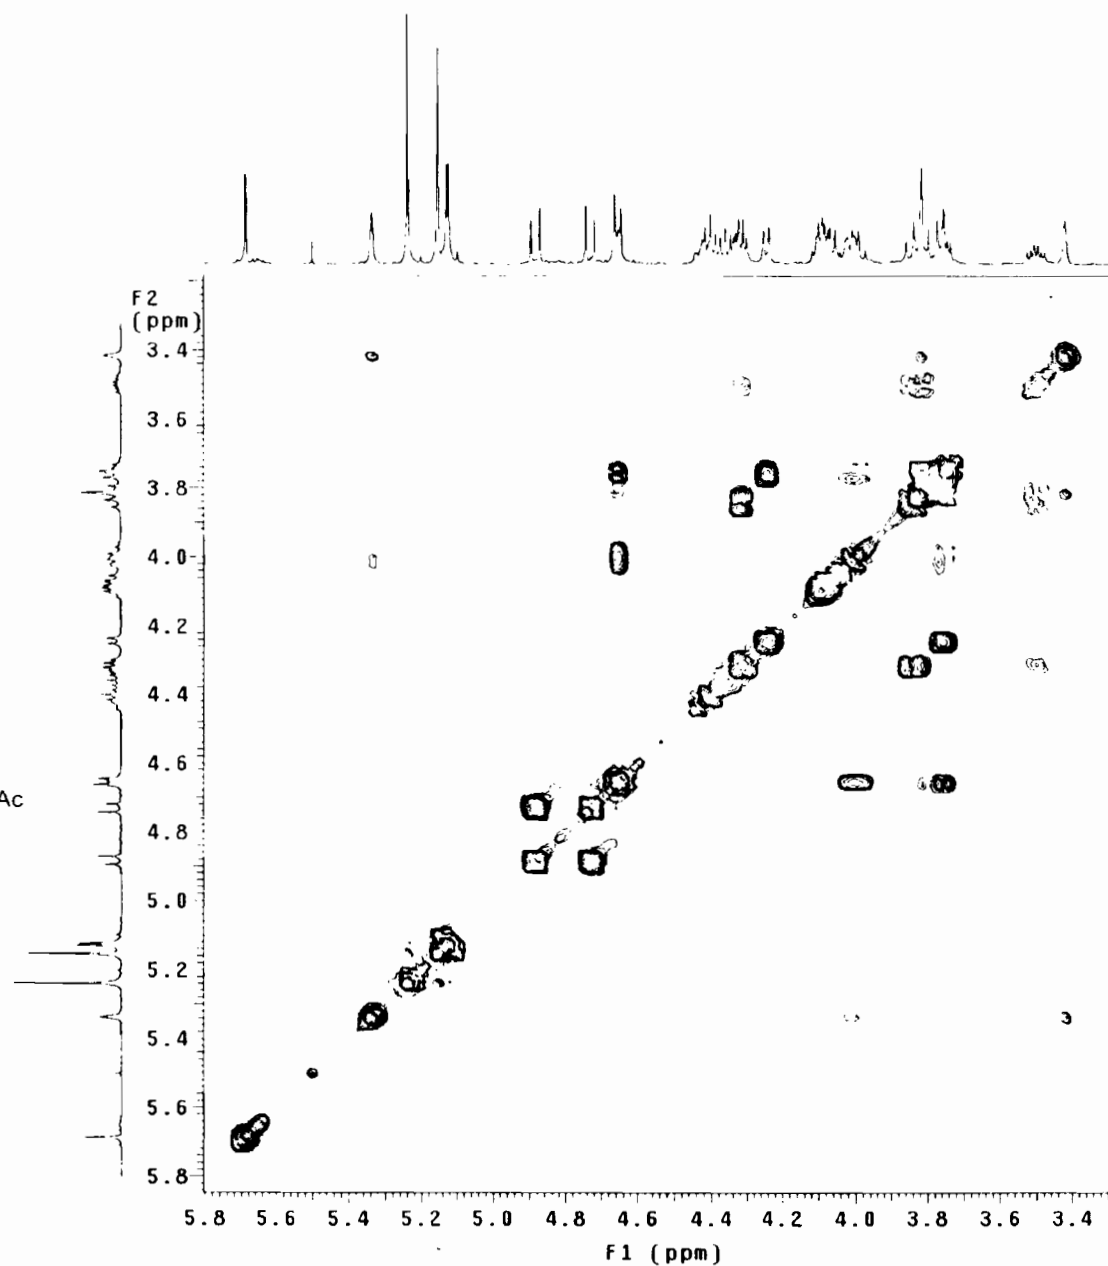

DHL-88

exp7 s2pu1

| SAMPLE      |             | DEC. & VT  |         |
|-------------|-------------|------------|---------|
| date        | Jul 17 2008 | dfrq       | 499.866 |
| solvent     | cd3cn       | dn         | H1      |
| file        | exp         | dpwr       | 40      |
| ACQUISITION |             | dof        | 0       |
| sfrq        | 125.703     | dm         | yyy     |
| tn          | C13         | dmm        | w       |
| at          | 1.215       | dmf        | 8787.35 |
| np          | 65536       | dseq       |         |
| sw          | 26963.3     | dres       | 1.0     |
| fb          | 15000       | homo       | n       |
| bs          | 64          | DEC2       |         |
| tpwr        | 52          | dfrq2      | 0       |
| pw          | 10.2        | dn2        |         |
| dl          | 1.800       | dpwr2      | 1       |
| tof         | 144.5       | dof2       | 0       |
| nl          | 6000        | dm2        | n       |
| ct          | 4636        | dmm2       | c       |
| alock       | n           | dmf2       | 10000   |
| gain        | not used    | dseq2      |         |
| FLAGS       |             | dres2      | 1.0     |
| il          | n           | homo2      | n       |
| in          | n           | DEC3       |         |
| dp          | y           | dfrq3      | 0       |
| hs          | nn          | dn3        |         |
| DISPLAY     |             | dpwr3      | 1       |
| sp          | 1534.9      | dof3       | 0       |
| wp          | 21081.1     | dm3        | n       |
| vs          | 359         | dmm3       | c       |
| sc          | 0           | dmf3       | 10000   |
| wc          | 250         | dseq3      |         |
| hzmm        | 84.32       | dres3      | 1.0     |
| ls          | 500.00      | homo3      | n       |
| rfl         | 1299.8      | PROCESSING |         |
| rfp         | 0           | lb         | 1.00    |
| th          | 4           | wtfile     |         |
| ins         | 100.000     | proc       | ft      |
| ai ,cdc ph  |             | fn         | 131072  |
|             |             | math       | f       |
|             |             | werr       |         |
|             |             | wexp       |         |
|             |             | wbs        |         |
|             |             | wnt        |         |

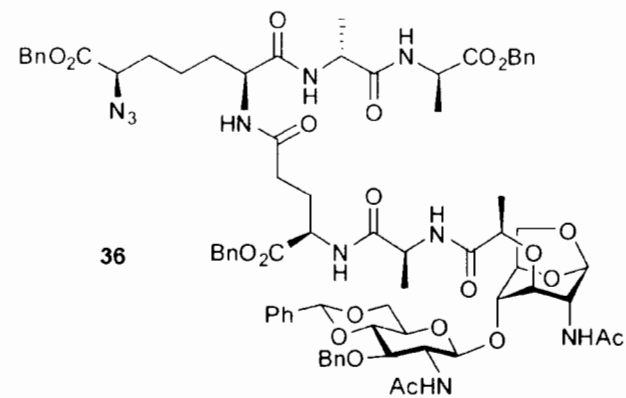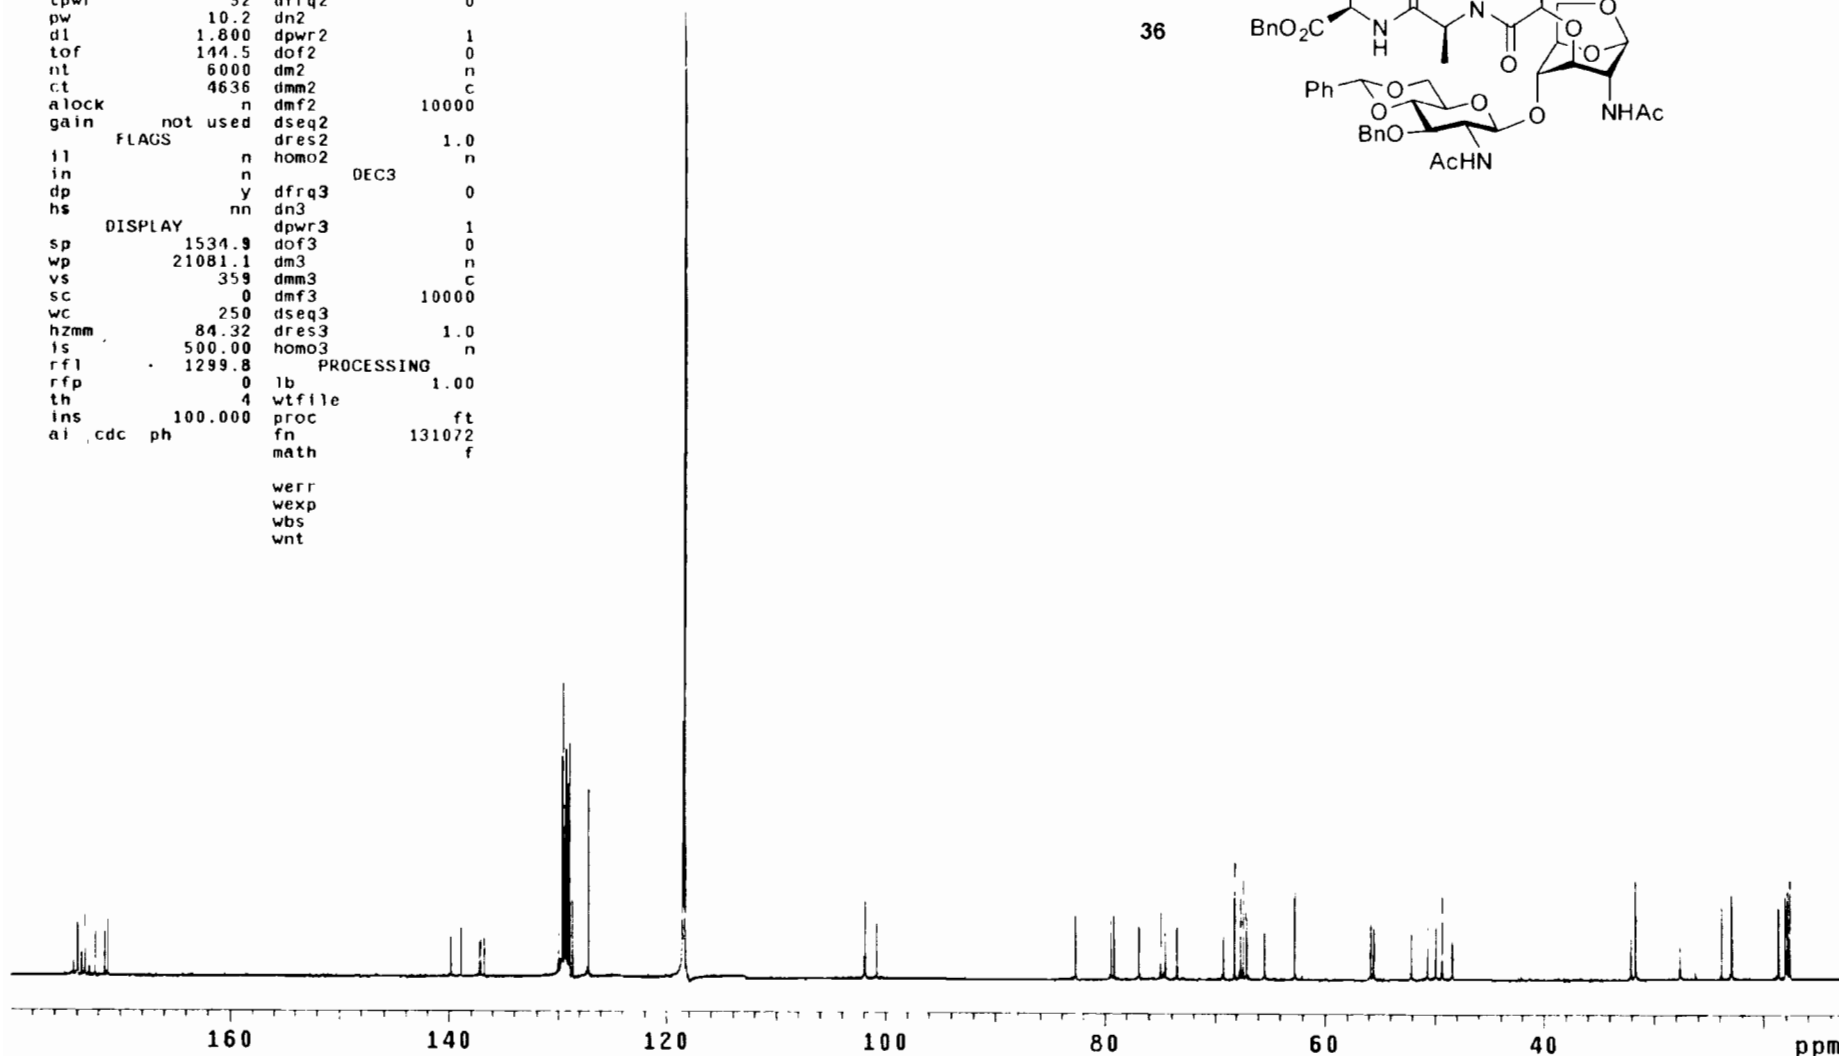

Pulse Sequence: dept

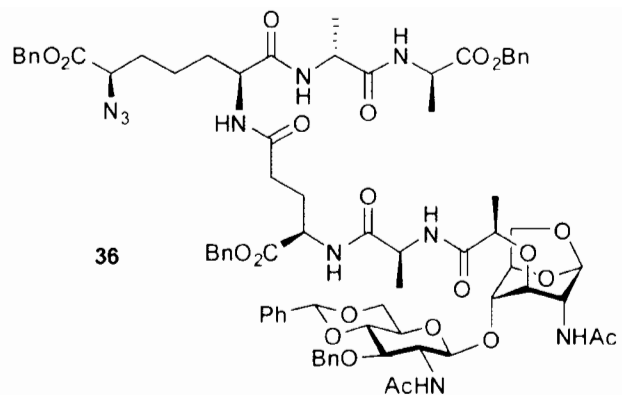

CH3 carbons

CH<sub>2</sub> carbons

CH carbons

all protonated carbons

- S152 -

DHL-88

Pulse Sequence: hetcor

Solvent: cd3cn

Ambient temperature

User: 1-14-87

INOVA-500 "nmr2a.chem.nd.edu"

Relax. delay 1.500 sec

Acq. time 0.111 sec

Width 18403.5 Hz

2D Width 3811.5 Hz

32 repetitions

512 increments

OBSERVE C13, 125.6907289 MHz

DECOUPLE H1, 499.8661163 MHz

Power 40 dB

on during acquisition

off during delay

WALTZ-16 modulated

DATA PROCESSING

Line broadening 1.0 Hz

F1 DATA PROCESSING

Line broadening 0.3 Hz

FT size 4096 x 1024

Total time 7 hr, 45 min, 3 sec

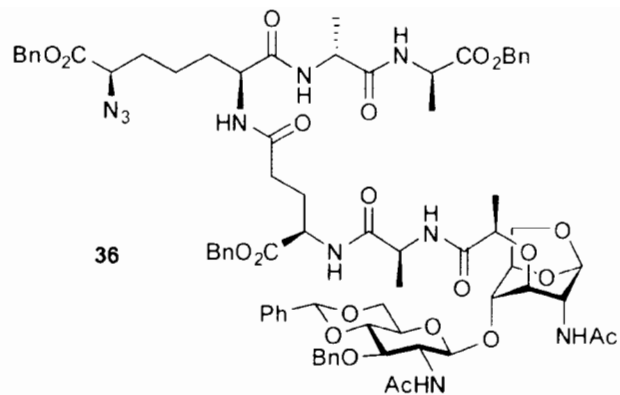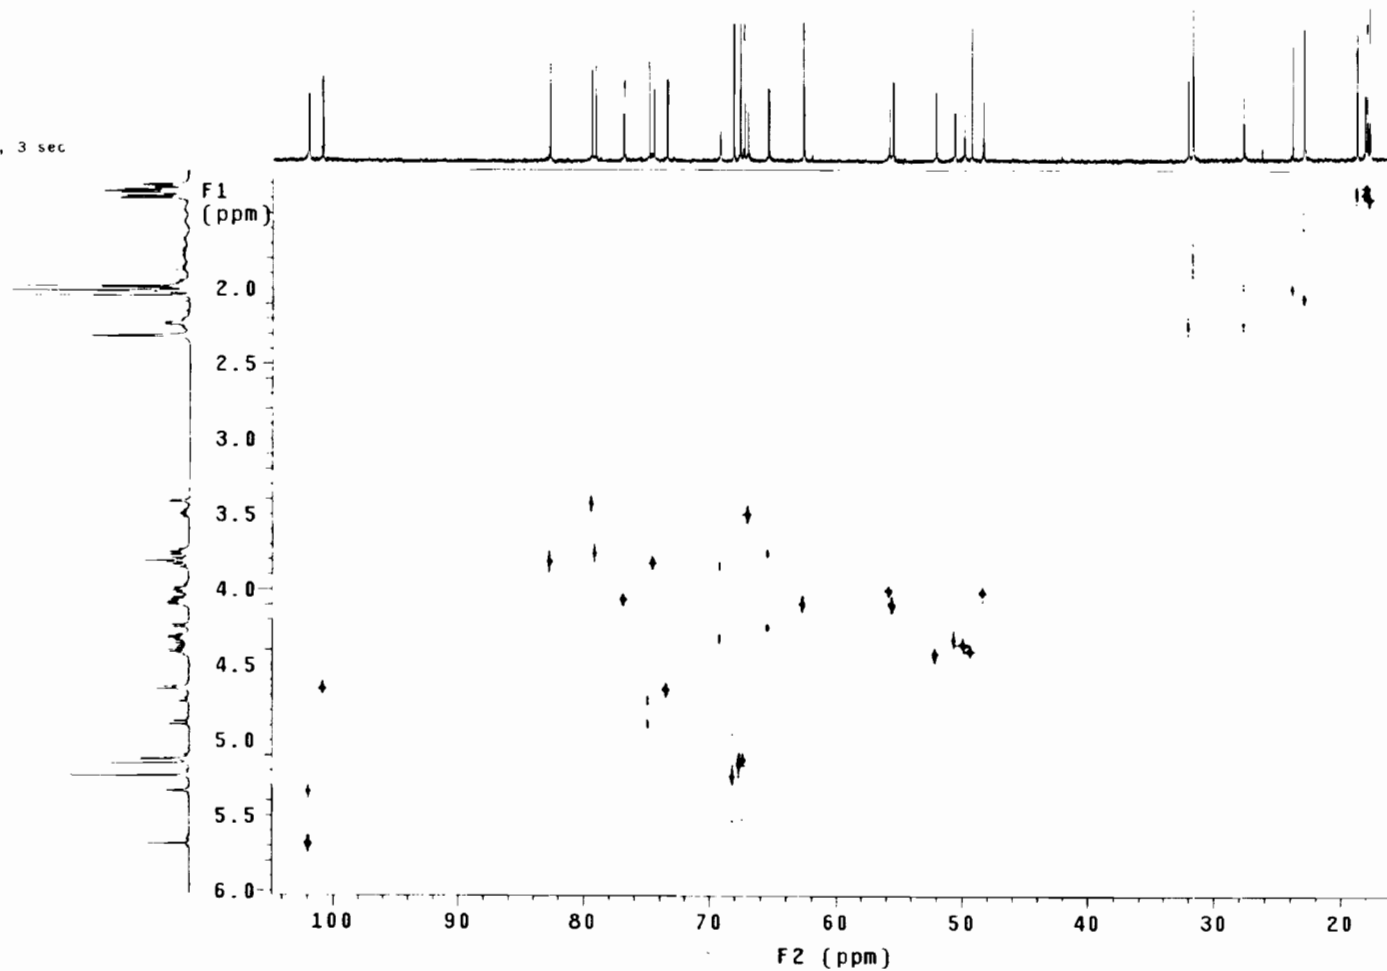

DHL-88

Pulse Sequence: hetcor

Solvent: cd3cn

Ambient temperature

User: 1-14-87

INOVA-500 "nmr2a.chem.nd.edu"

Relax. delay 1.500 sec

Acq. time 0.111 sec

Width 18403.5 Hz

2D Width 3811.5 Hz

32 repetitions

512 increments

OBSERVE C13, 125.6907289 MHz

DECOUPLE H1, 499.8661163 MHz

Power 40 dB

on during acquisition

off during delay

WALTZ-16 modulated

DATA PROCESSING

Line broadening 1.0 Hz

F1 DATA PROCESSING

Line broadening 0.3 Hz

F1 size 4096 x 1024

Total time 7 hr, 45 min, 3 sec

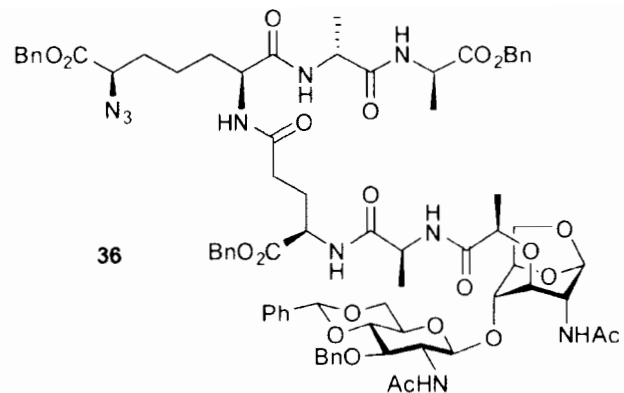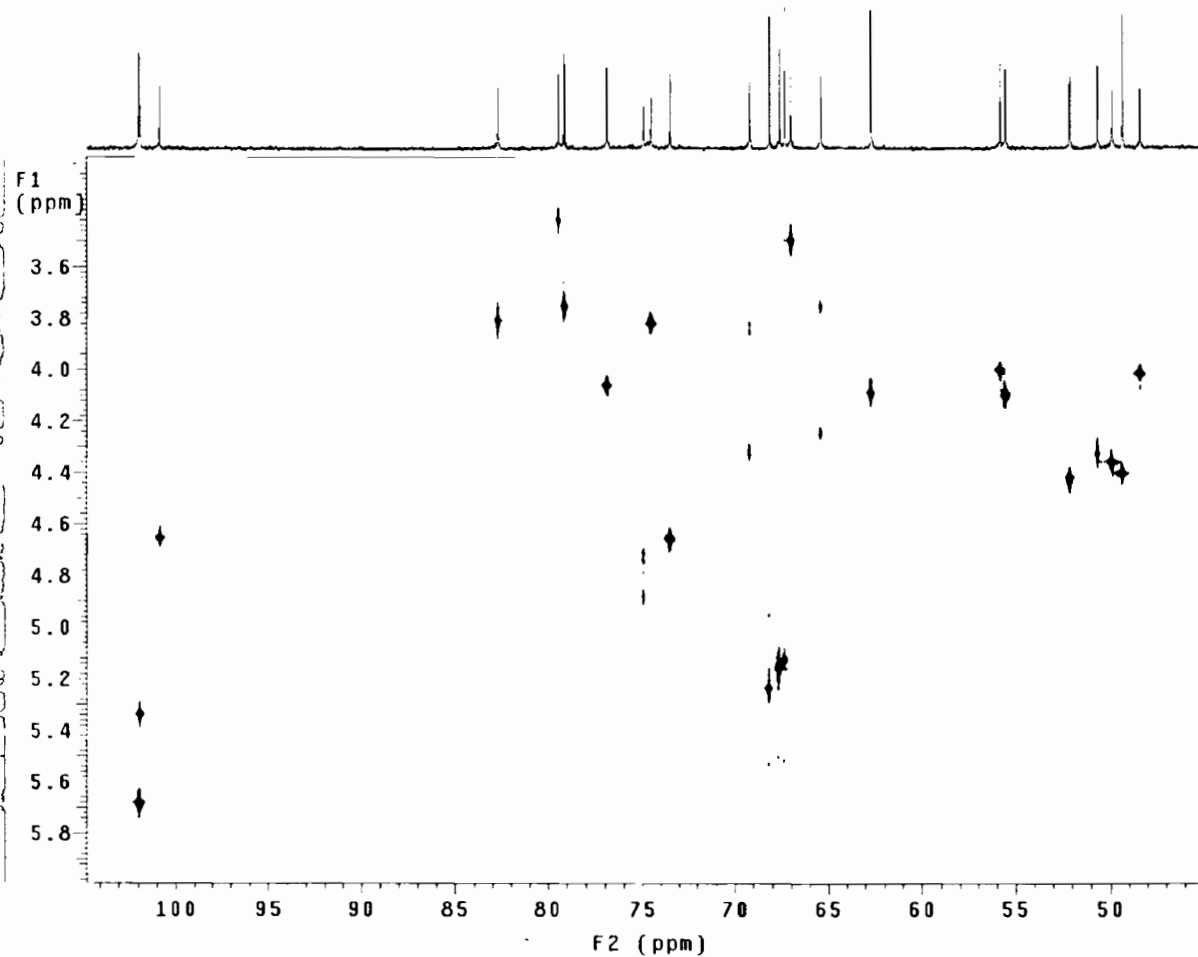

DHL-89

exp3 Proton

| SAMPLE              |                | SPECIAL    |          |
|---------------------|----------------|------------|----------|
| date                | Oct 17 2008    | temp       | 22.0     |
| solvent             | d2o            | gain       | not used |
| file                | /afs/nd.edu/u~ | spin       | not used |
| ser26/dhesek/Priva~ |                | hst        | 0.008    |
| te/DHL/DHL-89H.fid  |                | pw90       | 10.100   |
| ACQUISITION         |                | alfa       | 10.000   |
| sw                  | 4807.7         | FLAGS      |          |
| at                  | 3.408          | il         | n        |
| np                  | 32768          | in         | n        |
| fb                  | 4000           | dp         | y        |
| bs                  | 4              | hs         | nn       |
| d1                  | 0.600          | PROCESSING |          |
| nt                  | 32             | fn         | 65536    |
| ct                  | 32             | DISPLAY    |          |
| TRANSMITTER         |                | sp         | 649.8    |
| tn                  | H1             | wp         | 3635.8   |
| sfrq                | 599.877        | rfl        | 2495.0   |
| tof                 | -299.9         | rfl        | 2885.4   |
| tpwr                | 61             | rp         | 19.9     |
| pw                  | 10.400         | lp         | 3.7      |
| DECOUPLER           |                | PLOT       |          |
| dn                  | C13            | wc         | 250      |
| dof                 | 0              | sc         | 0        |
| dm                  | nnn            | vs         | 1592     |
| dmm                 | c              | th         | 9        |
| dpwr                | 38             | ai         | cdc ph   |
| dmf                 | 35088          |            |          |

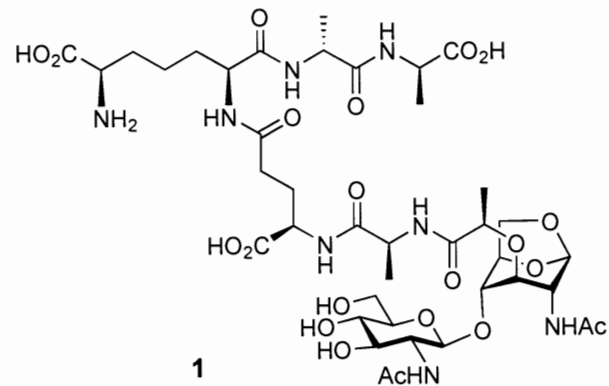

1

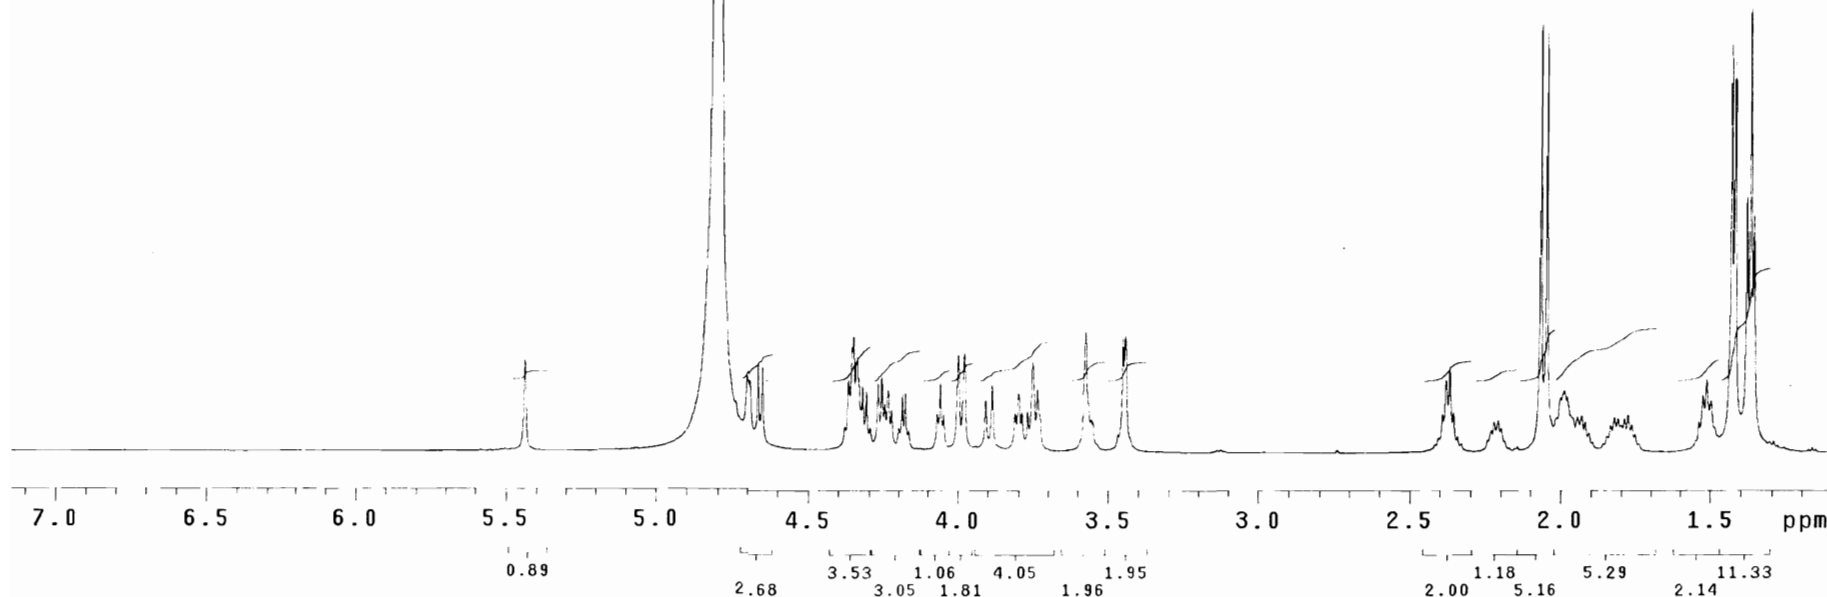

Std proton

File: xp

Pulse Sequence: gCOSY

Solvent: d2o  
Temp. 22.0 C / 295.1 K  
Operator: dhehek  
VNMR5-600 "nmr600"

Relax. delay 1.300 sec  
Acq. time 0.213 sec  
Width 4807.7 Hz  
2D Width 4807.7 Hz  
12 repetitions  
512 increments  
OBSERVE H1, 599.8743040 MHz  
DATA PROCESSING  
Sine bell 0.106 sec  
F1 DATA PROCESSING  
Sine bell 0.191 sec  
FT size 8192 x 8192  
Total time 2 hr, 42 min, 32 sec

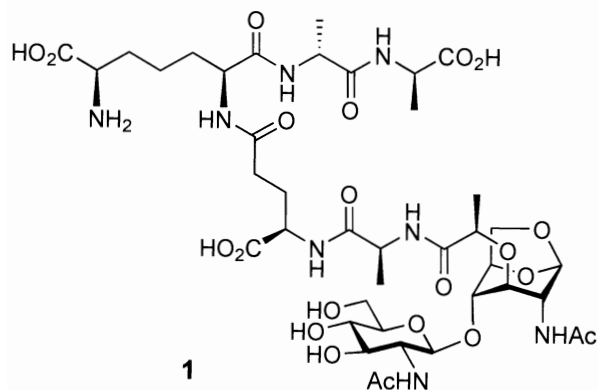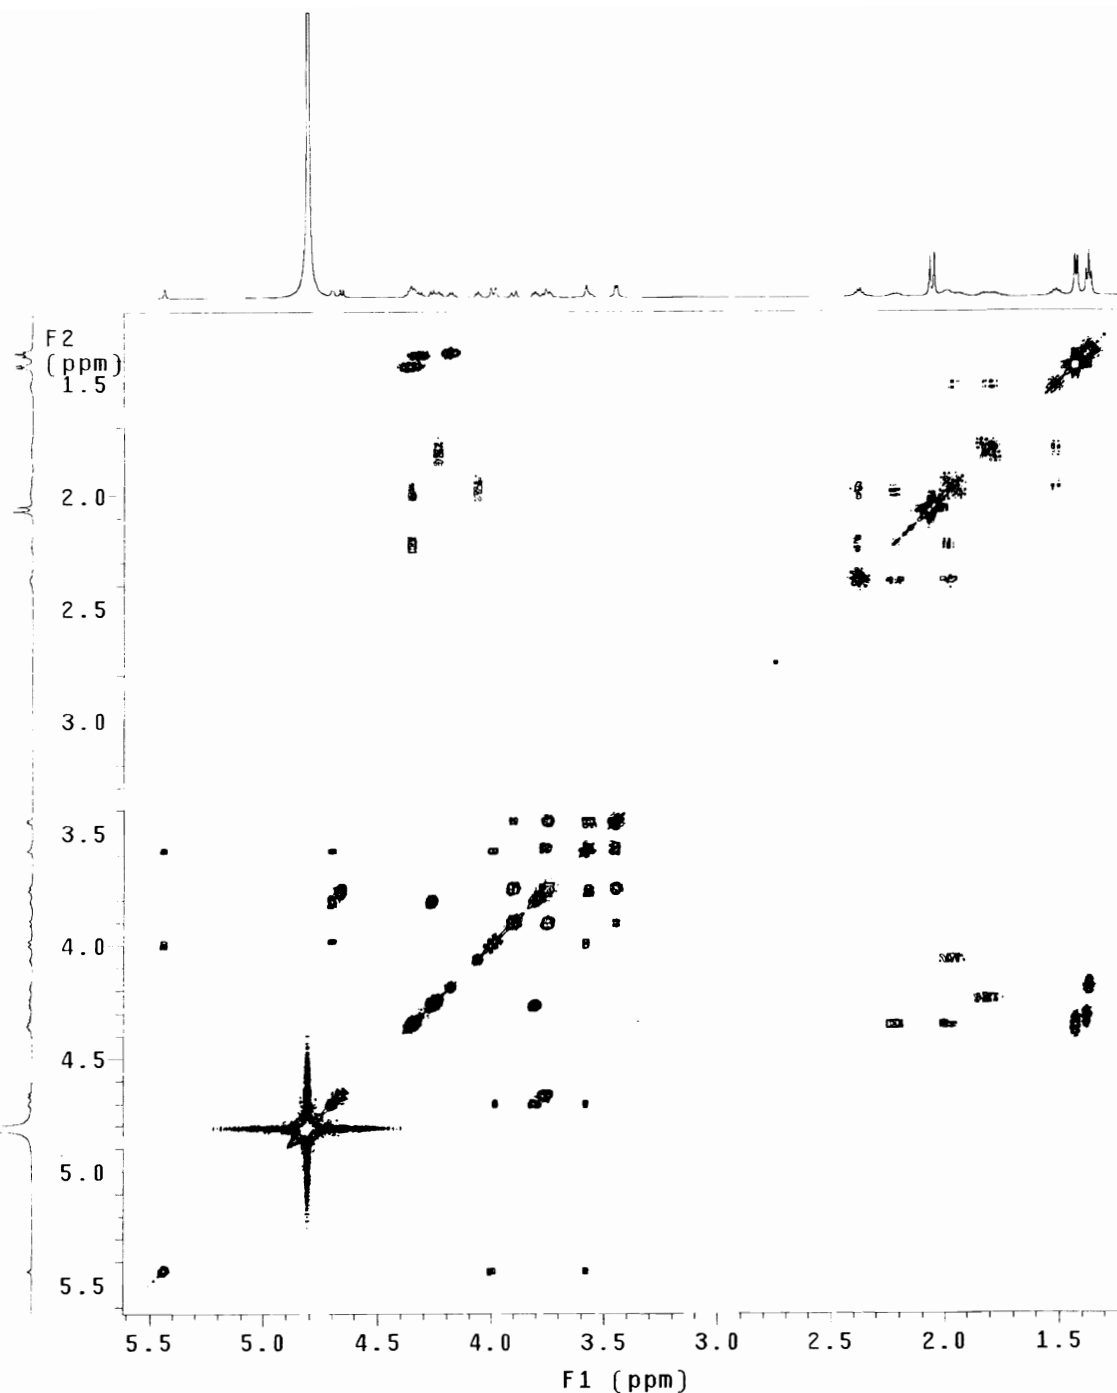

Std proton

File: xp

Pulse Sequence: gCOSY

Solvent: d2o  
Temp. 22.0 C / 295.1 K  
Operator: dhesek  
VNMR-600 "nmr600"

Relax. delay 1.300 sec  
Acq. time 0.213 sec  
Width 4807.7 Hz  
2D Width 4807.7 Hz  
12 repetitions  
512 increments  
OBSERVE H1, 599.8743040 MHz  
DATA PROCESSING  
Sine bell 0.106 sec  
F1 DATA PROCESSING  
Sine bell 0.191 sec  
FT size 8192 x 8192  
Total time 2 hr, 42 min, 32 sec

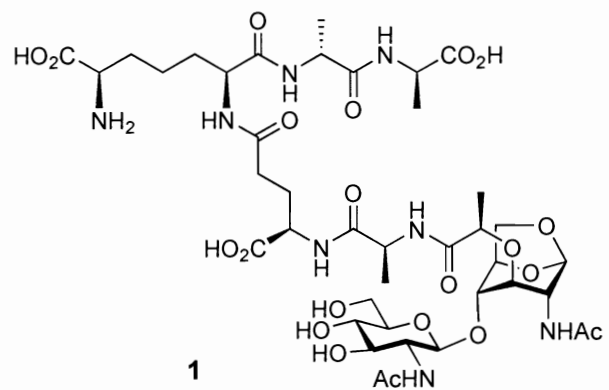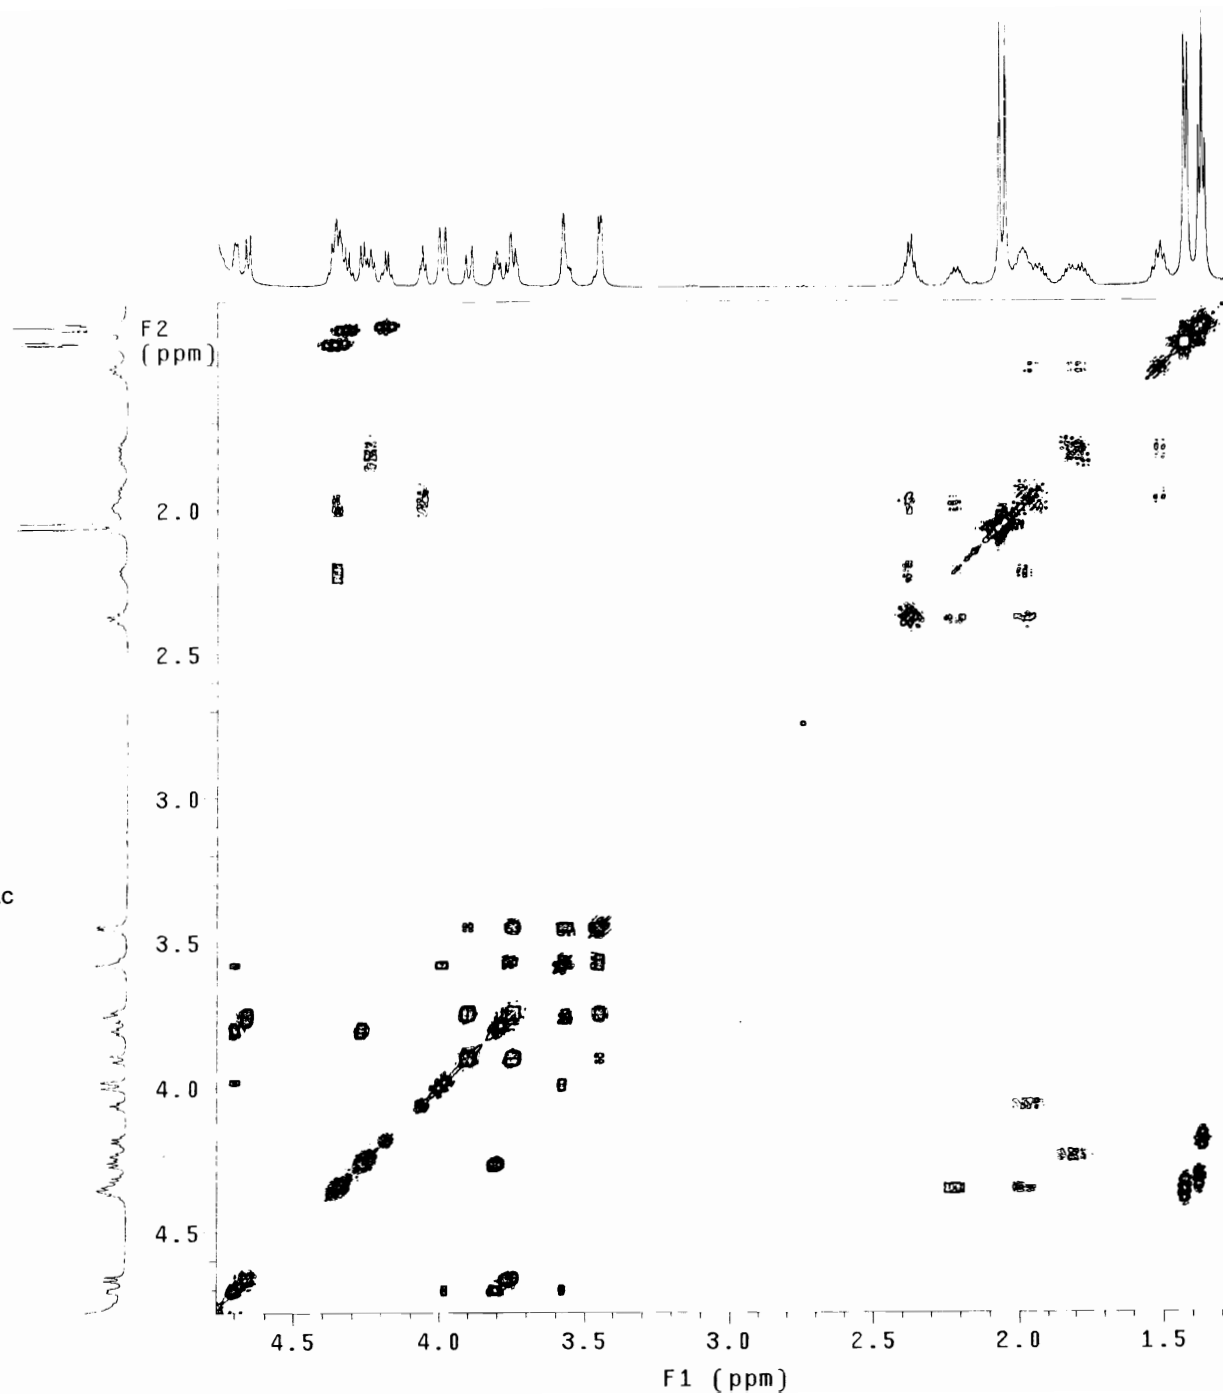



DHL-89

exp4 Carbon

|             |             |            |          |
|-------------|-------------|------------|----------|
| SAMPLE      |             | SPECIAL    |          |
| date        | Oct 17 2008 | temp       | 22.0     |
| solvent     | d2o         | gain       | not used |
| file        | exp         | spin       | not used |
| ACQUISITION |             | hst        | 0.008    |
| sw          | 30487.8     | pw90       | 7.500    |
| at          | 1.783       | alfa       | 10.000   |
| np          | 108694      | FLAGS      |          |
| fb          | 17000       | il         | n        |
| bs          | 4           | in         | n        |
| d1          | 1.220       | dp         | y        |
| nt          | 20000       | hs         | nn       |
| ct          | 20000       | PROCESSING |          |
| TRANSMITTER |             | lb         | 0.50     |
| tn          | C13         | fn         | 262144   |
| sfrq        | 150.852     | DISPLAY    |          |
| tof         | -719.9      | sp         | 1678.3   |
| tpwr        | 58          | wp         | 25524.3  |
| pw          | 7.500       | rfl        | 1668.4   |
| DECOUPLER   |             | rfp        | 0        |
| dn          | H1          | rp         | 135.4    |
| dof         | 0           | lp         | -0       |
| dm          | YYY         | PLOT       |          |
| dmm         | w           | wc         | 250      |
| dpwr        | 44          | sc         | 0        |
| dmf         | 15094       | vs         | 4182     |
|             |             | th         | 5        |
|             |             | ai         | cdc ph   |

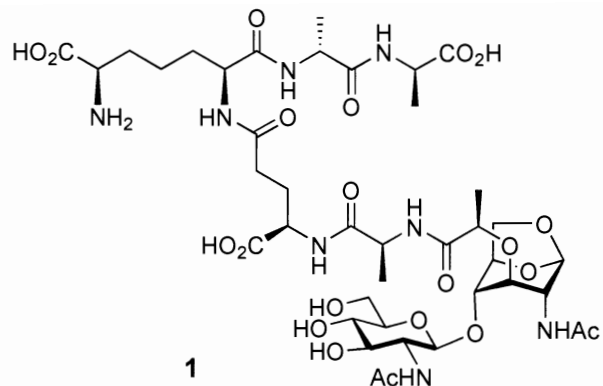

1

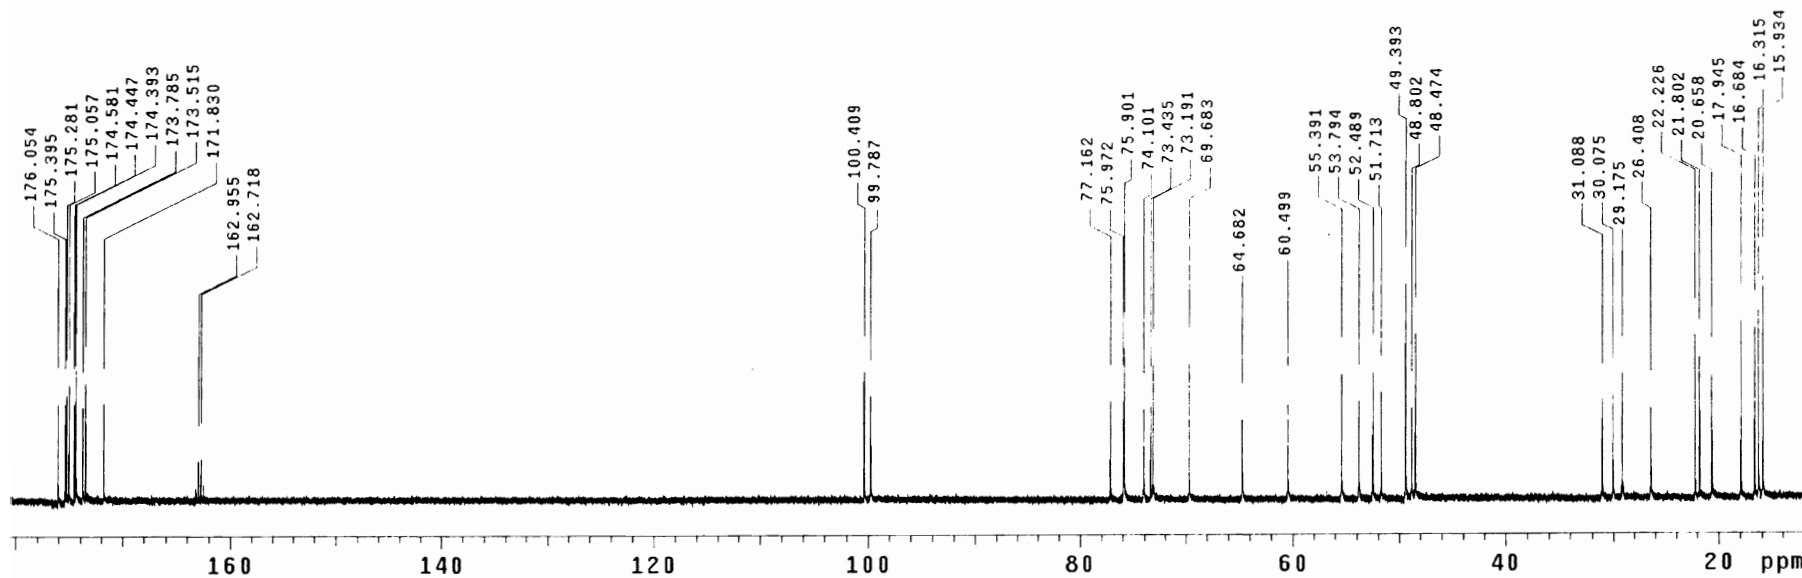

DHL-89

File: xp

Pulse Sequence: DEPT

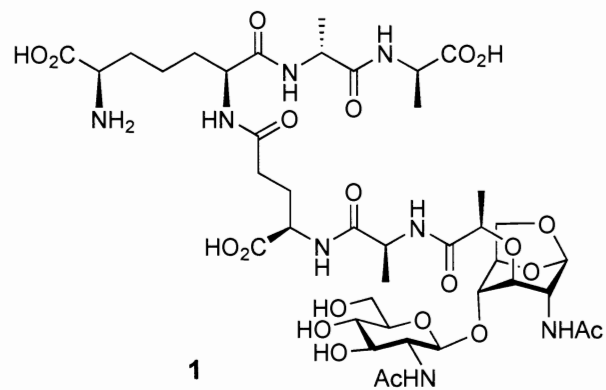

CH3 carbons

CH2 carbons

CH carbons

all protonated carbons

100

90

80

70

60

50

40

30

20

ppm

DHL-89

File: xp

Pulse Sequence: HETCOR

Solvent: d2o

Temp. 22.0 C / 295.1 K

Operator: dhesek

VNMRS-600 "nmr600"

Relax. delay 1.313 sec

Acq. time 0.187 sec

Width 21929.8 Hz

2D Width 4799.0 Hz

36 repetitions

2 x 512 increments

OBSERVE C13, 150.8385376 MHz

DECOUPLE H1, 599.8770986 MHz

Power 44 dB

on during acquisition

off during delay

WALTZ-16 modulated

DATA PROCESSING

Gauss apodization 0.086 sec

F1 DATA PROCESSING

Gauss apodization 0.098 sec

FT size 8192 x 4096

Total time 16 hr, 11 min, 3 sec

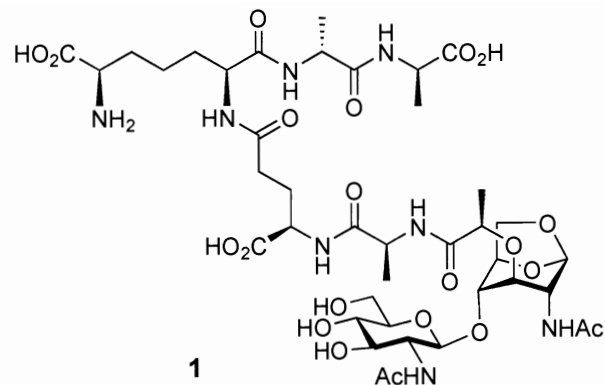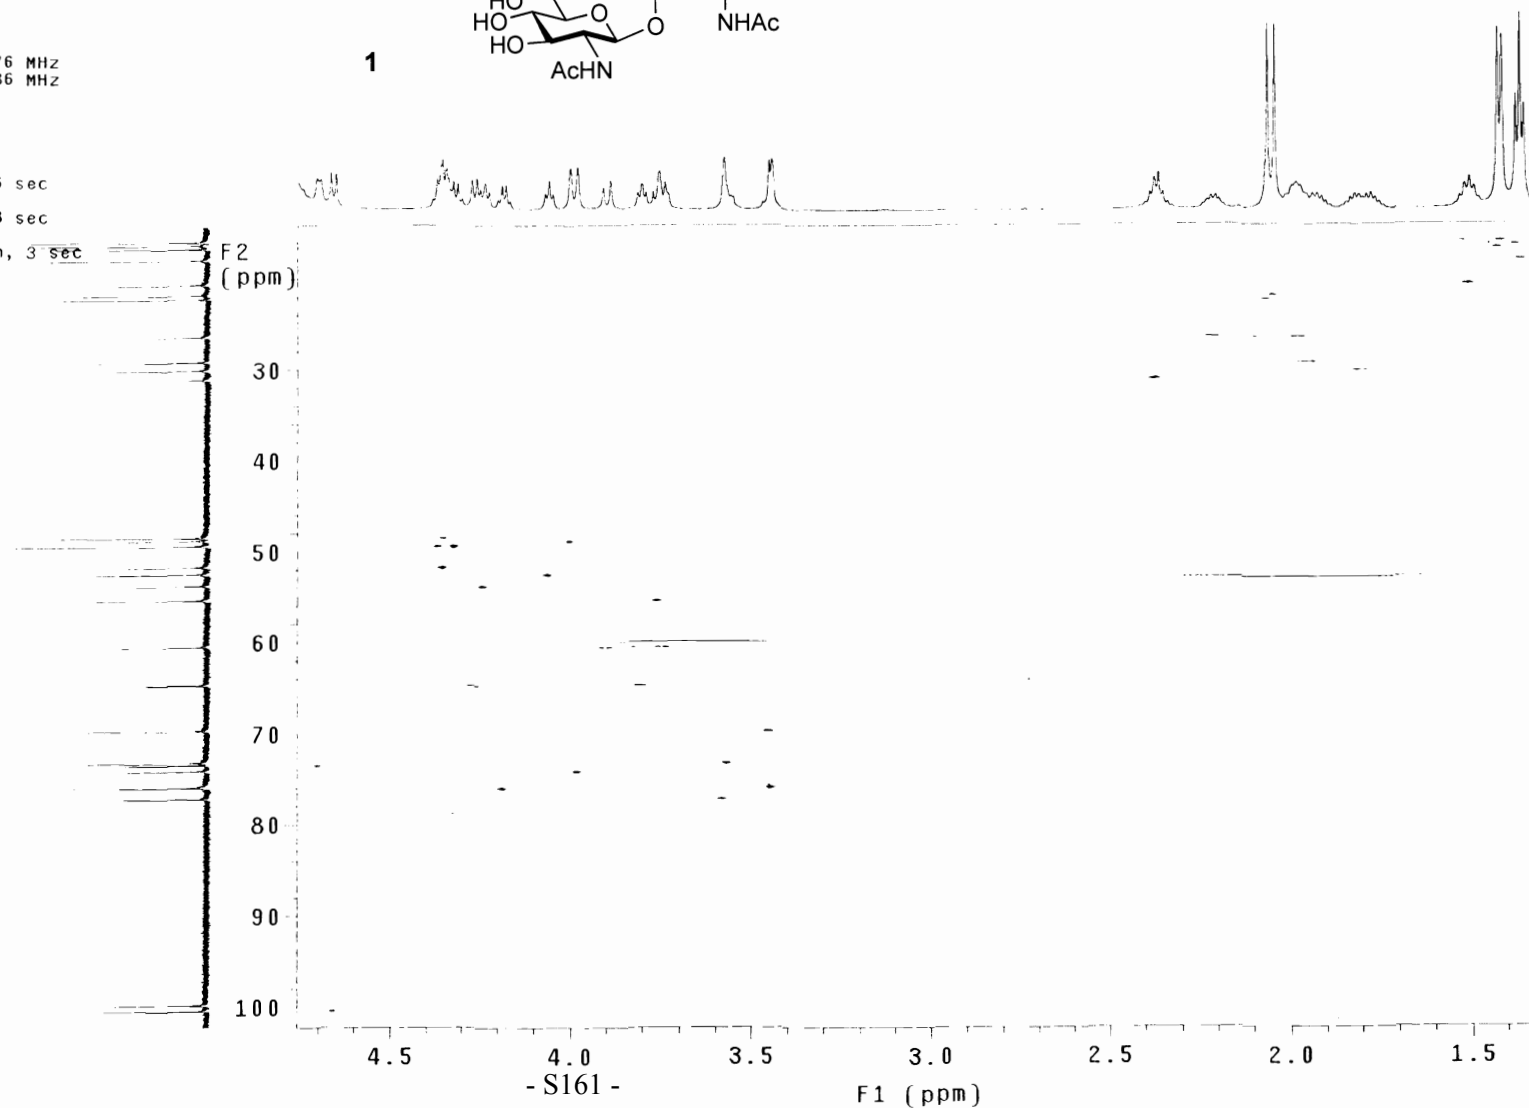

DHL-89

File: xp

Pulse Sequence: HEICOR

Solvent: d2o  
Temp. 22.0 C / 295.1 K  
Operator: dhesek  
VNMR-600 "nmr600"

Relax. delay 1.313 sec  
Acq. time 0.187 sec  
Width 21929.8 Hz  
2D Width 4799.0 Hz  
36 repetitions  
2 x 512 increments  
OBSERVE C13, 150.8385376 MHz  
DECOUPLE H1, 599.8779986 MHz  
Power 44 dB  
on during acquisition  
off during delay  
WALTZ-16 modulated  
DATA PROCESSING  
Gauss apodization 0.086 sec  
F1 DATA PROCESSING  
Gauss apodization 0.098 sec  
FT size 8192 x 4096  
Total time 16 hr, 11 min, 3 sec

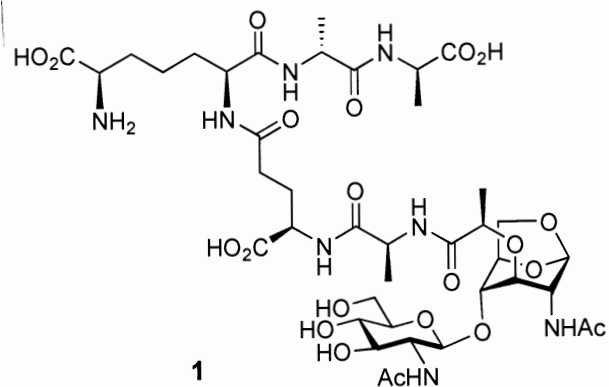

1

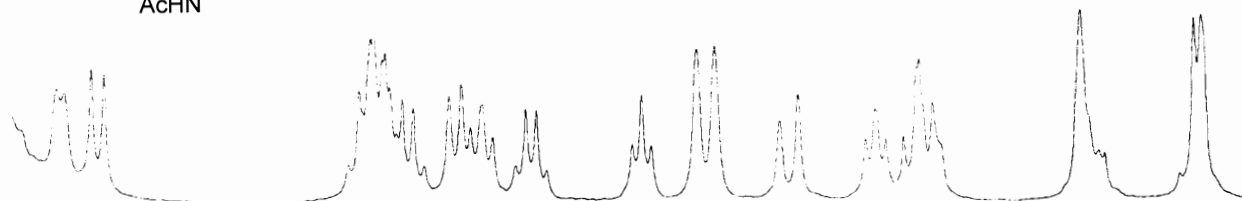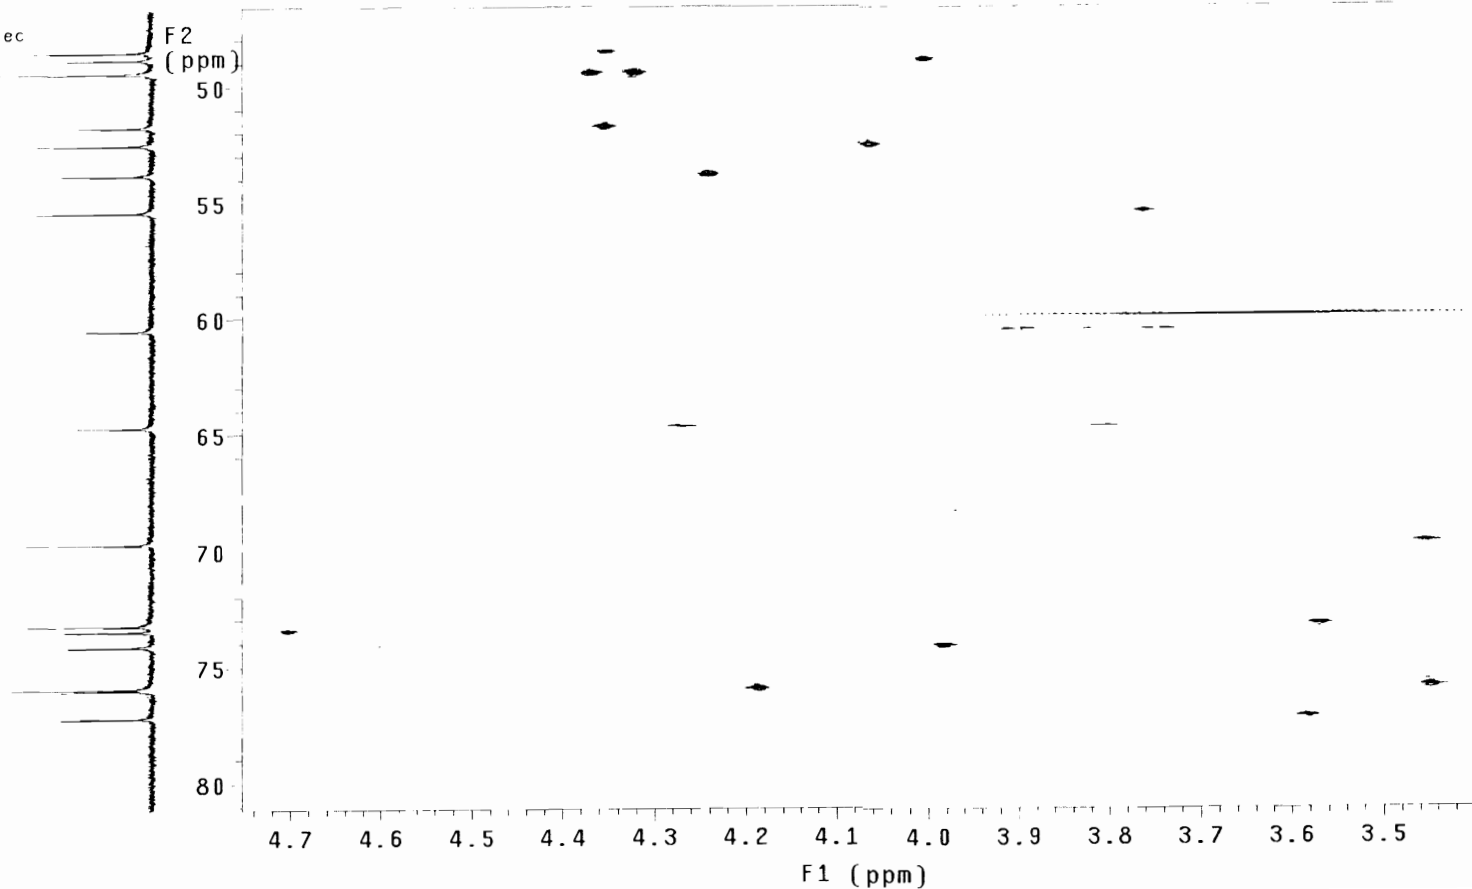

exp1 s2pu1

| SAMPLE      |          |       | DEC. & VT  |         |
|-------------|----------|-------|------------|---------|
| date        | Jun 29   | 2008  | dfrq       | 499.866 |
| solvent     |          | CD300 | dn         | H1      |
| file        |          | exp   | dpwr       | 30      |
| ACQUISITION |          |       |            |         |
| sfrq        | 499.866  |       | dof        | 0       |
| tn          | H1       |       | dm         | nnn     |
| at          | 5.016    |       | dmm        | c       |
| np          | 65536    |       | dmf        | 200     |
| sw          | 6533.3   |       | dseq       |         |
| fb          | 4000     |       | dres       | 1.0     |
| bs          | 4        |       | homo       | n       |
| tpwr        | 61       |       | DEC2       |         |
| pw          | 13.5     |       | dfrq2      | 0       |
| d1          | 0.100    |       | dn2        | 1       |
| tof         | 269.9    |       | dpwr2      | 0       |
| nt          | 16       |       | dof2       | 1       |
| ct          | 16       |       | dm2        | n       |
| alock       | n        |       | dmm2       | c       |
| gain        | not used |       | dmf2       | 200     |
| FLAGS       |          |       | dseq2      |         |
| il          | n        |       | dres2      | 1.0     |
| in          | n        |       | homo2      | n       |
| dp          | y        |       | DEC3       |         |
| hs          | nn       |       | dfrq3      | 0       |
| DISPLAY     |          |       | dn3        |         |
| sp          | -537.8   |       | dpwr3      | 1       |
| wp          | 6533.1   |       | dof3       | 0       |
| vs          | 252      |       | dm3        | n       |
| sc          | 0        |       | dmm3       | c       |
| wc          | 250      |       | dmf3       | 200     |
| hzmm        | 26.13    |       | dseq3      |         |
| is          | 200.00   |       | dres3      | 1.0     |
| rfl         | 2972.4   |       | homo3      | n       |
| rff         | 2434.3   |       | PROCESSING |         |
| th          | 7        |       | wtfile     | ft      |
| ins         | 6.000    |       | proc       | 65536   |
| al          | ph       |       | fn         |         |
|             |          |       | math       | f       |

```
werr
wexp    process plH
wbs
wnt      wft
```

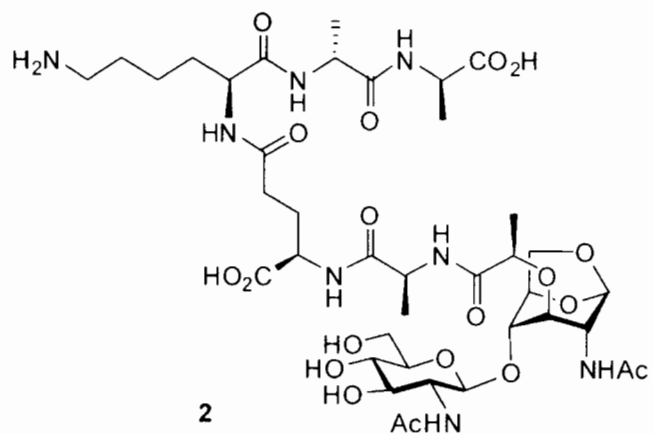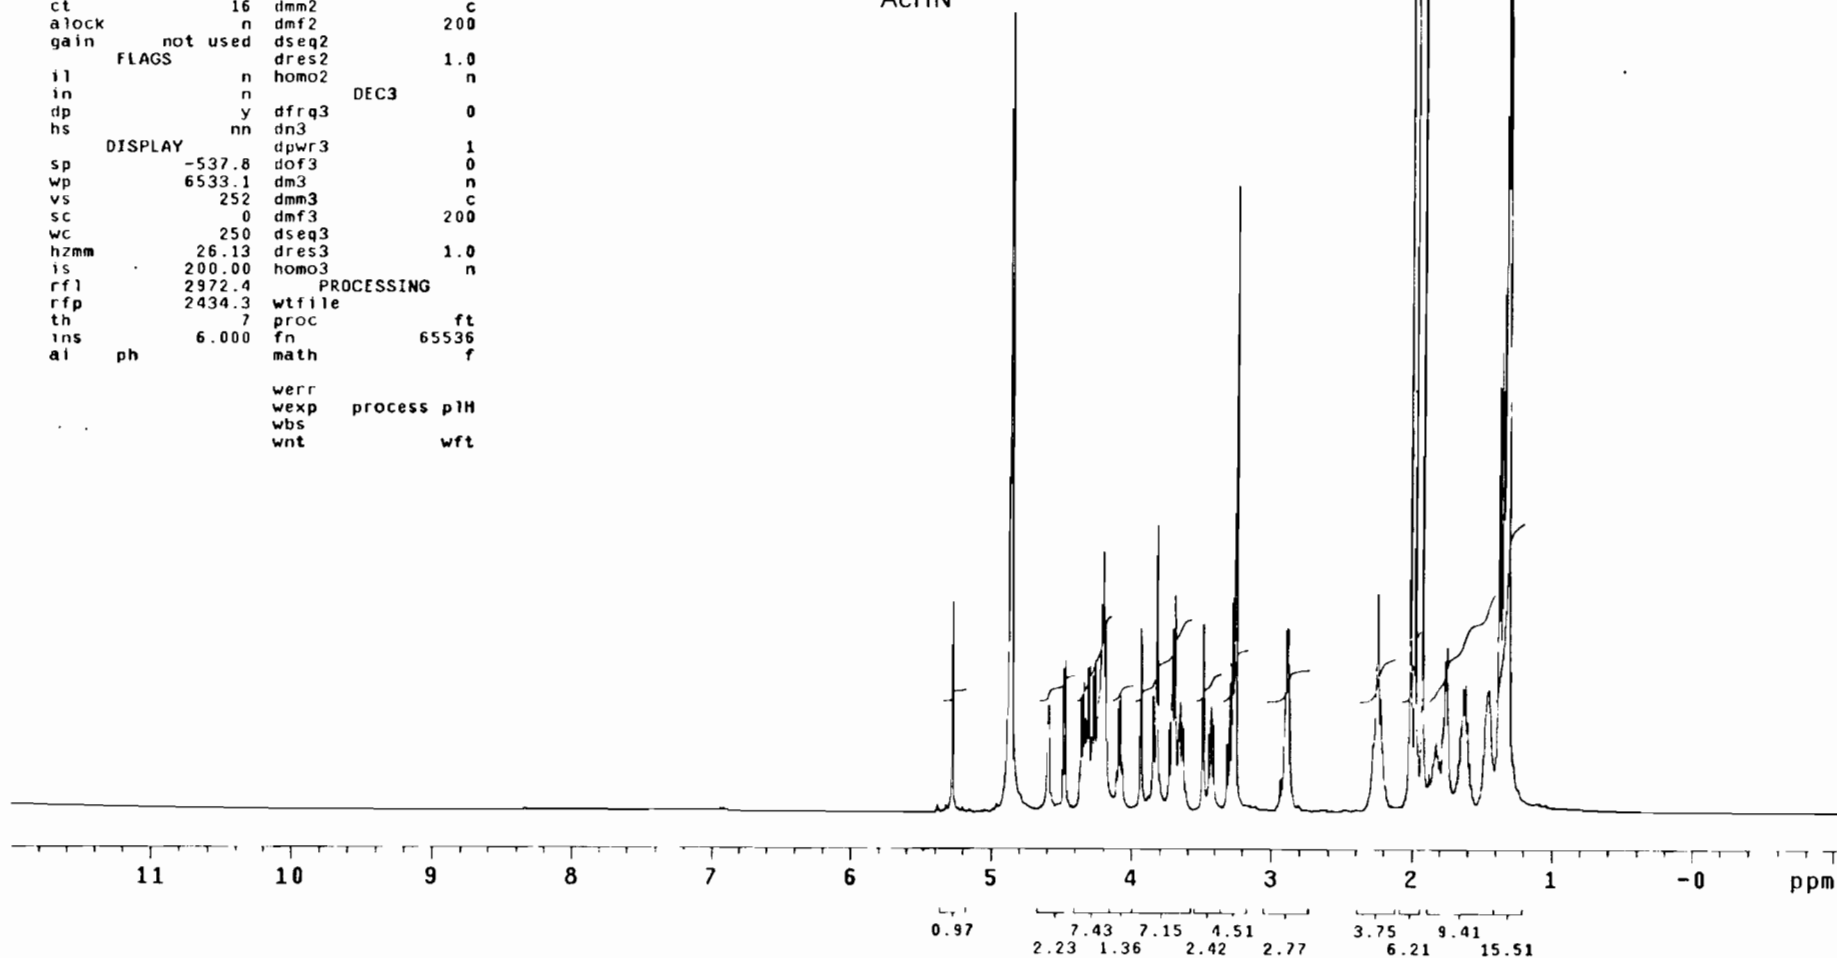

DHL-84

Pulse Sequence: relayh

Solvent: CD3OD

Ambient temperature

INOVA-500 "nmr2a.chem.nd.edu"

Relax. delay 1.300 sec

COSY 90-90

Acq. time 0.220 sec

Width 2326.5 Hz

2D Width 2326.5 Hz

16 repetitions

512 increments

OBSERVE H1, 499.8631721 MHz

DATA PROCESSING

Sine bell 0.110 sec

F1 DATA PROCESSING

Sine bell 0.055 sec

FT size 1024 x 1024

Total time 3 hr, 44 min, 9 sec

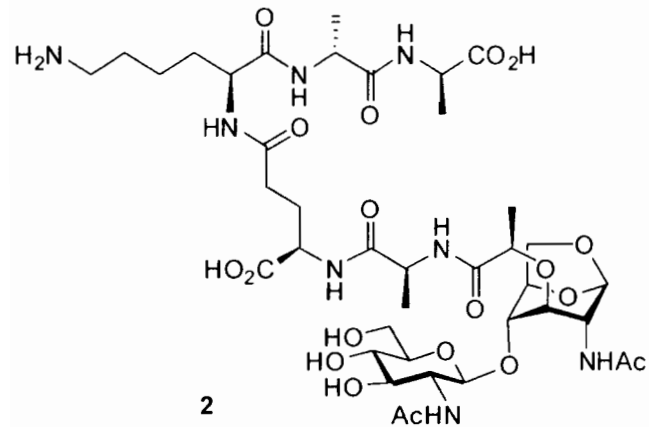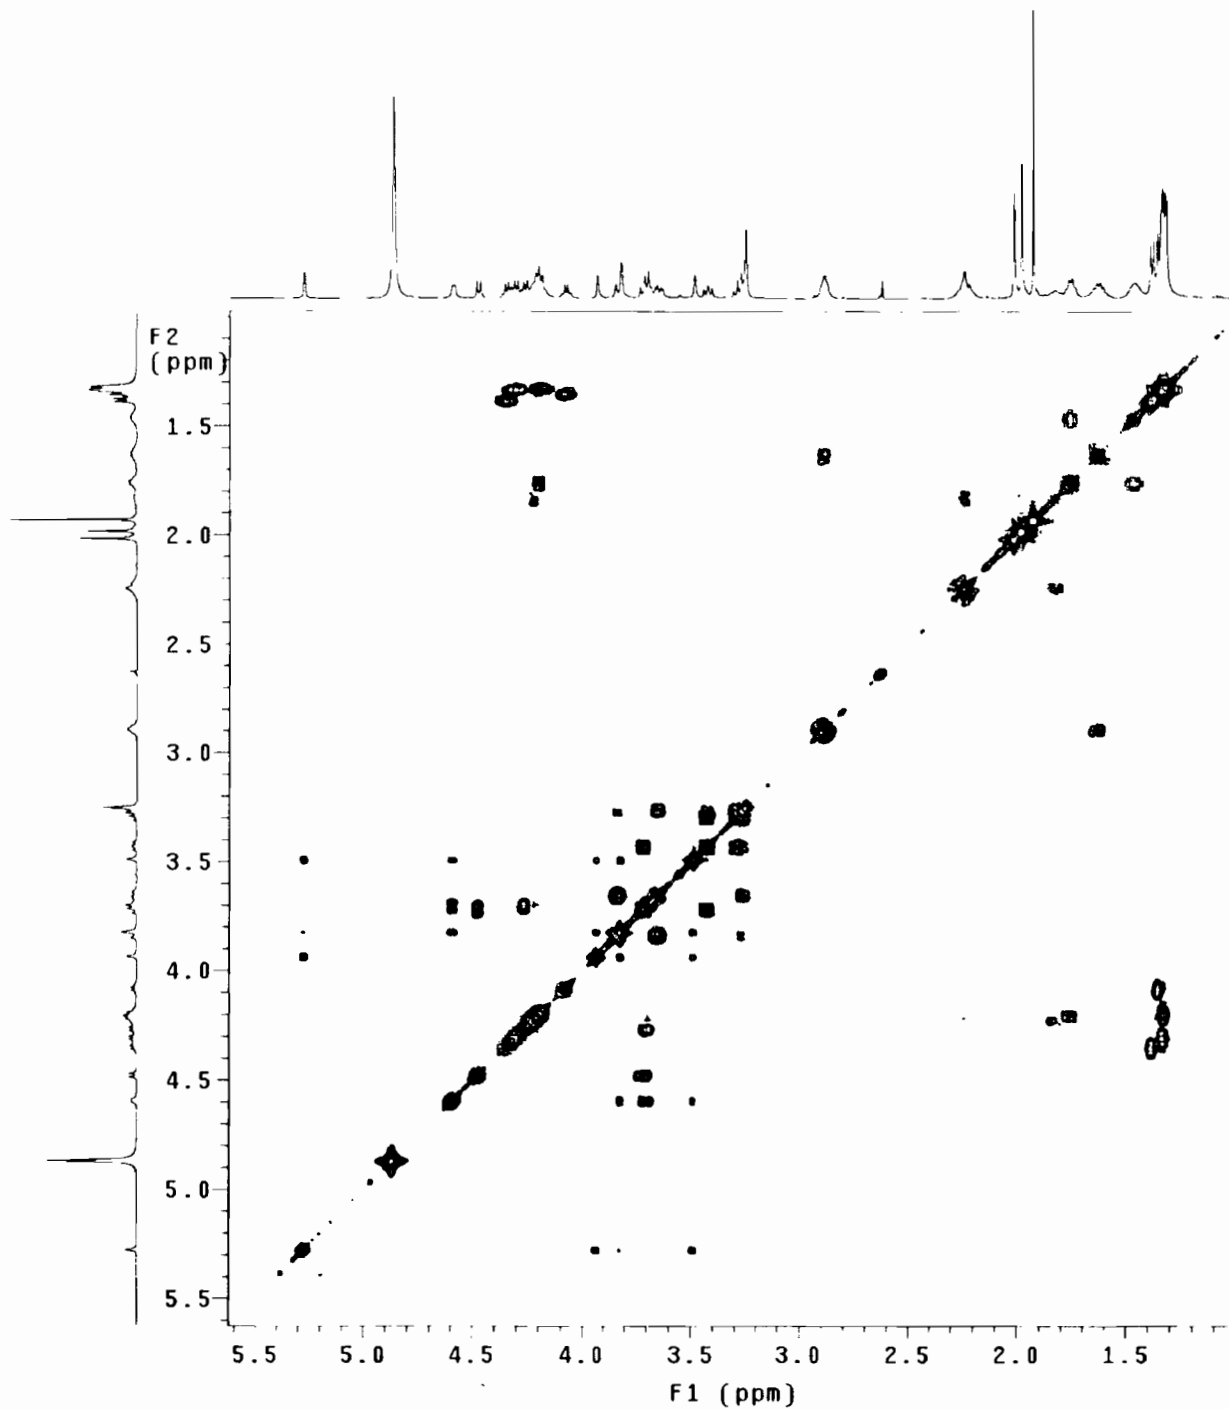

DHL-84

Pulse Sequence: relayh

Solvent: CD3OD

Ambient temperature

INOVA-500 "nmr2a.chem.nd.edu"

Relax. delay 1.300 sec

COSY 90-90

Acq. time 0.220 sec

Width 2326.5 Hz

2D Width 2326.5 Hz

16 repetitions

512 increments

OBSERVE H1, 499.8631721 MHz

DATA PROCESSING

Sine bell 0.110 sec

F1 DATA PROCESSING

Sine bell 0.055 sec

FT size 1024 x 1024

Total time 3 hr, 44 min, 9 sec

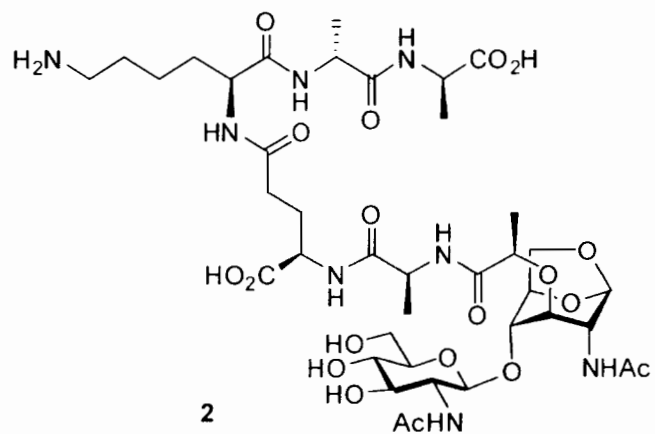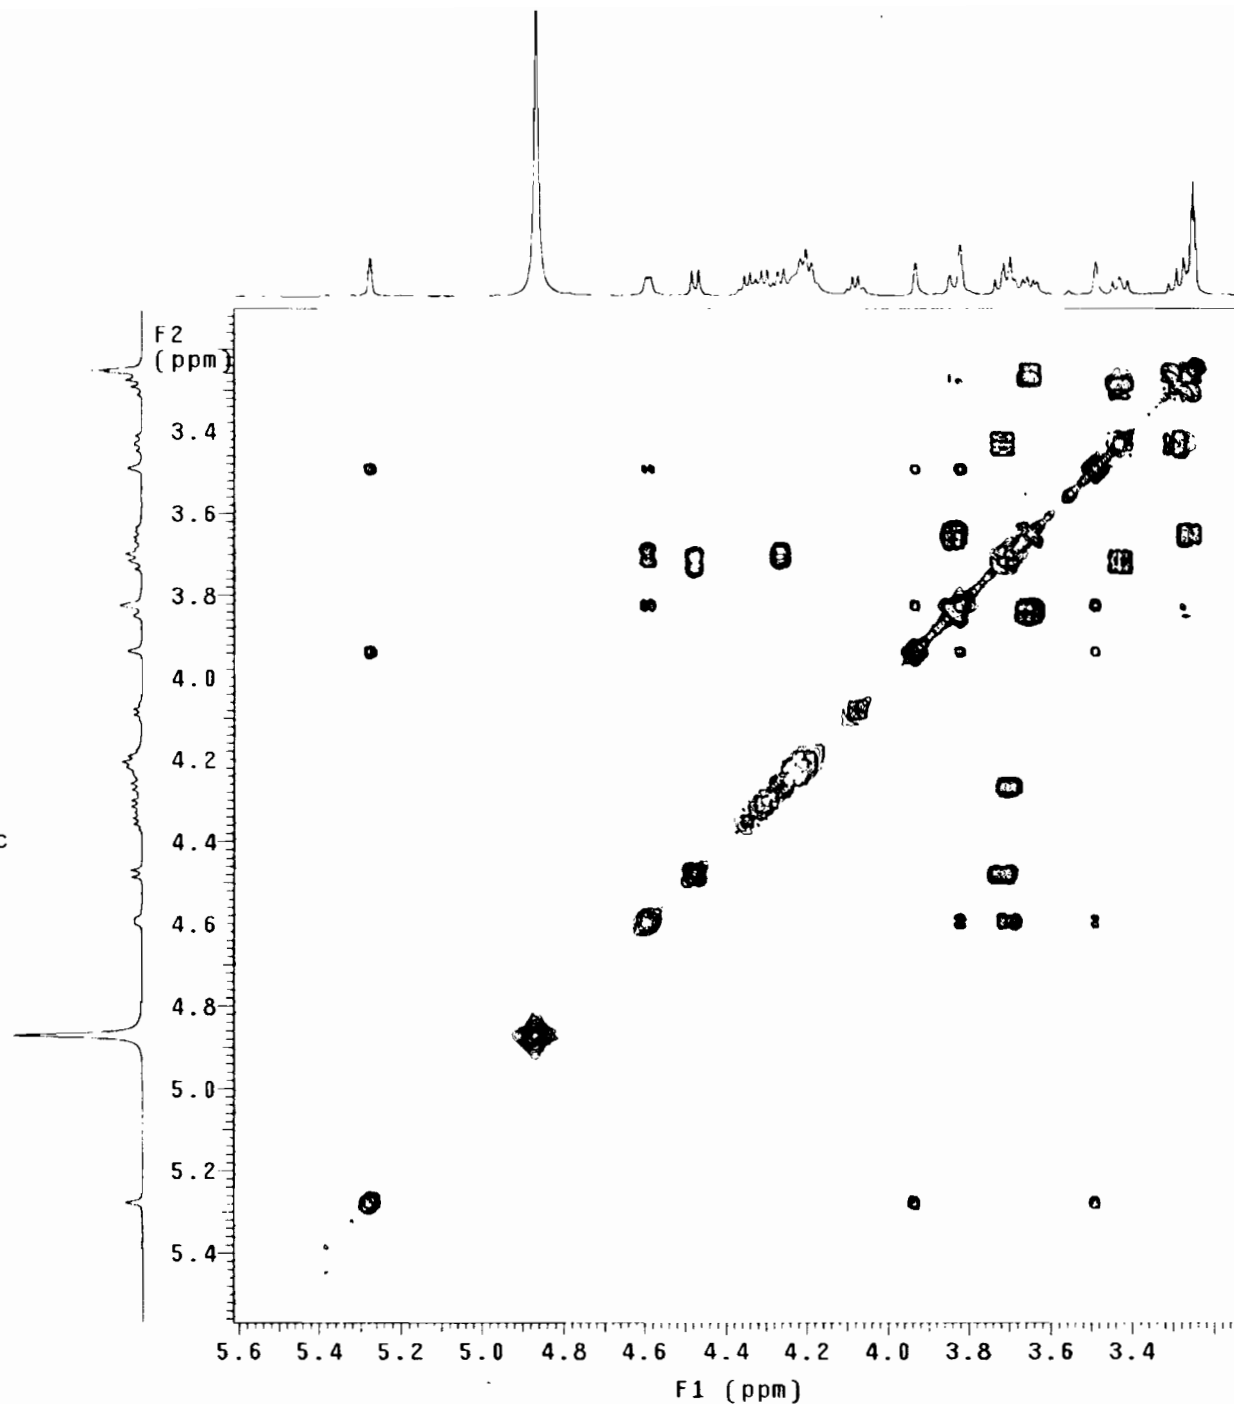

DHL-84

exp2 s2pu1

|             |             |            |         |
|-------------|-------------|------------|---------|
| SAMPLE      |             | DEC. & VT  |         |
| date        | Jun 29 2008 | dfrq       | 499.866 |
| solvent     | cd3od       | dn         | H1      |
| file        | exp         | dpwr       | 40      |
| ACQUISITION |             | dof        | 0       |
| sfrq        | 125.703     | dm         | yyy     |
| tn          | C13         | dmm        | w       |
| at          | 1.215       | dmf        | 8787.35 |
| np          | 65536       | dseq       |         |
| sw          | 26963.3     | dres       | 1.0     |
| fb          | 15000       | homo       | n       |
| bs          | 4           | DEC2       |         |
| tpwr        | 52          | dfrq2      | 0       |
| pw          | 10.2        | dn2        |         |
| d1          | 1.800       | dpwr2      | 1       |
| tof         | 144.5       | dof2       | 0       |
| nt          | 7000        | dm2        | n       |
| ct          | 0           | dmm2       | c       |
| alock       | n           | dmf2       | 10000   |
| gain        | not used    | dseq2      |         |
| FLAGS       |             | dres2      | 1.0     |
| il          | n           | homo2      | n       |
| in          | n           | DEC3       |         |
| dp          | y           | dfrq3      | 0       |
| hs          | nn          | dn3        |         |
| DISPLAY     |             | dpwr3      | 1       |
| sp          | 1565.2      | dof3       | 0       |
| wp          | 21187.2     | dm3        | n       |
| vs          | 526         | dmm3       | c       |
| sc          | 0           | dmf3       | 10000   |
| wc          | 250         | dseq3      |         |
| hzmm        | 84.75       | dres3      | 1.0     |
| is          | 500.00      | homo3      | n       |
| rfl         | 1234.2      | PROCESSING |         |
| rfp         | 0           | lb         | 1.00    |
| th          | 68          | wtfile     |         |
| ins         | 100.000     | proc       | ft      |
| ai          | cdc ph      | fn         | 131072  |
|             |             | math       | f       |

werr  
wexp  
wbs  
wnt

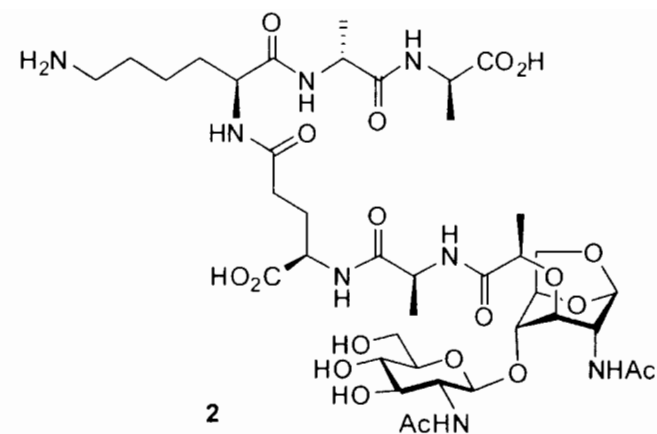

2

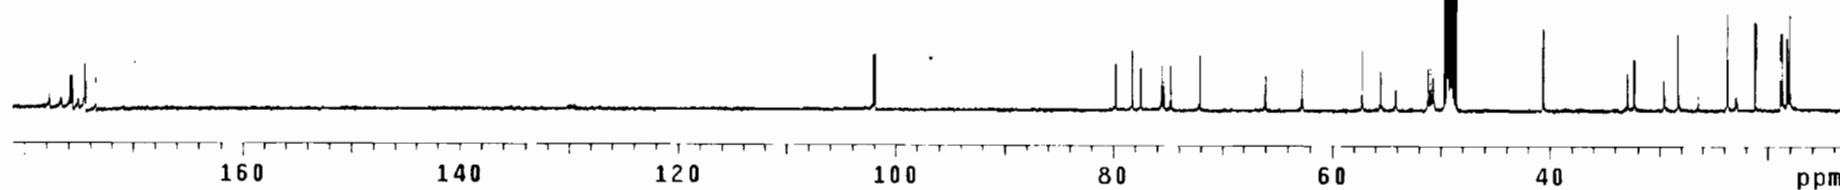

DHL-84

Pulse Sequence: dept

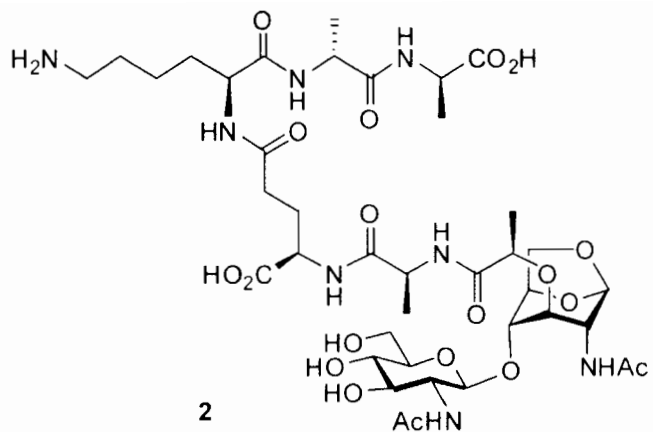

CH3 carbons

CH2 carbons

CH carbons

all protonated carbons

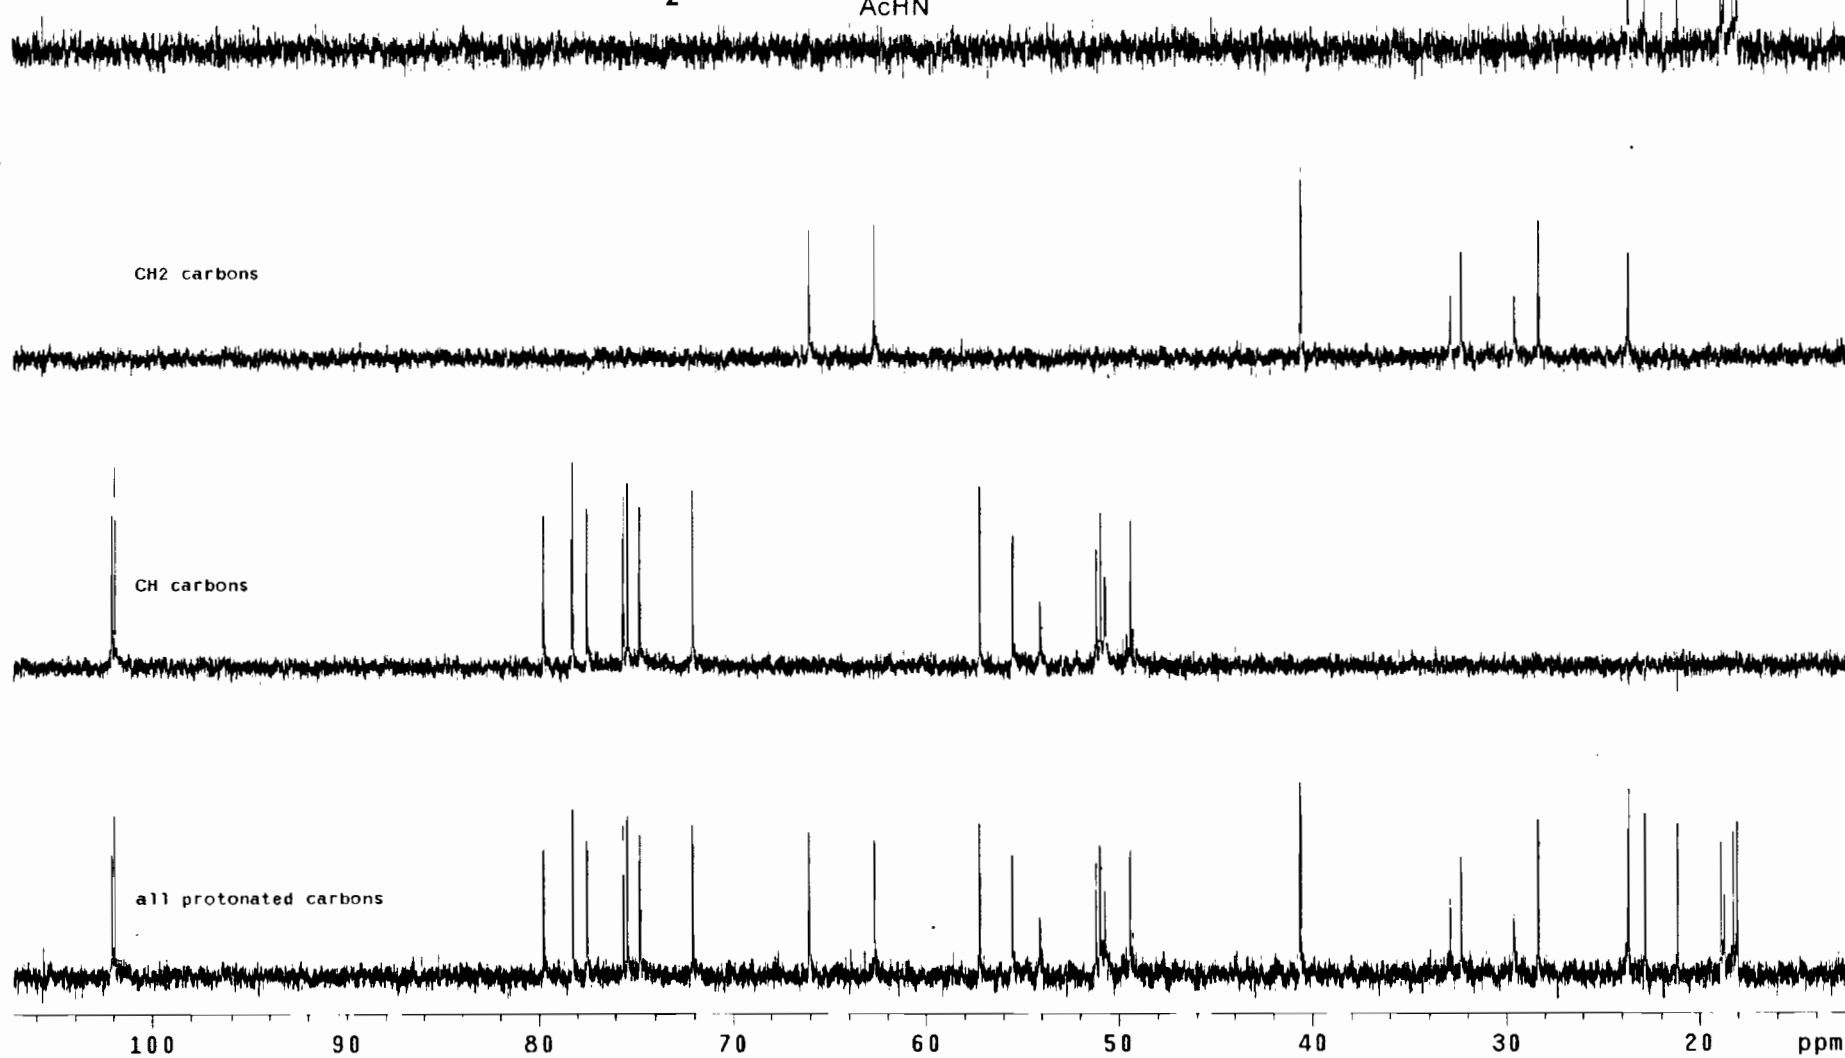

DHL-84

Pulse Sequence: hetcor

Solvent: cd3od

Ambient temperature

User: 1-14-87

INOVA-500 "nmr2a.chem.nd.edu"

Relax. delay 1.500 sec

Acq. time 0.111 sec

Width 18403.5 Hz

2D Width 2360.6 Hz

40 repetitions

512 increments

OBSERVE C13, 125.6904935 MHz

DECOUPLE H1, 499.8647846 MHz

Power 40 dB

on during acquisition

off during delay

WALTZ-16 modulated

DATA PROCESSING

line broadening 1.0 Hz

F1 DATA PROCESSING

line broadening 0.3 Hz

FT size 4096 x 512

Total time 9 hr, 55 min, 21 sec

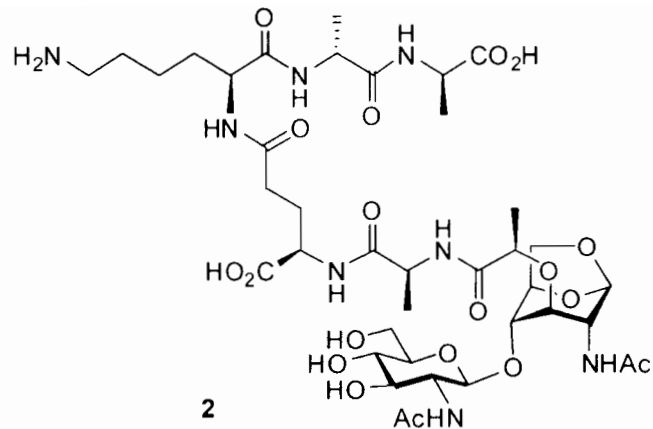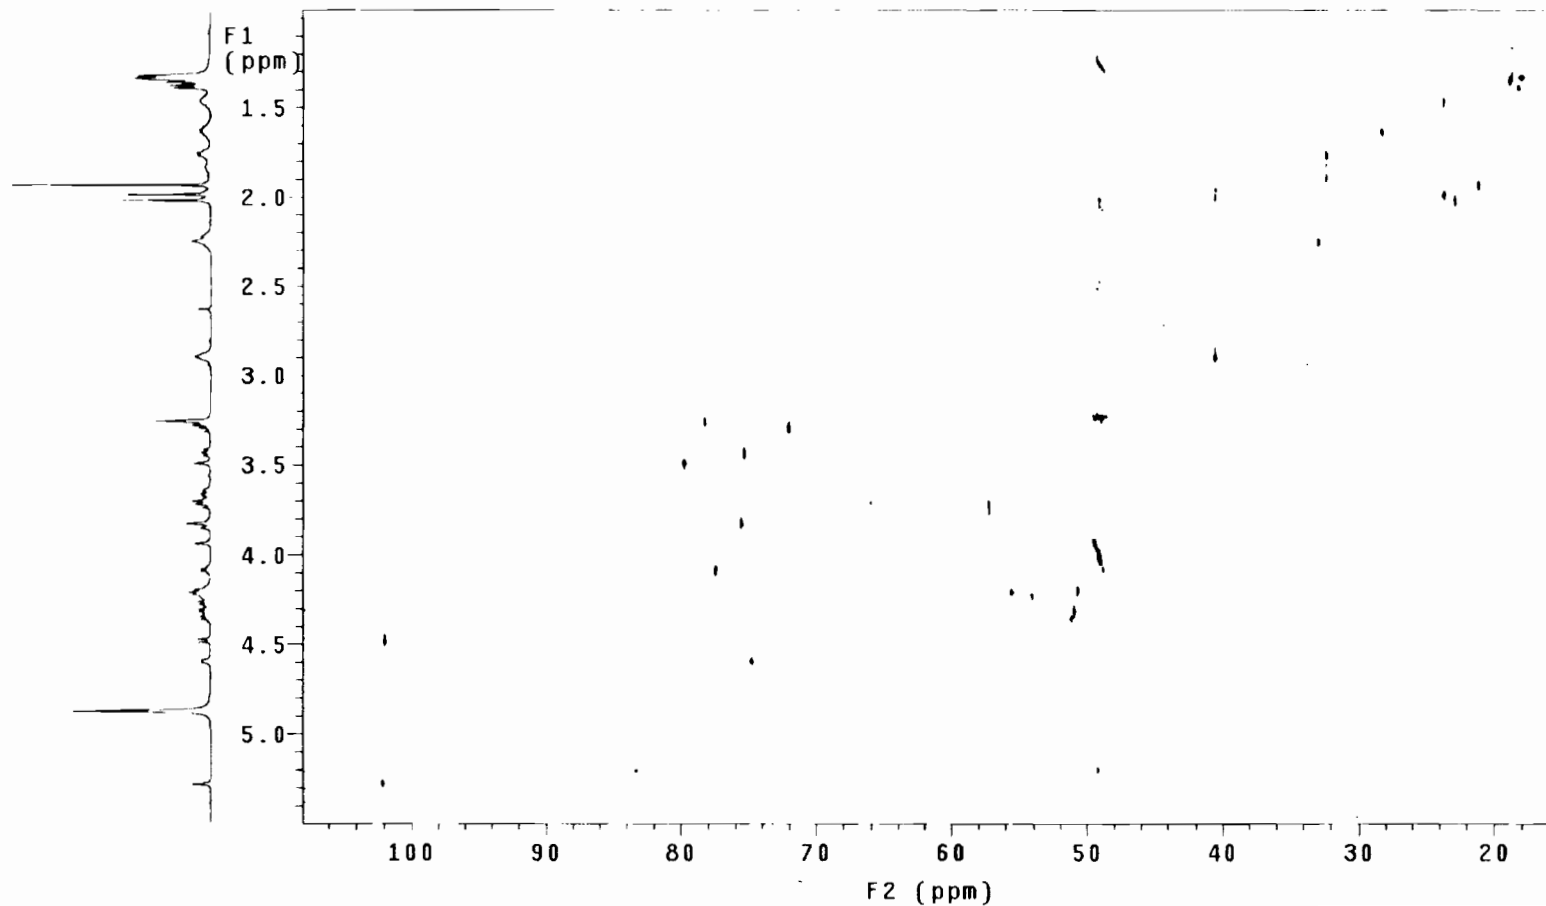

DHL-84

Pulse Sequence: hetcor

Solvent: cd3od

Ambient temperature

User: 1-14-87

INOVA-500 "nmr2a.chem.nd.edu"

Relax. delay 1.500 sec

Acq. time 0.111 sec

Width 18403.5 Hz

2D Width 2360.6 Hz

40 repetitions

512 increments

OBSERVE C13, 125.6904935 MHz

DECOUPLE H1, 499.8647846 MHz

Power 40 dB

on during acquisition

off during delay

WALTZ-16 modulated

DATA PROCESSING

Line broadening 1.0 Hz

F1 DATA PROCESSING

Line broadening 0.3 Hz

FT size 4096 x 512

Total time 9 hr, 55 min, 21 sec

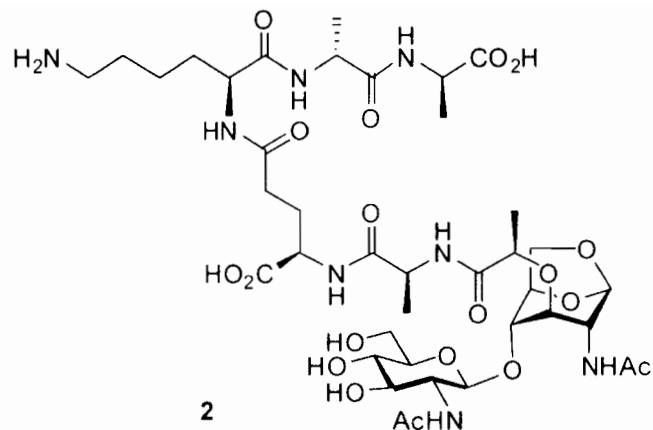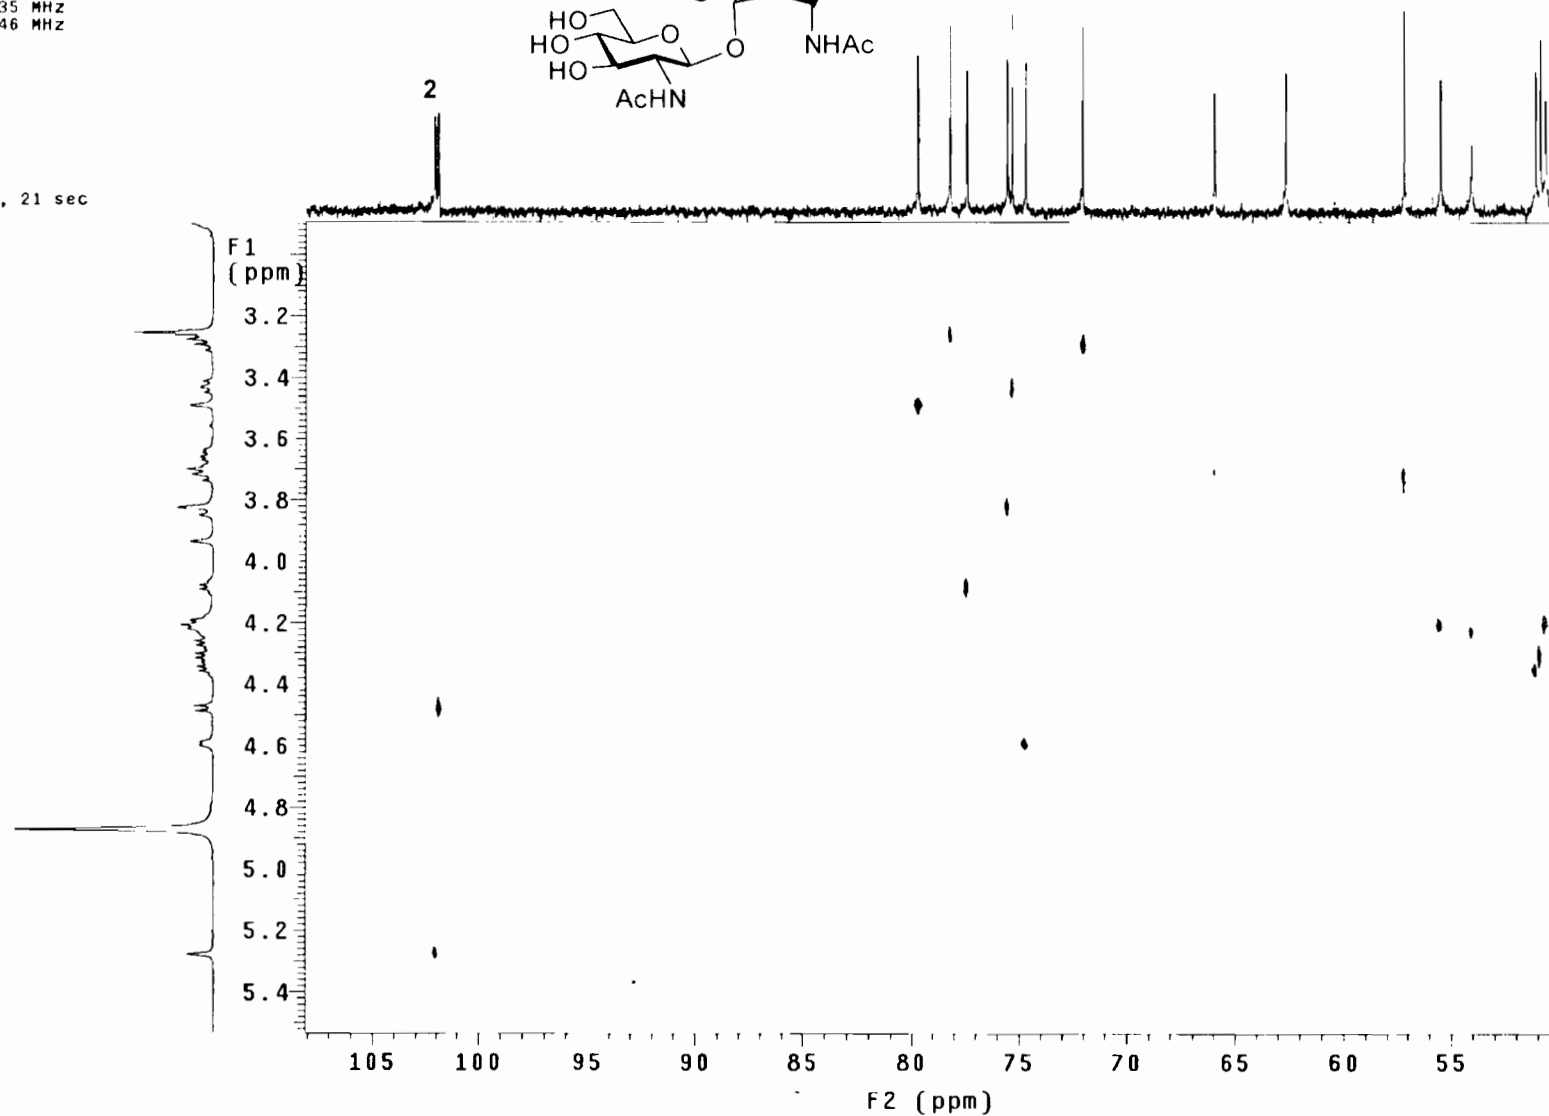

Supplement: NIHMS104928-supplement-1_si_001.pdf [file NIHMS104928-supplement-1_si_001.pdf]
